# Supplementary material
Source: PubMed Central journal article supplement (PMC10292862)
Supplement: NIHMS1905791-supplement-si.pdf [file NIHMS1905791-supplement-si.pdf]

# **Ligand-Enabled C–H Hydroxylation with Aqueous H<sub>2</sub>O<sub>2</sub> at Room Temperature**

Zhen Li,<sup>1†</sup> Han Seul Park,<sup>1†</sup> Jennifer X. Qiao,<sup>2</sup> Kap-Sun Yeung,<sup>3</sup> and Jin-Quan Yu\*

<sup>1</sup>The Scripps Research Institute, 10550 N. Torrey Pines Road, La Jolla, CA  
92037, USA.

<sup>2</sup>Small Molecule Drug Discovery, Bristol Myers Squibb Research and Early  
Development, PO Box 4000, Princeton, NJ 08543, USA.

<sup>3</sup>Small Molecule Drug Discovery, Bristol Myers Squibb Research and Early  
Development, 100 Binney Street, Cambridge, MA 02142, USA.

\*yu200@scripps.edu

† These authors contributed equally

## Table of Contents

|                                                                        |     |
|------------------------------------------------------------------------|-----|
| 1. General information                                                 | S3  |
| 2. Experimental Section for C–H Hydroxylation                          | S4  |
| 2.1. Preparation of Carboxylic Acids Substrates                        | S4  |
| 2.2. Preparation of Bidentate Carboxyl-Pyridone(CarboxPyridone) Ligand | S5  |
| 2.3. Optimization of the C–H Hydroxylation                             | S6  |
| 2.4. General Procedure and Characterisation Data                       | S10 |
| 3. Synthetic Application                                               | S37 |
| 3.1. Large Scale Reactions                                             | S37 |
| 3.2. Further Derivatizations of Phenolic products                      | S40 |
| 3.3. Synthesis of Coumestan and Ptercarpene Derivatives                | S44 |
| 4. Mechanistic Studies                                                 | S48 |
| 4.1. Deuterium-Labeling Experiments                                    | S48 |
| 4.2. KIE Experiments                                                   | S52 |
| 4.3. Stoichiometric Reaction                                           | S54 |
| 4.4. Hydrogen Peroxide Decomposition Experiments                       | S55 |
| 5. References                                                          | S57 |
| NMR Spectra                                                            | S59 |

## 1. General Information:

Hydrogen peroxide (35 wt.% in H<sub>2</sub>O) was purchased from Acros. Solvents were obtained from Sigma-Aldrich, Alfa-Aesar, and Acros, and used directly without further purification. Other reagents were purchased at the highest commercial quality and used without further purification, unless otherwise stated. Analytical thin layer chromatography was performed on 0.25 mm silica gel 60-F254 or Merck pre-coated aluminium-backed silica gel F254 plates. <sup>1</sup>H NMR spectra were recorded on Bruker AMX-400 or Bruker DRX-600 instruments. The following abbreviations (or combinations thereof) were used to explain multiplicities: s = singlet, d = doublet, t = triplet, q = quartet, m = multiplet, br = broad. Coupling constants, *J*, were reported in Hertz unit (Hz). <sup>13</sup>C NMR spectra were recorded on Bruker DRX-600 or JEOL instruments (100 MHz) and were fully decoupled by broad band proton decoupling. <sup>19</sup>F NMR Spectra were recorded on Bruker AMX-399 spectrometer (376 MHz) or JEOL-400 (376 MHz) and were fully decoupled by broad band proton decoupling. Chemical shifts were referenced to the appropriate residual solvent peaks. Column chromatography was carried out automated using Biotage Isolera One with Biotage SNAP Ultra Column. Automated reversed-phase chromatography was carried out using Biotage Isolera One with Biotage SNAP Samplet (C18). High-resolution mass spectra (HRMS) were recorded on an Agilent Mass spectrometer using ESI-TOF (electrospray ionization-time of flight).

## 2. Experimental Section for C–H Hydroxylation

### 2.1. Preparation of Carboxylic Acids Substrates

Carboxylic acid substrates **1aa**, **3e** were obtained from the Bristol-Myers Squibb compounds collection. Substrates **1ak**<sup>1</sup>, **3w**<sup>2</sup> were prepared following the reported procedures. Substrate **1aj** were prepared with the following procedure. Other substrates are commercially available.

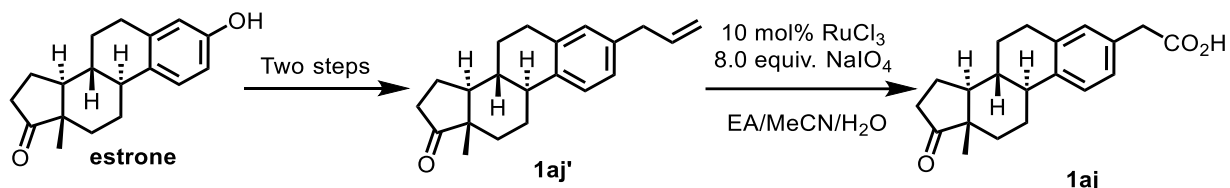

To a solution of **1aj'** (294 mg, 1.0 mmol) (compound **1aj'** was prepared by the known literature<sup>3</sup>) in EtOAc-MeCN-H<sub>2</sub>O 2:2:3 (7 mL) was added RuCl<sub>3</sub> (20.6 mg, 0.1 mmol, 10 mol%). The mixture was stirred and NaIO<sub>4</sub> (1.711 g, 8.0 mmol, 8.0 equiv.) was added in two portions. The reaction solution was stirred vigorously for an additional 6 h. Upon completion, the mixture was diluted with H<sub>2</sub>O and extracted with EtOAc. The combined organic phases were dried, filtered, and evaporated under reduced pressure. The residue was subjected to flash chromatography (Hexane-EtOAc 2:1 with 1% AcOH, v/v) to give **1aj** as a white solid (221.5 mg, 71%).

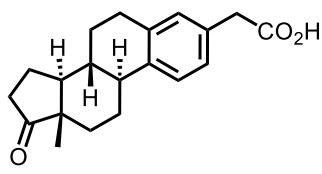

<sup>1</sup>H NMR (600 MHz, Chloroform-*d*) δ 7.26 (d, *J* = 8.0 Hz, 1H), 7.08 (dd, *J* = 8.0, 2.0 Hz, 1H), 7.03 (d, *J* = 2.0 Hz, 1H), 3.59 (s, 2H), 2.93 – 2.90 (m, 2H), 2.58 – 2.47 (m, 1H), 2.46 – 2.38 (m, 1H), 2.33 – 2.25 (m, 1H), 2.21 – 2.13 (m, 1H), 2.09 – 1.94 (m, 3H), 1.68 – 1.59 (m, 2H), 1.56 – 1.39 (m, 4H), 0.91 (s, 3H). <sup>13</sup>C NMR (151 MHz, Chloroform-*d*) δ 221.42, 177.70, 138.88, 136.87, 130.84, 130.00, 126.81, 125.74, 50.51, 48.07, 44.31, 40.63, 38.10, 35.92, 31.59, 29.34, 26.49, 25.70, 21.63, 13.87. HRMS (ESI-TOF) Calcd for C<sub>20</sub>H<sub>23</sub>O<sub>3</sub> [M-H]<sup>-</sup>: 311.1647; found: 311.1647.



## 2.2. Preparation of Bidentate Carboxyl-Pyridone(CarboxPyridone) Ligand

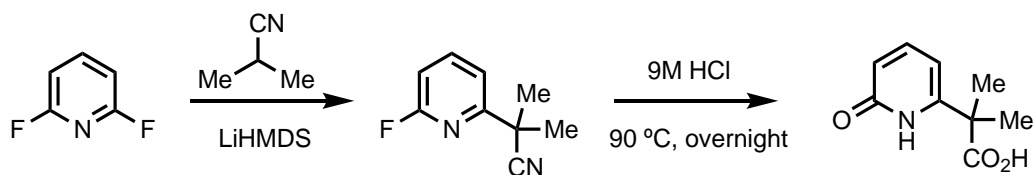

Step 1: A solution of LiHMDS (1.0 equiv.) in toluene was added to a solution of 2,6-difluoropyridine (1.5 equiv.) and isobutyronitrile (1.0 equiv.) in toluene at room temperature. The resulting mixture was heated to 80 °C and stirred for overnight. After cooling the mixture to the room temperature, water was added to quench the reaction and toluene was removed under reduced pressure. The resulting mixture was extracted with ethyl acetate several times and combined organic layers were dried over Na<sub>2</sub>SO<sub>4</sub> and concentrated to afford the product. In most cases, product was pure enough for the next step. If necessary, column chromatography was used for the purification.

Step 2: The 2-(6-fluoropyridin-2-yl)-2-methylpropanenitrile was weighed to the round bottom flask and was added 9M HCl aq. to make 0.3M solution. The resulting mixture was heated to 90 °C and stirred for overnight. The reaction progress can be monitored through LCMS by consumption of the starting materials. After completion, the solution was concentrated under reduced pressure then diluted with H<sub>2</sub>O. 4M NaOH solution was added until the pH reaches 2~3. The resulting aqueous solution was extracted with CHCl<sub>3</sub>/IPA (3:1) several times and combined organic layers were dried and concentrated to afford the product. If the ligand is not pure in this stage, residue was purified by column chromatography on silica gel using DCM/MeOH (20:1 with acetic acid) solution as eluent.

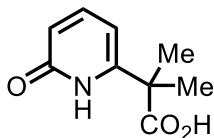

### 2-methyl-2-(6-oxo-1,6-dihydropyridin-2-yl) propanoic acid (L4)

<sup>1</sup>H NMR (600 MHz, Chloroform-*d*) δ 7.54 (dd, *J* = 9.1, 7.2 Hz, 1H), 6.56 (dd, *J* = 9.1, 0.9 Hz, 1H), 6.40 (dd, *J* = 7.2, 0.9 Hz, 1H), 1.64 (s, 6H). <sup>13</sup>C NMR (151 MHz, Chloroform-*d*) δ

179.15, 165.25, 151.36, 142.81, 118.10, 105.13, 46.17, 25.45. HRMS (ESI-TOF) Calcd for  $C_9H_{12}O_3$   $[M+H]^+$ : 182.0812; found: 182.0807.

### 2.3. Optimization of the C–H Hydroxylation

**Table S1. Ligand Effects**

Reaction scheme: **1a** (1 mmol)  $\xrightarrow[3.5 \text{ equiv. H}_2\text{O}_2 \text{ (35\% aq.)}]{2 \text{ mol\% Pd(OAc)}_2, 2-4 \text{ mol\% L, base, solvent, r.t.}}$  **2a**

**L1**

**L2**

**L3**

**L4**

**L5**

**L6**

**L7**

**L8**

| Entry          | Ligand      | Base                            | Solvent | Yield (%) |
|----------------|-------------|---------------------------------|---------|-----------|
| 1 <sup>a</sup> | <b>L1</b>   | K <sub>2</sub> HPO <sub>4</sub> | DMA     | 37        |
| 2              | <b>L1</b>   | K <sub>2</sub> HPO <sub>4</sub> | DMA     | 0         |
| 3              | <b>L2</b>   | K <sub>2</sub> HPO <sub>4</sub> | DMA     | 0         |
| 4              | <b>L3</b>   | K <sub>2</sub> HPO <sub>4</sub> | DMA     | 0         |
| 5              | <b>L4</b>   | K <sub>2</sub> HPO <sub>4</sub> | DMA     | 65        |
| 6              | <b>L5</b>   | K <sub>2</sub> HPO <sub>4</sub> | DMA     | trace     |
| 7              | <b>L6</b>   | K <sub>2</sub> HPO <sub>4</sub> | DMA     | trace     |
| 8 <sup>b</sup> | <b>L7</b>   | K <sub>2</sub> HPO <sub>4</sub> | DMA     | <5        |
| 9 <sup>b</sup> | <b>L8</b>   | K <sub>2</sub> HPO <sub>4</sub> | DMA     | 0         |
| 10             | <b>No L</b> | K <sub>2</sub> HPO <sub>4</sub> | DMA     | 0         |

The reaction was performed with carboxylic acid **1a** (1 mmol), Pd(OAc)<sub>2</sub> (0.02 mmol), ligand (0.04 mmol), H<sub>2</sub>O<sub>2</sub> (35% aqueous solution, 3.5 mmol), and K<sub>2</sub>HPO<sub>4</sub> (1.5 mmol) in DMA (3.0 mL) at room temperature for 24 h. Determined by <sup>1</sup>H NMR yield using CH<sub>3</sub>NO<sub>2</sub> as the internal standard. <sup>a</sup> 90°C. <sup>b</sup> mol% ligand.

**Table S2. Solvent Effect**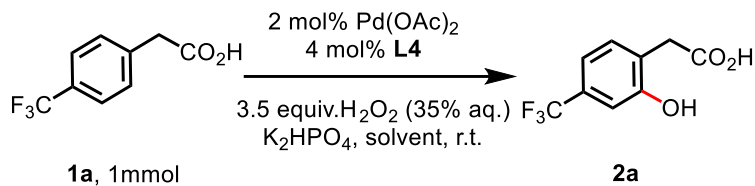

| Entry | Solvent            | Yield (%) |
|-------|--------------------|-----------|
| 1     | DMA                | 65        |
| 2     | DMF                | 53        |
| 3     | THF                | 16        |
| 4     | NMP                | 46        |
| 5     | DMSO               | <2        |
| 6     | HFIP               | <2        |
| 7     | CH <sub>3</sub> CN | 86        |
| 8     | Acetone            | 50        |
| 9     | <i>t</i> -Amyl-OH  | 37        |
| 10    | DCE                | 35        |

The reaction was performed with carboxylic acid **1a** (1 mmol), Pd(OAc)<sub>2</sub> (0.02 mmol), ligand (0.04 mmol), H<sub>2</sub>O<sub>2</sub> (35% aqueous solution, 3.5 mmol), and K<sub>2</sub>HPO<sub>4</sub> (1.5 mmol) in solvent (3.0 mL) at room temperature for 24 h. Determined by <sup>1</sup>H NMR yield using CH<sub>3</sub>NO<sub>2</sub> as the internal standard.

**Table S3. Base Effect**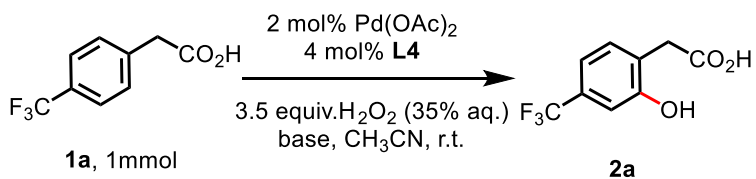

| Entry | Base                            | Solvent            | Yield (%) |
|-------|---------------------------------|--------------------|-----------|
| 1     | K <sub>2</sub> HPO <sub>4</sub> | CH <sub>3</sub> CN | 86        |
| 2     | K <sub>3</sub> PO <sub>4</sub>  | CH <sub>3</sub> CN | <2        |
| 3     | KH <sub>2</sub> PO <sub>4</sub> | CH <sub>3</sub> CN | <2        |
| 4     | K <sub>2</sub> CO <sub>3</sub>  | CH <sub>3</sub> CN | <2        |
| 5     | KHCO <sub>3</sub>               | CH <sub>3</sub> CN | <2        |
| 6     | CsOAc                           | CH <sub>3</sub> CN | 60        |
| 7     | NaOAc                           | CH <sub>3</sub> CN | 55        |
| 8     | KOAc                            | CH <sub>3</sub> CN | 58        |
| 9     | Na <sub>3</sub> PO <sub>4</sub> | CH <sub>3</sub> CN | <2        |
| 10    | /                               | CH <sub>3</sub> CN | 8         |

|    |                                  |     |    |
|----|----------------------------------|-----|----|
| 11 | K <sub>2</sub> HPO <sub>4</sub>  | DMA | 65 |
| 12 | KHCO <sub>3</sub>                | DMA | 80 |
| 13 | K <sub>2</sub> CO <sub>3</sub>   | DMA | <2 |
| 14 | K <sub>3</sub> PO <sub>4</sub>   | DMA | 17 |
| 15 | NaOAc                            | DMA | 42 |
| 16 | Na <sub>2</sub> HPO <sub>4</sub> | DMA | 25 |
| 17 | KH <sub>2</sub> PO <sub>4</sub>  | DMA | 5  |
| 18 | KOH                              | DMA | <2 |

The reaction was performed with carboxylic acid **1a** (1 mmol), Pd(OAc)<sub>2</sub> (0.02 mmol), ligand (0.04 mmol), H<sub>2</sub>O<sub>2</sub> (35% aqueous solution, 3.5 mmol), and base (1.5 mmol) in solvent(3.0 mL) at room temperature for 24 h. Determined by <sup>1</sup>H NMR yield using CH<sub>3</sub>NO<sub>2</sub> as the internal standard.

**Table S4. Ligand loading effect**

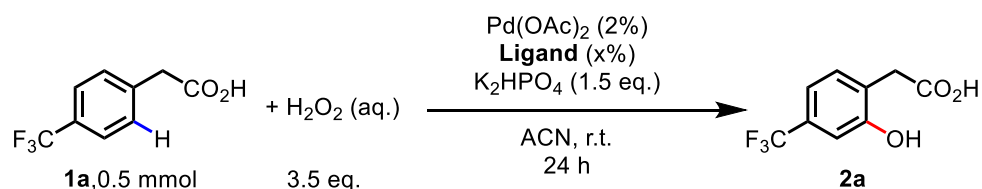

| ligand loading | L1         | L4  | L7         | L8         |
|----------------|------------|-----|------------|------------|
| 2%             | No Product | 73% | No Product | No Product |
| 4%             | No Product | 87% | No Product | No Product |
| 6%             | No Product | 77% | No Product | No Product |
| 8%             | No Product | 77% | No Product | No Product |
| 10%            | No Product | 65% | No Product | No Product |

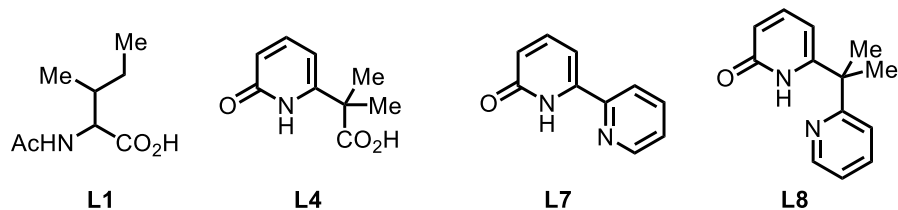

The reaction was performed with carboxylic acid **1a** (0.5 mmol), Pd(OAc)<sub>2</sub> (2 mol%), ligand (x mol%), H<sub>2</sub>O<sub>2</sub> (35% aqueous solution, 3.5 eq and K<sub>2</sub>HPO<sub>4</sub> (1.5 eq) in acetonitrile (1.5 mL) at room temperature for 24 h. Determined by <sup>1</sup>H NMR yield using CH<sub>3</sub>NO<sub>2</sub> as the internal standard.

**Table S5. Oxidant effect**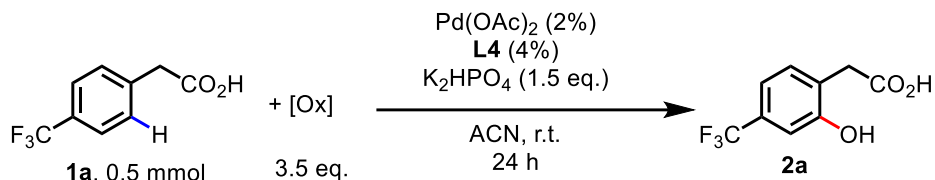

| Oxidant                                   | Yield      | Oxidant                                                | Yield |
|-------------------------------------------|------------|--------------------------------------------------------|-------|
| $\text{K}_2\text{S}_2\text{O}_8$          | No Product | TBHP in $\text{H}_2\text{O}$ (70%)                     | 8%    |
| $(\text{NH}_4)_2\text{S}_2\text{O}_8$     | No Product | TBHP in decane (~5.5M)                                 | 11%   |
| $\text{PhI(OAc)}_2$                       | No Product | $\text{H}_2\text{O}_2$ in $\text{H}_2\text{O}$ (35%)   | 87%   |
| selectfluor                               | No Product | $\text{Na}_2\text{CO}_3 \cdot 1.5\text{H}_2\text{O}_2$ | trace |
| selectfluor+ $\text{H}_2\text{O}$ (150uL) | No Product | $\text{H}_2\text{O}_2 \cdot \text{Urea}$               | 24%   |

The reaction was performed with carboxylic acid **1a** (0.5 mmol),  $\text{Pd(OAc)}_2$  (2 mol%), **L4** (4 mol%), oxidant (3.5 eq), and  $\text{K}_2\text{HPO}_4$  (1.5 eq) in acetonitrile (1.5 mL) at room temperature for 24 h. Determined by  $^1\text{H}$  NMR yield using  $\text{CH}_3\text{NO}_2$  as the internal standard.

**Table S6. Control experiments**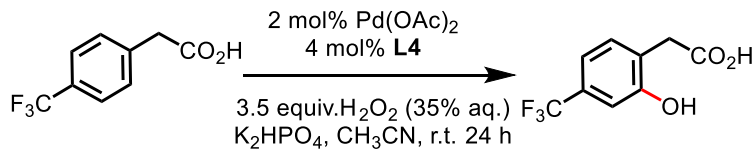

| Entry | Conditions                   | Yield (%) |
|-------|------------------------------|-----------|
| 1     | /                            | 86        |
| 2     | w/o $\text{Pd(OAc)}_2$       | 0         |
| 3     | w/o ligand                   | 0         |
| 4     | w/o $\text{H}_2\text{O}_2$   | 0         |
| 5     | w/o $\text{K}_2\text{HPO}_4$ | 8         |
| 6     | 1 mol% $\text{Pd(OAc)}_2$    | 76        |
| 7     | 0.5 mol% $\text{Pd(OAc)}_2$  | 46        |
| 8     | 0.1 mol% $\text{Pd(OAc)}_2$  | 5         |
| 9     | 6 h                          | 44        |
| 10    | 12 h                         | 80        |

The reaction was performed with carboxylic acid **1a** (1 mmol), Pd(OAc)<sub>2</sub> (0.02 mmol), ligand (0.04 mmol), H<sub>2</sub>O<sub>2</sub> (35% aqueous solution, 3.5 mmol), and K<sub>2</sub>HPO<sub>4</sub> (1.5 mmol) in CH<sub>3</sub>CN (3.0 mL) at room temperature for 24 h. Determined by <sup>1</sup>H NMR yield using CH<sub>3</sub>NO<sub>2</sub> as the internal standard.

**Table S7. Optimization using 2,4-difluorobenzoic acid as a substrate**

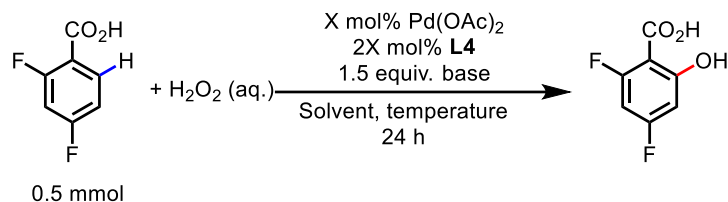

| Pd loading | Solvent | Base                                               | Temp. | Yield      |
|------------|---------|----------------------------------------------------|-------|------------|
| 2%         | ACN     | K <sub>2</sub> HPO <sub>4</sub>                    | r.t.  | No product |
| 2%         | ACN     | K <sub>2</sub> HPO <sub>4</sub> •3H <sub>2</sub> O | r.t.  | No product |
| 5%         | ACN     | K <sub>2</sub> HPO <sub>4</sub> •3H <sub>2</sub> O | r.t.  | trace      |
| 5%         | ACN     | K <sub>2</sub> HPO <sub>4</sub> •3H <sub>2</sub> O | 60 °C | 20%        |
| 5%         | DMA     | K <sub>2</sub> HPO <sub>4</sub> •3H <sub>2</sub> O | 60 °C | 33%        |
| 5%         | DMA     | KHCO <sub>3</sub>                                  | 60 °C | 64%        |
| 5%         | DMA     | NaOAc                                              | 60 °C | 70%        |
| 5%         | DMA     | KOAc                                               | 60 °C | 25%        |
| 5%         | DMA     | CsOAc                                              | 60 °C | 78%        |

The reaction was performed with carboxylic acid **1a** (0.5 mmol), Pd(OAc)<sub>2</sub> (0.01 mmol), ligand (0.02 mmol), H<sub>2</sub>O<sub>2</sub> (35% aqueous solution, 1.75 mmol), and base (0.75 mmol) in CH<sub>3</sub>CN or DMA (1.5 mL) for 24 h. Determined by <sup>1</sup>H NMR yield using CH<sub>3</sub>NO<sub>2</sub> as the internal standard.

## 2.4. General Procedures and Characterisation Data

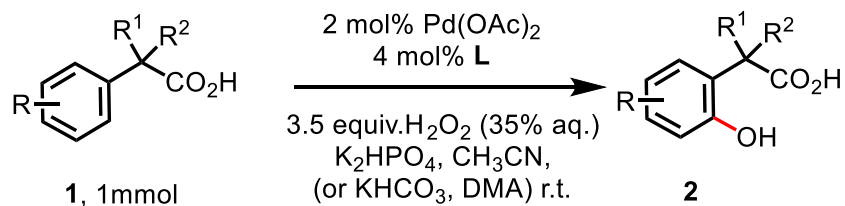

### General Procedure for C(sp<sup>2</sup>)-H hydroxylation of phenylacetic acids

Pd(OAc)<sub>2</sub> (4.5 mg, 0.02 mmol, 2 mol%), **L4** (7.3 mg, 0.04 mmol, 4 mol%), carboxylic acid **1** (1.0 mmol), and K<sub>2</sub>HPO<sub>4</sub> (260.0 mg, 1.5 mmol, 1.5 equiv.) were weighed and placed in an 8 mL vial. Then, CH<sub>3</sub>CN (3.0 mL) was added and stirred for 10 min, followed by the addition of H<sub>2</sub>O<sub>2</sub> (35% aq., 300 uL, 3.5 equiv.). The vial was sealed with a screw cap and stirred at ambient temperature for 24 h (typically ran at 25 °C unless otherwise noted). Upon completion, the reaction was diluted with methanol and acidified with 0.3 mL formic acid. The solution was filtered through a pad of Celite and washed with methanol then concentrated under vacuum (The organic phase should be tested by the potassium iodide starch test paper before concentration, and quenched with Na<sub>2</sub>S<sub>2</sub>O<sub>3</sub> aq. solution if necessary). The crude mixture was purified by flash chromatography (Hexane/EtOAc or DCM/MeOH with 1% AcOH, v/v).

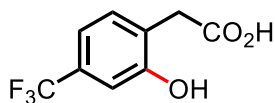

### 2-(2-hydroxy-4-(trifluoromethyl)phenyl)acetic acid (**2a**)

Substrate **1a** was hydroxylated following general procedure, the hydroxylated product **2a** was obtained as a greyish white solid (175 mg, 80%), <sup>1</sup>H NMR (600 MHz, Methanol-*d*<sub>4</sub>) δ 7.30 (d, *J* = 7.8 Hz, 1H), 7.06 (d, *J* = 7.9 Hz, 1H), 7.03 (s, 1H), 3.65 (s, 2H). <sup>13</sup>C NMR (151 MHz, Methanol-*d*<sub>4</sub>) δ 175.27, 157.32, 132.82, 131.44 (q, *J* = 32.2 Hz), 127.45, 125.60 (q, *J* = 271.4 Hz), 116.75 (q, *J* = 3.9 Hz), 112.20 (q, *J* = 3.8 Hz), 36.30. <sup>19</sup>F NMR (376 MHz, Methanol-*d*<sub>4</sub>) δ -66.76. HRMS (ESI-TOF) Calcd for C<sub>9</sub>H<sub>6</sub>F<sub>3</sub>O<sub>3</sub> [M-H]<sup>-</sup>: 219.0269; found: 219.0270.

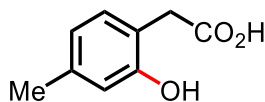

### 2-(2-hydroxy-4-methylphenyl)acetic acid (**2b**)

Substrate **1b** was hydroxylated following general procedure, the hydroxylated product **2b** was obtained as a white solid (145 mg, 87%), <sup>1</sup>H NMR (600 MHz, Methanol-*d*<sub>4</sub>) δ 6.97 (d, *J*

= 7.5 Hz, 1H), 6.63 – 6.56 (m, 2H), 3.53 (s, 2H), 2.24 (s, 3H). <sup>13</sup>C NMR (151 MHz, Methanol-*d*<sub>4</sub>) δ 176.42, 156.54, 139.24, 131.83, 121.14, 119.76, 116.58, 36.18, 21.23. HRMS (ESI-TOF) Calcd for C<sub>9</sub>H<sub>9</sub>O<sub>3</sub> [M-H]<sup>-</sup>: 165.0552; found: 165.0552.

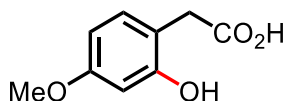

### 2-(2-hydroxy-4-methoxyphenyl)acetic acid (2c)

Substrate **1c** was hydroxylated following general procedure with KHCO<sub>3</sub> (200.2 mg, 2.0 mmol, 2.0 equiv.) and DMA (3.0 mL) instead of CH<sub>3</sub>CN and K<sub>2</sub>HPO<sub>4</sub>, the hydroxylated product **2c** was obtained as a white solid (132 mg, 73%), <sup>1</sup>H NMR (600 MHz, Methanol-*d*<sub>4</sub>) δ 6.99 (d, *J* = 8.2 Hz, 1H), 6.40 – 6.34 (m, 2H), 3.72 (s, 3H), 3.50 (s, 2H). <sup>13</sup>C NMR (151 MHz, Methanol-*d*<sub>4</sub>) δ 176.61, 161.41, 157.55, 132.45, 115.27, 105.62, 102.22, 55.59, 35.87. HRMS (ESI-TOF) Calcd for C<sub>9</sub>H<sub>9</sub>O<sub>4</sub> [M-H]<sup>-</sup>: 181.0501; found: 181.0502.

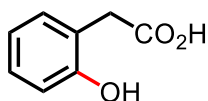

### 2-(2-hydroxyphenyl)acetic acid (2d)

Substrate **1d** was hydroxylated following general procedure, the hydroxylated product **2d** was obtained as a white solid (129 mg, 85%), <sup>1</sup>H NMR (600 MHz, Methanol-*d*<sub>4</sub>) δ 7.14 – 7.04 (m, 2H), 6.78 – 6.75 (m, 2H), 3.58 (s, 2H). <sup>13</sup>C NMR (151 MHz, Methanol-*d*<sub>4</sub>) δ 176.22, 156.77, 132.07, 129.25, 122.84, 120.41, 115.88, 36.53. HRMS (ESI-TOF) Calcd for C<sub>8</sub>H<sub>7</sub>O<sub>3</sub> [M-H]<sup>-</sup>: 151.0395; found: 151.0393.

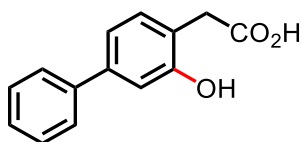

### 2-(3-hydroxy-[1,1'-biphenyl]-4-yl)acetic acid (2e)

Substrate **1e** was hydroxylated following general procedure with KHCO<sub>3</sub> (200.2 mg, 2.0 mmol, 1.5 equiv.) and DMA (3.0 mL) instead of CH<sub>3</sub>CN and K<sub>2</sub>HPO<sub>4</sub>, the hydroxylated



product **2e** was obtained as an ivory solid (179 mg, 79%),  $^1\text{H}$  NMR (600 MHz, Methanol- $d_4$ )  $\delta$  7.58 – 7.52 (m, 2H), 7.42 – 7.36 (m, 2H), 7.32 – 7.25 (m, 1H), 7.18 (d,  $J = 7.7$  Hz, 1H), 7.07 – 7.01 (m, 2H), 3.63 (s, 2H).  $^{13}\text{C}$  NMR (151 MHz, Methanol- $d_4$ )  $\delta$  176.16, 157.06, 142.78, 142.32, 132.48, 129.71, 128.20, 127.80, 122.00, 119.09, 114.38, 36.26. HRMS (ESI-TOF) Calcd for  $\text{C}_{14}\text{H}_{11}\text{O}_3$   $[\text{M}-\text{H}]^-$ : 227.0708; found: 227.0714.

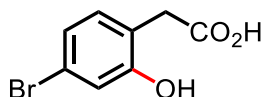

#### 2-(4-bromo-2-hydroxyphenyl)acetic acid (**2f**)

Substrate **1f** was hydroxylated following general procedure, the hydroxylated product **2f** was obtained as white solid (200 mg, 87%),  $^1\text{H}$  NMR (600 MHz, Methanol- $d_4$ )  $\delta$  7.03 (d,  $J = 8.0$  Hz, 1H), 6.95 (d,  $J = 2.0$  Hz, 1H), 6.92 (dd,  $J = 8.0, 2.0$  Hz, 1H), 3.54 (s, 2H).  $^{13}\text{C}$  NMR (151 MHz, Methanol- $d_4$ )  $\delta$  175.56, 157.93, 133.46, 123.22, 122.44, 121.87, 118.80, 35.97. HRMS (ESI-TOF) Calcd for  $\text{C}_8\text{H}_6\text{BrO}_3$   $[\text{M}-\text{H}]^-$ : 228.9500; found: 228.9503.

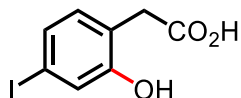

#### 2-(2-hydroxy-4-iodophenyl)acetic acid (**2g**)

Substrate **1g** was hydroxylated following general procedure with  $\text{KHCO}_3$  (200.2 mg, 2.0 mmol, 2.0 equiv.) and DMA (3.0 mL) instead of  $\text{CH}_3\text{CN}$  and  $\text{K}_2\text{HPO}_4$ , the hydroxylated product **2g** was obtained as a white solid (184 mg, 66%),  $^1\text{H}$  NMR (600 MHz, Methanol- $d_4$ )  $\delta$  7.14 (d,  $J = 1.7$  Hz, 1H), 7.11 (dd,  $J = 7.9, 1.7$  Hz, 1H), 6.87 (d,  $J = 7.9$  Hz, 1H), 3.53 (s, 2H).  $^{13}\text{C}$  NMR (151 MHz, Methanol- $d_4$ )  $\delta$  175.55, 157.81, 133.68, 129.48, 124.79, 123.05, 92.89, 36.07. HRMS (ESI-TOF) Calcd for  $\text{C}_8\text{H}_6\text{IO}_3$   $[\text{M}-\text{H}]^-$ : 276.9362; found: 276.9365.

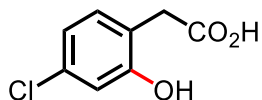

#### 2-(4-chloro-2-hydroxyphenyl)acetic acid (**2h**)

Substrate **1h** was hydroxylated following general procedure, the hydroxylated product **2h** was obtained as a white solid (150 mg, 81%),  $^1\text{H}$  NMR (600 MHz, Methanol- $d_4$ )  $\delta$  7.08 (d,  $J$  = 8.0 Hz, 1H), 6.79 (d,  $J$  = 2.1 Hz, 1H), 6.77 (dd,  $J$  = 8.0, 2.2 Hz, 1H), 3.55 (s, 2H).  $^{13}\text{C}$  NMR (151 MHz, Methanol- $d_4$ )  $\delta$  175.67, 157.75, 134.16, 133.10, 121.95, 120.21, 115.87, 35.90. HRMS (ESI-TOF) Calcd for  $\text{C}_8\text{H}_6\text{ClO}_3$   $[\text{M}-\text{H}]^-$ : 185.0005; found: 185.0005.

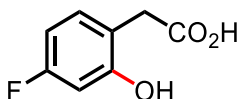

### 2-(4-fluoro-2-hydroxyphenyl)acetic acid (**2i**)

Substrate **1i** was hydroxylated following general procedure with  $\text{KHCO}_3$  (200.2 mg, 2.0 mmol, 2.0 equiv.) and DMA (3.0 mL) instead of  $\text{CH}_3\text{CN}$  and  $\text{K}_2\text{HPO}_4$ , the hydroxylated product **2i** was obtained as a white solid (123 mg, 72%),  $^1\text{H}$  NMR (600 MHz, Methanol- $d_4$ )  $\delta$  7.09 (dd,  $J$  = 8.3, 6.7 Hz, 1H), 6.56 – 6.44 (m, 2H), 3.54 (s, 2H).  $^{13}\text{C}$  NMR (151 MHz, Methanol- $d_4$ )  $\delta$  176.04, 164.05 (d,  $J$  = 242.5 Hz), 158.05 (d,  $J$  = 11.0 Hz), 132.89 (d,  $J$  = 10.1 Hz), 119.03 (d,  $J$  = 3.2 Hz), 106.55 (d,  $J$  = 21.4 Hz), 103.04 (d,  $J$  = 24.3 Hz), 35.82.  $^{19}\text{F}$  NMR (376 MHz, Methanol- $d_4$ )  $\delta$  -119.34. HRMS (ESI-TOF) Calcd for  $\text{C}_8\text{H}_6\text{FO}_3$   $[\text{M}-\text{H}]^-$ : 169.0301; found: 169.0306.

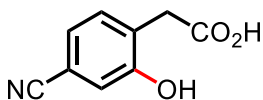

### 2-(4-cyano-2-hydroxyphenyl)acetic acid (**2j**)

Substrate **1j** was hydroxylated following general procedure at 60 °C, the hydroxylated product **2j** was obtained as a yellow solid (131 mg, 74%),  $^1\text{H}$  NMR (600 MHz, Methanol- $d_4$ )  $\delta$  7.30 (d,  $J$  = 7.7 Hz, 1H), 7.14 (dd,  $J$  = 7.8, 1.6 Hz, 1H), 7.05 (d,  $J$  = 1.6 Hz, 1H), 3.65 (s, 2H).  $^{13}\text{C}$  NMR (151 MHz, Methanol- $d_4$ )  $\delta$  174.80, 157.51, 133.34, 129.47, 124.14, 119.78, 118.45, 112.48, 36.44. HRMS (ESI-TOF) Calcd for  $\text{C}_9\text{H}_6\text{NO}_3$   $[\text{M}-\text{H}]^-$ : 176.0348; found: 176.0345.

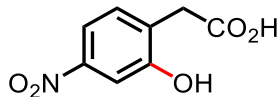

### 2-(2-hydroxy-4-nitrophenyl)acetic acid (**2k**)

Substrate **1k** was hydroxylated following general procedure at 60 °C, the hydroxylated product **2k** was obtained as an orange solid (138 mg, 70%), <sup>1</sup>H NMR (600 MHz, Methanol-*d*<sub>4</sub>) δ 7.66 (dd, *J* = 8.3, 2.3 Hz, 1H), 7.62 (d, *J* = 2.3 Hz, 1H), 7.35 (d, *J* = 8.3 Hz, 1H), 3.69 (s, 2H). <sup>13</sup>C NMR (151 MHz, Methanol-*d*<sub>4</sub>) δ 174.66, 157.60, 149.32, 132.74, 130.99, 115.08, 110.07, 36.33. HRMS (ESI-TOF) Calcd for C<sub>8</sub>H<sub>6</sub>NO<sub>5</sub> [M-H]<sup>-</sup>: 196.0246; found: 196.0247.

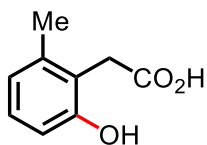

### 2-(2-hydroxy-6-methylphenyl)acetic acid (**2l**)

Substrate **1l** was hydroxylated following general procedure, the hydroxylated product **2l** was obtained as an ivory solid (143 mg, 86%), <sup>1</sup>H NMR (600 MHz, Methanol-*d*<sub>4</sub>) δ 6.95 (t, *J* = 7.8 Hz, 1H), 6.73 – 6.59 (m, 2H), 3.67 (s, 2H), 2.24 (s, 3H). <sup>13</sup>C NMR (151 MHz, Methanol-*d*<sub>4</sub>) δ 176.07, 156.75, 139.49, 128.48, 122.21, 121.57, 113.48, 32.42, 19.78. HRMS (ESI-TOF) Calcd for C<sub>9</sub>H<sub>9</sub>O<sub>3</sub> [M-H]<sup>-</sup>: 165.0552; found: 165.0550.

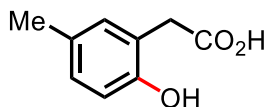

### 2-(2-hydroxy-5-methylphenyl)acetic acid (**2m**)

Substrate **1m** was hydroxylated following general procedure, the hydroxylated product **2m** was obtained as a white solid (131 mg, 79%), <sup>1</sup>H NMR (600 MHz, Methanol-*d*<sub>4</sub>) δ 6.92 (d, *J* = 2.2 Hz, 1H), 6.88 (dd, *J* = 8.1, 2.3 Hz, 1H), 6.67 (d, *J* = 8.1 Hz, 1H), 3.54 (s, 2H), 2.21 (s, 3H). <sup>13</sup>C NMR (151 MHz, Methanol-*d*<sub>4</sub>) δ 176.31, 154.34, 132.56, 129.59, 129.54, 122.47, 115.80, 36.52, 20.50. HRMS (ESI-TOF) Calcd for C<sub>9</sub>H<sub>9</sub>O<sub>3</sub> [M-H]<sup>-</sup>: 165.0552; found: 165.0554.

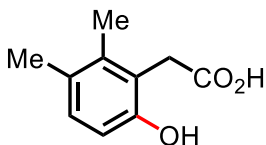

### 2-(6-hydroxy-2,3-dimethylphenyl)acetic acid (2n)

Substrate **1n** was hydroxylated following general procedure, the hydroxylated product **2n** was obtained as an ivory solid (128 mg, 71%),  $^1\text{H}$  NMR (600 MHz, Methanol- $d_4$ )  $\delta$  6.85 (d,  $J = 8.2$  Hz, 1H), 6.55 (d,  $J = 8.2$  Hz, 1H), 3.71 (s, 2H), 2.17 (s, 3H), 2.13 (s, 3H),  $^{13}\text{C}$  NMR (151 MHz, Methanol- $d_4$ )  $\delta$  176.35, 154.70, 137.49, 129.84, 128.32, 121.50, 112.93, 32.70, 20.11, 15.89. HRMS (ESI-TOF) Calcd for  $\text{C}_{10}\text{H}_{11}\text{O}_3$   $[\text{M}-\text{H}]^-$ : 179.0708; found: 179.0710.

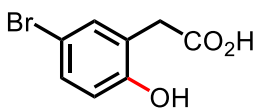

### 2-(5-bromo-2-hydroxyphenyl)acetic acid (2o)

Substrate **1o** was hydroxylated following general procedure, the hydroxylated product **2o** was obtained as a white solid (190 mg, 83%),  $^1\text{H}$  NMR (600 MHz, Methanol- $d_4$ )  $\delta$  7.26 (d,  $J = 2.6$  Hz, 1H), 7.19 (dd,  $J = 8.6, 2.6$  Hz, 1H), 6.70 (d,  $J = 8.6$  Hz, 1H), 3.56 (s, 2H),  $^{13}\text{C}$  NMR (151 MHz, Methanol- $d_4$ )  $\delta$  175.43, 156.20, 134.66, 131.88, 125.46, 117.54, 111.74, 36.09. HRMS (ESI-TOF) Calcd for  $\text{C}_8\text{H}_6\text{BrO}_3$   $[\text{M}-\text{H}]^-$ : 228.9500; found: 228.9503.

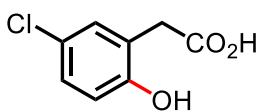

### 2-(5-chloro-2-hydroxyphenyl)acetic acid (2p)

Substrate **1p** was hydroxylated following general procedure, the hydroxylated product **2p** was obtained as a white solid (158 mg, 85%),  $^1\text{H}$  NMR (600 MHz, Methanol- $d_4$ )  $\delta$  7.12 (d,  $J = 2.6$  Hz, 1H), 7.05 (dd,  $J = 8.6, 2.7$  Hz, 1H), 6.74 (d,  $J = 8.6$  Hz, 1H), 3.56 (s, 2H),  $^{13}\text{C}$  NMR (151 MHz, Methanol- $d_4$ )  $\delta$  175.46, 155.68, 131.73, 128.86, 124.88, 124.72, 117.03, 36.17. HRMS (ESI-TOF) Calcd for  $\text{C}_8\text{H}_6\text{ClO}_3$   $[\text{M}-\text{H}]^-$ : 185.0005; found: 185.0008.

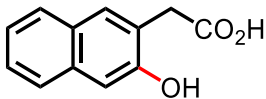

### 2-(3-hydroxynaphthalen-2-yl)acetic acid (2q)

Substrate **1q** was hydroxylated following general procedure with  $\text{KHCO}_3$  (200.2 mg, 2.0 mmol, 2.0 equiv.) and DMA (3.0 mL) instead of  $\text{CH}_3\text{CN}$  and  $\text{K}_2\text{HPO}_4$ , the hydroxylated product **2q** was obtained as a white solid (166 mg, 82%),  $^1\text{H}$  NMR (600 MHz, Methanol- $d_4$ )  $\delta$  7.68 (d,  $J = 8.2$  Hz, 1H), 7.61 (s, 1H), 7.59 (d,  $J = 7.9$  Hz, 1H), 7.33 (ddd,  $J = 8.1, 6.8, 1.3$  Hz, 1H), 7.23 (ddd,  $J = 8.1, 6.8, 1.2$  Hz, 1H), 7.10 (s, 1H), 3.75 (s, 2H).  $^{13}\text{C}$  NMR (151 MHz, Methanol- $d_4$ )  $\delta$  176.03, 155.33, 135.86, 131.05, 129.85, 128.35, 126.81, 126.72, 125.85, 123.94, 109.53, 37.18. HRMS (ESI-TOF) Calcd for  $\text{C}_{12}\text{H}_9\text{O}_3$   $[\text{M}-\text{H}]^-$ : 201.0552; found: 201.0552.

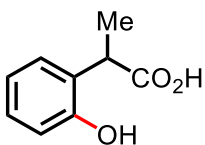

### 2-(2-hydroxyphenyl)propanoic acid (2r)

Substrate **1r** was hydroxylated following general procedure, the hydroxylated product **2r** was obtained as a colourless liquid (146 mg, 88%),  $^1\text{H}$  NMR (600 MHz, Methanol- $d_4$ )  $\delta$  7.13 (dd,  $J = 7.6, 1.7$  Hz, 1H), 7.05 (td,  $J = 7.7, 1.7$  Hz, 1H), 6.82 – 6.74 (m, 2H), 4.00 (q,  $J = 7.2$  Hz, 1H), 1.41 (d,  $J = 7.2$  Hz, 3H).  $^{13}\text{C}$  NMR (151 MHz, Methanol- $d_4$ )  $\delta$  179.44, 155.96, 129.10, 128.96, 128.83, 120.58, 116.17, 40.74, 17.70. HRMS (ESI-TOF) Calcd for  $\text{C}_9\text{H}_9\text{O}_3$   $[\text{M}-\text{H}]^-$ : 165.0552; found: 165.0552.

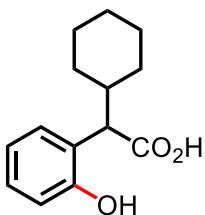

### 2-cyclohexyl-2-(2-hydroxyphenyl)acetic acid (2s)

Substrate **1s** was hydroxylated following general procedure, the hydroxylated product **2s** was obtained as a white solid (173 mg, 74%),  $^1\text{H}$  NMR (600 MHz, Methanol- $d_4$ )  $\delta$  7.27 (dd,  $J = 7.9, 1.6$  Hz, 1H), 7.04 (td,  $J = 7.7, 1.6$  Hz, 1H), 6.81 – 6.75 (m, 2H), 3.80 (d,  $J = 10.6$  Hz, 1H), 1.98 – 1.88 (m, 2H), 1.78 – 1.74 (m, 1H), 1.66 – 1.60 (m, 2H), 1.36 – 1.28 (m, 2H), 1.21 – 1.08 (m, 3H), 0.89 – 0.82 (m, 1H).  $^{13}\text{C}$  NMR (151 MHz, Methanol- $d_4$ )  $\delta$  178.57, 156.67, 129.74, 128.85, 125.77, 120.61, 116.32, 51.59, 41.75, 33.24, 31.01, 27.53, 27.21. HRMS (ESI-TOF) Calcd for  $\text{C}_{14}\text{H}_{17}\text{O}_3$   $[\text{M}-\text{H}]^-$ : 233.1178; found: 233.1185.

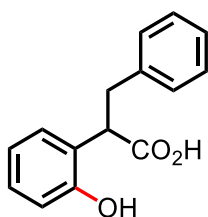

#### 2-(2-hydroxyphenyl)-3-phenylpropanoic acid (**2t**)

Substrate **1t** was hydroxylated following general procedure, the hydroxylated product **2t** was obtained as a white solid (171 mg, 71%),  $^1\text{H}$  NMR (600 MHz, Methanol- $d_4$ )  $\delta$  7.21 – 7.10 (m, 6H), 7.05 (td,  $J = 7.6, 1.6$  Hz, 1H), 6.78 (dd,  $J = 8.1, 1.4$  Hz, 1H), 6.77 – 6.72 (m, 1H), 4.25 (t,  $J = 7.6$  Hz, 1H), 3.27 – 3.23 (m, 1H), 3.04 – 2.96 (m, 1H).  $^{13}\text{C}$  NMR (151 MHz, Methanol- $d_4$ )  $\delta$  177.79, 156.10, 141.35, 130.03, 129.53, 129.09, 129.05, 127.09, 127.04, 120.46, 116.23, 48.24, 39.44. HRMS (ESI-TOF) Calcd for  $\text{C}_{15}\text{H}_{13}\text{O}_3$   $[\text{M}-\text{H}]^-$ : 241.0865; found: 241.0872.

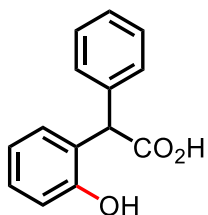

#### 2-(2-hydroxyphenyl)-2-phenylacetic acid (**2u**)

Substrate **1u** was hydroxylated following general procedure with  $\text{KHCO}_3$  (200.2 mg, 2.0 mmol, 2.0 equiv.) and DMA (3.0 mL) instead of  $\text{CH}_3\text{CN}$  and  $\text{K}_2\text{HPO}_4$ , the hydroxylated product **2u** was obtained as a white solid (135 mg, 59%),  $^1\text{H}$  NMR (600 MHz, Methanol- $d_4$ )

$\delta$  7.34 – 7.27 (m, 4H), 7.26 – 7.23 (m, 1H), 7.07 (t,  $J = 7.7$  Hz, 1H), 6.95 (d,  $J = 7.7$  Hz, 1H), 6.80 (d,  $J = 8.1$  Hz, 1H), 6.73 (t,  $J = 7.5$  Hz, 1H), 5.29 (s, 1H).  $^{13}\text{C}$  NMR (151 MHz, Methanol- $d_4$ )  $\delta$  177.02, 156.23, 139.88, 130.30, 130.12, 129.38, 129.14, 127.96, 127.49, 120.21, 115.82, 52.39. HRMS (ESI-TOF) Calcd for  $\text{C}_{14}\text{H}_{11}\text{O}_3$   $[\text{M}-\text{H}]^-$ : 227.0708; found: 227.0708.

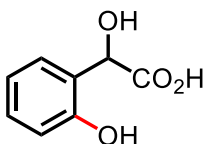

### 2-hydroxy-2-(2-hydroxyphenyl)acetic acid (2v)

Substrate **1v** was hydroxylated following general procedure, the hydroxylated product **2v** was obtained as a as viscous liquid (139 mg, 83%),  $^1\text{H}$  NMR (600 MHz, Methanol- $d_4$ )  $\delta$  7.34 (d,  $J = 7.7$  Hz, 1H), 7.18 – 7.07 (m, 1H), 6.90 – 6.73 (m, 2H), 5.39 (s, 1H).  $^{13}\text{C}$  NMR (151 MHz, MeOD)  $\delta$  177.88, 156.25, 130.08, 128.79, 127.72, 120.62, 117.00, 70.52. HRMS (ESI-TOF) Calcd for  $\text{C}_8\text{H}_7\text{O}_4$   $[\text{M}-\text{H}]^-$ : 167.0344; found: 167.0346.

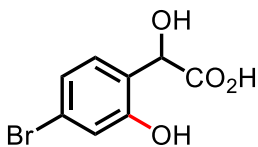

### 2-(4-bromo-2-hydroxyphenyl)-2-hydroxyacetic acid (2w)

Substrate **1w** was hydroxylated following general procedure at 60 °C, the hydroxylated product **2w** was obtained as a as viscous liquid (115 mg, 47%),  $^1\text{H}$  NMR (400 MHz, Methanol- $d_4$ )  $\delta$  7.30 (d,  $J = 8.2$  Hz, 1H), 6.98 – 6.90 (m, 2H), 5.20 (s, 1H).  $^{13}\text{C}$  NMR (151 MHz, Methanol- $d_4$ )  $\delta$  178.80, 157.27, 129.64, 127.99, 123.52, 122.53, 120.38, 70.65. HRMS (ESI-TOF) Calcd for  $\text{C}_8\text{H}_6\text{BrO}_4$   $[\text{M}-\text{H}]^-$ : 244.9449; found: 244.9455.

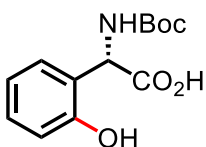

### (S)-2-((tert-butoxycarbonyl)amino)-2-(2-hydroxyphenyl)acetic acid (2x)

Substrate **1x** was hydroxylated following general procedure, the hydroxylated product **2x** was obtained as a yellow solid (155 mg, 58%),  $^1\text{H}$  NMR (600 MHz, Methanol- $d_4$ )  $\delta$  7.20 (dd,  $J = 7.8, 1.7$  Hz, 1H), 7.15 – 7.10 (m, 1H), 6.83 – 6.78 (m, 2H), 5.38 (s, 1H), 1.44 (s, 9H).  $^{13}\text{C}$  NMR (151 MHz, MeOD)  $\delta$  175.64, 157.65, 156.42, 130.23, 130.05, 128.51, 125.63, 120.63, 116.69, 80.71, 28.71. HRMS (ESI-TOF) Calcd for  $\text{C}_{13}\text{H}_{16}\text{NO}_5$   $[\text{M}-\text{H}]^-$ : 266.1034; found: 266.1034.

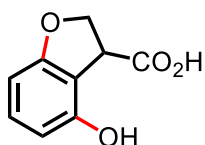

#### 4-hydroxy-2,3-dihydrobenzofuran-3-carboxylic acid (**2y**)

Substrate **1y** was hydroxylated following general procedure, the hydroxylated product **2y** was obtained as a white solid (135 mg, 75%),  $^1\text{H}$  NMR (600 MHz, Methanol- $d_4$ )  $\delta$  6.98 (t,  $J = 8.1$ , 1H), 6.33 (d,  $J = 8.1$  Hz, 1H), 6.28 (d,  $J = 7.9$  Hz, 1H), 4.70 (dd,  $J = 9.1, 6.0$  Hz, 1H), 4.64 (dd,  $J = 9.7, 9.0$  Hz, 1H), 4.33 (dd,  $J = 9.7, 6.0$  Hz, 1H).  $^{13}\text{C}$  NMR (151 MHz, Methanol- $d_4$ )  $\delta$  176.19, 163.18, 155.97, 131.25, 112.05, 109.13, 102.21, 74.80, 47.04. HRMS (ESI-TOF) Calcd for  $\text{C}_9\text{H}_7\text{O}_4$   $[\text{M}-\text{H}]^-$ : 179.0344; found: 179.0347.

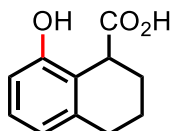

#### 8-hydroxy-1,2,3,4-tetrahydronaphthalene-1-carboxylic acid (**2z**)

Substrate **1z** was hydroxylated following general procedure, the hydroxylated product **2z** was obtained as an ivory solid (123 mg, 64%),  $^1\text{H}$  NMR (600 MHz, Methanol- $d_4$ )  $\delta$  6.95 (t,  $J = 7.8$  Hz, 1H), 6.61 – 6.55 (m, 2H), 3.80 (dd,  $J = 6.8, 4.9$  Hz, 1H), 2.81 – 2.63 (m, 2H), 2.12 – 2.06 (m, 1H), 2.04 – 1.99 (m, 1H), 1.88 – 1.81 (m, 1H), 1.76 – 1.69 (m, 1H).  $^{13}\text{C}$  NMR (151 MHz, Methanol- $d_4$ )  $\delta$  180.15, 156.71, 139.85, 128.20, 122.79, 121.15, 112.74, 41.29, 30.44, 28.49, 21.53. HRMS (ESI-TOF) Calcd for  $\text{C}_{11}\text{H}_{11}\text{O}_3$   $[\text{M}-\text{H}]^-$ : 191.0708; found: 191.0714.



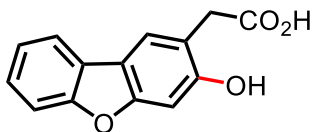

### 2-(3-hydroxydibenzo[b,d]furan-2-yl)acetic acid (**2aa**)

Substrate **1aa** was hydroxylated following general procedure with  $\text{KHCO}_3$  (200.2 mg, 2.0 mmol, 2.0 equiv.) and DMA (3.0 mL) instead of  $\text{CH}_3\text{CN}$  and  $\text{K}_2\text{HPO}_4$ , the hydroxylated product **2aa** was obtained as a white solid (160 mg, 66%),  $^1\text{H}$  NMR (600 MHz, Methanol-*d*<sub>4</sub>)  $\delta$  7.81 (dd,  $J = 7.6, 1.4$  Hz, 1H), 7.71 (s, 1H), 7.45 (d,  $J = 8.1$  Hz, 1H), 7.34 – 7.28 (m, 1H), 7.25 (td,  $J = 7.5, 1.0$  Hz, 1H), 6.98 (s, 1H), 3.72 (s, 2H).  $^{13}\text{C}$  NMR (151 MHz, Methanol-*d*<sub>4</sub>)  $\delta$  176.42, 158.04, 157.48, 157.23, 126.41, 125.84, 123.72, 123.44, 120.51, 119.40, 117.18, 111.97, 98.54, 36.81. HRMS (ESI-TOF) Calcd for  $\text{C}_{14}\text{H}_9\text{O}_4$   $[\text{M}-\text{H}]^-$ : 241.0501; found: 241.0503.

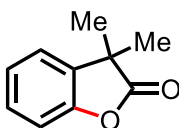

Compound **2ab** easily converts into the corresponding lactone during work-up and purification. The isolated yield is based on the lactone **2ab'** after following the procedure below. Procedure: Upon completion of C–H hydroxylation, 0.5 mL concentrated sulfuric acid was added to the reaction mixture and stirred for 2h. The solution was quenched with saturated solution of  $\text{Na}_2\text{SO}_3$  in water. The mixture was filtered through Celite, and the aqueous layer was extracted with ethyl acetate three times. The combined organic layers were dried over anhydrous  $\text{Na}_2\text{SO}_4$  and concentrated under vacuum. The crude mixture was purified by flash chromatography affording the product as colourless liquid, 130 mg, 80%. (Hexane/EtOAc = 10/1, v/v).

### 3,3-dimethylbenzofuran-2(3H)-one (**2ab'**)

$^1\text{H}$  NMR (600 MHz, Chloroform-*d*)  $\delta$  7.38 (td,  $J = 7.8, 1.5$  Hz, 1H), 7.31 (dd,  $J = 7.4, 1.4$  Hz, 1H), 7.25 (td,  $J = 7.5, 1.0$  Hz, 1H), 7.21 (dt,  $J = 7.9, 0.8$  Hz, 1H), 1.59 (s, 6H).  $^{13}\text{C}$  NMR (151 MHz, Chloroform-*d*)  $\delta$  181.07, 152.37, 133.82, 128.66, 124.40, 122.86, 110.96, 43.03, 25.40. The NMR data matches the reported data<sup>4</sup>.

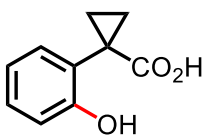

### 1-(2-hydroxyphenyl)cyclopropane-1-carboxylic acid (**2ac**)

Substrate **1ac** was hydroxylated following general procedure, the hydroxylated product **2ac** was obtained as a colourless oil (139 mg, 78%),  $^1\text{H}$  NMR (600 MHz, Methanol- $d_4$ )  $\delta$  7.14 (dd,  $J = 7.4, 1.7$  Hz, 1H), 7.07 (td,  $J = 7.7, 1.7$  Hz, 1H), 6.75 (m, 2H), 1.56 (q,  $J = 4.1$  Hz, 2H), 1.11 (q,  $J = 4.0$  Hz, 2H).  $^{13}\text{C}$  NMR (151 MHz, Methanol- $d_4$ )  $\delta$  178.73, 158.20, 131.85, 129.33, 127.74, 120.11, 116.03, 25.74, 17.19. HRMS (ESI-TOF) Calcd for  $\text{C}_{10}\text{H}_9\text{O}_3$   $[\text{M}-\text{H}]^-$ : 177.0552; found: 177.0550.

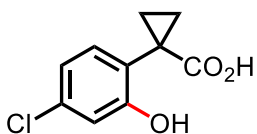

### 1-(4-chloro-2-hydroxyphenyl)cyclopropane-1-carboxylic acid (**2ad**)

Substrate **1ad** was hydroxylated following general procedure, the hydroxylated product **2ad** was obtained as a yellow solid (119 mg, 56%),  $^1\text{H}$  NMR (600 MHz, Methanol- $d_4$ )  $\delta$  7.10 (d,  $J = 8.1$  Hz, 1H), 6.78 (d,  $J = 2.1$  Hz, 1H), 6.75 (dd,  $J = 8.1, 2.1$  Hz, 1H), 1.57 – 1.53 (m, 2H), 1.11 – 1.07 (m, 2H).  $^{13}\text{C}$  NMR (151 MHz, MeOD)  $\delta$  178.38, 159.25, 134.28, 132.92, 127.02, 119.90, 116.07, 25.43, 17.06. HRMS (ESI-TOF) Calcd for  $\text{C}_{10}\text{H}_8\text{ClO}_3$   $[\text{M}-\text{H}]^-$ : 211.0162; found: 211.0157.

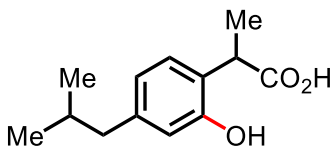

### 2-(2-hydroxy-4-isobutylphenyl)propanoic acid (**2ae**)

Substrate **1ae** was hydroxylated following general procedure, the hydroxylated product **2ae** was obtained as a white solid (195 mg, 88%),  $^1\text{H}$  NMR (600 MHz, Chloroform- $d$ )  $\delta$  7.06 (d,  $J = 7.8$  Hz, 1H), 6.71 (dd,  $J = 7.7, 1.7$  Hz, 1H), 6.67 (d,  $J = 1.7$  Hz, 1H), 3.93 (q,  $J = 7.2$  Hz,

1H), 2.40 (d,  $J = 7.2$  Hz, 2H), 1.85 – 1.81 (m, 1H), 1.55 (d,  $J = 7.3$  Hz, 3H), 0.89 (d,  $J = 6.7$  Hz, 6H).  $^{13}\text{C}$  NMR (151 MHz, Chloroform- $d$ )  $\delta$  182.11, 153.79, 143.13, 128.34, 122.83, 122.20, 118.02, 45.08, 40.84, 30.15, 22.55, 16.14. HRMS (ESI-TOF) Calcd for  $\text{C}_{13}\text{H}_{17}\text{O}_3$   $[\text{M}-\text{H}]^-$ : 221.1178; found: 221.1179.

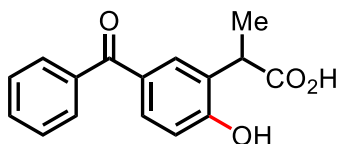

### 2-(5-benzoyl-2-hydroxyphenyl)propanoic acid (2af)

Substrate **1af** was hydroxylated following general procedure, the hydroxylated product **2af** was obtained as a white solid (151 mg, 56%),  $^1\text{H}$  NMR (600 MHz, Methanol- $d_4$ )  $\delta$  7.75 – 7.67 (m, 3H), 7.63 – 7.58 (m, 2H), 7.54 – 7.48 (m, 2H), 6.90 (d,  $J = 8.4$  Hz, 1H), 4.05 (q,  $J = 7.2$  Hz, 1H), 1.44 (d,  $J = 7.2$  Hz, 3H).  $^{13}\text{C}$  NMR (151 MHz, Methanol- $d_4$ )  $\delta$  197.81, 178.56, 161.20, 139.75, 133.12, 132.49, 132.33, 130.65, 129.88, 129.51, 129.37, 115.69, 40.53, 17.46. HRMS (ESI-TOF) Calcd for  $\text{C}_{16}\text{H}_{13}\text{O}_4$   $[\text{M}-\text{H}]^-$ : 269.0814; found: 269.0813.

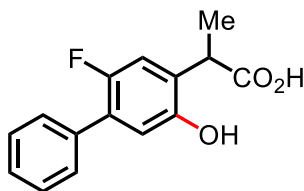

### 2-(2-fluoro-5-hydroxy-[1,1'-biphenyl]-4-yl)propanoic acid (2ag)

Substrate **1ag** was hydroxylated following general procedure, the hydroxylated product **2ag** was obtained as a pale-yellow solid (174 mg, 67%),  $^1\text{H}$  NMR (600 MHz, Methanol- $d_4$ )  $\delta$  7.49 (d,  $J = 7.3$  Hz, 2H), 7.41 (t,  $J = 7.8$  Hz, 2H), 7.36 – 7.29 (m, 1H), 6.99 (d,  $J = 11.6$  Hz, 1H), 6.85 (d,  $J = 6.8$  Hz, 1H), 4.03 (q,  $J = 7.2$  Hz, 1H), 1.46 (d,  $J = 7.2$  Hz, 3H).  $^{13}\text{C}$  NMR (151 MHz, Methanol- $d_4$ )  $\delta$  178.54, 154.50 (d,  $J = 237.7$  Hz), 152.24 (d,  $J = 2.1$  Hz), 137.25, 129.95 (d,  $J = 7.2$  Hz), 129.86 (d,  $J = 2.9$  Hz), 129.40, 128.95 (d,  $J = 14.9$  Hz), 128.57, 117.13 (d,  $J = 3.5$  Hz), 116.29 (d,  $J = 25.2$  Hz), 40.28, 17.62.  $^{19}\text{F}$  NMR (376 MHz, Methanol- $d_4$ )  $\delta$  -134.88. HRMS (ESI-TOF) Calcd for  $\text{C}_{15}\text{H}_{12}\text{FO}_3$   $[\text{M}-\text{H}]^-$ : 259.0770; found: 259.0769.

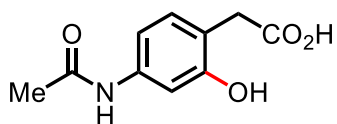

### 2-(4-acetamido-2-hydroxyphenyl)acetic acid (2ah)

Substrate **1ah** was hydroxylated following general procedure with  $\text{KHCO}_3$  (200.2 mg, 2.0 mmol, 2.0 equiv.) and DMA (3.0 mL) instead of  $\text{CH}_3\text{CN}$  and  $\text{K}_2\text{HPO}_4$ , the hydroxylated product **2ah** was obtained as an ivory solid (140 mg, 67%),  $^1\text{H}$  NMR (600 MHz, Methanol- $d_4$ )  $\delta$  7.25 (d,  $J = 2.1$  Hz, 1H), 7.03 (d,  $J = 8.1$  Hz, 1H), 6.83 (dd,  $J = 8.1, 2.1$  Hz, 1H), 3.53 (s, 2H), 2.08 (s, 3H).  $^{13}\text{C}$  NMR (151 MHz, Methanol- $d_4$ )  $\delta$  176.39, 171.55, 156.92, 139.83, 131.98, 118.82, 112.06, 108.17, 36.29, 23.80. HRMS (ESI-TOF) Calcd for  $\text{C}_{10}\text{H}_{10}\text{NO}_4$   $[\text{M}-\text{H}]^-$ : 208.0610; found: 208.0609.

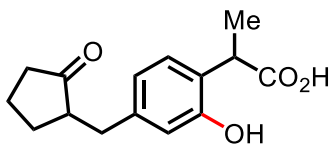

### 2-(2-hydroxy-4-((2-oxocyclopentyl)methyl)phenyl)propanoic acid (2ai)

Substrate **1ai** was hydroxylated following general procedure, the hydroxylated product **2ai** was obtained as a yellow oil (197 mg, 75%),  $^1\text{H}$  NMR (600 MHz, Methanol- $d_4$ )  $\delta$  7.04 (d,  $J = 8.3$  Hz, 1H), 6.65 – 6.58 (m, 2H), 3.97 (q,  $J = 7.2$  Hz, 1H), 2.98 – 2.94 (m, 1H), 2.47 – 2.42 (m, 1H), 2.39 – 2.25 (m, 2H), 2.12 – 2.03 (m, 2H), 1.96 – 1.91 (m, 1H), 1.79 – 1.70 (m, 1H), 1.60 – 1.53 (m, 1H), 1.39 (d,  $J = 7.2$  Hz, 3H).  $^{13}\text{C}$  NMR (151 MHz, Methanol- $d_4$ )  $\delta$  222.98, 179.31, 155.85, 141.17, 128.87, 126.89, 121.19, 116.56, 52.04, 40.16, 39.03, 36.17, 30.08, 21.45, 17.72. HRMS (ESI-TOF) Calcd for  $\text{C}_{15}\text{H}_{17}\text{O}_4$   $[\text{M}-\text{H}]^-$ : 261.1127; found: 261.1129.

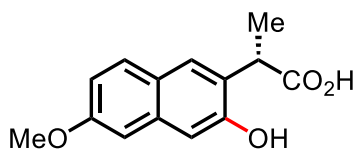

### (S)-2-(3-hydroxy-6-methoxynaphthalen-2-yl)propanoic acid (2aj)

Substrate **1aj** was hydroxylated following general procedure, the hydroxylated product **2aj** was obtained as an orange solid (160 mg, 65%) with  $\text{KHCO}_3$  (200.2 mg, 2.0 mmol, 2.0 equiv.) and DMA (3.0 mL) instead of  $\text{CH}_3\text{CN}$  and  $\text{K}_2\text{HPO}_4$ ,  $^1\text{H}$  NMR (600 MHz, Methanol- $d_4$ )  $\delta$  7.57 (d,  $J = 8.9$  Hz, 1H), 7.53 (s, 1H), 7.03 (s, 1H), 6.97 (d,  $J = 2.5$  Hz, 1H), 6.88 (dd,  $J = 8.9, 2.5$  Hz, 1H), 4.09 (q,  $J = 7.2$  Hz, 1H), 3.84 (s, 3H), 1.52 (d,  $J = 7.2$  Hz, 3H).  $^{13}\text{C}$  NMR (151 MHz, Methanol- $d_4$ )  $\delta$  179.32, 159.32, 155.24, 136.73, 129.97, 129.22, 127.84, 125.26, 116.47, 109.27, 105.03, 55.57, 40.99, 17.74. HRMS (ESI-TOF) Calcd for  $\text{C}_{14}\text{H}_{13}\text{O}_4$   $[\text{M-H}]^-$ : 245.0814; found: 245.0817.

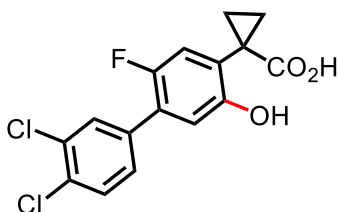

**1-(3',4'-dichloro-2-fluoro-5-hydroxy-[1,1'-biphenyl]-4-yl)cyclopropane-1-carboxylic acid (2ak)**

Substrate **1ak** was hydroxylated following general procedure on 0.5 mmol scale, the hydroxylated product **2ak** was obtained as a white solid (126 mg, 74%),  $^1\text{H}$  NMR (600 MHz, Methanol- $d_4$ )  $\delta$  7.64 (dd,  $J = 2.0, 1.3$  Hz, 1H), 7.55 (d,  $J = 8.3$  Hz, 1H), 7.42 (dt,  $J = 8.3, 1.6$  Hz, 1H), 7.00 (d,  $J = 11.2$  Hz, 1H), 6.82 (d,  $J = 6.7$  Hz, 1H), 1.62 – 1.55 (m, 2H), 1.18 – 1.11 (m, 2H).  $^{13}\text{C}$  NMR (151 MHz, Methanol- $d_4$ )  $\delta$  178.01, 154.83, 153.82 (d,  $J = 238.4$  Hz), 137.55, 133.29, 132.52, 131.61 (d,  $J = 3.8$  Hz), 131.54, 130.15 (d,  $J = 7.6$  Hz), 129.62 (d,  $J = 3.3$  Hz), 126.73 (d,  $J = 14.8$  Hz), 119.18 (d,  $J = 24.8$  Hz), 116.76 (d,  $J = 2.7$  Hz), 26.00, 17.09. HRMS (ESI-TOF) Calcd for  $\text{C}_{16}\text{H}_{10}\text{Cl}_2\text{FO}_3$   $[\text{M-H}]^-$ : 338.9991; found: 338.9992.

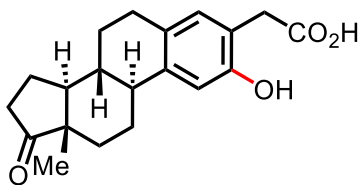

(2al)

Substrate **1a** was hydroxylated following general procedure on 0.5 mmol scale, the hydroxylated product **2a** was obtained as a white solid (128 mg, 78%), <sup>1</sup>H NMR (600 MHz, Chloroform-*d*) δ 6.86 (s, 1H), 6.84 (s, 1H), 3.64 (s, 2H), 2.85 – 2.79 (m, 2H), 2.55 – 2.48 (m, 1H), 2.34 – 2.11 (m, 3H), 2.07 – 1.92 (m, 3H), 1.66 – 1.36 (m, 6H), 0.89 (s, 3H). <sup>13</sup>C NMR (151 MHz, Chloroform-*d*) δ 221.65, 178.28, 152.52, 141.06, 131.63, 129.12, 118.02, 114.07, 50.59, 48.17, 44.45, 38.11, 36.77, 36.03, 31.66, 28.54, 26.71, 25.80, 21.72, 13.95. HRMS (ESI-TOF) Calcd for C<sub>20</sub>H<sub>23</sub>O<sub>4</sub> [M-H]<sup>-</sup>: 327.1596; found: 327.1602.

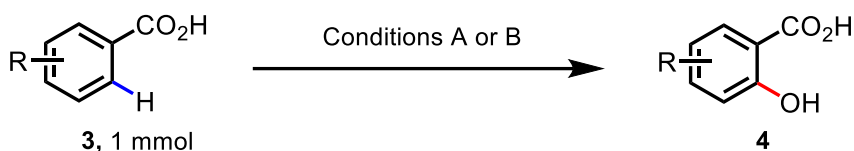

### General Procedure for hydroxylation of benzoic acids

**Conditions A:** Pd(OAc)<sub>2</sub> (4.5 mg, 0.02 mmol, 2 mol%), **L4** (7.3 mg, 0.04 mmol, 4 mol%), carboxylic acid **3** (1.0 mmol), and K<sub>2</sub>HPO<sub>4</sub>•3H<sub>2</sub>O (342.3 mg, 1.5 mmol, 1.5 equiv.) were weighed and placed in an 8 mL vial. Then, CH<sub>3</sub>CN (3.0 mL) was added and stirred for 10 min, followed by the addition of H<sub>2</sub>O<sub>2</sub> (35% aq., 300 uL, 3.5 equiv.). The vial was sealed with a screw cap and stirred at room temperature for 24 h (typically ran at 25 °C unless otherwise noted). Upon completion, the reaction was quenched with saturated solution of Na<sub>2</sub>SO<sub>3</sub> (or Na<sub>2</sub>S<sub>2</sub>O<sub>3</sub>) in water until H<sub>2</sub>O<sub>2</sub> was completely decomposed. (Tested by the potassium iodide starch test paper). The mixture was diluted with methanol and acidified with formic acid. The solution was filtered through a pad of Celite, and the aqueous layer was extracted with ethyl acetate three times. The combined organic layers were dried over anhydrous Na<sub>2</sub>SO<sub>4</sub> and concentrated under vacuum. The crude mixture was purified by flash chromatography (Hexane/EtOAc or DCM/MeOH with 1% AcOH, v/v).

**Conditions B:** Pd(OAc)<sub>2</sub> (11.0 mg, 0.05 mmol, 5 mol%), **L4** (18.2 mg, 0.10 mmol, 10 mol%), carboxylic acid **3** (1.0 mmol), and CsOAc (288.0 mg, 1.5 mmol, 1.5 equiv.) were weighed and placed in a reaction tube. Then, DMA (3.0 mL) was added and stirred for 10 min, followed by the addition of H<sub>2</sub>O<sub>2</sub> (35% aq., 300 uL, 3.0 equiv.). The vial was sealed with a

screw cap and stirred at 60 °C for 24 h. Upon completion, the reaction was quenched with saturated solution of Na<sub>2</sub>SO<sub>3</sub> (or Na<sub>2</sub>S<sub>2</sub>O<sub>3</sub>) in water until H<sub>2</sub>O<sub>2</sub> was completely decomposed. (Tested by the potassium iodide starch test paper). The mixture was diluted with methanol and acidified with formic acid. The solution was filtered through a pad of Celite, and the aqueous layer was extracted with ethyl acetate three times. The combined organic layers were dried over anhydrous Na<sub>2</sub>SO<sub>4</sub> and concentrated under vacuum. The crude mixture was purified by flash chromatography (Hexane/EtOAc or DCM/MeOH with 1% AcOH, v/v).

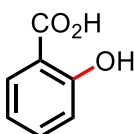

#### 2-hydroxybenzoic acid (4a)

Substrate **3a** was hydroxylated following general procedure conditions A, the hydroxylated product **4a** was obtained as a white solid (130 mg, 94%), <sup>1</sup>H NMR (600 MHz, Methanol-*d*<sub>4</sub>) δ 7.85 (dd, *J* = 7.9, 1.6 Hz, 1H), 7.46 (ddd, *J* = 8.3, 7.2, 1.7 Hz, 1H), 6.94 – 6.85 (m, 2H). <sup>13</sup>C NMR (151 MHz, Methanol-*d*<sub>4</sub>) δ 173.51, 163.22, 136.60, 131.53, 120.04, 118.14, 113.88. HRMS (ESI-TOF) Calcd for C<sub>7</sub>H<sub>5</sub>O<sub>3</sub> [M-H]<sup>-</sup>: 137.0244; found: 137.0240.

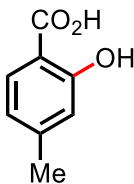

#### 2-hydroxy-4-methylbenzoic acid (4b)

Substrate **3b** was hydroxylated following general procedure conditions A, the hydroxylated product **4b** was obtained as an ivory solid (140 mg, 92%), <sup>1</sup>H NMR (600 MHz, Methanol-*d*<sub>4</sub>) δ 7.72 (d, *J* = 8.0 Hz, 1H), 6.75 – 6.73 (m, 1H), 6.73 – 6.70 (m, 1H), 2.33 (s, 3H). <sup>13</sup>C NMR (151 MHz, Methanol-*d*<sub>4</sub>) δ 173.54, 163.14, 148.11, 131.37, 121.26, 118.22, 111.30, 21.79. HRMS (ESI-TOF) Calcd for C<sub>8</sub>H<sub>7</sub>O<sub>3</sub> [M-H]<sup>-</sup>: 151.0395; found: 151.0399.

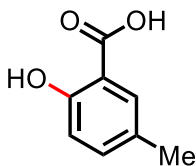

#### 2-hydroxy-5-methylbenzoic acid (4c)

Substrate **3c** was hydroxylated following general procedure conditions A, the hydroxylated product **4c** was obtained as a white solid (130 mg, 85%),  $^1\text{H}$  NMR (600 MHz, Methanol- $d_4$ )  $\delta$  7.64 (dd,  $J = 2.3, 0.9$  Hz, 1H), 7.26 (ddd,  $J = 8.3, 2.3, 0.6$  Hz, 1H), 6.80 (d,  $J = 8.4$  Hz, 1H), 2.25 (s, 3H).  $^{13}\text{C}$  NMR (151 MHz, Methanol- $d_4$ )  $\delta$  173.50, 161.04, 137.42, 131.19, 129.35, 117.93, 113.42, 20.36 HRMS (ESI-TOF) Calcd for  $\text{C}_8\text{H}_7\text{O}_3$   $[\text{M}-\text{H}]^-$ : 151.0395; found: 151.0399.

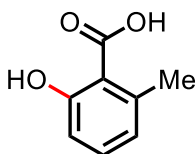

#### 2-hydroxy-6-methylbenzoic acid (4d)

Substrate **3d** was hydroxylated following general procedure conditions A, the hydroxylated product **4d** was obtained as white solid (99.3 mg, 65%),  $^1\text{H}$  NMR (600 MHz, Methanol- $d_4$ )  $\delta$  7.23 (dd,  $J = 8.3, 7.5$  Hz, 1H), 6.76 – 6.70 (m, 2H), 2.54 (s, 3H).  $^{13}\text{C}$  NMR (151 MHz, Methanol- $d_4$ )  $\delta$  174.86, 163.32, 142.45, 134.43, 123.44, 115.86, 115.07, 23.48. HRMS (ESI-TOF) Calcd for  $\text{C}_8\text{H}_7\text{O}_3$   $[\text{M}-\text{H}]^-$ : 151.0395; found: 151.0395.

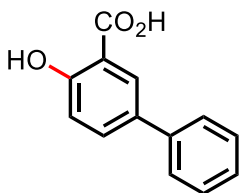

#### 4-hydroxy-[1,1'-biphenyl]-3-carboxylic acid (4e)

Substrate **3e** was hydroxylated following general procedure conditions A, the hydroxylated product **4e** was obtained as a yellow solid (191 mg, 89%),  $^1\text{H}$  NMR (600 MHz, Methanol- $d_4$ )  $\delta$  8.09 (d,  $J = 2.4$  Hz, 1H), 7.74 (dt,  $J = 8.5, 2.2$  Hz, 1H), 7.57 – 7.53 (m, 2H), 7.44 – 7.39 (m,



2H), 7.34 – 7.26 (m, 1H), 7.01 (dd,  $J = 8.6, 2.1$  Hz, 1H).  $^{13}\text{C}$  NMR (151 MHz, Methanol- $d_4$ )  $\delta$  173.33, 162.64, 141.28, 135.15, 133.59, 129.91, 129.54, 128.02, 127.47, 118.75, 114.21. HRMS (ESI-TOF) Calcd for  $\text{C}_{13}\text{H}_9\text{O}_3$   $[\text{M}-\text{H}]^-$ : 213.0552; found: 213.0555.

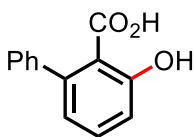

### 3-hydroxy-[1,1'-biphenyl]-2-carboxylic acid (4f)

Substrate **3f** was hydroxylated following general procedure conditions A, the hydroxylated product **4f** was obtained as a white solid (198 mg, 92%),  $^1\text{H}$  NMR (600 MHz, Methanol- $d_4$ )  $\delta$  7.35 – 7.26 (m, 6H), 6.91 (dd,  $J = 8.3, 1.1$  Hz, 1H), 6.77 (dd,  $J = 7.5, 1.1$  Hz, 1H).  $^{13}\text{C}$  NMR (151 MHz, Methanol- $d_4$ )  $\delta$  173.41, 159.78, 144.81, 143.20, 133.07, 129.37, 128.81, 128.02, 122.80, 117.72, 116.47. HRMS (ESI-TOF) Calcd for  $\text{C}_{13}\text{H}_9\text{O}_3$   $[\text{M}-\text{H}]^-$ : 213.0552; found: 213.0553.

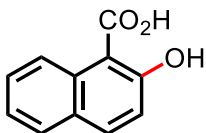

### 2-hydroxy-1-naphthoic acid (4g)

General procedure following conditions A, the hydroxylated product **4g** was obtained as a white solid (172 mg, 91%),  $^1\text{H}$  NMR (600 MHz, Methanol- $d_4$ )  $\delta$  8.86 (dd,  $J = 8.8, 1.0$  Hz, 1H), 7.92 (d,  $J = 9.0$  Hz, 1H), 7.75 (dd,  $J = 8.1, 1.5$  Hz, 1H), 7.51 (dd,  $J = 8.6, 6.9, 1.5$  Hz, 1H), 7.33 (ddd,  $J = 8.0, 6.8, 1.1$  Hz, 1H), 7.11 (d,  $J = 9.0$  Hz, 1H).  $^{13}\text{C}$  NMR (151 MHz, Methanol- $d_4$ )  $\delta$  175.34, 165.31, 137.51, 133.63, 130.04, 129.93, 129.19, 126.49, 124.50, 119.95, 106.10. HRMS (ESI-TOF) Calcd for  $\text{C}_{11}\text{H}_7\text{O}_3$   $[\text{M}-\text{H}]^-$ : 187.0395; found: 187.0398.

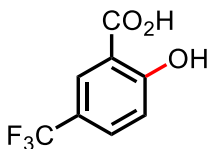

### 2-hydroxy-5-(trifluoromethyl)benzoic acid (4h)

Substrate **3h** was hydroxylated following general procedure conditions A but under 60 °C, the hydroxylated product **4h** was obtained as an ivory solid (167 mg, 81%), <sup>1</sup>H NMR (600 MHz, Methanol-*d*<sub>4</sub>) δ 8.12 (dd, *J* = 2.4, 1.0 Hz, 1H), 7.73 (ddd, *J* = 8.8, 2.4, 0.7 Hz, 1H), 7.09 (dd, *J* = 8.8, 0.8 Hz, 1H). <sup>13</sup>C NMR (151 MHz, Methanol-*d*<sub>4</sub>) δ 172.42, 165.75, 132.96 (q, *J* = 3.5 Hz), 128.96 (q, *J* = 4.2 Hz), 125.45 (q, *J* = 270.2 Hz), 122.32 (q, *J* = 33.1 Hz), 119.30, 114.17. <sup>19</sup>F NMR (376 MHz, Methanol-*d*<sub>4</sub>) δ -65.77. HRMS (ESI-TOF) Calcd for C<sub>8</sub>H<sub>4</sub>F<sub>3</sub>O<sub>3</sub> [M-H]<sup>-</sup>: 205.0113; found: 205.0114.

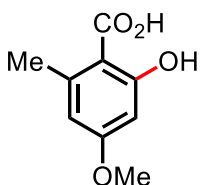

### 2-hydroxy-4-methoxy-6-methylbenzoic acid (4i)

Substrate **3i** was hydroxylated following general procedure conditions A, the hydroxylated product **4i** was obtained as a yellow solid (127 mg, 70%), <sup>1</sup>H NMR (600 MHz, Methanol-*d*<sub>4</sub>) δ 6.34 – 6.30 (m, 2H), 3.80 (s, 3H), 2.54 (s, 3H). <sup>13</sup>C NMR (151 MHz, Methanol-*d*<sub>4</sub>) δ 174.96, 166.99, 165.37, 144.90, 111.46, 106.46, 99.61, 55.74, 24.29. HRMS (ESI-TOF) Calcd for C<sub>9</sub>H<sub>9</sub>O<sub>4</sub> [M-H]<sup>-</sup>: 181.0501; found: 181.0505.

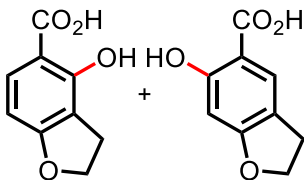

### 4-hydroxy-2,3-dihydrobenzofuran-5-carboxylic (4j, left)

### 6-hydroxy-2,3-dihydrobenzofuran-5-carboxylic acid (4j', right)

Substrate **3j** was hydroxylated following general procedure conditions A, the hydroxylated products **4j** and **4j'** were obtained as inseparable mixture (1:1), (140 mg, 78%), <sup>1</sup>H NMR (600 MHz, Methanol-*d*<sub>4</sub>) δ 7.70 – 7.66 (m, 1H), 7.66 – 7.63 (m, 1H), 6.33 – 6.28 (m, 1H), 6.24 (d, *J* = 1.9 Hz, 1H), 4.66 – 4.62 (m, 2H), 4.61 – 4.57 (m, 2H), 3.16 – 3.08 (m, 4H). <sup>13</sup>C

NMR (151 MHz, Methanol- $d_4$ )  $\delta$  173.46, 168.10, 167.78, 165.48, 160.69, 146.79, 133.11, 127.41, 120.30, 113.99, 107.68, 102.62, 98.21, 73.87, 73.81, 29.04, 27.09. (Peaks for –COOH are overlapped.) HRMS (ESI-TOF) Calcd for  $C_9H_7O_4$   $[M-H]^-$ : 179.0344; found: 179.0346.

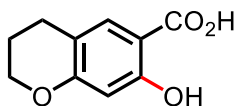

#### 7-hydroxychromane-6-carboxylic acid (**4k**)

Substrate **3k** was hydroxylated following general procedure conditions A, the hydroxylated product **4k** was obtained as a brown solid (183 mg, 94%),  $^1H$  NMR (600 MHz, Methanol- $d_4$ )  $\delta$  7.55 (t,  $J$  = 1.1 Hz, 1H), 6.22 (s, 1H), 4.34 – 3.98 (m, 2H), 2.85 – 2.49 (m, 2H), 2.11 – 1.82 (m, 2H).  $^{13}C$  NMR (151 MHz, Methanol- $d_4$ )  $\delta$  173.34, 162.89, 162.37, 132.93, 115.48, 106.85, 104.33, 68.07, 25.15, 23.40. HRMS (ESI-TOF) Calcd for  $C_{10}H_9O_4$   $[M-H]^-$ : 193.0501; found: 193.0500.

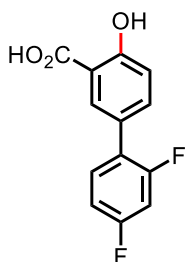

#### 2',4'-difluoro-4-hydroxy-[1,1'-biphenyl]-3-carboxylic acid (**4l**)

Substrate **3l** was hydroxylated following general procedure conditions A but under 60°C, the hydroxylated product **4l** was obtained as a yellow solid (241 mg, 96%),  $^1H$  NMR (600 MHz, Methanol- $d_4$ )  $\delta$  7.99 (s, 1H), 7.62 (d,  $J$  = 8.6 Hz, 1H), 7.47 (td,  $J$  = 8.3, 5.9 Hz, 1H), 7.07 – 6.98 (m, 3H).  $^{13}C$  NMR (151 MHz, Methanol- $d_4$ )  $\delta$  172.76, 164.44 (dd,  $J$  = 247.6, 12.0 Hz), 162.98, 161.06 (dd,  $J$  = 248.7, 12.1 Hz), 137.01, 132.55 (d,  $J$  = 9.3 Hz), 132.51 (d,  $J$  = 9.6 Hz), 131.86, 127.14, 125.63 (dd,  $J$  = 13.6, 3.9 Hz), 118.57, 112.71 (dd,  $J$  = 21.4, 3.8 Hz), 105.13 (dd,  $J$  = 27.0, 25.8 Hz).  $^{19}F$  NMR (376 MHz, Methanol- $d_4$ )  $\delta$  -113.68 (d,  $J$  = 6.8 Hz),

-115.69 (d,  $J = 7.3$  Hz). HRMS (ESI-TOF) Calcd for  $C_{13}H_7F_2O_3$   $[M-H]^-$ : 249.0363; found: 249.0365.

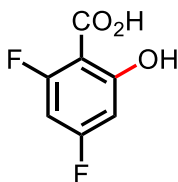

#### 2,4-difluoro-6-hydroxybenzoic acid (4m)

Substrate **3m** was hydroxylated following general procedure conditions **B**, the hydroxylated product **4m** was obtained as a white solid (126 mg, 72%),  $^1H$  NMR (600 MHz, Methanol- $d_4$ )  $\delta$  6.52 – 6.45 (m, 2H).  $^{13}C$  NMR (151 MHz, Methanol- $d_4$ )  $\delta$  171.60 (d,  $J = 3.6$  Hz), 167.79 (dd,  $J = 251.0, 15.5$  Hz), 166.21 (dd,  $J = 16.5, 6.1$  Hz), 165.19 (dd,  $J = 261.6, 17.2$  Hz), 101.20 (dd,  $J = 13.5, 3.5$  Hz), 101.03 (dd,  $J = 24.4, 4.4$  Hz), 97.24 – 96.59 (m).  $^{19}F$  NMR NMR (376 MHz, Methanol- $d_4$ )  $\delta$  -102.64 (d,  $J = 12.7$  Hz), -102.82 (d,  $J = 12.7$  Hz). HRMS (ESI-TOF) Calcd for  $C_7H_3F_2O_3$   $[M-H]^-$ : 173.0050; found: 173.0054.

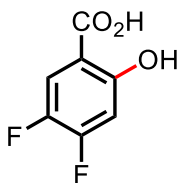

#### 4,5-difluoro-2-hydroxybenzoic acid (4n)

Substrate **3n** was hydroxylated following general procedure conditions **B**, the hydroxylated product **4n** was obtained as an ivory solid (128 mg, 73%),  $^1H$  NMR (600 MHz, Methanol- $d_4$ )  $\delta$  7.72 – 7.65 (m, 1H), 6.87 – 6.79 (m, 1H).  $^{13}C$  NMR (151 MHz, Methanol- $d_4$ )  $\delta$  171.97, 160.70 (dd,  $J = 11.8, 1.7$  Hz), 156.11 (dd,  $J = 254.6, 14.3$  Hz), 144.63 (dd,  $J = 240.2, 13.4$  Hz), 118.84 (dd,  $J = 19.5, 2.6$  Hz), 110.02, 106.78 (d,  $J = 20.3$  Hz).  $^{19}F$  NMR (376 MHz, Methanol- $d_4$ )  $\delta$  -128.80 (d,  $J = 21.8$  Hz), -151.10 (d,  $J = 21.7$  Hz). HRMS (ESI-TOF) Calcd for  $C_7H_3F_2O_3$   $[M-H]^-$ : 173.0050; found: 173.0054.

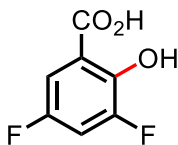

#### 3,5-difluoro-2-hydroxybenzoic acid (4o)

Substrate **3o** was hydroxylated following general procedure conditions **B**, the hydroxylated product **4o** was obtained as a pink solid (113 mg, 65%),  $^1\text{H}$  NMR (600 MHz, Methanol- $d_4$ )  $\delta$  7.38 (ddd,  $J = 8.7, 3.1, 2.0$  Hz, 1H), 7.25 (ddd,  $J = 11.3, 8.3, 3.1$  Hz, 1H).  $^{13}\text{C}$  NMR (151 MHz, Methanol- $d_4$ )  $\delta$  171.83, 154.95 (dd,  $J = 238.8, 10.5$  Hz), 152.53 (d,  $J = 247.5$  Hz), 148.38 (d,  $J = 12.5$  Hz), 116.85, 111.73 (d,  $J = 23.8$  Hz), 110.88 (dd,  $J = 27.6, 21.9$  Hz).  $^{19}\text{F}$  NMR (376 MHz, Methanol- $d_4$ )  $\delta$  -124.23, -134.42. HRMS (ESI-TOF) Calcd for  $\text{C}_7\text{H}_3\text{F}_2\text{O}_3$   $[\text{M}-\text{H}]^-$ : 173.0050; found: 173.0048.

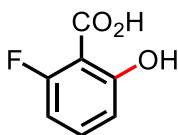

#### 2-fluoro-6-hydroxybenzoic acid (4p)

Substrate **3p** was hydroxylated following general procedure conditions **B**, the hydroxylated product **4p** was obtained as a yellow solid (96.2 mg, 62%),  $^1\text{H}$  NMR (600 MHz, Methanol- $d_4$ )  $\delta$  7.40 (td,  $J = 8.5, 6.0$  Hz, 1H), 6.74 (dt,  $J = 8.5, 1.0$  Hz, 1H), 6.62 (ddd,  $J = 10.9, 8.2, 1.0$  Hz, 1H).  $^{13}\text{C}$  NMR (151 MHz, Methanol- $d_4$ )  $\delta$  171.72, 164.40, 163.93 (d,  $J = 258.8$  Hz), 136.16, 136.08, 113.96, 107.58 (d,  $J = 23.5$  Hz).  $^{19}\text{F}$  NMR (376 MHz, Methanol- $d_4$ )  $\delta$  -107.63. HRMS (ESI-TOF) Calcd for  $\text{C}_7\text{H}_4\text{FO}_3$   $[\text{M}-\text{H}]^-$ : 155.0144; found: 155.0147.

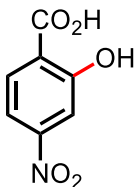

#### 2-hydroxy-4-nitrobenzoic acid (4q)

Substrate **3q** was hydroxylated following general procedure conditions **B**, the hydroxylated product **4q** was obtained as a yellow solid, (136 mg, 74%),  $^1\text{H}$  NMR (600 MHz, Methanol-

$d_4$ )  $\delta$  8.09 (dd,  $J = 8.6, 0.5$  Hz, 1H), 7.74 – 7.69 (m, 2H).  $^{13}\text{C}$  NMR (151 MHz, Methanol- $d_4$ )  $\delta$  172.06, 163.45, 153.41, 133.04, 119.19, 114.29, 113.19. HRMS (ESI-TOF) Calcd for  $\text{C}_7\text{H}_4\text{NO}_5$   $[\text{M}-\text{H}]^-$ : 182.0089; found: 182.0090.

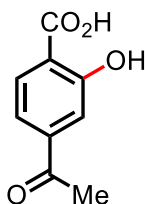

#### 4-acetyl-2-hydroxybenzoic acid (4r)

Substrate **3r** was hydroxylated following general procedure conditions **B**, the hydroxylated product **4r** was obtained as an ivory solid (125 mg, 69%),  $^1\text{H}$  NMR (600 MHz, Methanol- $d_4$ )  $\delta$  7.97 (d,  $J = 8.1$  Hz, 1H), 7.48 – 7.44 (m, 2H), 2.60 (s, 3H).  $^{13}\text{C}$  NMR (151 MHz, Methanol- $d_4$ )  $\delta$  199.90, 163.00, 143.18, 132.16, 120.12, 119.04, 117.68, 26.95. (One peak corresponds –COOH was not detected) HRMS (ESI-TOF) Calcd for  $\text{C}_9\text{H}_7\text{O}_4$   $[\text{M}-\text{H}]^-$ : 179.0344; found: 179.0344.

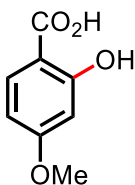

#### 2-hydroxy-4-methoxybenzoic acid (4s)

Substrate **3s** was hydroxylated following general procedure conditions **B**, the hydroxylated product **4s** was obtained as an ivory solid (102 mg, 61%),  $^1\text{H}$  NMR (600 MHz, Methanol- $d_4$ )  $\delta$  7.76 (d,  $J = 8.7$  Hz, 1H), 6.49 – 6.40 (m, 2H), 3.82 (s, 3H).  $^{13}\text{C}$  NMR (151 MHz, Methanol- $d_4$ )  $\delta$  173.38, 167.14, 165.37, 132.89, 107.93, 106.78, 101.58, 55.97. HRMS (ESI-TOF) Calcd for  $\text{C}_8\text{H}_7\text{O}_4$   $[\text{M}-\text{H}]^-$ : 167.0344; found: 167.0346.

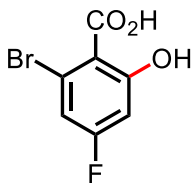

### 2-bromo-4-fluoro-6-hydroxybenzoic acid (**4t**)

Substrate **3t** was hydroxylated following general procedure conditions **B** but  $\text{K}_2\text{HPO}_4 \cdot 3\text{H}_2\text{O}$  was used instead of CsOAc and the reaction was run for 48 h, the hydroxylated product **4t** was obtained as an ivory solid (157 mg, 67%),  $^1\text{H}$  NMR (600 MHz, Methanol- $d_4$ )  $\delta$  6.85 (dd,  $J = 8.6, 2.6$  Hz, 1H), 6.55 (dd,  $J = 10.2, 2.6$  Hz, 1H).  $^{13}\text{C}$  NMR (151 MHz, Methanol- $d_4$ )  $\delta$  173.96, 164.91 (d,  $J = 249.8$  Hz), 164.81 (d,  $J = 14.0$  Hz), 124.95 (d,  $J = 12.9$  Hz), 118.13, 113.10 (d,  $J = 25.3$  Hz), 103.64 (d,  $J = 23.2$  Hz).  $^{19}\text{F}$  NMR (376 MHz, Methanol- $d_4$ )  $\delta$  -111.12. HRMS (ESI-TOF) Calcd for  $\text{C}_7\text{H}_3\text{BrFO}_3$   $[\text{M}-\text{H}]^-$ : 232.9250; found: 232.9251.

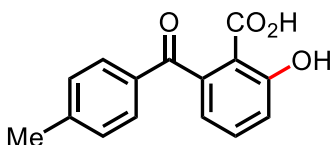

### 2-hydroxy-6-(4-methylbenzoyl)benzoic acid (**4u**)

Substrate **3u** was hydroxylated following general procedure conditions **B** to afford the hydroxylated product **4u** (244 mg, 95%),  $^1\text{H}$  NMR (600 MHz, Methanol- $d_4$ )  $\delta$  7.60 (d,  $J = 8.0$  Hz, 2H), 7.53 (dd,  $J = 8.4, 7.4$  Hz, 1H), 7.26 (d,  $J = 8.0$  Hz, 2H), 7.08 (dd,  $J = 8.4, 1.1$  Hz, 1H), 6.76 (dd,  $J = 7.4, 1.1$  Hz, 1H), 2.39 (s, 3H).  $^{13}\text{C}$  NMR (151 MHz, Methanol- $d_4$ )  $\delta$  200.93, 162.72, 144.93, 144.57, 136.90, 133.57, 130.38, 130.06, 129.85, 118.45, 117.84, 21.57. (One peak corresponds  $-\text{COOH}$  was not detected) HRMS (ESI-TOF) Calcd for  $\text{C}_{15}\text{H}_{11}\text{O}_4$   $[\text{M}-\text{H}]^-$ : 255.0657; found: 255.0657.

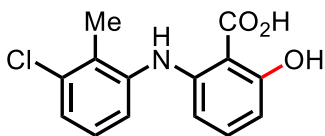

### 2-((3-chloro-2-methylphenyl)amino)-6-hydroxybenzoic acid (**4v**)

Substrate **3v** was hydroxylated following general procedure conditions **B**, the hydroxylated product **4v** was obtained as a brown solid (255 mg, 92%), <sup>1</sup>H NMR (400 MHz, Methanol-*d*<sub>4</sub>) δ 7.26 – 7.19 (m, 1H), 7.11 – 7.03 (m, 2H), 6.97 (t, *J* = 8.2 Hz, 1H), 6.26 – 6.04 (m, 2H), 2.28 (s, 3H). <sup>13</sup>C NMR (100 MHz, Methanol-*d*<sub>4</sub>) δ 164.47, 150.04, 143.43, 136.18, 133.59, 131.48, 127.84, 125.18, 123.01, 106.38, 104.66, 104.18, 15.23. (One peak corresponds – COOH was not detected) HRMS (ESI-TOF) Calcd for C<sub>14</sub>H<sub>11</sub>ClNO<sub>3</sub> [M-H]<sup>-</sup>: 276.0427; found: 276.0427.

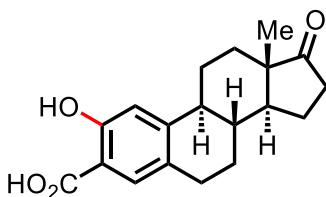

**(8*R*,9*S*,13*S*,14*S*)-2-hydroxy-13-methyl-17-oxo-7,8,9,11,12,13,14,15,16,17-decahydro-6*H*-cyclopenta[*a*]phenanthrene-3-carboxylic acid (**4w**)**

Substrate **3w** (0.5 mmol) was hydroxylated following general procedure conditions **B** but under room temperature, K<sub>2</sub>HPO<sub>4</sub>•3H<sub>2</sub>O was used instead of CsOAc. the hydroxylated product **4w** was obtained as an ivory solid (96.2 mg, 61%), <sup>1</sup>H NMR (600 MHz, Methanol-*d*<sub>4</sub>) δ 7.55 (s, 1H), 6.85 (s, 1H), 2.88 – 2.78 (m, 2H), 2.53 – 2.47 (m, 1H), 2.40 – 2.35 (m, 1H), 2.31 – 2.26 (m, 1H), 2.18 – 2.01 (m, 3H), 1.93 – 1.87 (m, 1H), 1.72 – 1.39 (m, 6H), 0.93 (s, 3H). <sup>13</sup>C NMR (151 MHz, Methanol-*d*<sub>4</sub>) δ 223.44, 173.40, 160.97, 149.76, 131.28, 128.61, 114.55, 111.70, 51.79, 49.17, 46.03, 39.11, 36.69, 32.71, 29.31, 27.61, 26.58, 22.51, 14.21. HRMS (ESI-TOF) Calcd for C<sub>19</sub>H<sub>21</sub>O<sub>4</sub> [M-H]<sup>-</sup>: 313.1440; found: 313.1439.



### 3. Synthetic Application

#### 3.1. Large Scale Reactions

**Attention: Peroxides are particularly dangerous when they are concentrated. Large scale reactions should be quenched and tested by the potassium iodide starch test paper.**

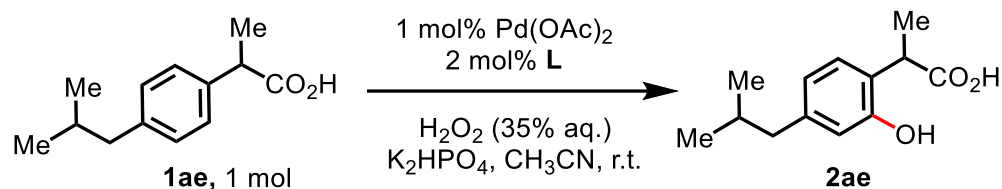

Pd(OAc)<sub>2</sub> (2.24 g, 0.01 mol, 1 mol%), **L4** (3.62 g, 0.02 mol, 2 mol%), carboxylic acid **1ae** (206 g, 1.0 mol), and K<sub>2</sub>HPO<sub>4</sub> (260 g, 1.5 mol, 1.5 equiv.) were weighed and placed in a 3 L round bottom glass flask. Then, CH<sub>3</sub>CN (2.0 L) was added and stirred vigorously for 30 min and H<sub>2</sub>O<sub>2</sub> (35% aq., 300 mL, 3.5 equiv.) was carefully added in several portions. The mixture was stirred at ambient temperature for 24 h. After that, the reaction was monitored by LCMS and H<sub>2</sub>O<sub>2</sub> (35% aq., 100 mL, 1.1 equiv.) was added and stirred vigorously for an additional 24 h. Upon completion, the reaction was carefully quenched with Na<sub>2</sub>S<sub>2</sub>O<sub>3</sub> aqueous solution until H<sub>2</sub>O<sub>2</sub> was completely decomposed. The mixture was acidified with 1 M aqueous HCl and filtered through Celite then washed with EtOAc. The aqueous layer was extracted with ethyl acetate three times. The combined organic layers were washed with brine then dried over anhydrous Na<sub>2</sub>SO<sub>4</sub> and concentrated under vacuum. The crude mixture was purified by multiple recrystallizations with Hexane/DCM. The mother liquor was further purified by flash chromatography (Hexane/EtOAc with 1% AcOH, v/v). The total hydroxylated product **2ae** was obtained as a white solid (179.2 g, 81%).

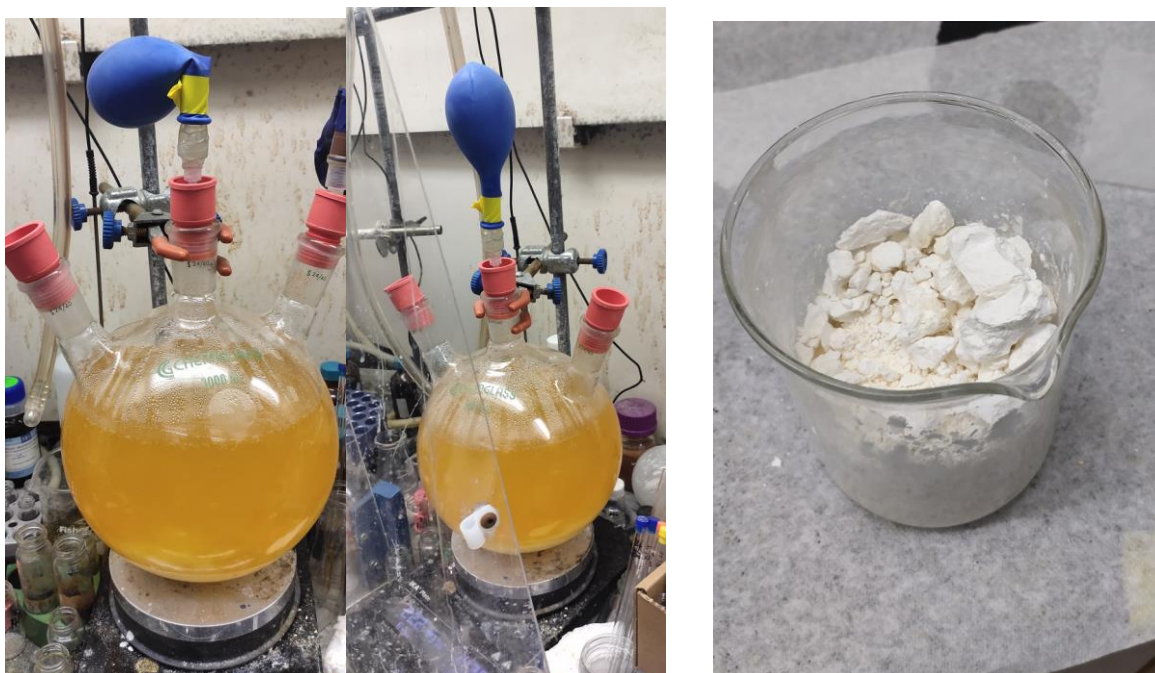

Reaction equipment

Hydroxylated product **2ae**

**Fig. S1. C(sp<sup>2</sup>)-H hydroxylation of Ibuprofen**

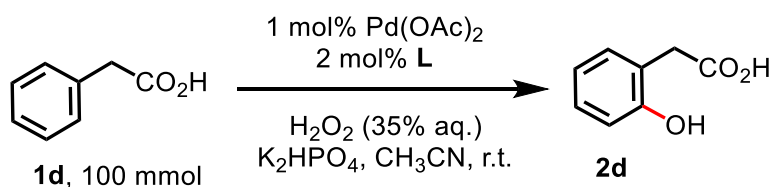

Pd(OAc)<sub>2</sub> (224 mg, 1 mmol, 1 mol%), **L4** (362 mg, 2 mmol, 2 mol%), carboxylic acid **1d** (13.6 g, 100 mmol), and K<sub>2</sub>HPO<sub>4</sub> (26.0 g, 150 mmol, 1.5 equiv.) were weighed and placed in a 500 mL round bottom glass flask. Then, CH<sub>3</sub>CN (250 mL) was added and stirred vigorously for 30 min and H<sub>2</sub>O<sub>2</sub> (35% aq., 30 mL, 3.5 equiv.) was carefully added in several portions. The mixture was stirred at ambient temperature for 48 h. Upon completion, the reaction was carefully quenched with Na<sub>2</sub>S<sub>2</sub>O<sub>3</sub> aqueous solution until H<sub>2</sub>O<sub>2</sub> was completely decomposed. The mixture was acidified with 1 M aqueous HCl and filtered through Celite then washed with EtOAc. The aqueous layer was extracted with ethyl acetate three times. The combined organic layers were dried over anhydrous Na<sub>2</sub>SO<sub>4</sub> and concentrated under vacuum. The crude mixture was purified by multiple recrystallizations with Hexane/ EtOAc.

The mother liquor was further purified by flash chromatography (Hexane/EtOAc with 1% AcOH, v/v). The hydroxylated product **2d** was obtained as a white solid (12.4 g, 82%).

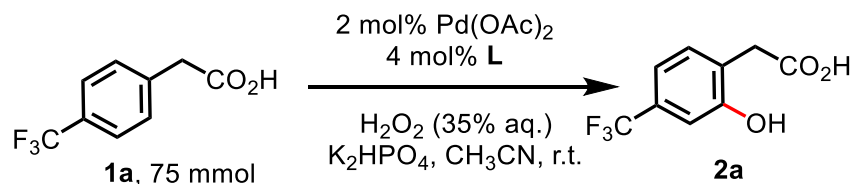

Pd(OAc)<sub>2</sub> (336 mg, 1.5 mmol, 2 mol%), **L4** (543 mg, 3 mmol, 2 mol%), carboxylic acid **1d** (15.3 g, 75 mmol), and K<sub>2</sub>HPO<sub>4</sub> (19.7 g, 113 mmol, 1.5 equiv.) were weighed and placed in a 500 mL round bottom glass flask. Then, CH<sub>3</sub>CN (200 mL) was added and stirred vigorously for 30 min and H<sub>2</sub>O<sub>2</sub> (35% aq., 22.5 mL, 3.5 equiv.) was carefully added in several portions. The mixture was stirred at ambient temperature for 48 h. Upon completion, the reaction was carefully quenched with Na<sub>2</sub>S<sub>2</sub>O<sub>3</sub> aqueous solution until H<sub>2</sub>O<sub>2</sub> was completely decomposed. The mixture was acidified with 1 M aqueous HCl and filtered through Celite then washed with EtOAc. The aqueous layer was extracted with ethyl acetate three times. The combined organic layers were dried over anhydrous Na<sub>2</sub>SO<sub>4</sub> and concentrated under vacuum. The crude mixture was purified by flash chromatography (Hexane/EtOAc with 1% AcOH, v/v). The hydroxylated product **2d** was obtained as a yellow solid (12.6 g, 76%).

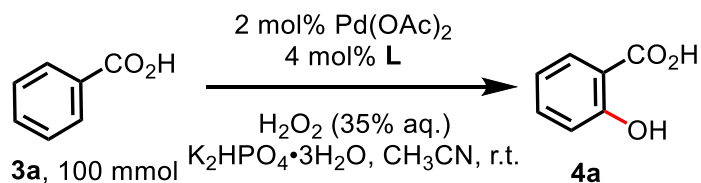

Pd(OAc)<sub>2</sub> (448 mg, 2 mmol, 2 mol%), **L4** (724 mg, 4 mmol, 4 mol%), carboxylic acid **1d** (12.2 g, 100 mmol), and K<sub>2</sub>HPO<sub>4</sub> (26.0 g, 150 mmol, 1.5 equiv.) were weighed and placed in a 500 mL round bottom glass flask. Then, CH<sub>3</sub>CN (250 mL) was added and stirred vigorously for 30 min and H<sub>2</sub>O<sub>2</sub> (35% aq., 30 mL, 3.5 equiv.) was carefully added in several portions. The mixture was stirred at ambient temperature for 48 h. Upon completion, the reaction was carefully quenched with Na<sub>2</sub>S<sub>2</sub>O<sub>3</sub> aqueous solution until H<sub>2</sub>O<sub>2</sub> was completely decomposed. The mixture was acidified with 1 M aqueous HCl and filtered through Celite then washed with EtOAc. The aqueous layer was extracted with ethyl acetate three times.

The combined organic layers were dried over anhydrous Na<sub>2</sub>SO<sub>4</sub> and concentrated under vacuum. The crude mixture was purified by multiple recrystallizations. The hydroxylated product **2d** was obtained as a white solid (10.6 g, 77%).

### 3.2. Further Derivatizations of Phenolic Products

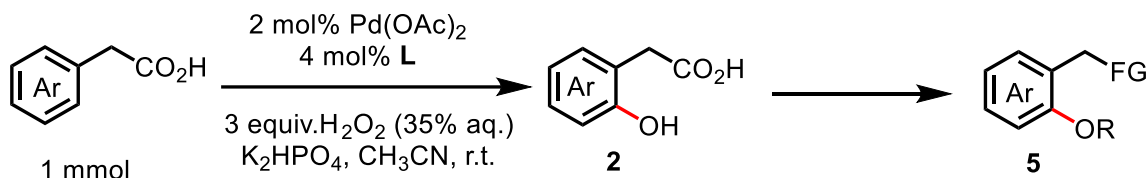

Pd(OAc)<sub>2</sub> (4.5 mg, 0.02 mmol, 2 mol%), **L4** (7.3 mg, 0.04 mmol, 4 mol%), carboxylic acid **1d** or **1a** (1.0 mmol), and K<sub>2</sub>HPO<sub>4</sub> (260.0 mg, 1.5 mmol, 1.5 equiv.) were weighed and placed in an 8 mL vial. Then, CH<sub>3</sub>CN (3.0 mL) was added and stirred for 5 min, followed by the addition of H<sub>2</sub>O<sub>2</sub> (35% aq., 300 uL, 3.5 equiv.). The vial was sealed with a screw cap and stirred at ambient temperature for 24 h. Upon completion, the reaction was quenched with aqueous Na<sub>2</sub>SO<sub>3</sub> solution and acidified with 1 M aqueous HCl. The solution was filtered through a pad of Celite then washed with ethyl acetate. The aqueous layer was extracted with ethyl acetate three times and the combined organic layers were dried over anhydrous Na<sub>2</sub>SO<sub>4</sub> and concentrated under vacuum. The crude mixture **2d** or **2a** was used in the next step without further purification.

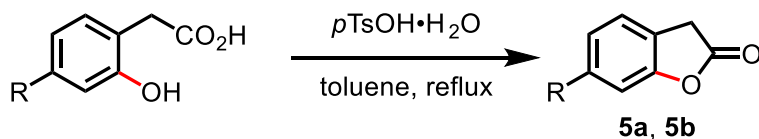

To a 25 mL flask provided with Dean-Stark trap and magnetic stirrer was added crude **2d** or **2a** in 15 mL of toluene and catalytic amounts of *p*-TsOH (0.1 mmol). The mixture was refluxed for overnight with removal of water and then the residual solvent was removed at reduced pressure. The crude mixture was purified by flash column chromatography (Hexane/EtOAc) to give the corresponding lactone products.

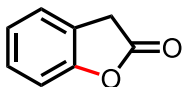

**benzofuran-2(3H)-one (5a)**

[CAS: 553-86-6] Yellow oil, 91.1 mg, 68%,  $^1\text{H}$  NMR (400 MHz, Chloroform-*d*)  $\delta$  7.34 – 7.27 (m, 2H), 7.17 – 7.09 (m, 2H), 3.74 (s, 2H).  $^{13}\text{C}$  NMR (100 MHz, Chloroform-*d*)  $\delta$  174.29, 154.87, 129.07, 124.81, 124.27, 123.21, 110.97, 33.17. The NMR data matches the reported data<sup>5</sup>.

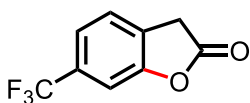

**6-(trifluoromethyl)benzofuran-2(3H)-one (5b)**

Yellow solid, 123.2 mg, 61%,  $^1\text{H}$  NMR (400 MHz, Chloroform-*d*)  $\delta$  7.46 – 7.39 (m, 2H), 7.38 – 7.34 (m, 1H), 3.81 (s, 2H).  $^{13}\text{C}$  NMR (151 MHz, Chloroform-*d*)  $\delta$  172.85, 154.84, 131.78 (q,  $J = 33.1$  Hz), 127.17, 123.60 (q,  $J = 272.4$  Hz), 125.23, 121.31 (q,  $J = 4.0$  Hz), 108.23 (q,  $J = 3.9$  Hz), 32.94.  $^{19}\text{F}$  NMR (376 MHz,  $\text{CDCl}_3$ )  $\delta$  -65.22. HRMS (ESI-TOF) Calcd for  $\text{C}_9\text{H}_4\text{F}_3\text{O}_2$   $[\text{M}-\text{H}]^-$ : 201.0169; found: 201.0168.

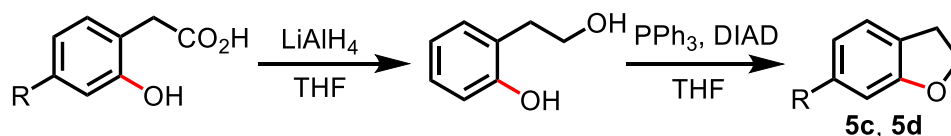

To a solution of crude **2d** or **2a** in THF (2.0 mL) was added lithium aluminum hydride solution (2.0 M in THF, 1.0 mL, 2 mmol) at 0 °C. The reaction mixture was warmed to ambient temperature and stirred for 6 h. Upon completion, the mixture was diluted with 10 mL  $\text{Et}_2\text{O}$  and carefully quenched with 1 M aqueous HCl at 0 °C until the solution becomes clear. The aqueous layer was extracted with EtOAc. The combined organic layers were washed with brine then dried and evaporated under reduced pressure. The crude product was used in the next step without further purification.

To a solution of the crude alcohol in THF (2.0 mL) was added  $\text{PPh}_3$  (314.4 mg, 1.2 mmol) and diisopropyl azodicarboxylate (303.3 mg, 1.5 mmol). The mixture was stirred at ambient

temperature until the diol was no longer apparent by TLC. Upon completion, the reaction was diluted with 20 mL diethyl ether and stirred for 30 min. The mixture was filtered through Celite and evaporated under reduced pressure. The crude product was purified by flash chromatography (Hexane/EtOAc = 10:1, v/v) to give the corresponding product.

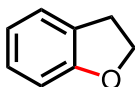

### 2,3-dihydrobenzofuran (5c)

[CAS: 496-16-2] Colourless liquid, 87.6 mg, 73%,  $^1\text{H}$  NMR (600 MHz, Chloroform-*d*)  $\delta$  7.20 (d,  $J = 7.2$  Hz, 1H), 7.11 (t,  $J = 7.7$  Hz, 1H), 6.84 (td,  $J = 7.4, 1.0$  Hz, 1H), 6.79 (d,  $J = 7.7$  Hz, 1H), 4.56 (t,  $J = 8.7$  Hz, 2H), 3.21 (t,  $J = 8.6$  Hz, 2H).  $^{13}\text{C}$  NMR (151 MHz, Chloroform-*d*)  $\delta$  160.14, 128.06, 127.00, 125.04, 120.46, 109.49, 71.14, 29.88. The NMR data matches the reported data<sup>6</sup>.

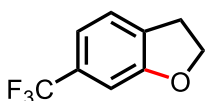

### 6-(trifluoromethyl)-2,3-dihydrobenzofuran (5d)

[CAS: 1391072-82-4] yellow liquid, 120.8 mg, 64%,  $^1\text{H}$  NMR (600 MHz, Chloroform-*d*)  $\delta$  7.26 (d,  $J = 8.1$  Hz, 1H), 7.11 (d,  $J = 7.7$  Hz, 1H), 7.00 (s, 1H), 4.63 (t,  $J = 8.8$  Hz, 2H), 3.25 (tt,  $J = 8.7, 1.3$  Hz, 2H).  $^{13}\text{C}$  NMR (151 MHz, Chloroform-*d*)  $\delta$  160.47, 131.33, 131.71 (q,  $J = 32.2$  Hz), 125.16, 124.28 (q,  $J = 272.1$  Hz), 117.65 (q,  $J = 4.2$  Hz), 106.47 (q,  $J = 3.8$  Hz), 71.80, 29.65.  $^{19}\text{F}$  NMR (376 MHz, Chloroform-*d*)  $\delta$  -64.91. The NMR data matches the reported data<sup>7</sup>.

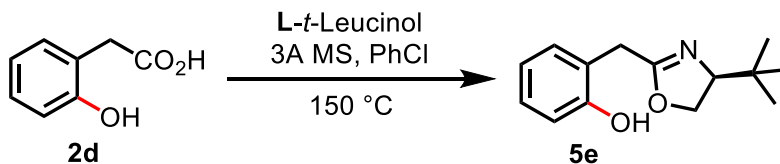

To a solution of crude **2d** in PhCl (4.0 mL) was added *L-tert*-Leucinol (156  $\mu\text{L}$ , 1.2 mmol) and activated 3A molecule sieve (200 mg). The reaction mixture was heated to 150  $^\circ\text{C}$  and

stirred for 24 h. After cooling down to room temperature, the reaction mixture was diluted with EtOAc, filtered, and evaporated under reduced pressure. The crude product was purified by flash chromatography (hexane/EtOAc = 4:1, v/v) to give product **5e** as a white solid (177.1 mg, 76%).

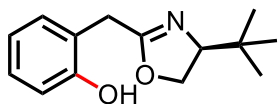

**(S)-2-((4-(tert-butyl)-4,5-dihydrooxazol-2-yl)methyl)phenol (5e)**

[CAS: 1816267-52-3]  $^1\text{H}$  NMR (600 MHz, Chloroform-*d*)  $\delta$  10.60 (br s, 1H), 7.19 (td,  $J = 7.7, 1.7$  Hz, 1H), 7.05 (dd,  $J = 7.7, 1.7$  Hz, 1H), 6.98 (dd,  $J = 8.1, 1.4$  Hz, 1H), 6.83 (td,  $J = 7.4, 1.3$  Hz, 1H), 4.25 (dd,  $J = 10.2, 8.8$  Hz, 1H), 4.13 (t,  $J = 8.4$  Hz, 1H), 3.89 (dd,  $J = 10.1, 8.0$  Hz, 1H), 3.69–3.57 (m, 2H), 0.87 (s, 9H).  $^{13}\text{C}$  NMR (151 MHz, Chloroform-*d*)  $\delta$  168.94, 156.60, 130.64, 129.16, 122.11, 120.25, 119.07, 74.93, 69.73, 33.65, 31.69, 25.72. The NMR data matches the reported data<sup>8</sup>.

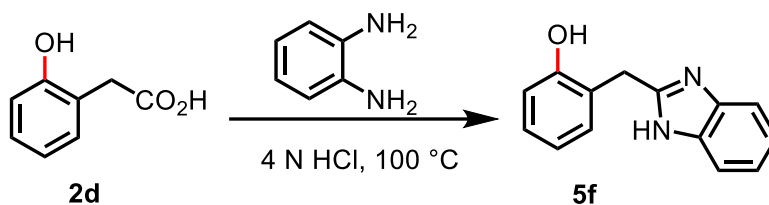

To a solution of crude **2d** in 4M aqueous HCl (2.0 mL) was added *o*-Phenylenediamine (129 mg, 1.2 mmol). The reaction mixture was heated to 100 °C and stirred for 24 h. After cooling down to room temperature, a saturated aqueous NaHCO<sub>3</sub> solution (20 mL) was added and extracted with EtOAc three times. The combined organic layers were washed with brine then dried and evaporated under reduced pressure. The crude product was purified by flash chromatography (DCM-MeOH 20:1, v/v) to give product **5f** as a white solid (105.3 mg, 47%).

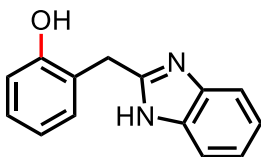

### 2-((1H-benzo[d]imidazol-2-yl)methyl)phenol (5f)

[CAS: 3416-07-7]  $^1\text{H}$  NMR (600 MHz, Methanol- $d_4$ )  $\delta$  7.50 – 7.44 (m, 2H), 7.18 – 7.13 (m, 2H), 7.12 – 7.05 (m, 2H), 6.83 (dd,  $J = 8.0, 1.2$  Hz, 1H), 6.77 (td,  $J = 7.5, 1.2$  Hz, 1H), 4.20 (s, 2H).  $^{13}\text{C}$  NMR (151 MHz, Methanol- $d_4$ )  $\delta$  155.13, 154.26, 138.15, 129.97, 127.95, 123.21, 121.71, 119.36, 114.82, 114.00, 29.40. The NMR data matches the reported data<sup>9</sup>.

### 3.3. Synthesis of Coumestan and Ptercarpene Derivatives

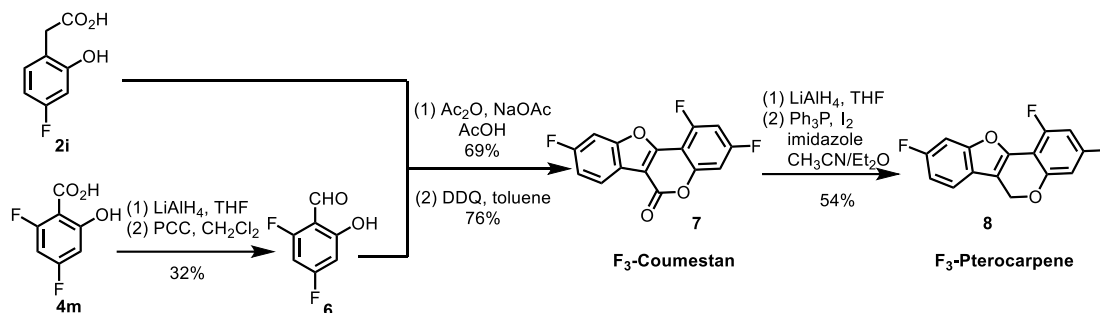

#### Synthesis of compound 6

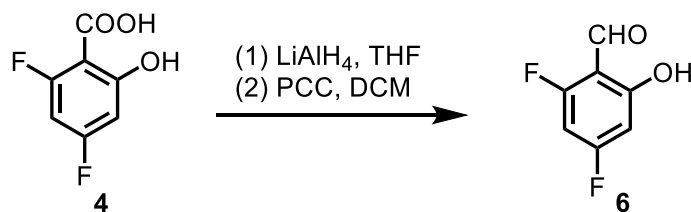

To a solution of **4** (1.044 g, 6 mmol) in THF (10.0 mL) was added lithium aluminum hydride solution (2.0 M in THF, 4.5 mL, 9 mmol) at 0 °C. The reaction mixture was heated to 50 °C and stirred for 6 h. After cooling down to room temperature, the mixture was diluted with 20 mL of Et<sub>2</sub>O and carefully quenched with 1 M aqueous HCl at 0 °C until the solution becomes clear. The aqueous layer was extracted with Et<sub>2</sub>O. The combined organic layers were washed with brine then dried and evaporated under reduced pressure. The crude product was used in the next step without further purification.



To a solution of crude alcohol in DCM (20 mL) was added Pyridinium chlorochromate (1.293 mg, 6 mmol, 1.0 equiv.) and Celite (1 g). The mixture was stirred at room temperature for 2 h. Upon completion, the mixture was filtered and directly purified by flash chromatography (Hexane/EtOAc = 10:1 as eluent) to give compound **6** as a colorless oil (This compound is extremely volatile).

### Synthesis of compound **7**

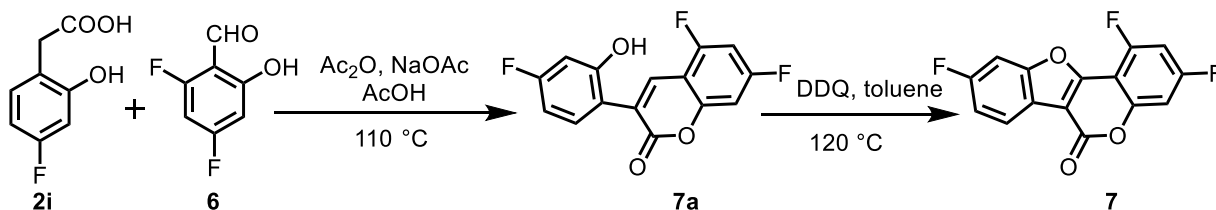

To a solution of **2i** (170 mg, 1 mmol) and **6** (190 mg, 1.2 mmol) in AcOH (4.0 mL) was added NaOAc (410 mg, 5 mmol) and Ac<sub>2</sub>O (227  $\mu$ L, 2.4 mmol). The reaction mixture was heated to 110 °C and stirred for 20 h. After cooling down to room temperature, a saturated aqueous NaHCO<sub>3</sub> solution (20 mL) was added and extracted with EtOAc three times. The combined organic layers were washed with brine then dried and evaporated under reduced pressure. The crude product was purified by flash chromatography (Hexane/EtOAc = 5:1, v/v) to give product **7a** as a white solid (201.5 mg, 69%).

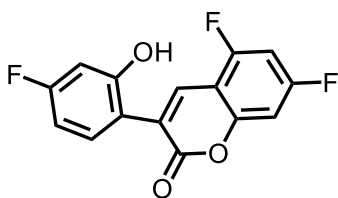

### 5,7-difluoro-3-(4-fluoro-2-hydroxyphenyl)-2H-chromen-2-one (**7a**)

<sup>1</sup>H NMR (600 MHz, Acetone-*d*<sub>6</sub>)  $\delta$  9.15 (s, 1H), 8.05 (s, 1H), 7.44 (dd, *J* = 8.5, 6.7 Hz, 1H), 7.15 – 7.06 (m, 2H), 6.78 – 6.68 (m, 2H). <sup>13</sup>C NMR (151 MHz, Acetone-*d*<sub>6</sub>)  $\delta$  164.85 (dd, *J* = 251.6, 14.8 Hz), 164.52 (d, *J* = 245.7 Hz), 159.90 (dd, *J* = 254.9, 15.4 Hz), 159.54, 157.54 (d, *J* = 11.6 Hz), 155.98 (dd, *J* = 15.6, 7.6 Hz), 134.76, 133.34 (d, *J* = 15.1 Hz), 125.49, 119.36 (d, *J* = 3.8 Hz), 107.39 (dd, *J* = 19.3, 3.3 Hz), 107.06 (d, *J* = 21.7 Hz), 104.01 (d, *J* =

24.3 Hz), 101.06 (dd,  $J = 26.0, 4.4$  Hz), 100.72 (dd,  $J = 27.3, 24.3$  Hz).  $^{19}\text{F}$  NMR (376 MHz, Acetone- $d_6$ )  $\delta$  -105.29 (d,  $J = 7.8$  Hz), -112.73, -117.22 (d,  $J = 7.8$  Hz). HRMS (ESI-TOF) Calcd for  $\text{C}_{15}\text{H}_8\text{F}_3\text{O}_3$   $[\text{M}+\text{H}]^+$ : 293.0426; found: 293.0429.

To a solution of **7a** (0.69 mmol) in toluene (8.0 mL) was added DDQ (317.8 mg, 1.4 mmol). The reaction mixture was heated to 120 °C and stirred for 12 h. After cooling down to room temperature, the mixture was filtered through Celite and evaporated under reduced pressure. The crude product was purified by flash chromatography (Hexane/EtOAc = 10:1, v/v) to give product **7** as a white solid (152.1 mg, 76%).

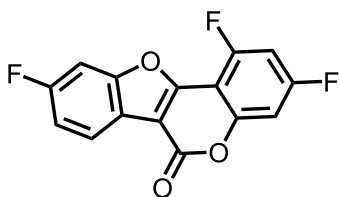

### 1,3,9-trifluoro-6H-benzofuro[3,2-c]chromen-6-one (**7**)

$^1\text{H}$  NMR (600 MHz, Chloroform- $d$ )  $\delta$  8.06 (dd,  $J = 8.6, 5.3$  Hz, 1H), 7.44 (dd,  $J = 8.3, 2.2$  Hz, 1H), 7.28 – 7.22 (m, 1H), 7.08 (dt,  $J = 8.9, 2.0$  Hz, 1H), 6.94 (ddd,  $J = 9.9, 8.8, 2.3$  Hz, 1H).  $^{13}\text{C}$  NMR (151 MHz, Chloroform- $d$ )  $\delta$  164.25 (dd,  $J = 255.3, 13.7$  Hz), 162.23 (d,  $J = 247.8$  Hz), 157.88 (dd,  $J = 260.0, 15.0$  Hz), 157.60, 156.85, 155.93 (d,  $J = 14.0$  Hz), 154.77 (dd,  $J = 15.1, 7.7$  Hz), 122.45 (d,  $J = 10.1$  Hz), 118.91, 114.13 (d,  $J = 23.9$  Hz), 105.39, 101.75 (dd,  $J = 26.1, 4.5$  Hz), 101.42 (dd,  $J = 26.9, 23.0$  Hz), 100.56 (d,  $J = 21.3$  Hz) 100.42 (d,  $J = 27.6$  Hz).  $^{19}\text{F}$  NMR (376 MHz, Chloroform- $d$ )  $\delta$  -104.46 (d,  $J = 8.5$  Hz), -112.27 (d,  $J = 8.4$  Hz), -114.33. HRMS (ESI-TOF) Calcd for  $\text{C}_{15}\text{H}_6\text{F}_3\text{O}_3$   $[\text{M}+\text{H}]^+$ : 291.0269; found: 291.0268.

### Synthesis of compound **8**

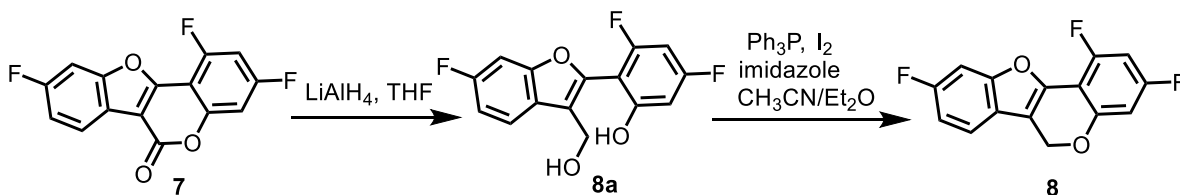

To a solution of **7** (0.2 mmol) in THF (1.0 mL) was added lithium aluminum hydride solution (2.0 M in THF, 0.2 mL, 0.4 mmol) at 0 °C. The reaction mixture was heated to 50 °C and stirred for 6 h. After cooling down to room temperature, the mixture was diluted with 10 mL THF and carefully quenched with 1 M aqueous HCl at 0 °C until the solution becomes clear. The aqueous layer was extracted with EtOAc. The combined organic layers were washed with brine then dried and evaporated under reduced pressure. The crude product was used in the next step without further purification.

To a solution of **8a**, imidazole (40.8 mg, 0.6 mmol) and PPh<sub>3</sub> (104.8 mg, 0.4 mmol) in CH<sub>3</sub>CN/Et<sub>2</sub>O (1.0/1.0 mL) was added I<sub>2</sub> (101.6 mg, 0.4 mmol) at 0 °C. The mixture was stirred at ambient temperature for 12 h. Upon completion, the reaction mixture was diluted with saturated aqueous NH<sub>4</sub>Cl solution and extracted with EtOAc three times. The combined organic layers were washed with brine then dried and evaporated under reduced pressure. The crude product was purified by flash chromatography (Hexane/EtOAc = 20:1, v/v) to give product **8** as a white solid (30.0 mg, 54% yield in two steps).

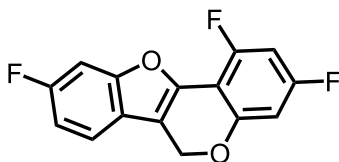

**1,3,9-trifluoro-6H-benzofuro[3,2-c]chromene (8)**

<sup>1</sup>H NMR (600 MHz, Chloroform-*d*) δ 7.33 – 7.27 (m, 2H), 7.04 (ddd, *J* = 9.4, 8.6, 2.3 Hz, 1H), 6.54 – 6.46 (m, 2H), 5.58 (s, 2H). <sup>13</sup>C NMR (151 MHz, Chloroform-*d*) δ 163.14 (dd, *J* = 249.3, 14.8 Hz), 161.10 (d, *J* = 243.9 Hz), 157.28 (dd, *J* = 253.2, 15.1 Hz), 155.86 (dd, *J* = 14.8, 6.6 Hz), 155.81 (dd, *J* = 15.4 Hz), 145.13, 121.12, 119.03 (d, *J* = 9.8 Hz), 111.98 (d, *J* = 24.2 Hz), 107.74, 102.44 (dd, *J* = 17.7, 3.9 Hz), 100.96 (dd, *J* = 25.8, 3.8 Hz), 100.08 (d, *J* = 27.0 Hz), 98.06 (dd, *J* = 26.4, 24.8 Hz), 65.70. <sup>19</sup>F NMR (376 MHz, Chloroform-*d*) δ -107.59 (d, *J* = 6.5 Hz), -114.64 (d, *J* = 6.4 Hz), -115.60. HRMS (ESI-TOF) Calcd for C<sub>15</sub>H<sub>8</sub>F<sub>3</sub>O<sub>2</sub> [M+H]<sup>+</sup>: 277.0476; found: 277.0472.

## 4. Mechanistic Studies

### 4.1. Deuterium-Labeling Experiments

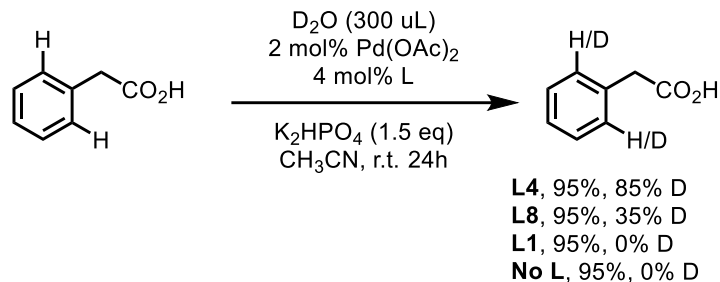

Pd(OAc)<sub>2</sub> (4.5 mg, 0.02 mmol, 2 mol%), **Ligand** (4 mol%), carboxylic acid **1d** (1.0 mmol), and K<sub>2</sub>HPO<sub>4</sub> (260.0 mg, 1.5 mmol, 1.5 equiv.) were weighed and placed in an 8 mL vial. Then, CH<sub>3</sub>CN (3.0 mL) was added and stirred for 5 min, followed by the addition of D<sub>2</sub>O (300 uL). The vial was sealed with a screw cap and stirred at ambient temperature for 24 h. Upon completion, the reaction mixture was diluted with EtOAc and acidified with formic acid. The mixture was filtered through Celite and evaporated under reduced pressure. The ratio of deuterium was analyzed by <sup>1</sup>H NMR with the corresponding pure compound.

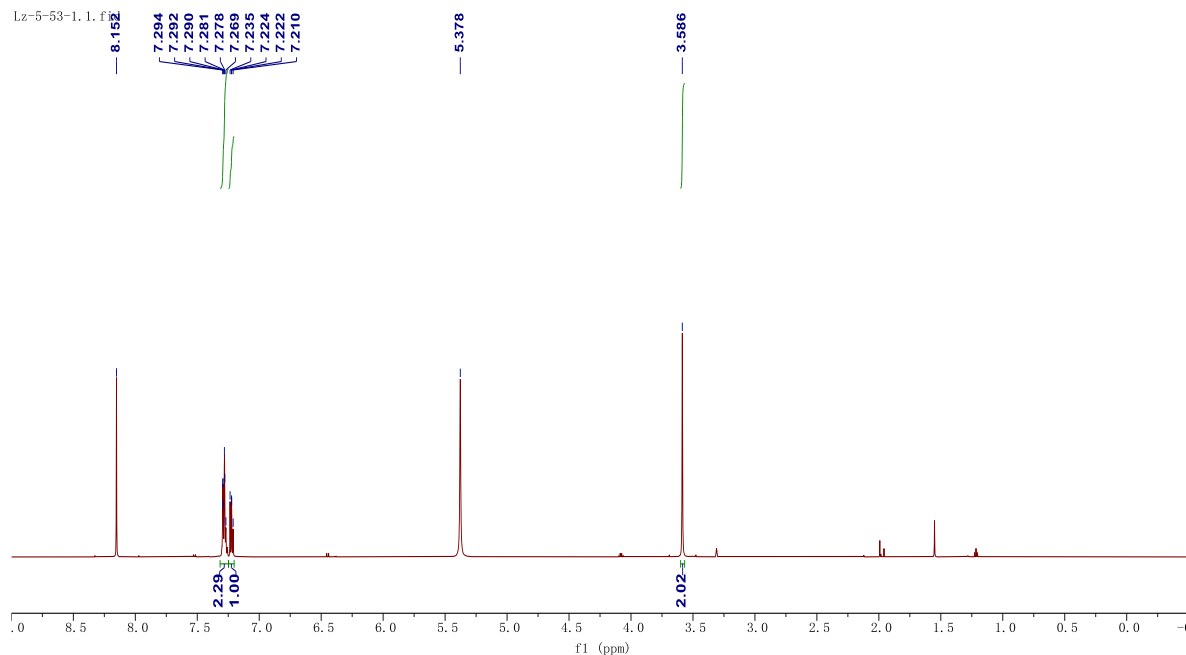

**Fig. S2.** <sup>1</sup>H NMR of H/D exchange experiment using L4

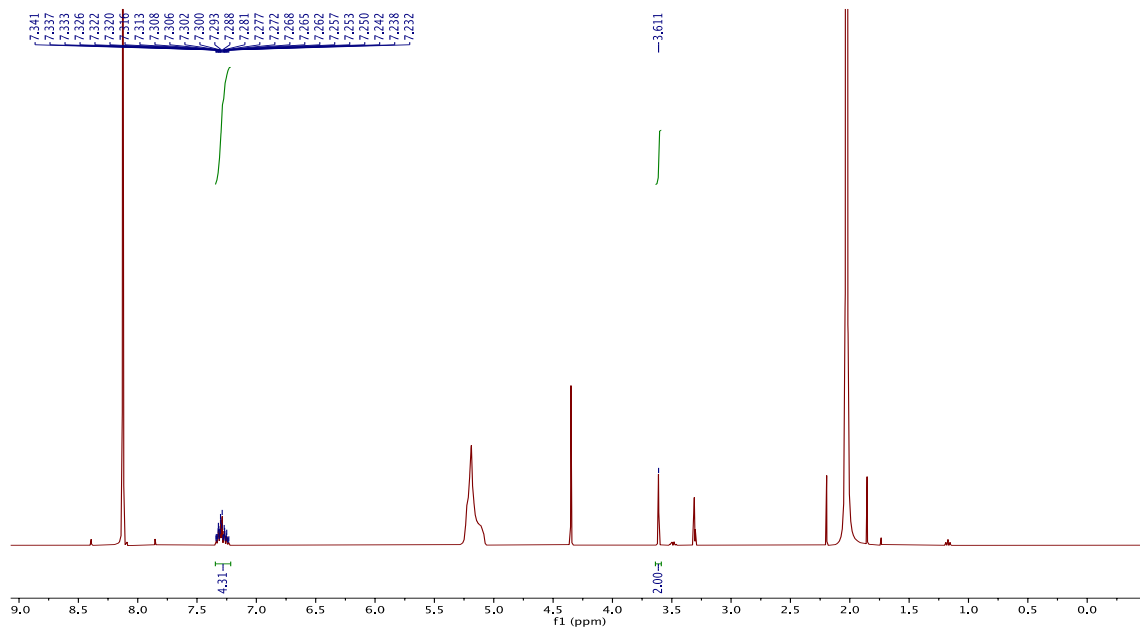

**Fig. S3. <sup>1</sup>H NMR of H/D exchange experiment using L8**

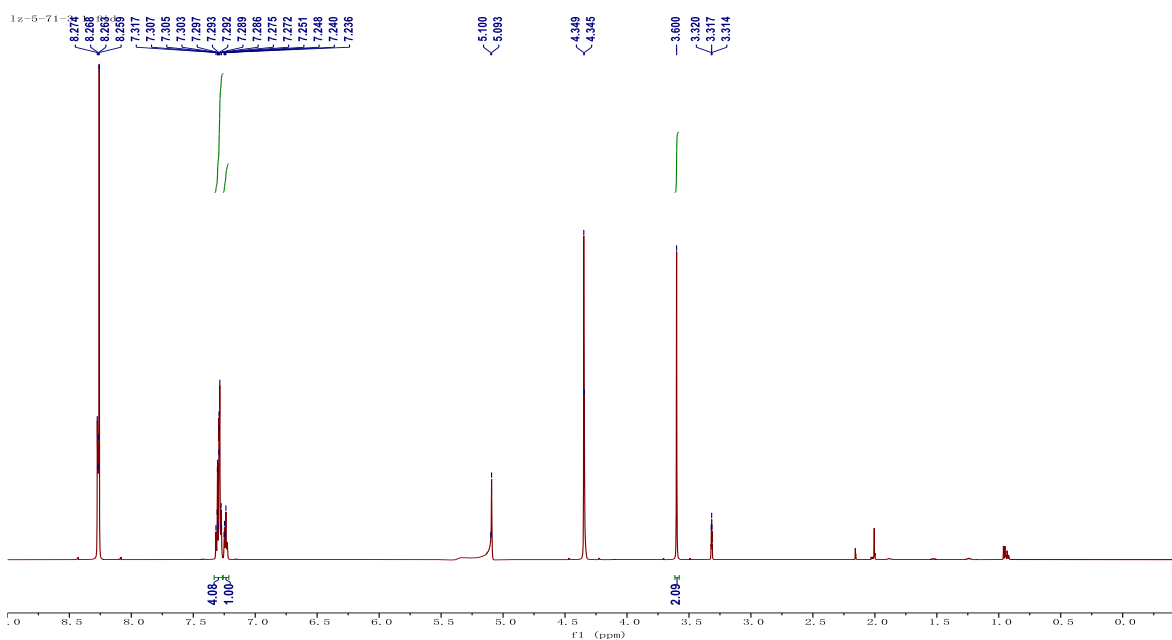

**Fig. S4. <sup>1</sup>H NMR of H/D exchange experiment using L1**

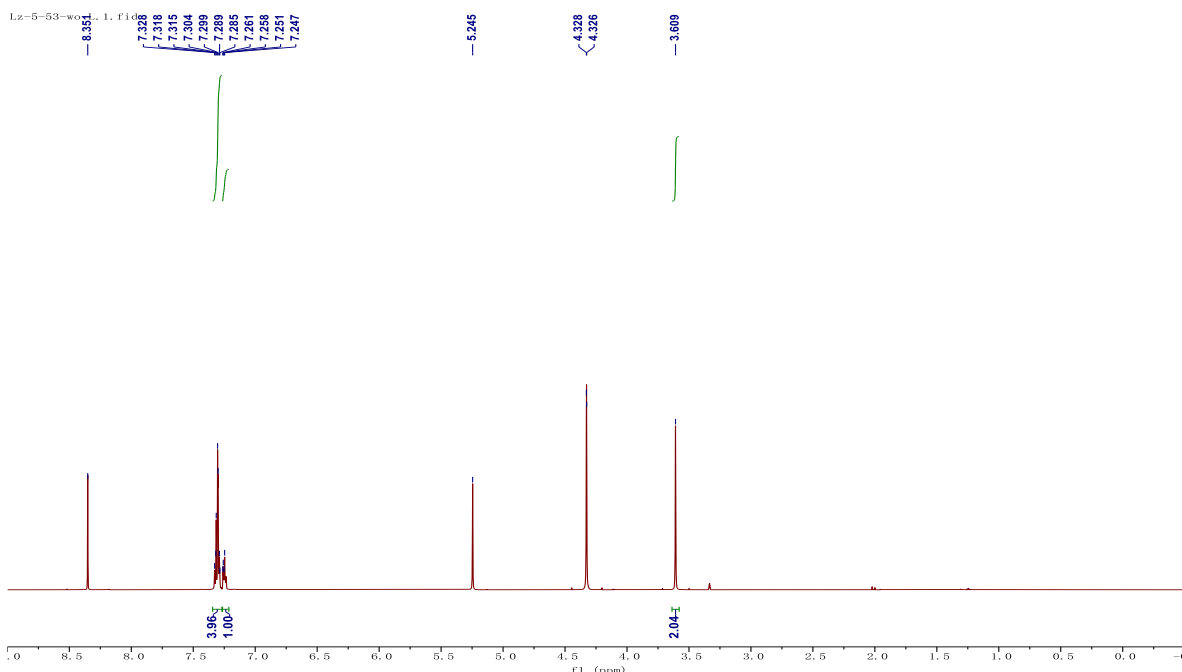

**Fig. S5.  $^1\text{H}$  NMR of H/D exchange experiment with no ligand**

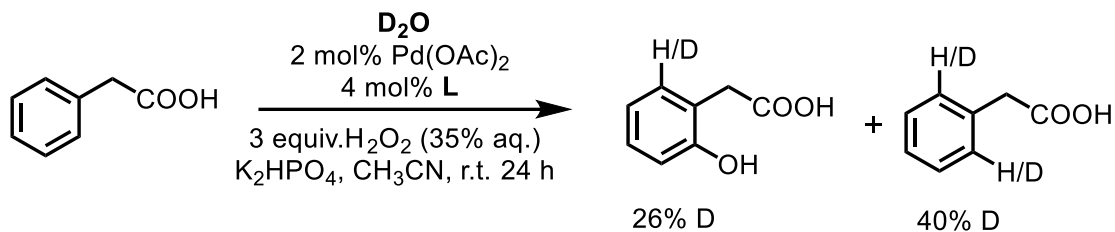

$\text{Pd}(\text{OAc})_2$  (4.5 mg, 0.02 mmol, 2 mol%), **L4** (7.3 mg, 0.04 mmol, 4 mol%), carboxylic acid **1d** (1.0 mmol), and  $\text{K}_2\text{HPO}_4$  (260.0 mg, 1.5 mmol, 1.5 equiv.) were weighed and placed in an 8 mL vial. Then,  $\text{CH}_3\text{CN}$  (3.0 mL) was added and stirred for 5 min, followed by the addition of  $\text{H}_2\text{O}_2$  (35% aq., 300  $\mu\text{L}$ , 3.0 equiv.) and  $\text{D}_2\text{O}$  (300  $\mu\text{L}$ ). The vial was sealed with a screw cap and stirred at ambient temperature for 24 h. Upon completion, the reaction was quenched with saturated  $\text{Na}_2\text{SO}_3$  solution. The mixture was diluted with  $\text{EtOAc}$  and acidified with formic acid. The solution was filtered through Celite, and the aqueous layer was extracted with ethyl acetate three times. The combined organic layers were dried over anhydrous  $\text{Na}_2\text{SO}_4$  and concentrated under vacuum. The ratios of deuterium were analyzed by  $^1\text{H}$  NMR with the corresponding pure compounds.

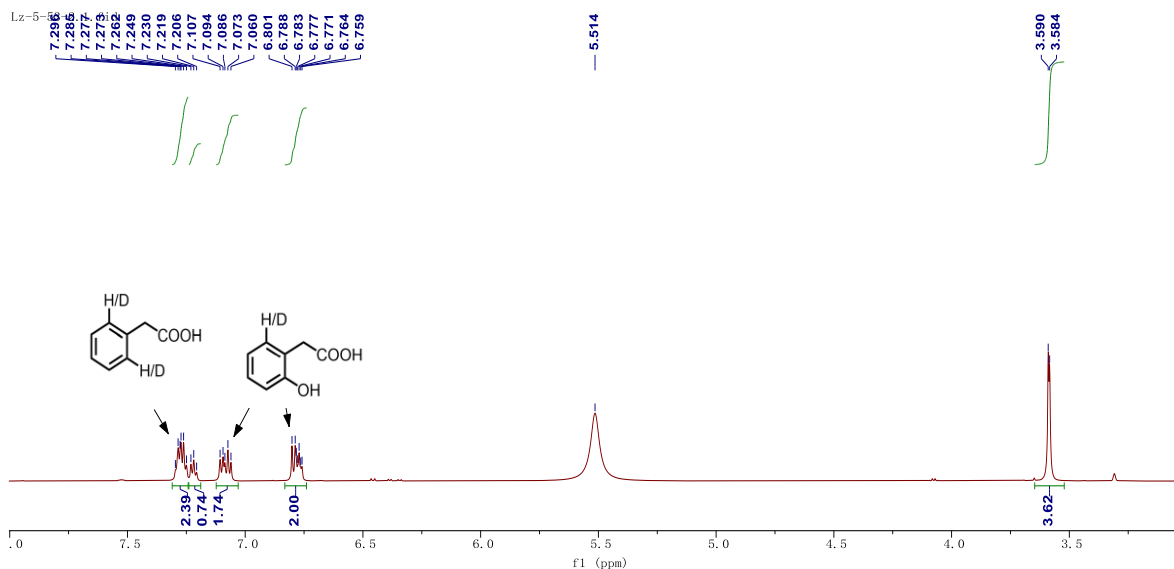

**Fig. S6.**  $^1\text{H}$  NMR of C–H hydroxylation in the presence of  $\text{D}_2\text{O}$

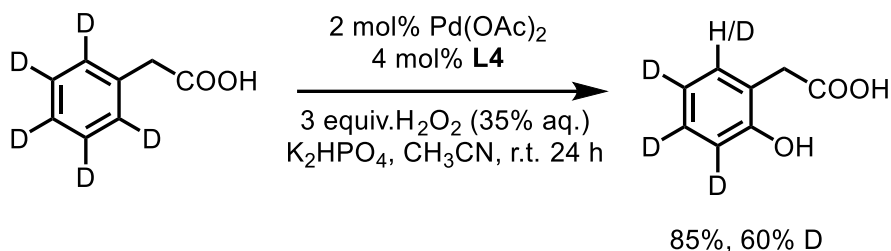

$\text{Pd}(\text{OAc})_2$  (4.5 mg, 0.02 mmol, 2 mol%), **L4** (7.3 mg, 0.04 mmol, 4 mol%), carboxylic acid **1d-d5** (1.0 mmol), and  $\text{K}_2\text{HPO}_4$  (260.0 mg, 1.5 mmol, 1.5 equiv.) were weighed and placed in an 8 mL vial. Then,  $\text{CH}_3\text{CN}$  (3.0 mL) was added and stirred for 5 min, followed by the addition of  $\text{H}_2\text{O}_2$  (35% aq., 300  $\mu\text{L}$ , 3.0 equiv.). The vial was sealed with a screw cap and stirred at ambient temperature for 24 h. Upon completion, the reaction was quenched with saturated  $\text{Na}_2\text{SO}_3$  solution. The reaction mixture was diluted with EtOAc and acidified with formic acid. The solution was filtered through Celite, and the aqueous layer was extracted with ethyl acetate three times. The combined organic layers were dried over anhydrous  $\text{Na}_2\text{SO}_4$  and concentrated under vacuum. The ratios of deuterium were analyzed by  $^1\text{H}$  NMR with the corresponding pure compounds.

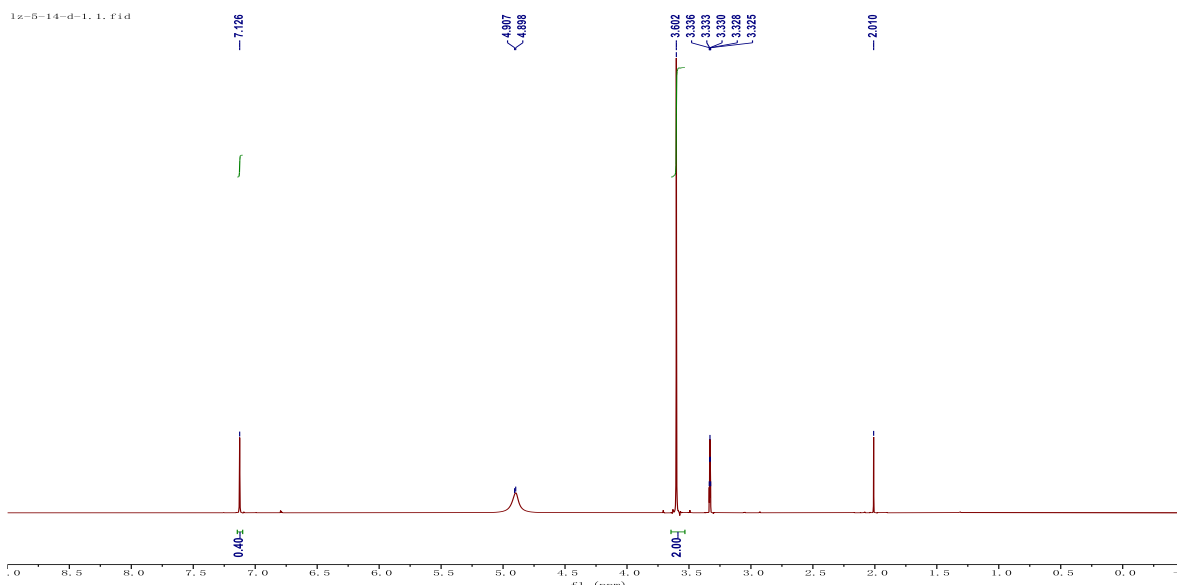

Fig. S7.  $^1\text{H}$  NMR of C–H hydroxylation of **1d-d<sub>5</sub>**

#### 4.2. KIE Experiments

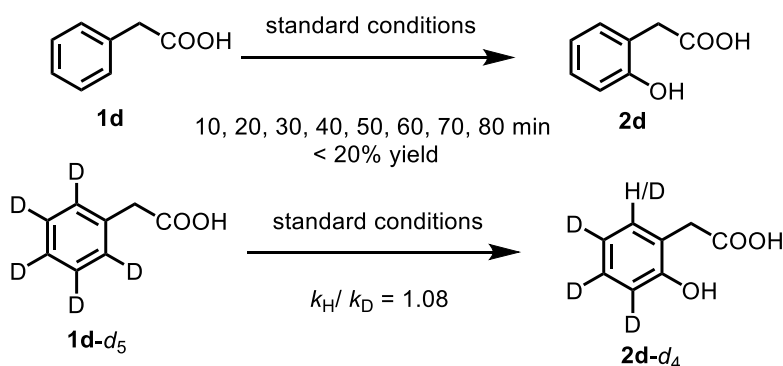

$\text{Pd}(\text{OAc})_2$  (4.5 mg, 0.02 mmol, 2 mol%), **L4** (7.3 mg, 0.04 mmol, 4 mol%), carboxylic acid **1d** (1.0 mmol) or **1d-d<sub>5</sub>** (1.0 mmol), and  $\text{K}_2\text{HPO}_4$  (260.0 mg, 1.5 mmol, 1.5 equiv.) were weighed and placed in an 8 mL vial. Then,  $\text{CH}_3\text{CN}$  (3.0 mL) was added and stirred for 5 min, followed by the addition of  $\text{H}_2\text{O}_2$  (35% aq., 300  $\mu\text{L}$ , 3.0 equiv.) and  $\text{CH}_3\text{NO}_2$  (54  $\mu\text{L}$ , 1 mmol). The reaction mixture was stirred at ambient temperature. A 40  $\mu\text{L}$  reaction mixture was taken at 10 min, 20 min, 30 min, 40 min, 50 min, 60 min, 70 min, 80 min and immediately diluted with formic acid (10  $\mu\text{L}$ ) in  $\text{Methanol-d}_4$  (500  $\mu\text{L}$ ). The obtained yields were plotted as concentration vs. time (Table **S8-9**) and the following initial rates were calculated.



| t (min)  | 2d (X10 <sup>-3</sup> mmol/mL) | 2d-d (X10 <sup>-3</sup> mmol/mL) |
|----------|--------------------------------|----------------------------------|
| 10       | 6.67                           | 5                                |
| 20       | 13.33                          | 13.33                            |
| 30       | 23.33                          | 23.33                            |
| 40       | 33.33                          | 31.67                            |
| 50       | 40                             | 38.33                            |
| 60       | 48.33                          | 43.33                            |
| 70       | 55                             | 55                               |
| 80       | 66.67                          | 60                               |
| <i>k</i> | 0.8453                         | 0.7857                           |

**Table S8. Reaction rate of hydroxylation of 2d**

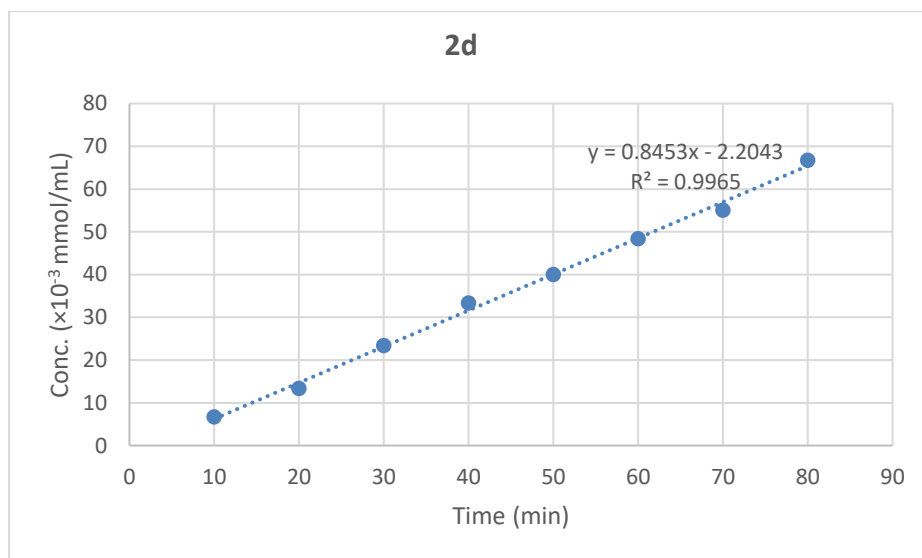

**Fig. S8. Reaction rate of hydroxylation of 2d**

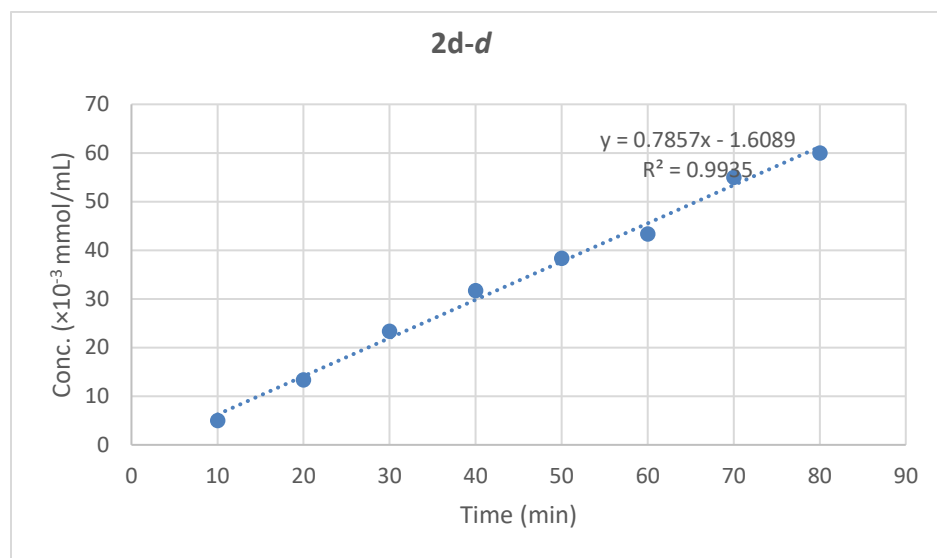

**Fig. S9. Reaction rate of hydroxylation of 2d-d<sub>4</sub>**

### 4.3. Stoichiometric Reaction

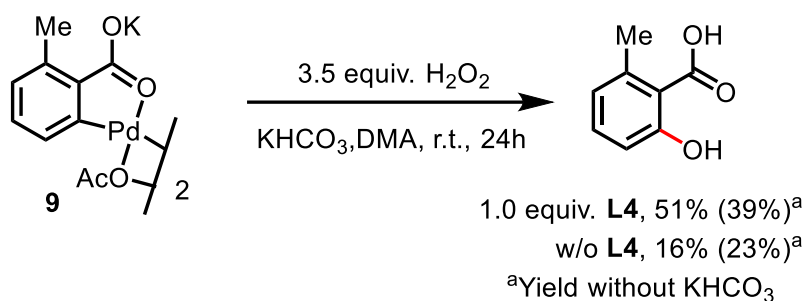

Complex **9**<sup>10</sup> (33.7 mg, 0.1 mmol, based on Pd), KHCO<sub>3</sub> (10 mg, 1.0 equiv) and **L4** (18.1 mg, 1.0 equiv) or without ligand were placed in an 8 mL vial. Then, DMA (0.5 mL) was added and stirred for 10 min, followed by the addition of H<sub>2</sub>O<sub>2</sub> (35% aq., 30  $\mu$ L, 3.5 equiv.). The reaction was stirred at ambient temperature. The aliquots were taken at 7 min, 14 min, 21 min, 60 min and quenched with formic acid. The progress was monitored by <sup>1</sup>H NMR. After 24 hr, the reaction was cooled down to 0 °C and quenched with formic acid (50  $\mu$ L) and diluted with EtOAc. The solution was filtered through a pad of Celite then concentrated under vacuum. The yield of hydroxylated product was analyzed by <sup>1</sup>H NMR (Figure **S10**).

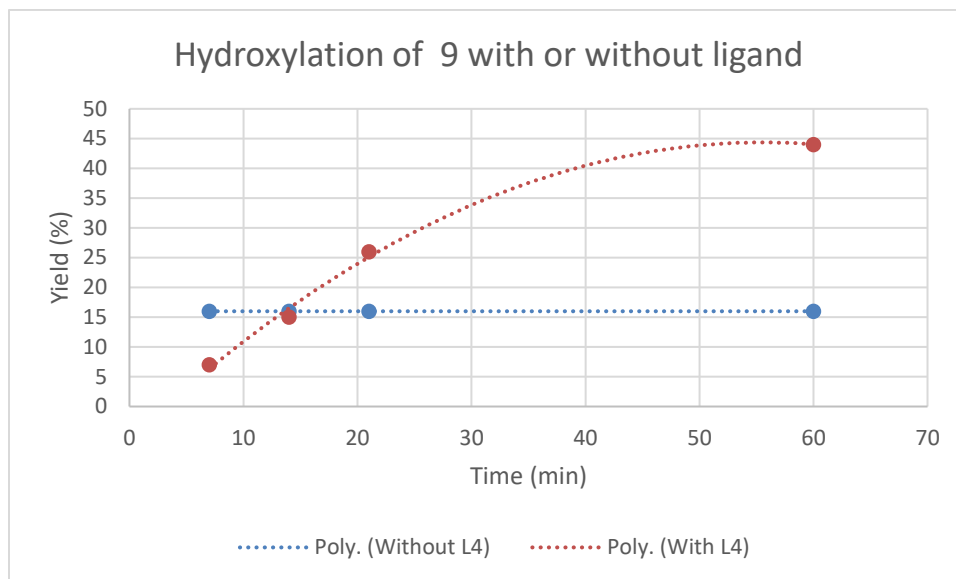

**Fig. S10. Hydroxylation reaction of complex 9**

#### 4.4. Hydrogen Peroxide Decomposition Experiments

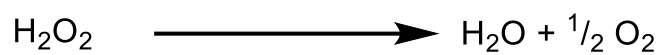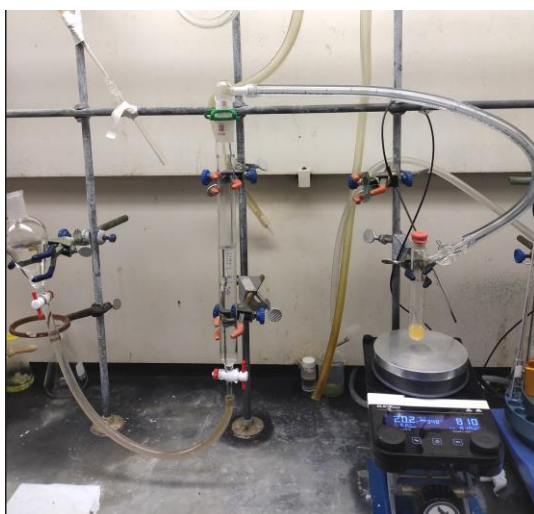

(a) Reaction measuring equipment

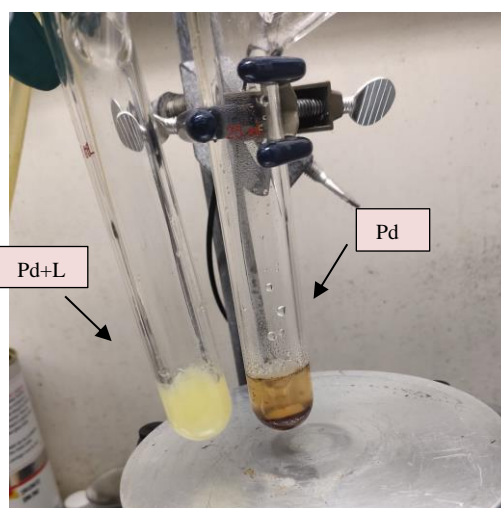

(b) Reaction vials with or w/o ligand after 30 min at r.t.

**Fig. S11. Reaction equipment**

The reactions were carried out in 25 mL Schlenk tubes under the corresponding conditions, Pd(OAc)<sub>2</sub> (4.5 mg, 0.02 mmol, 2 mol%), **L1** or **L4** (0.04 mmol, 4 mol%), K<sub>2</sub>HPO<sub>4</sub> (261 mg, 1.5 mmol, 1.5 equiv.), Phenylacetic acid (S) (136 mg, 1 mmol), DMA (3 mL).

Each reaction mixture solution was stirred for 10 min before H<sub>2</sub>O<sub>2</sub> (35% aq., 0.3 mL, 3.5 mmol, 3.5 equiv.) was added and stirred at r.t or 90 °C. The volume of oxygen was measured by gas volume measuring equipment (Fig. S11) and calibrated by standard volume using syringe. The amount of H<sub>2</sub>O<sub>2</sub> (n) was calculated based on the volume of oxygen evolved (PV<sub>O<sub>2</sub></sub> = nRT, T = 298 K). The obtained average n for two trials were plotted as n vs. time (Fig. S12-S14).

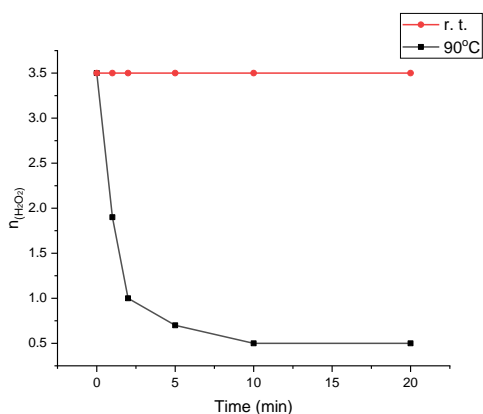

**Fig. S12.** H<sub>2</sub>O<sub>2</sub> decomposition experiments with **L1**  
(Condition: Pd + K<sub>2</sub>HPO<sub>4</sub> + **L1** + S)

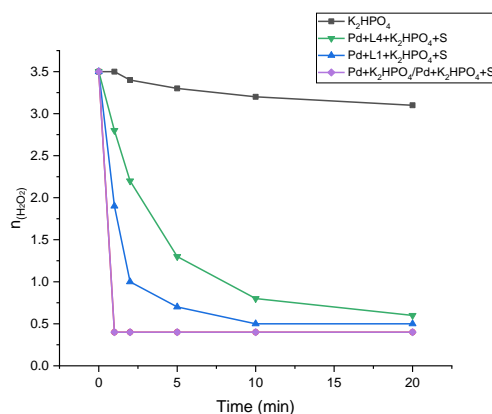

**Fig. S13.** H<sub>2</sub>O<sub>2</sub> decomposition at 90 °C

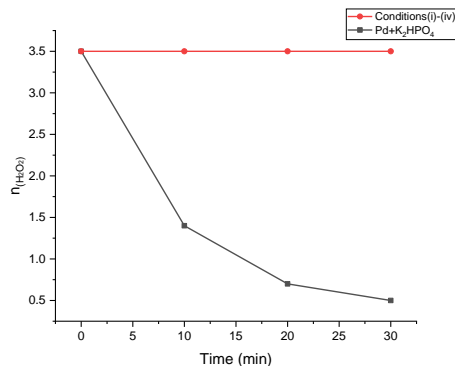

**Fig. S14.** H<sub>2</sub>O<sub>2</sub> decomposition at room temperature

Condition (i): K<sub>2</sub>HPO<sub>4</sub>  
 Condition (ii): Pd + K<sub>2</sub>HPO<sub>4</sub> + **L1**  
 Condition (iii): Pd + K<sub>2</sub>HPO<sub>4</sub> + **L4**  
 Condition (iv): Pd + K<sub>2</sub>HPO<sub>4</sub> + S

## 5. References:

1. Schiefer, I. T. *et al.* Inhibition of Amyloidogenesis by Nonsteroidal Anti-inflammatory Drugs and Their Hybrid Nitrates. *J. Med. Chem.* **54**, 2293-2306 (2011).
2. Wang, H. F. *et al.* Nickel-Catalyzed Reductive Csp<sup>2</sup>-Csp<sup>3</sup> Cross Coupling Using Phosphonium Salts. *Org. Lett.* **23**, 8183-8188 (2021).
3. Jin, M., Ren, W., Qian, D. W. & Yang, S. D. Direct Allylic C(sp<sup>3</sup>)-H Alkylation with 2-Naphthols via Cooperative Palladium and Copper Catalysis: Construction of Cyclohexadienones with Quaternary Carbon Centers. *Org. Lett.* **20**, 7015-7019 (2018).
4. Cheng, X. F. *et al.* Pd(II)-Catalyzed Enantioselective C-H Activation/C-O Bond Formation: Synthesis of Chiral Benzofuranones. *J. Am. Chem. Soc.* **135**, 1236-1239 (2013).
5. Ameen, D. & Snape, T. J. Developing the Scope of O-C Aryl Migrations: Exploring Amide Substrates as Potential Precursors for Asymmetric Reactions. *Eur. J. Org. Chem.* **2014**, 1925-1934 (2014).
6. Asai, S., Kato, M., Monguchi, Y., Sajiki, H. & Sawama, Y. Cyclic ether synthesis from diols using trimethyl phosphate. *Chem. Commun.* **53**, 4787-4790 (2017).
7. Liu, J. H. *et al.* Copper-Catalyzed Reductive Cross-Coupling of Nonactivated Alkyl Tosylates and Mesylates with Alkyl and Aryl Bromides. *Chem.-Eur. J.* **20**, 15334-15338 (2014).
8. Biosca, M., Magre, M., Coll, M., Pamies, O. & Dieguez, M. Alternatives to Phosphinooxazoline (t-BuPHOX) Ligands in the Metal-Catalyzed Hydrogenation of Minimally Functionalized Olefins and Cyclic beta-Enamides. *Adv. Synth. Catal.* **359**, 2801-2814 (2017).
9. Wahlgren, C. G. & Addison, A. W. Synthesis of Some Benzimidazole-Derived Pyridine-Derived and Imidazole-Derived Chelating-Agents. *J. Heterocyclic. Chem.* **26**, 541-543 (1989).

10. Giri, R. & Yu, J. Q. Synthesis of 1,2- and 1,3-Dicarboxylic Acids via Pd(II)-Catalyzed Carboxylation of Aryl and Vinyl C–H Bonds. *J. Am. Chem. Soc.* **130**, 14082-14083 (2008).

# NMR Spectra

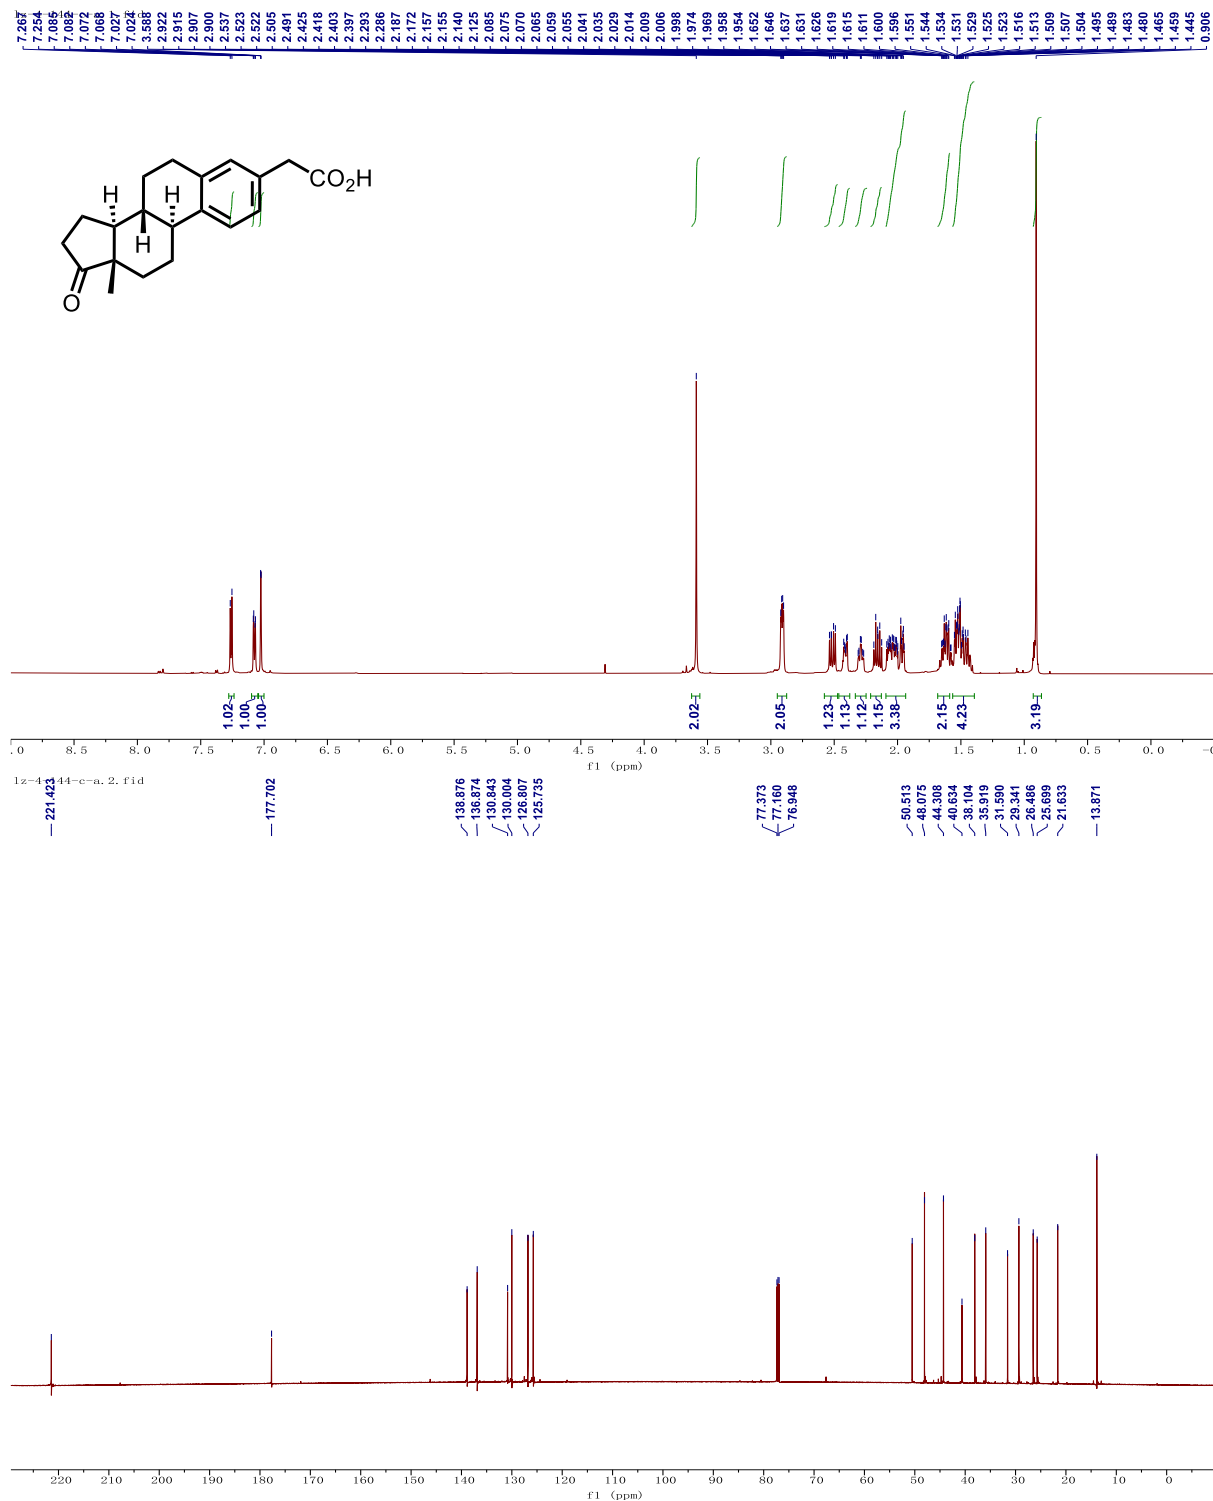

NMR Spectra of **1al**

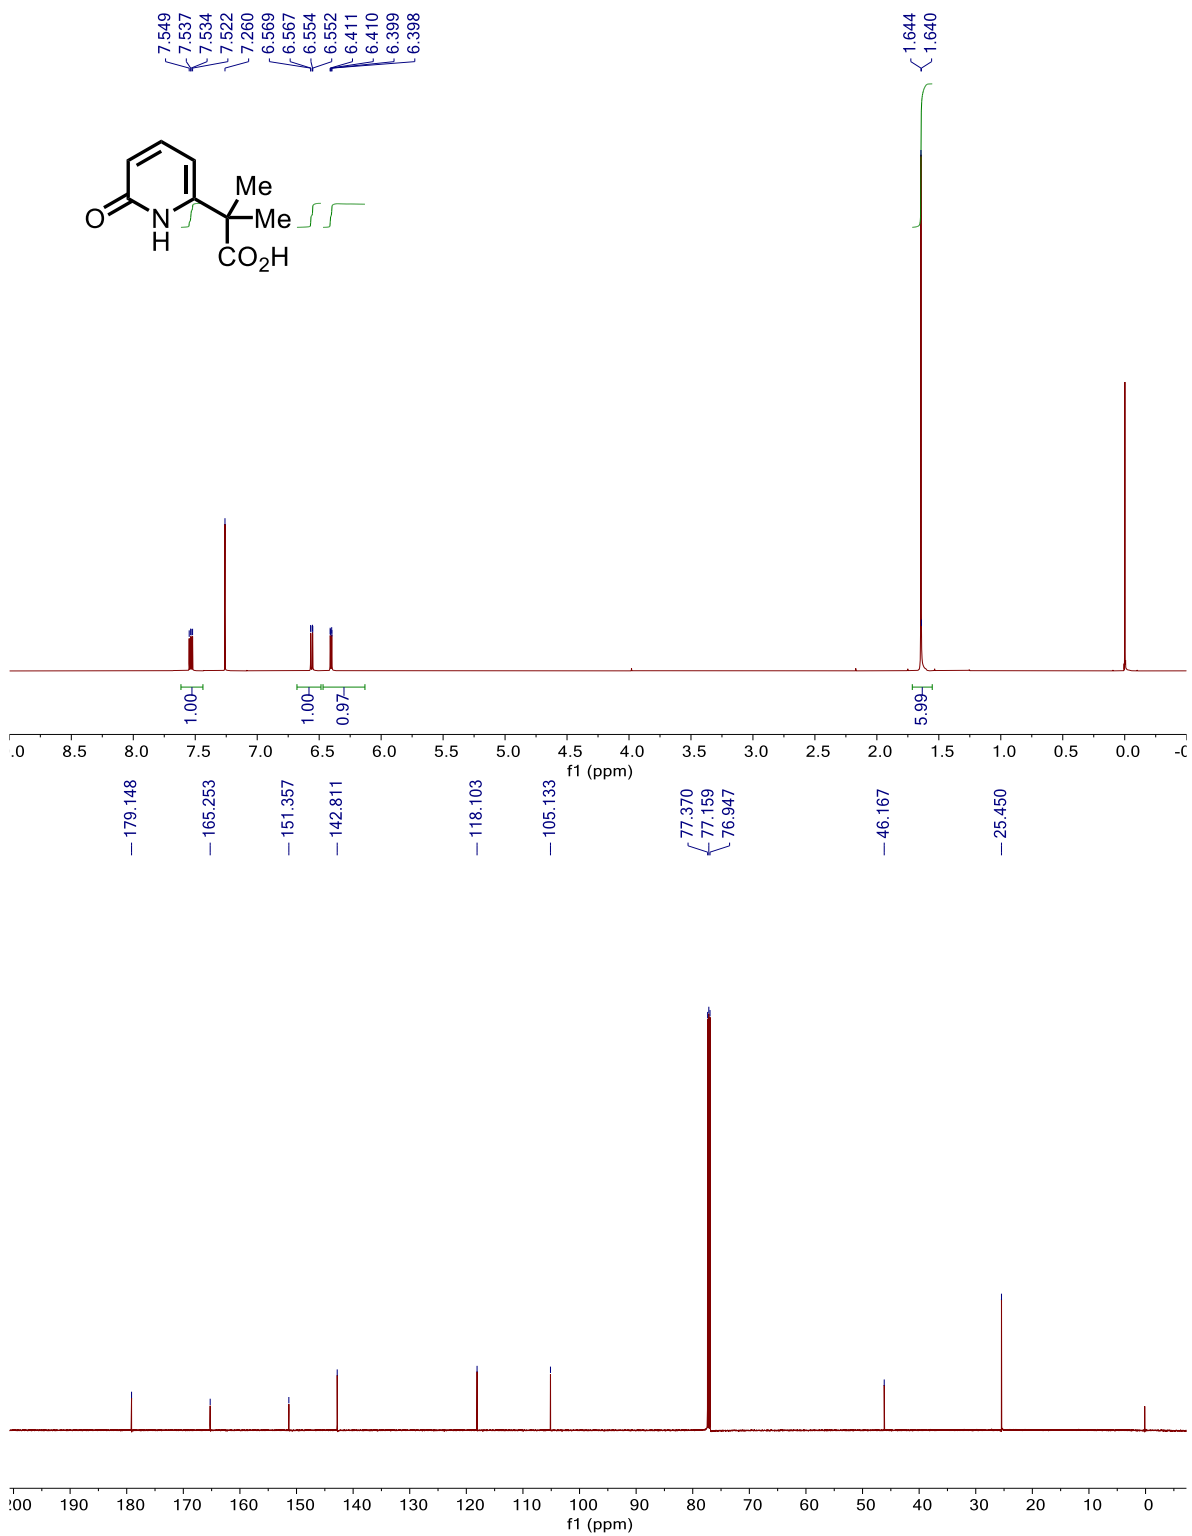

NMR Spectra of L4



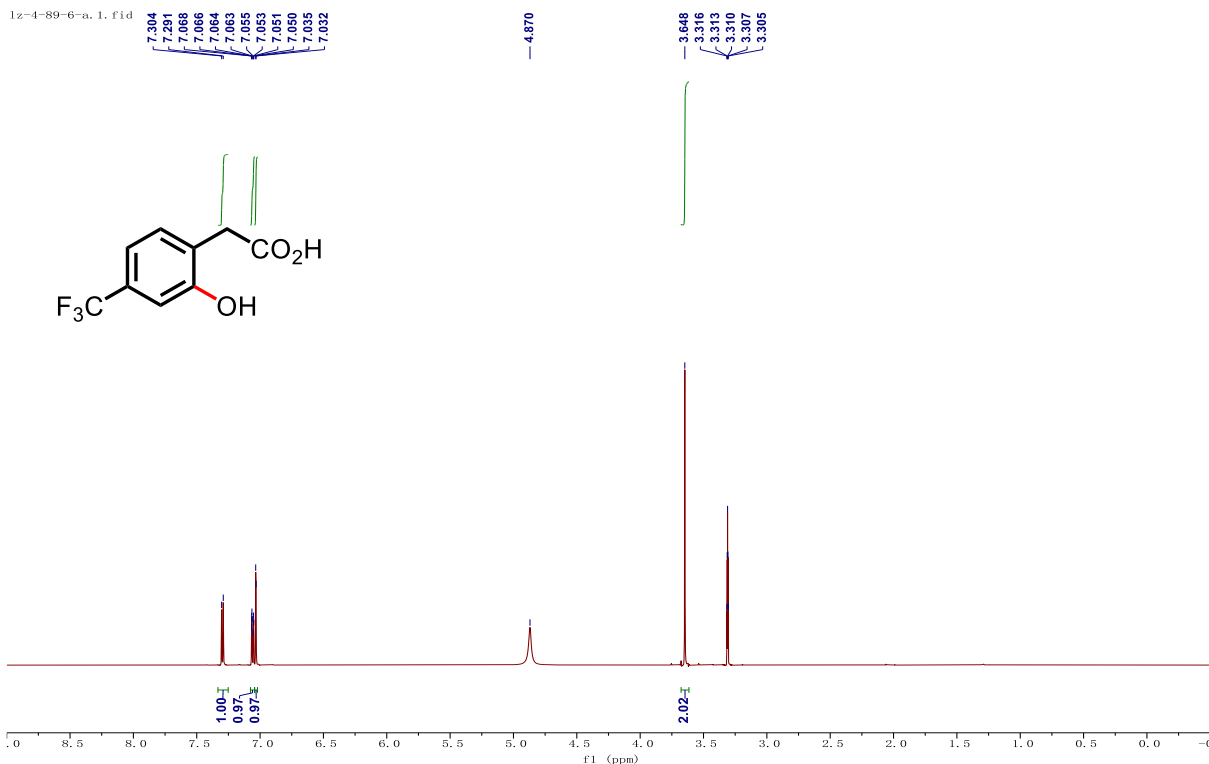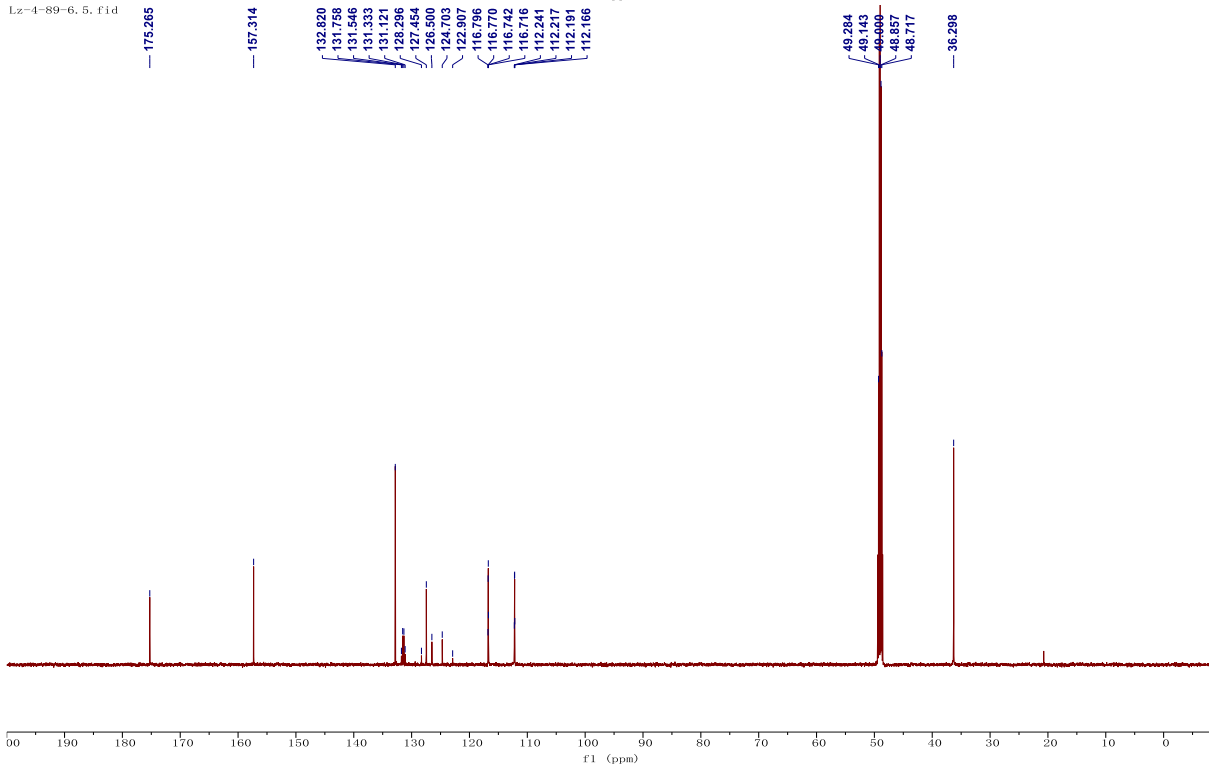

NMR Spectra of 2a

1z-4-89-6-f. 1. fid

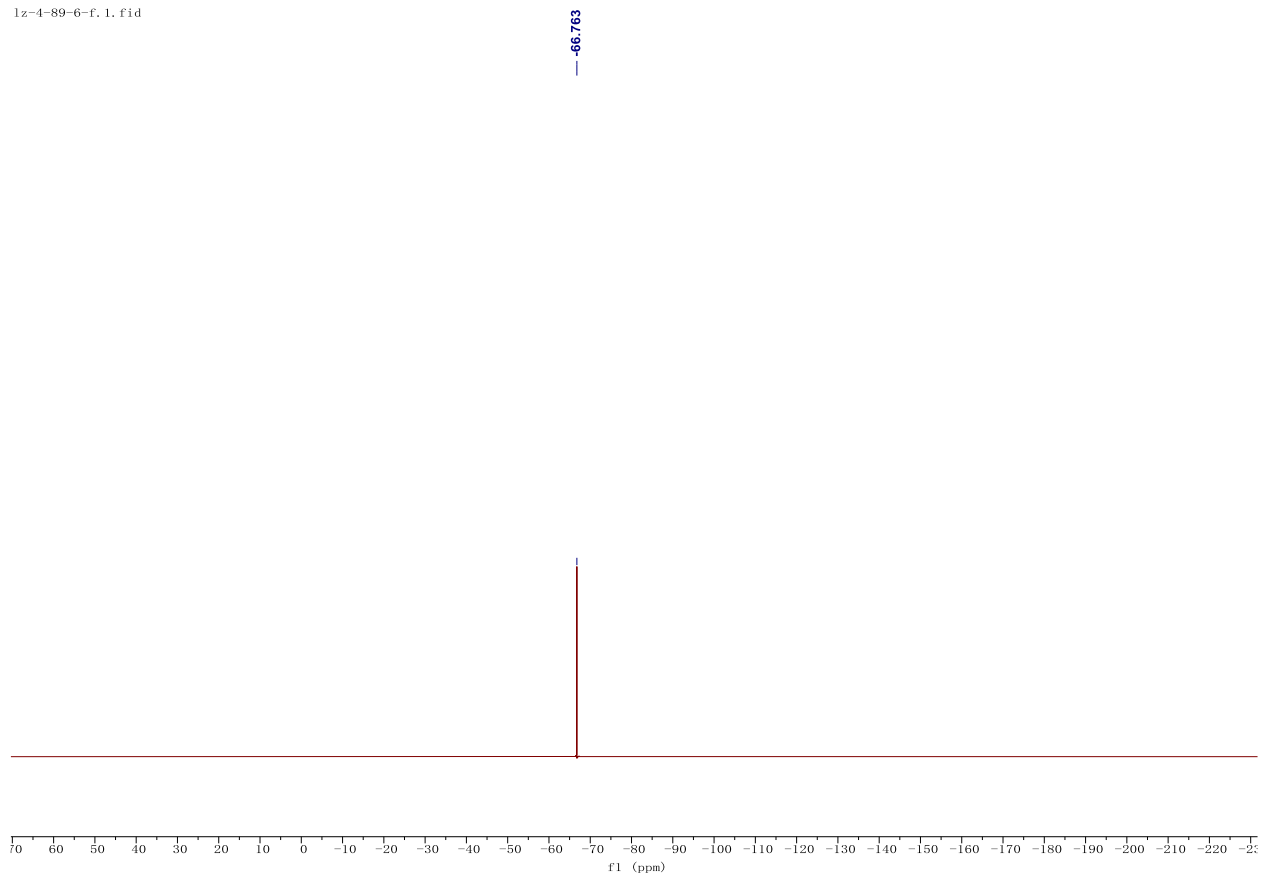

Lz-4-81-8-1.1.fid

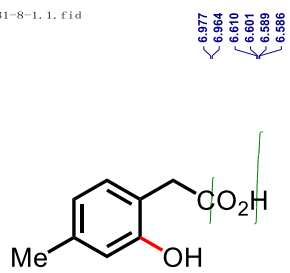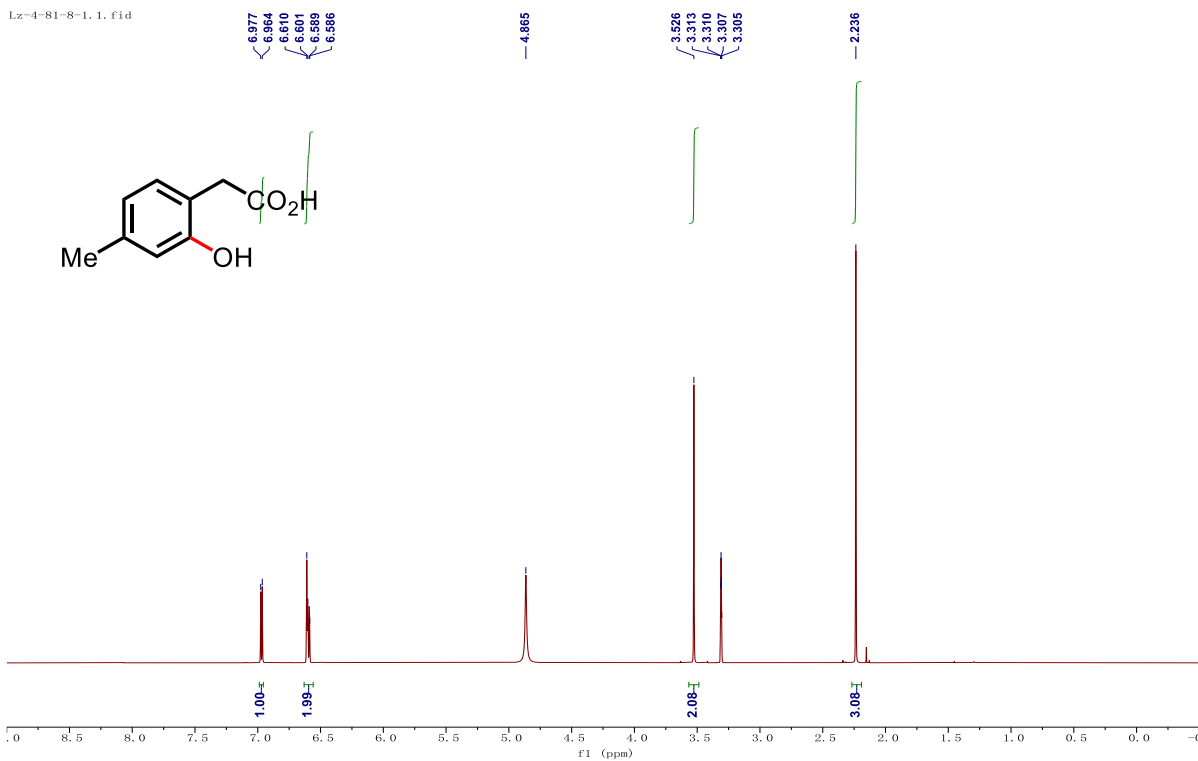

Lz-4-81-8-1.2.fid

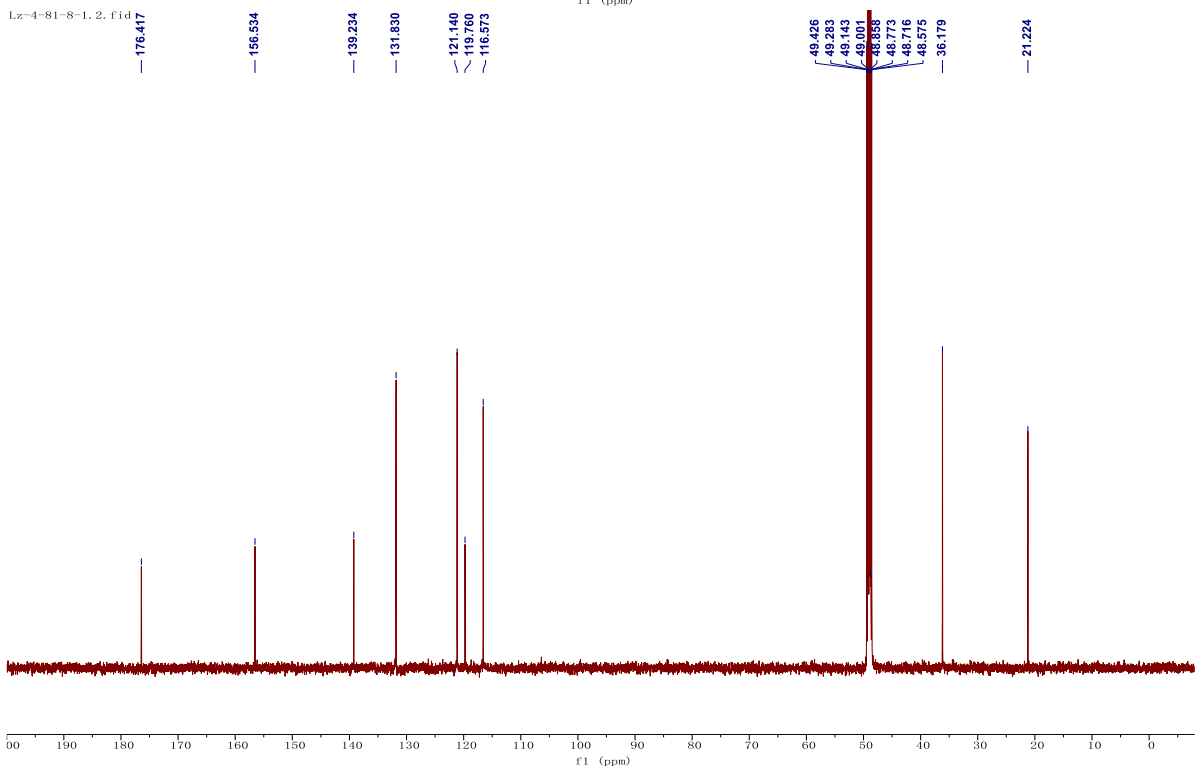

NMR Spectra of 2b

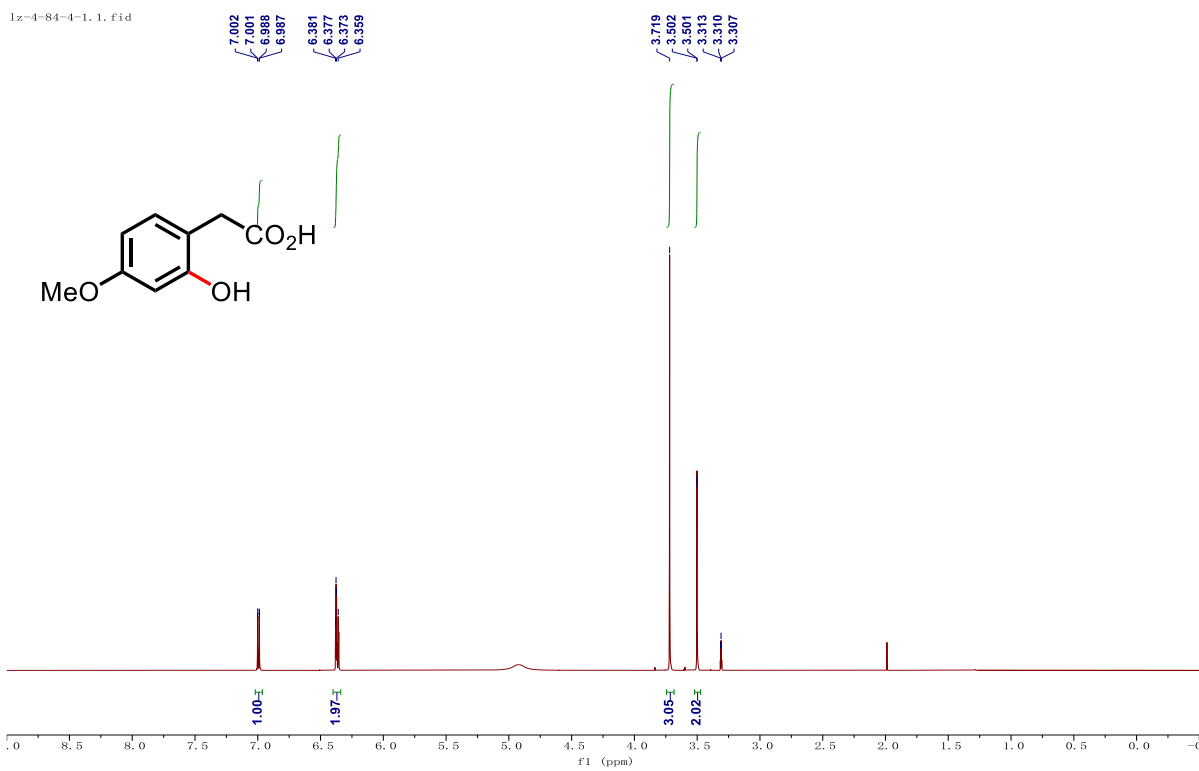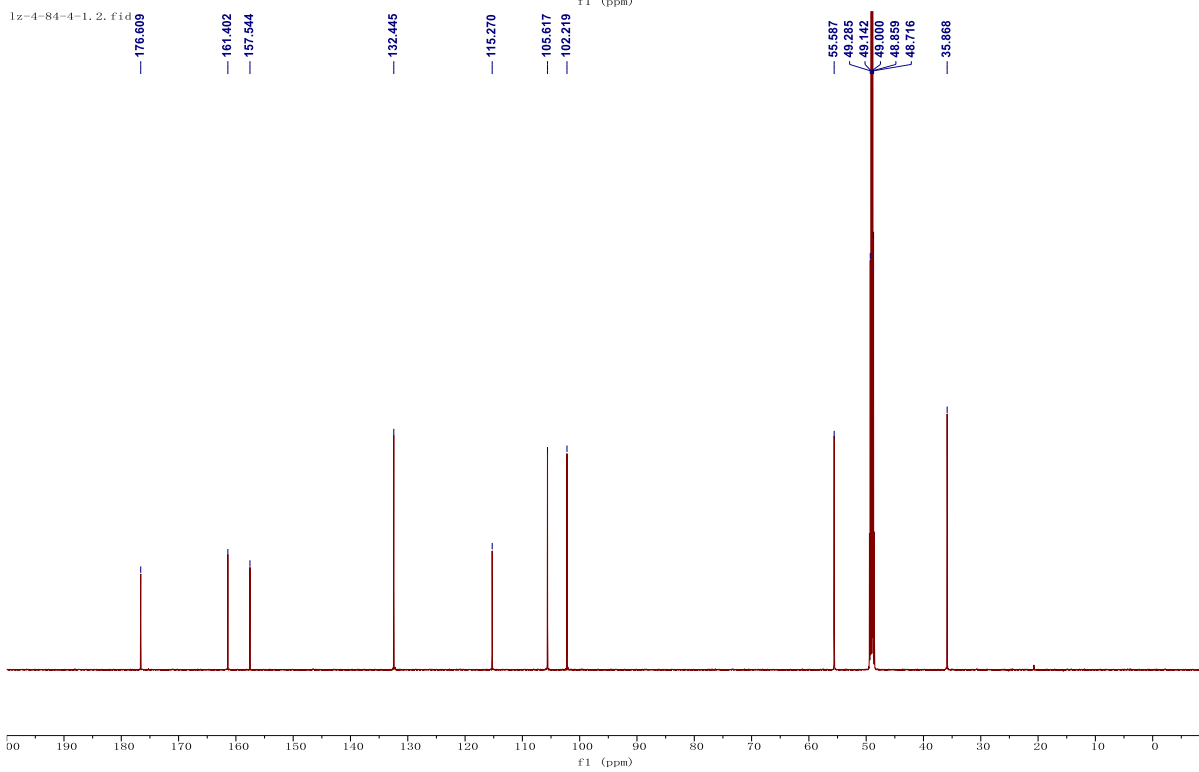

NMR Spectra of 2c

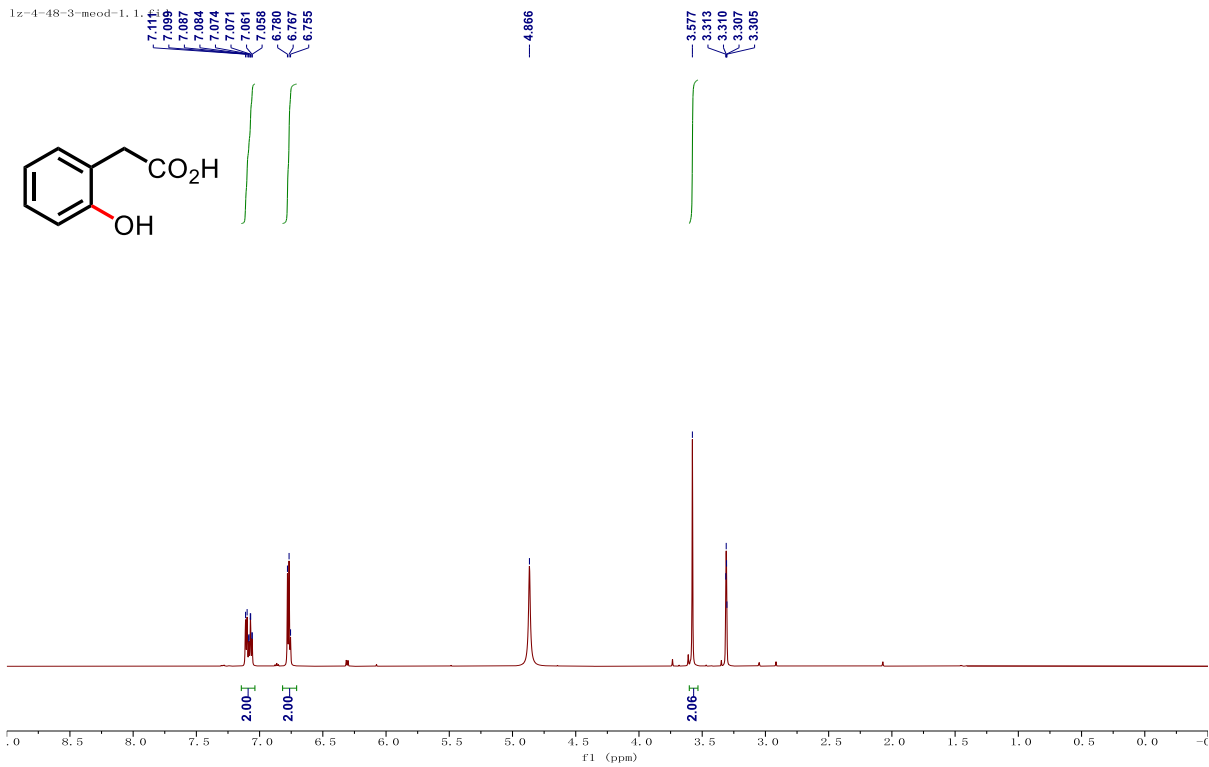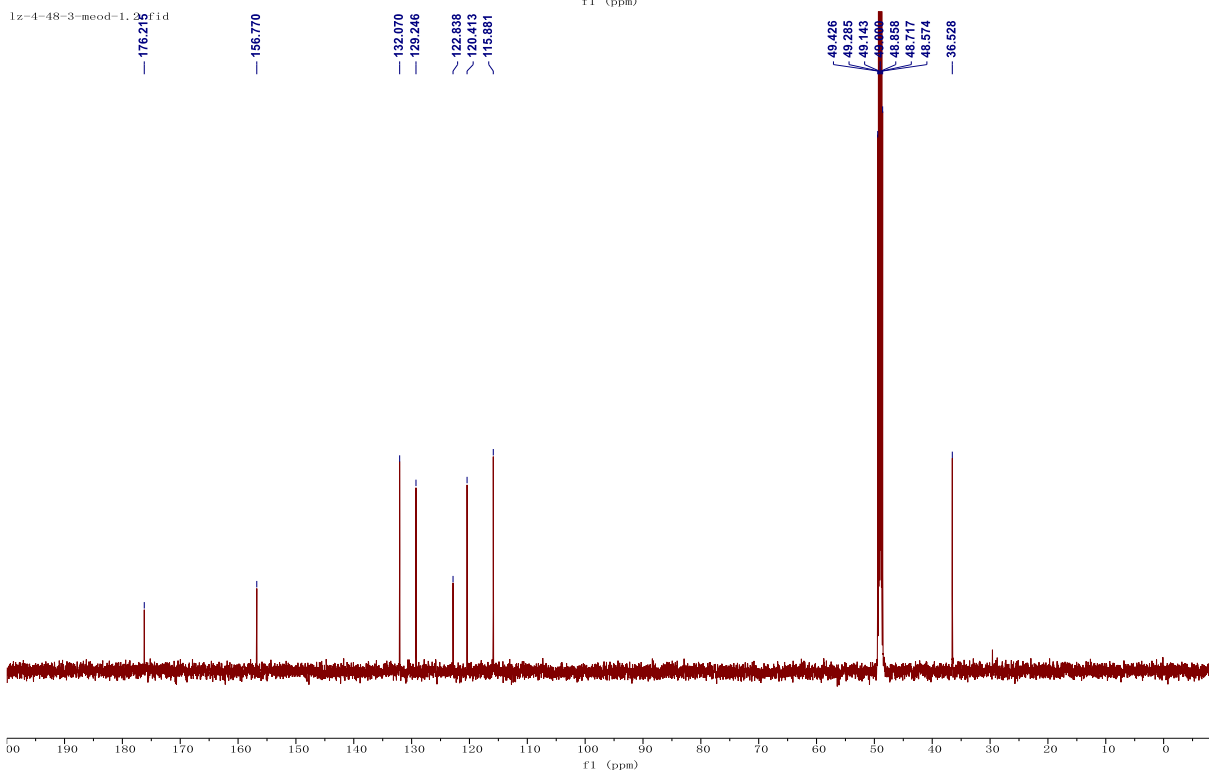

NMR Spectra of 2d

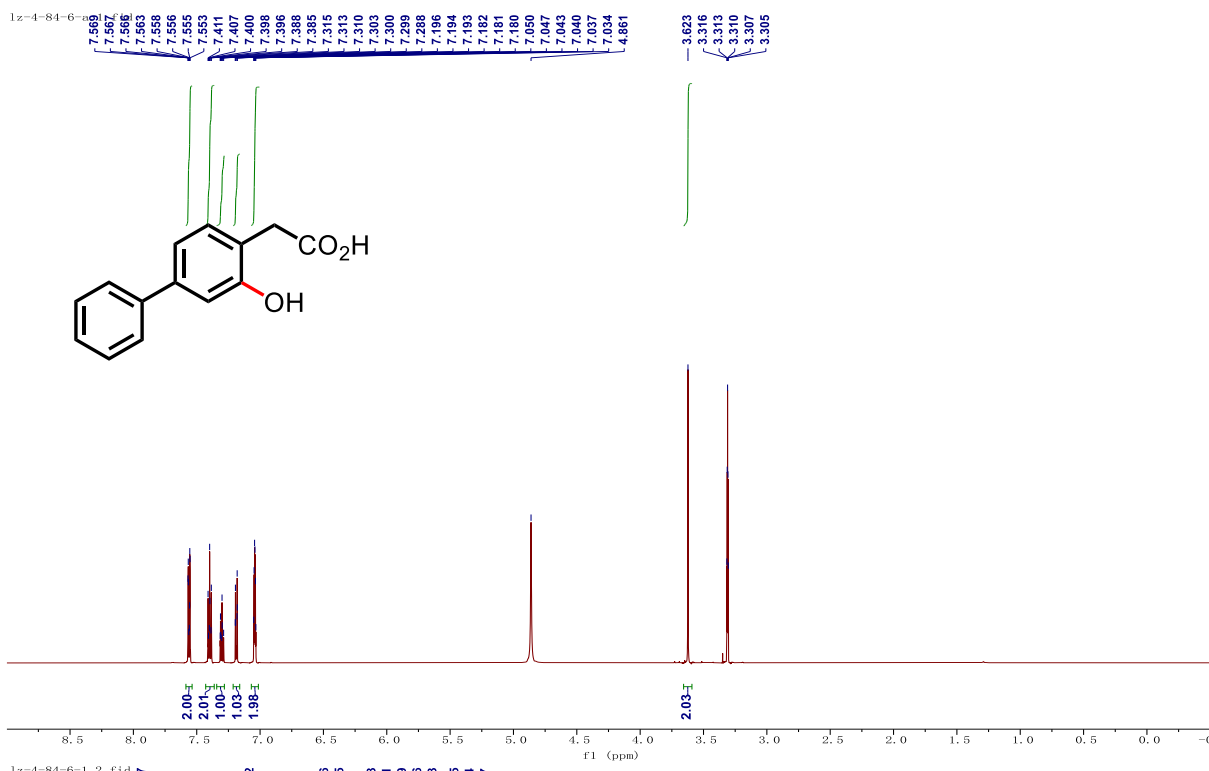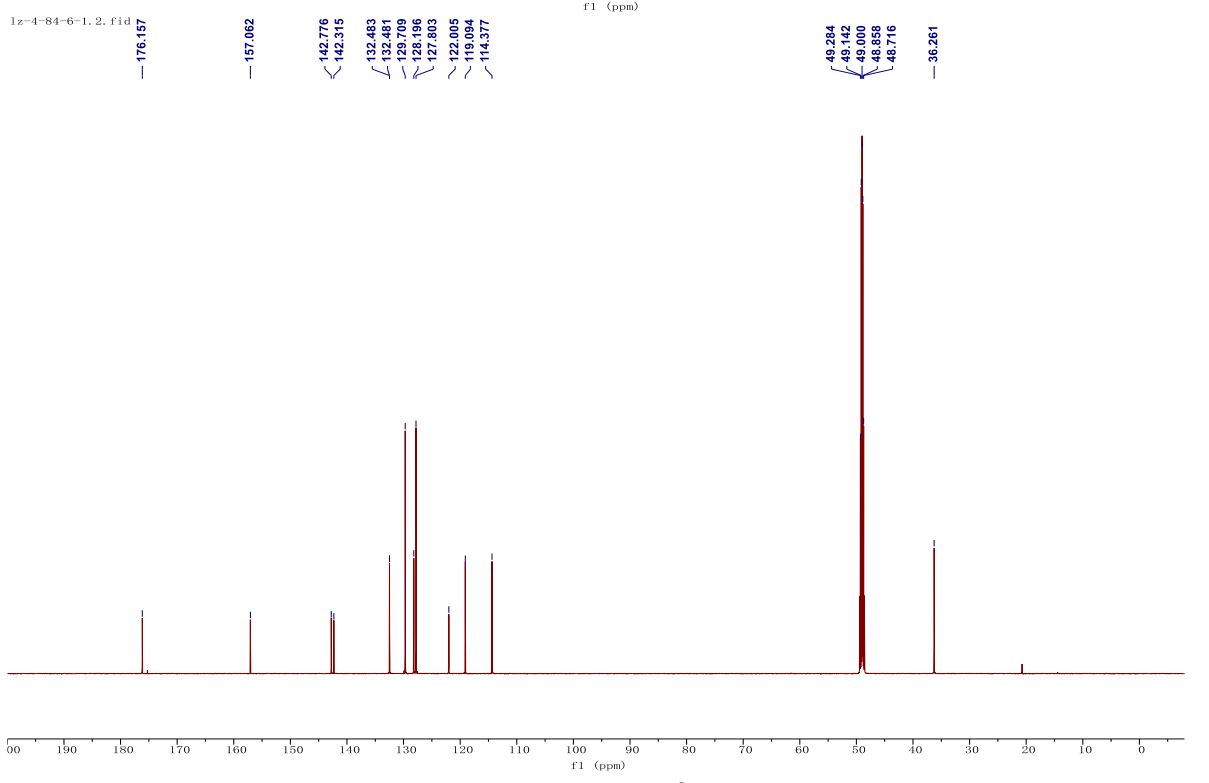

NMR Spectra of 2e

1z-4-81-7-1.1.fid

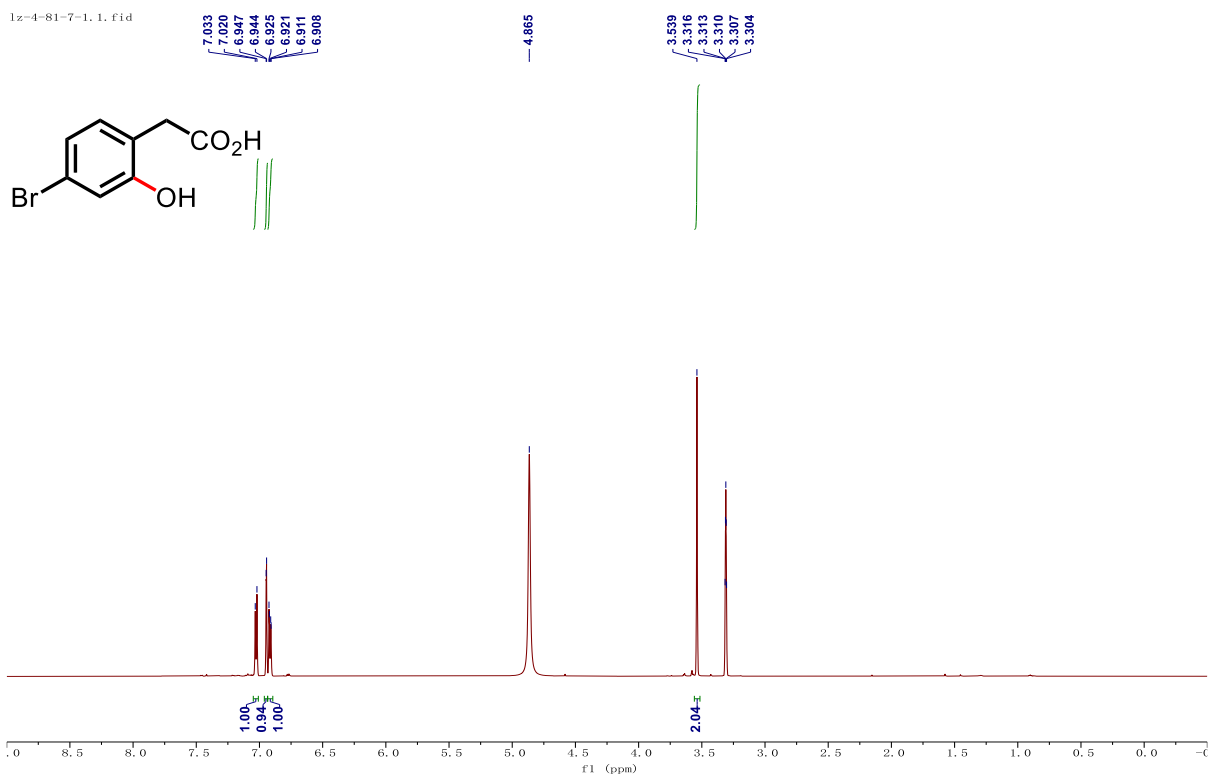

1z-4-81-7-1.2.fid

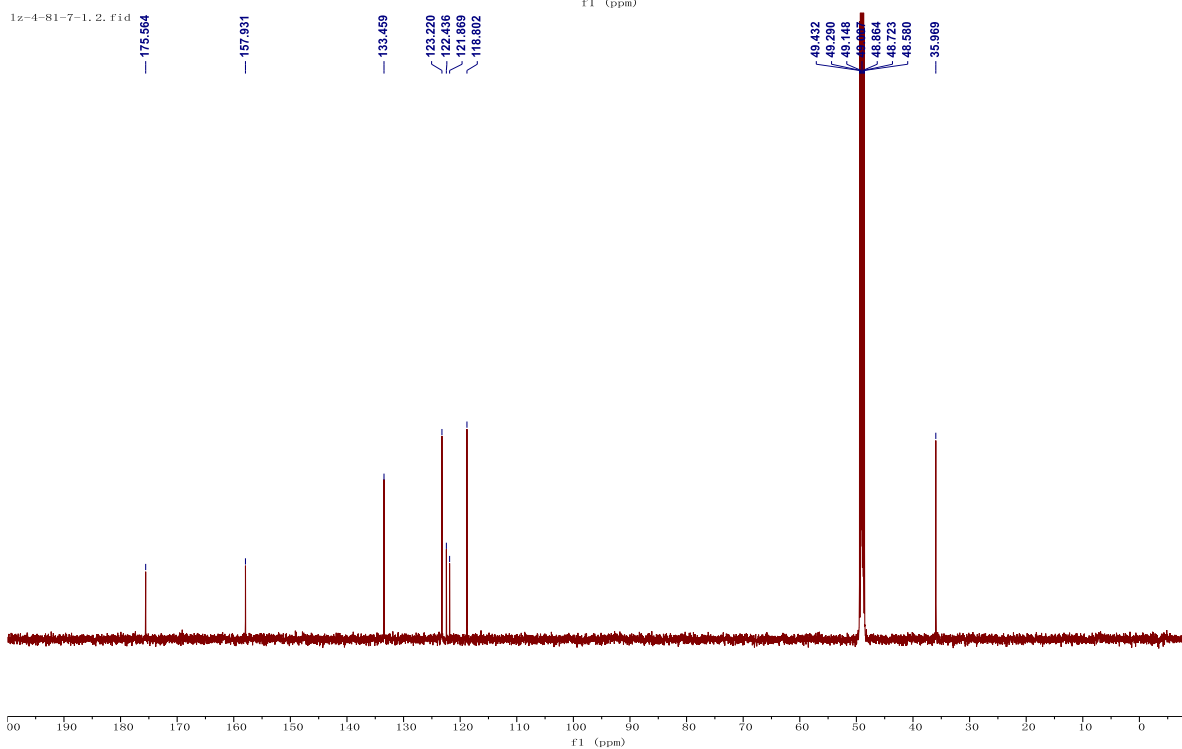

NMR Spectra of 2f

1z-4-89-7-1.1.fid

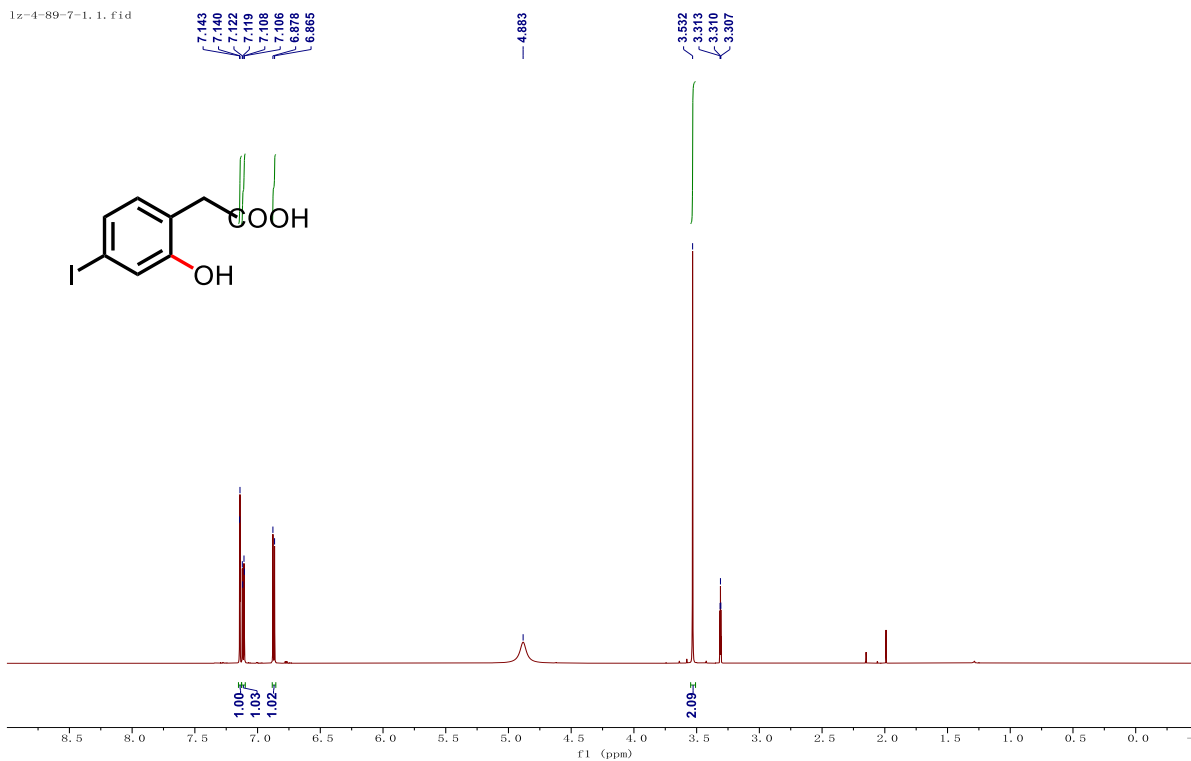

1z-4-89-7-1.2.fid

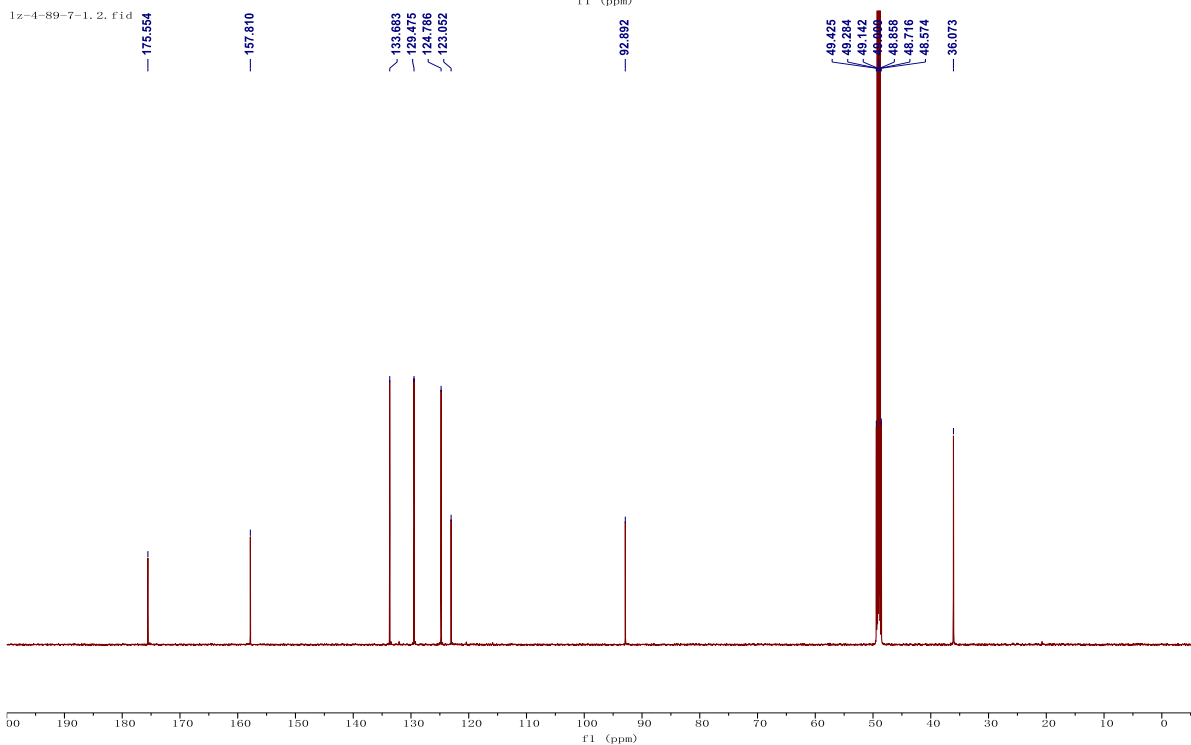

NMR Spectra of 2g



Lz-4-81-13-1.1.fid

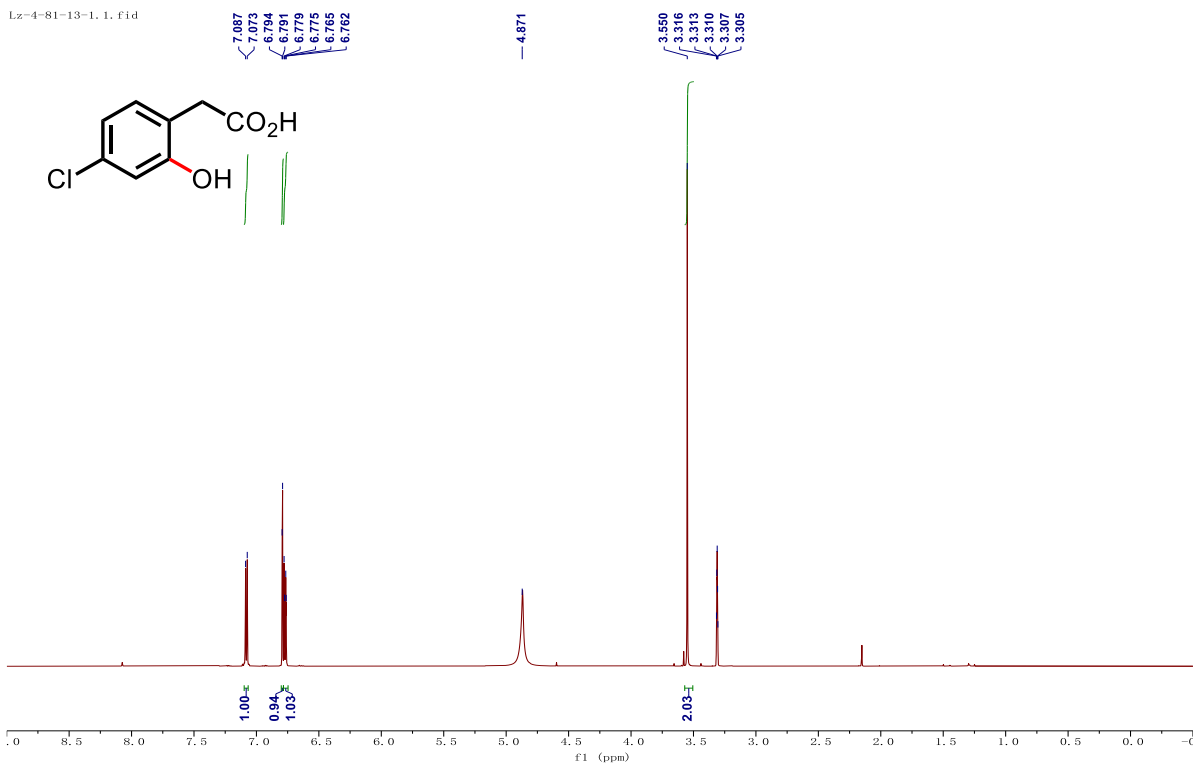

Lz-4-81-13-1.2.fid

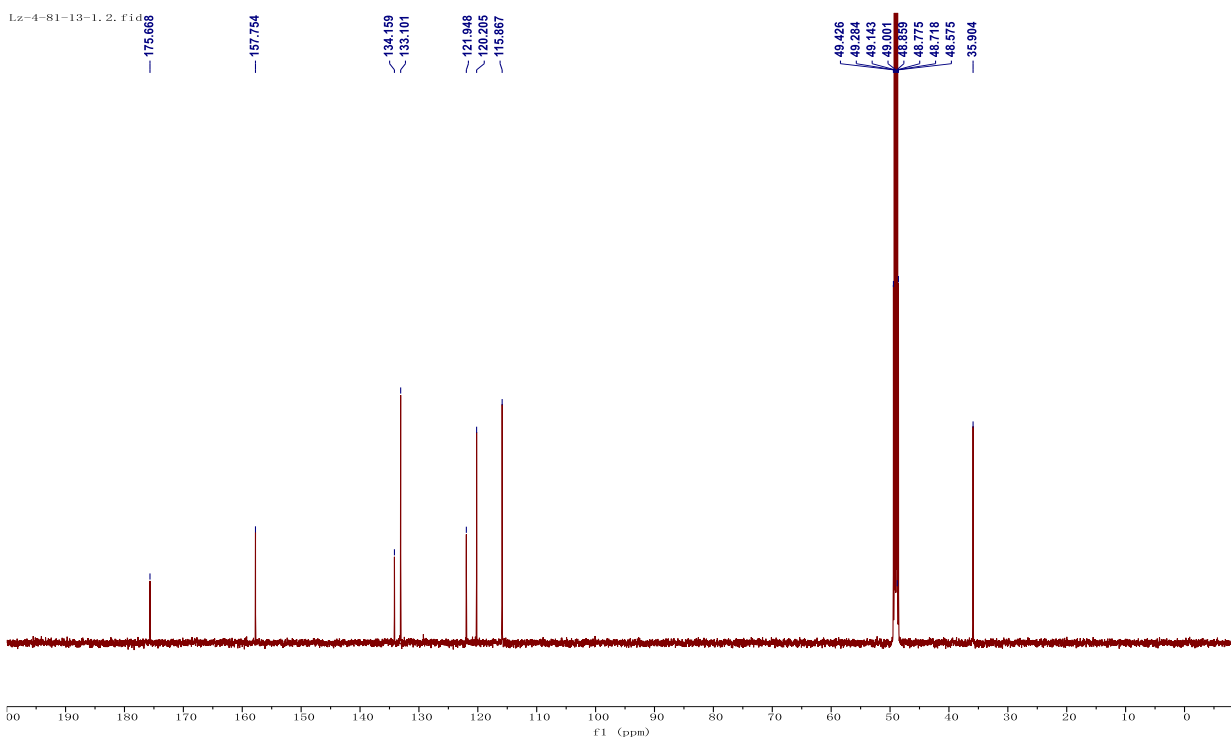

NMR Spectra of 2h

1z-4-89-8-a.1.fid

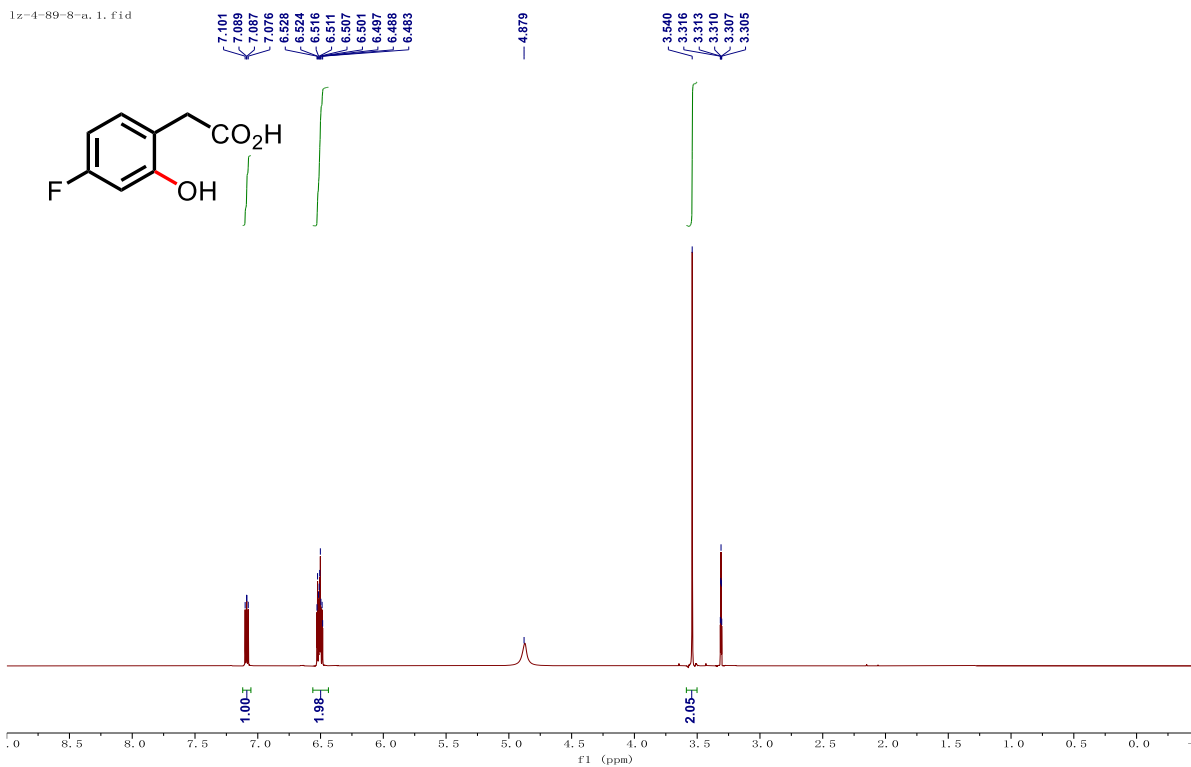

1z-4-89-8-1.3.fid

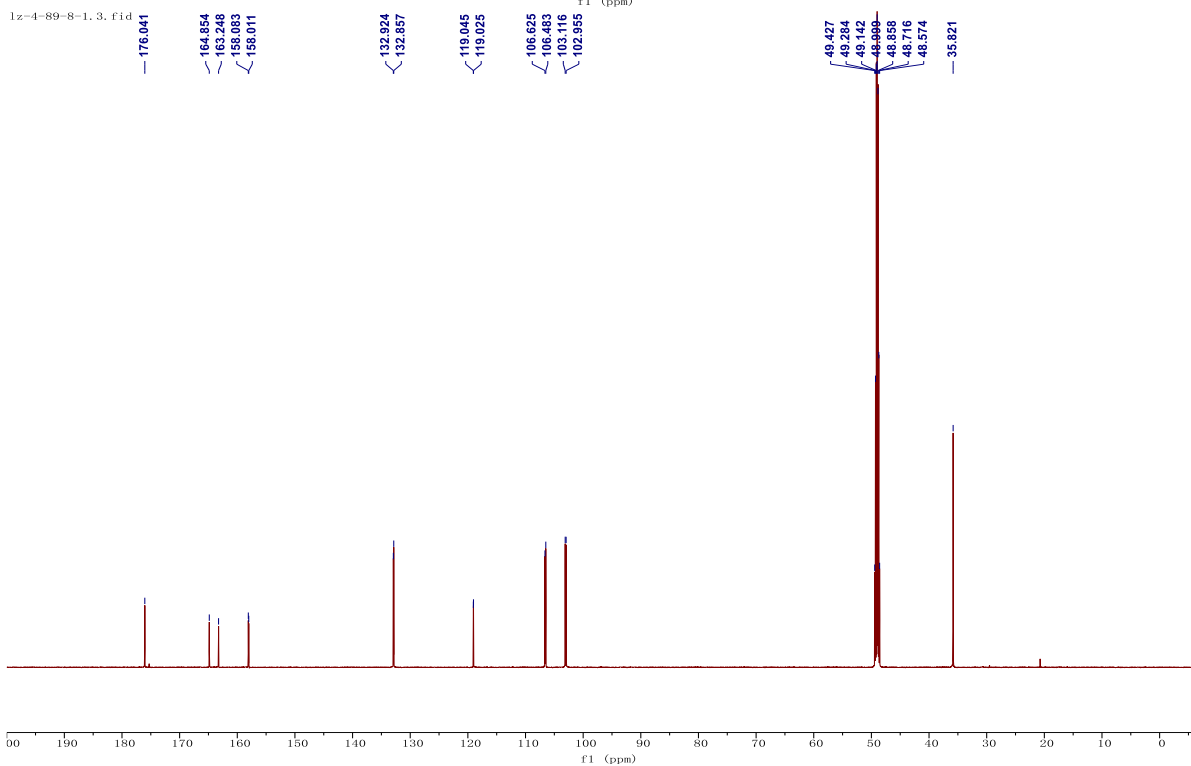

NMR Spectra of **2i**

1z-4-89-8-f. 1. fid

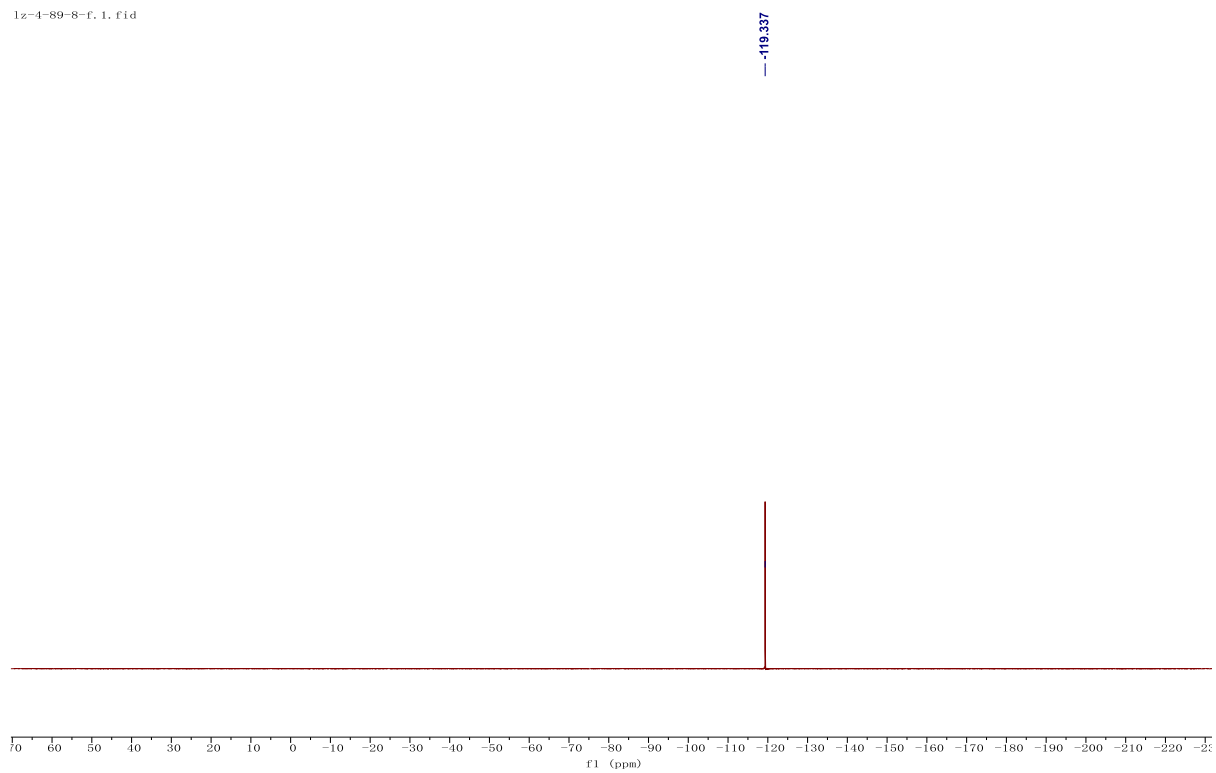

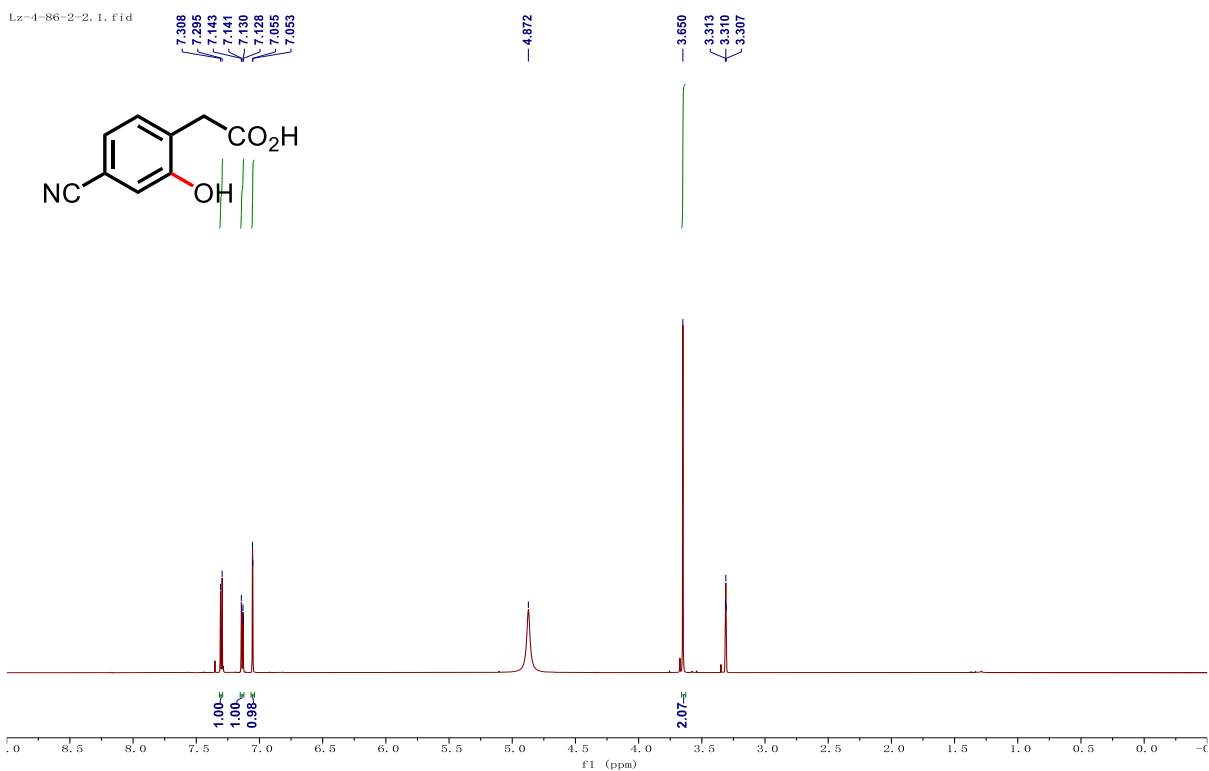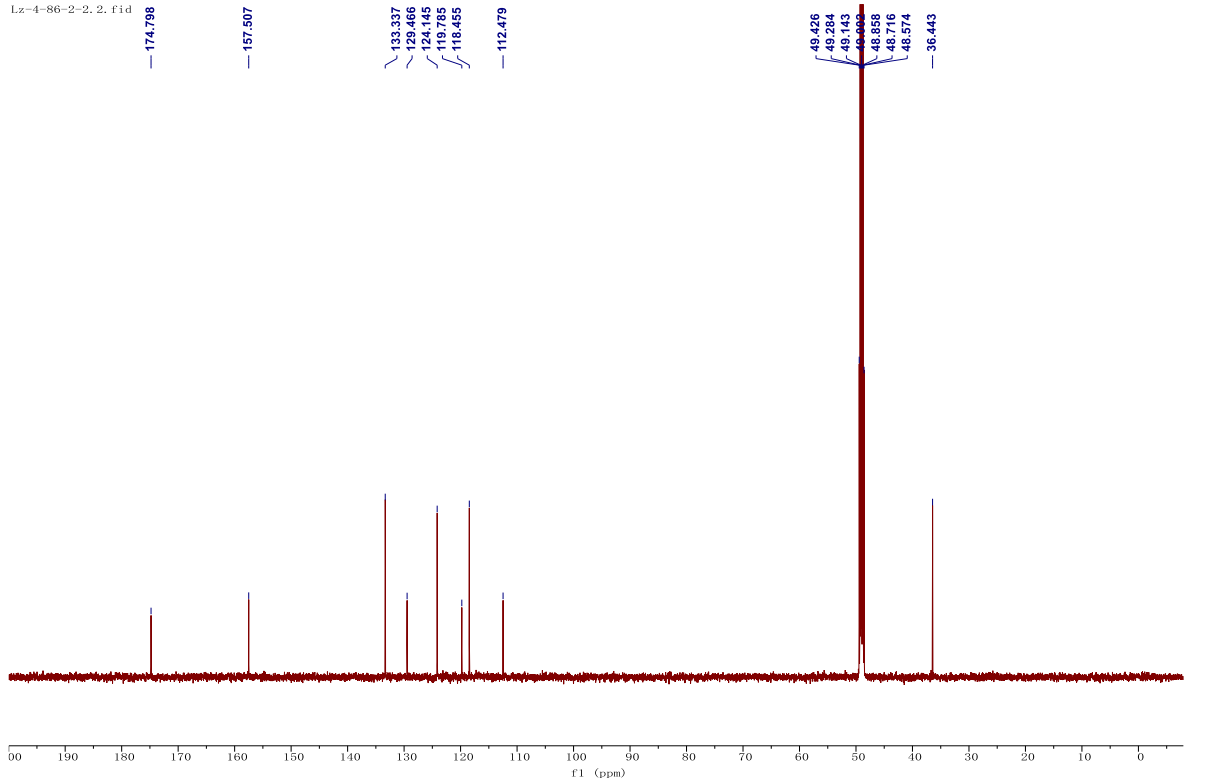

NMR Spectra of 2j

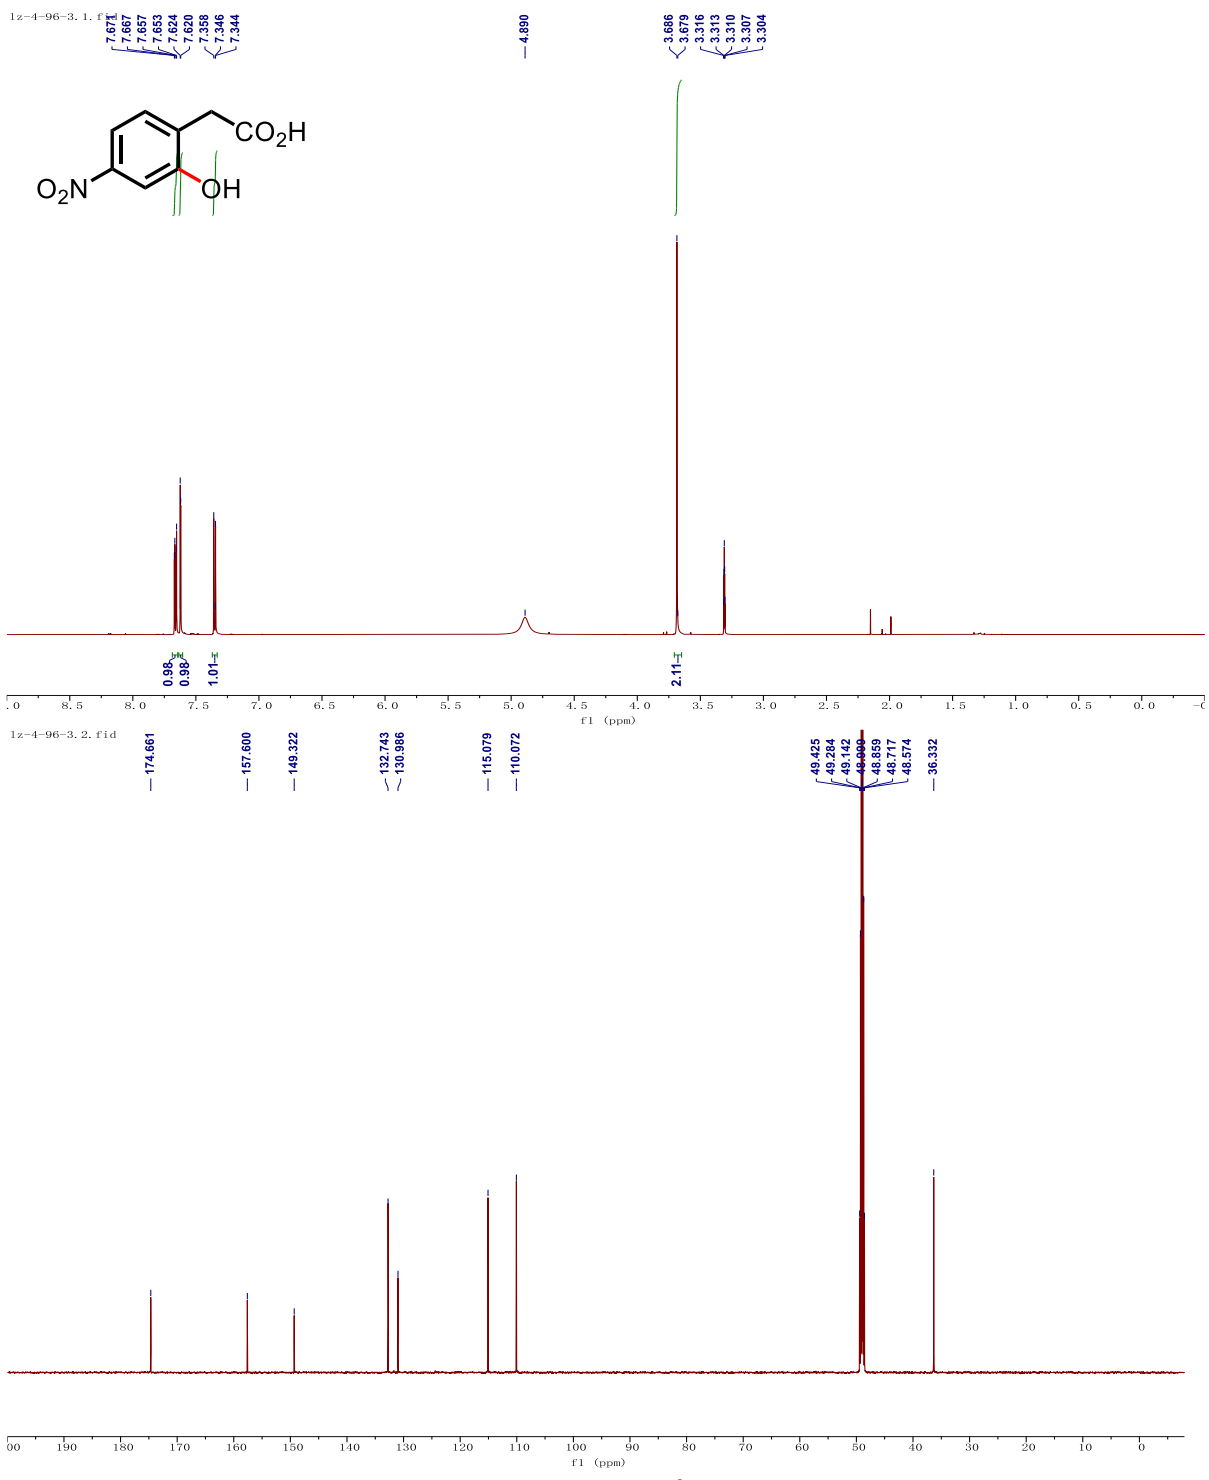

NMR Spectra of **2k**

lz-4-81-1-1.1.fid

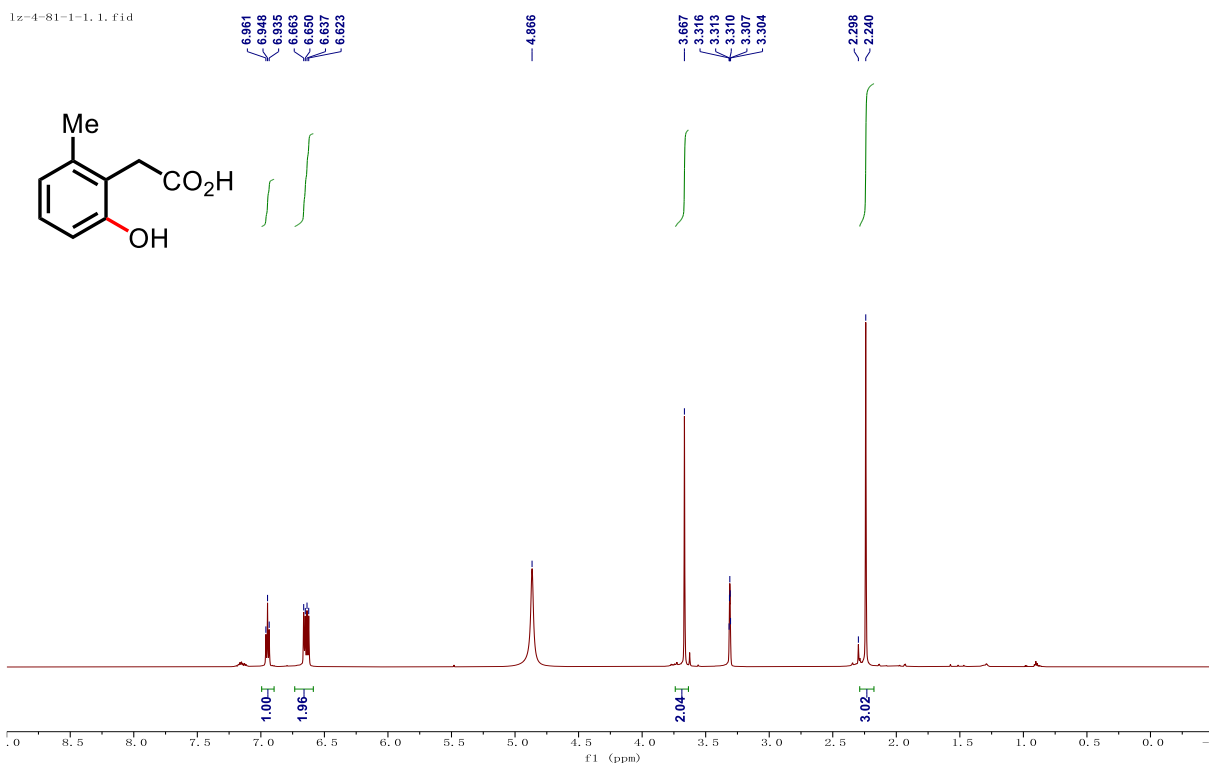

lz-4-81-1-1.2.fid

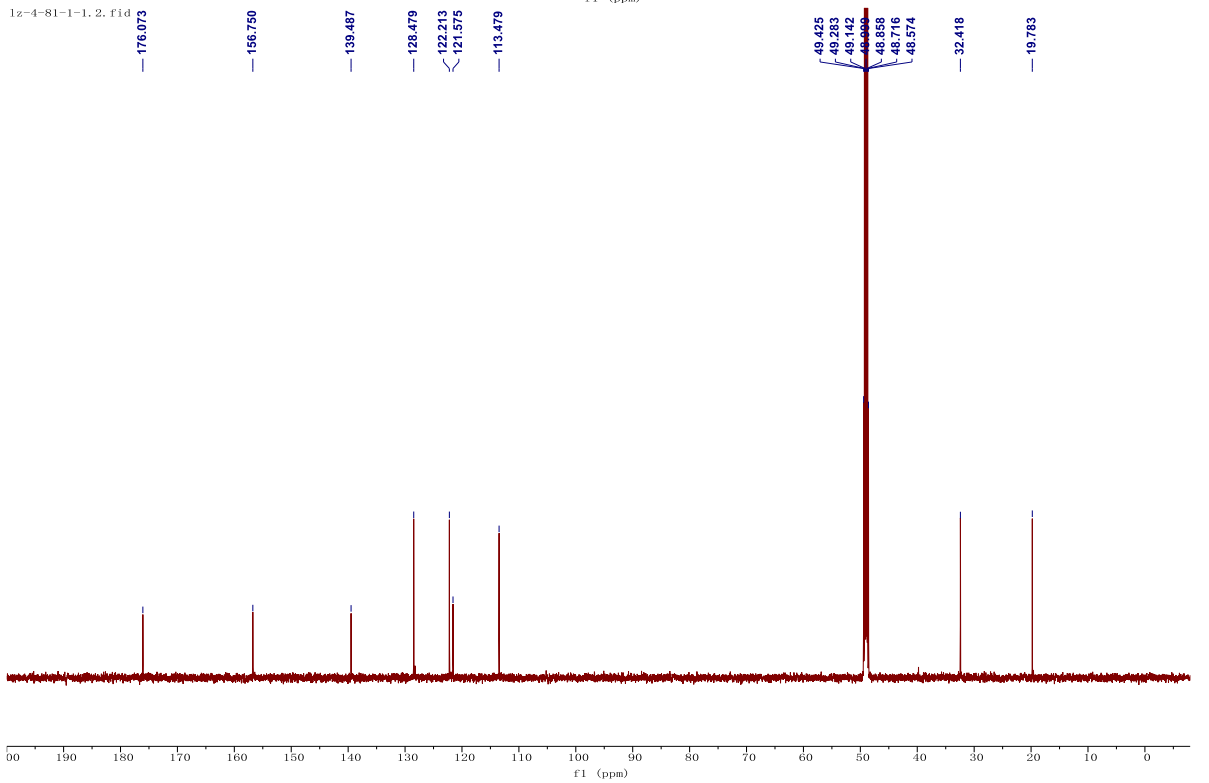

NMR Spectra of 21

lz-4-96-4.1.fid

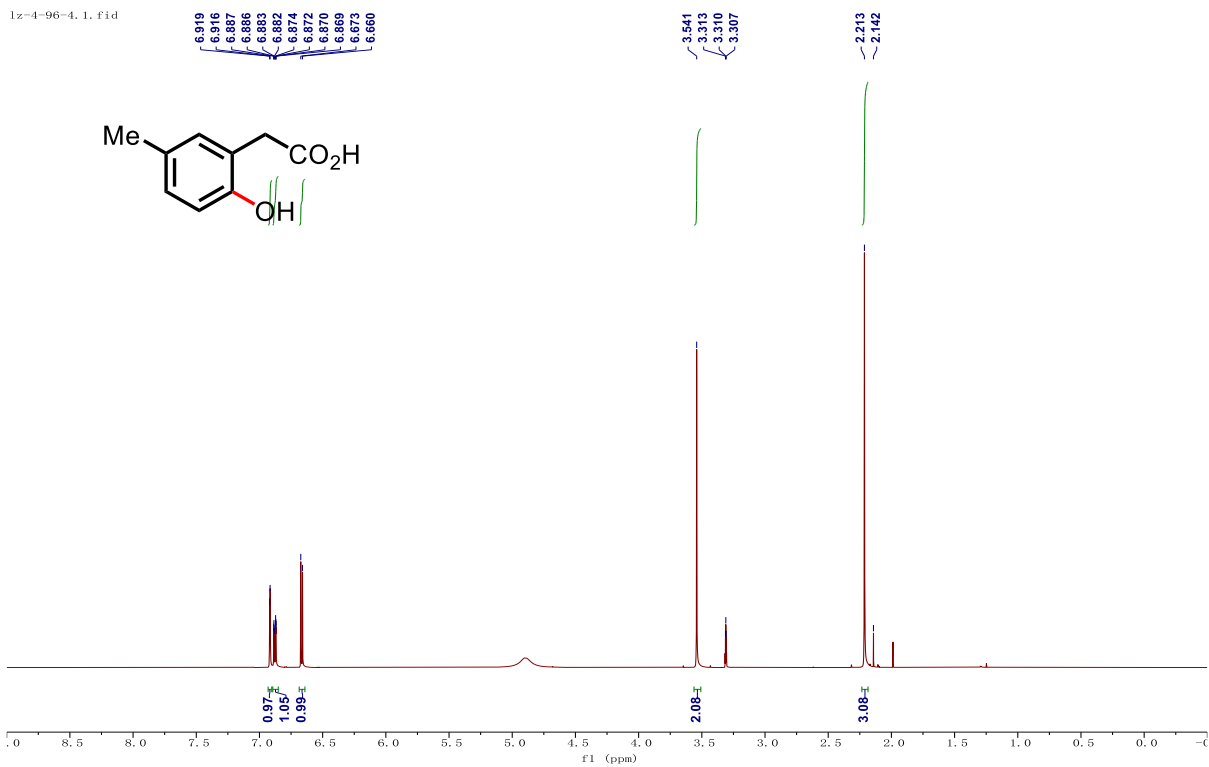

lz-4-96-4.2.fid

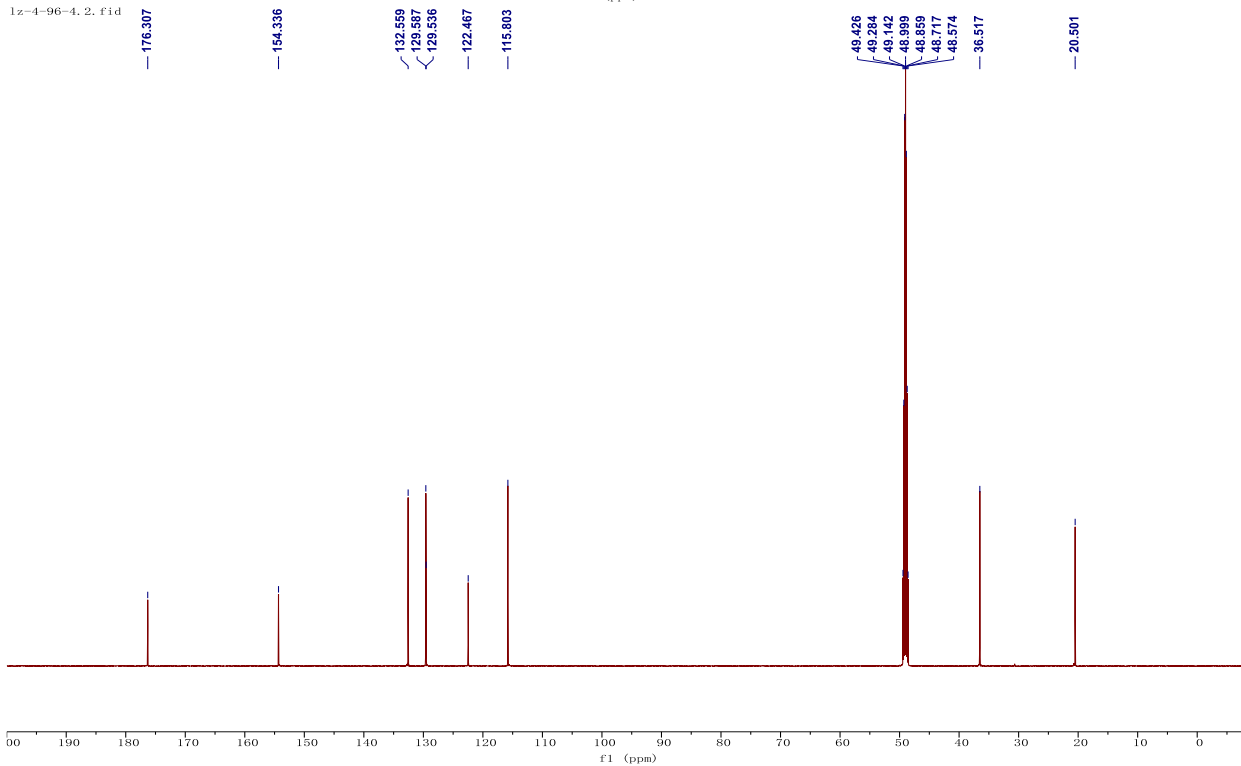

NMR Spectra of **2m**

Lz-4-90-1-2.1.fid

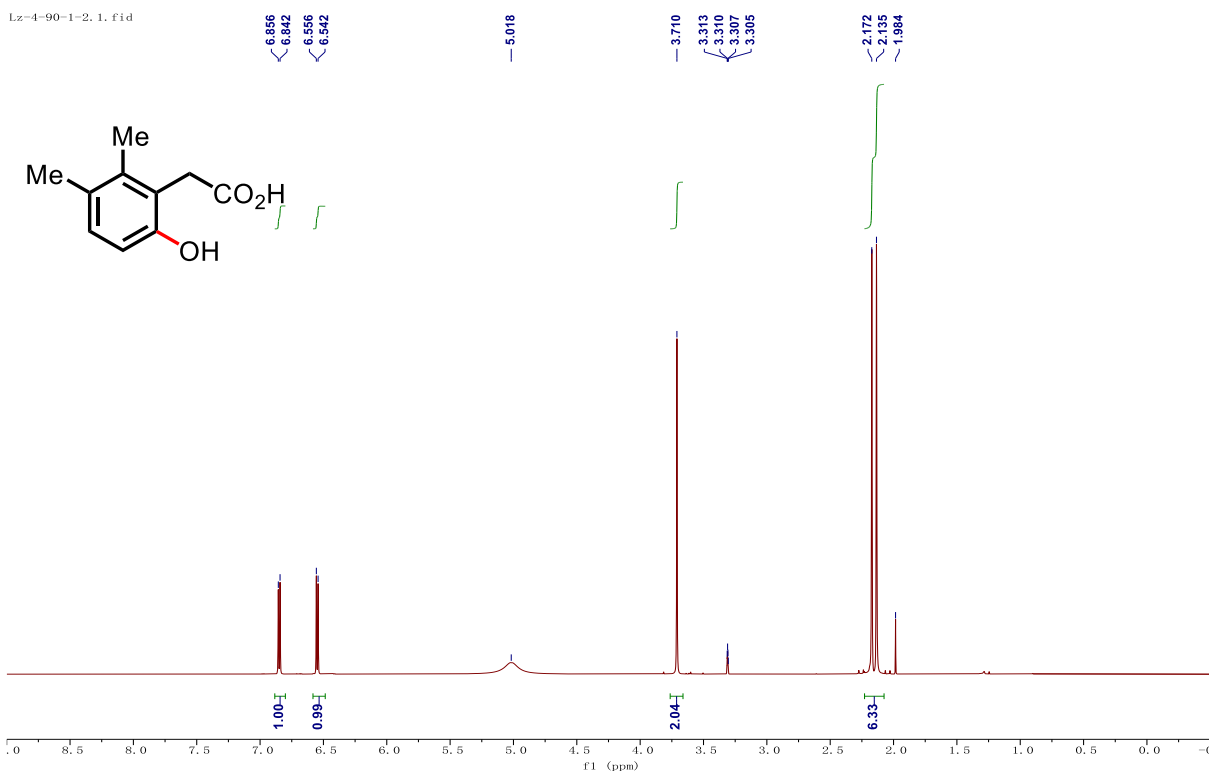

Lz-4-90-1-2.2.fid

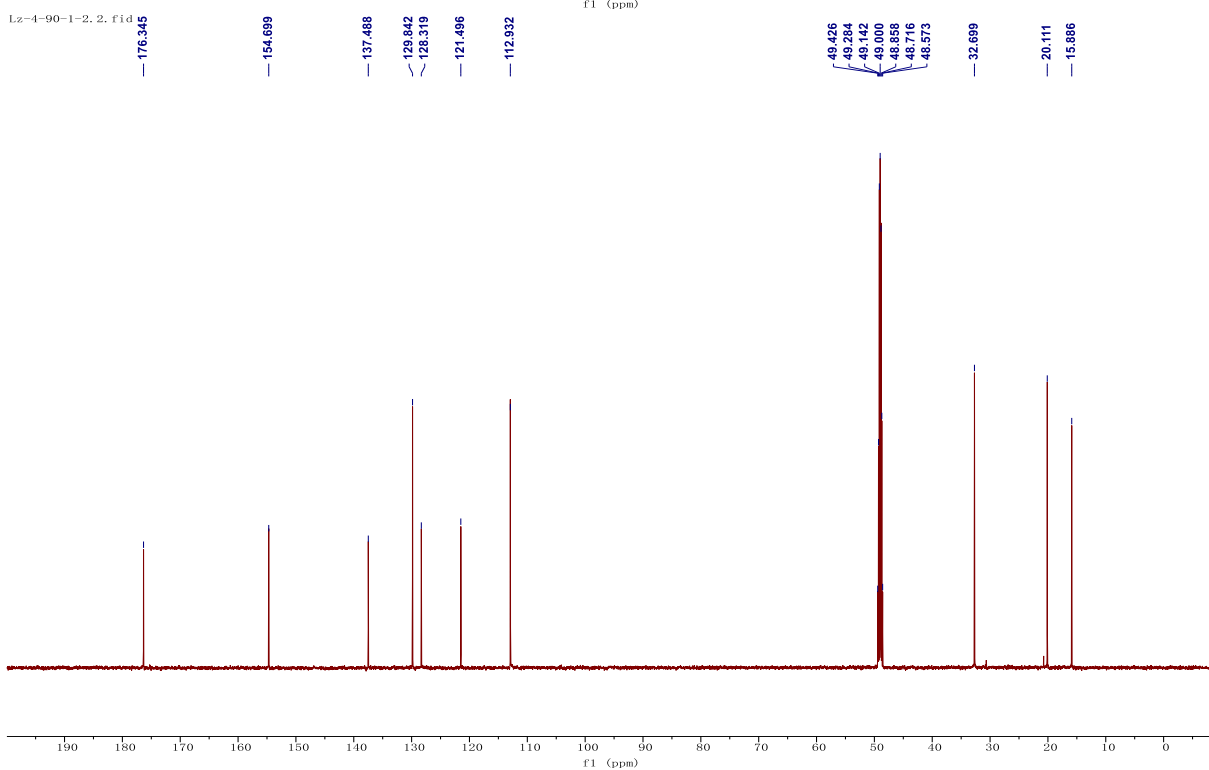

NMR Spectra of **2n**



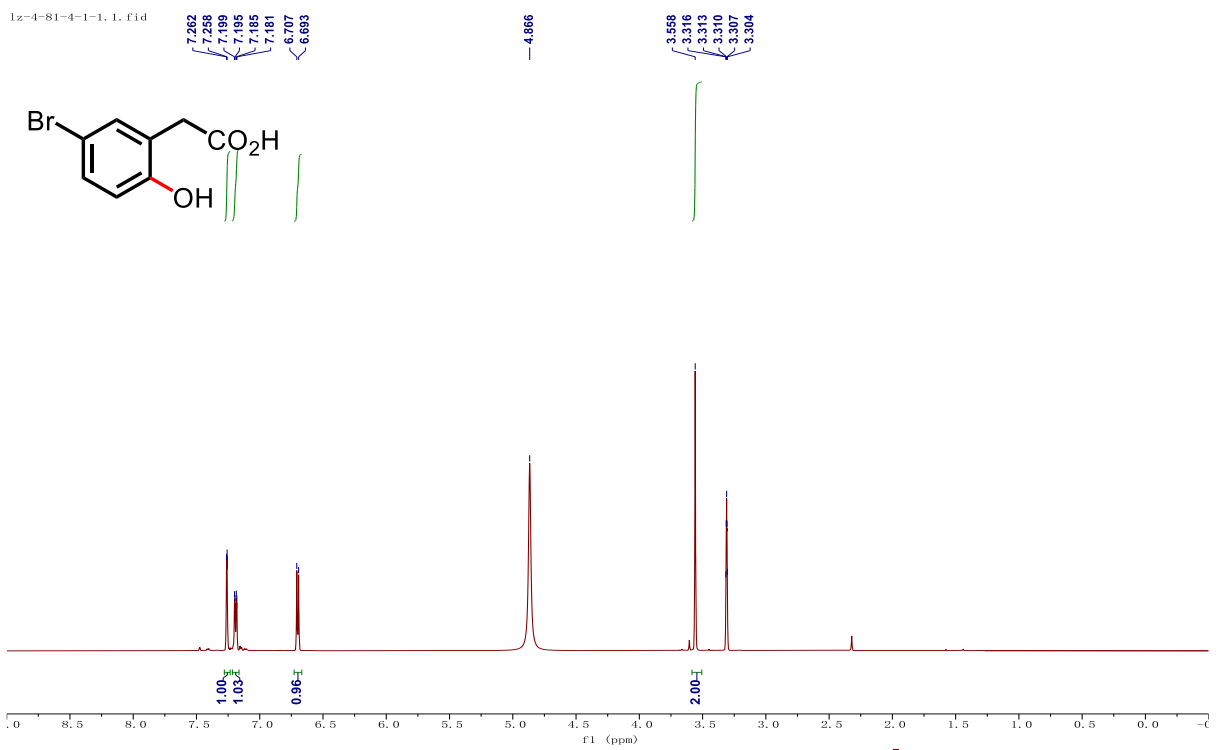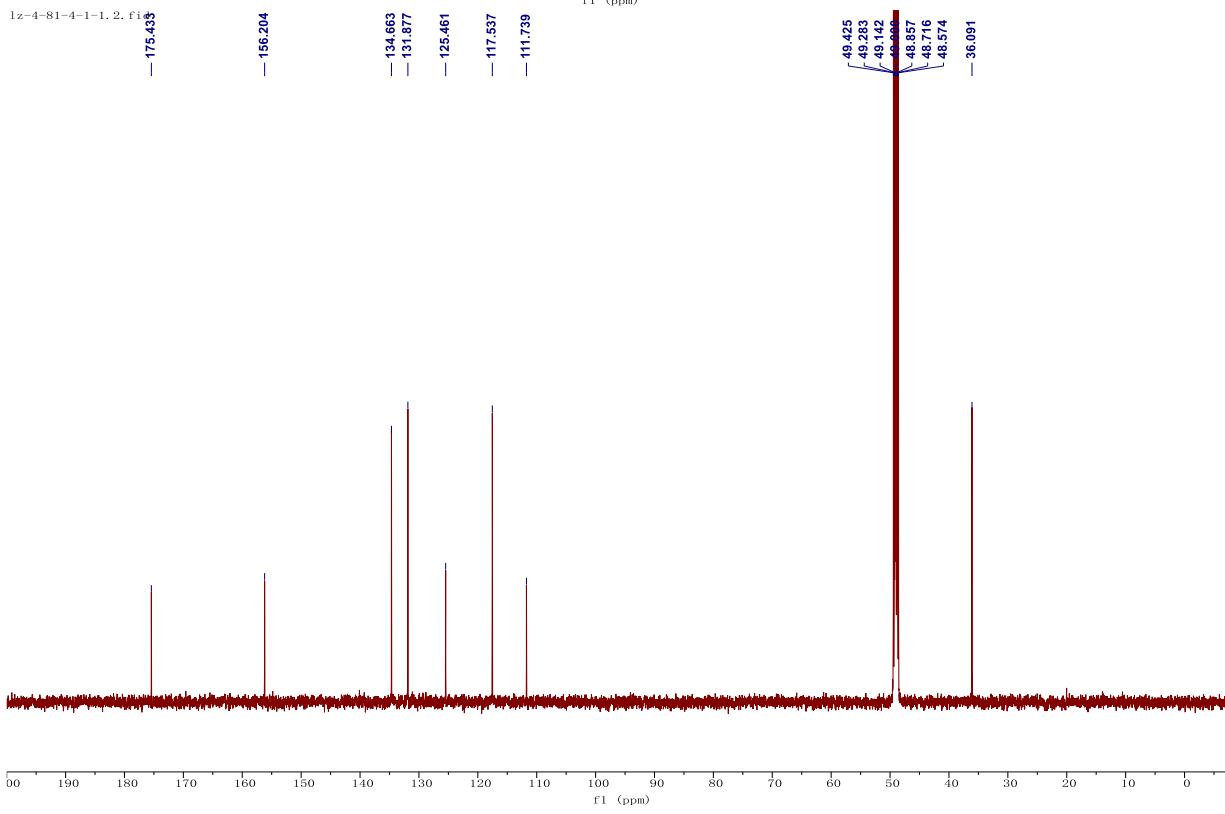

NMR Spectra of 20

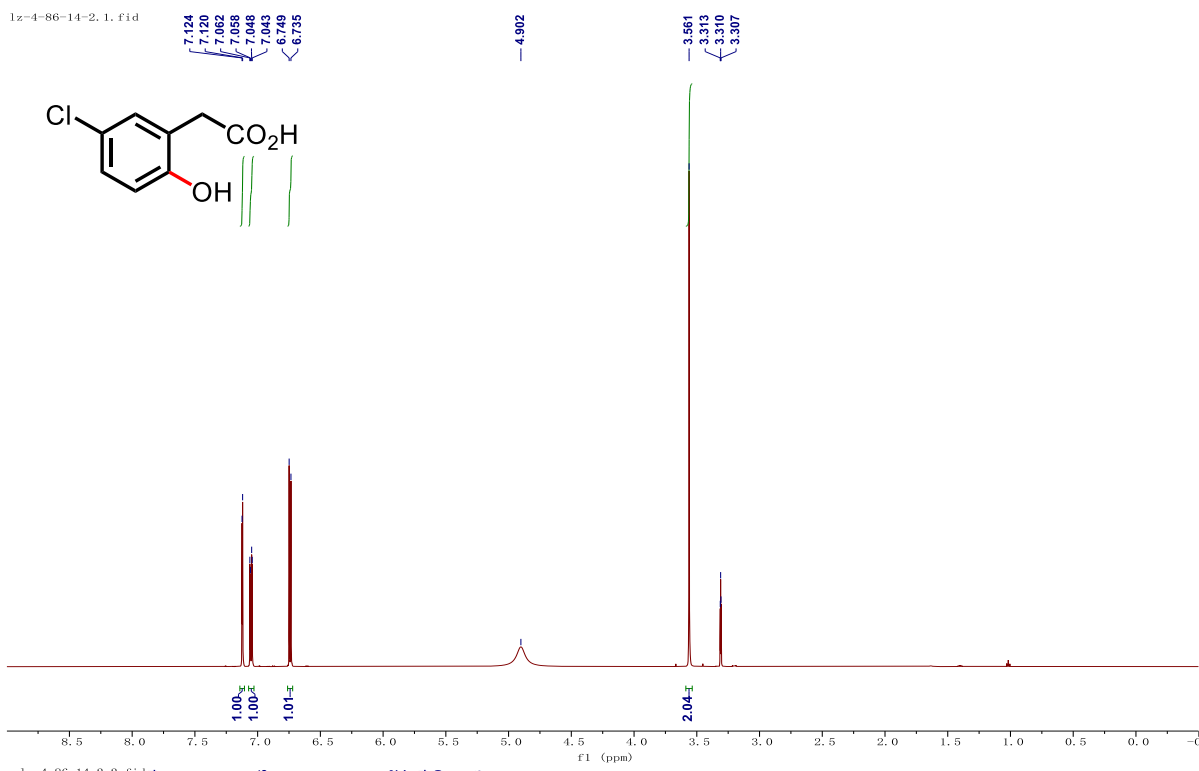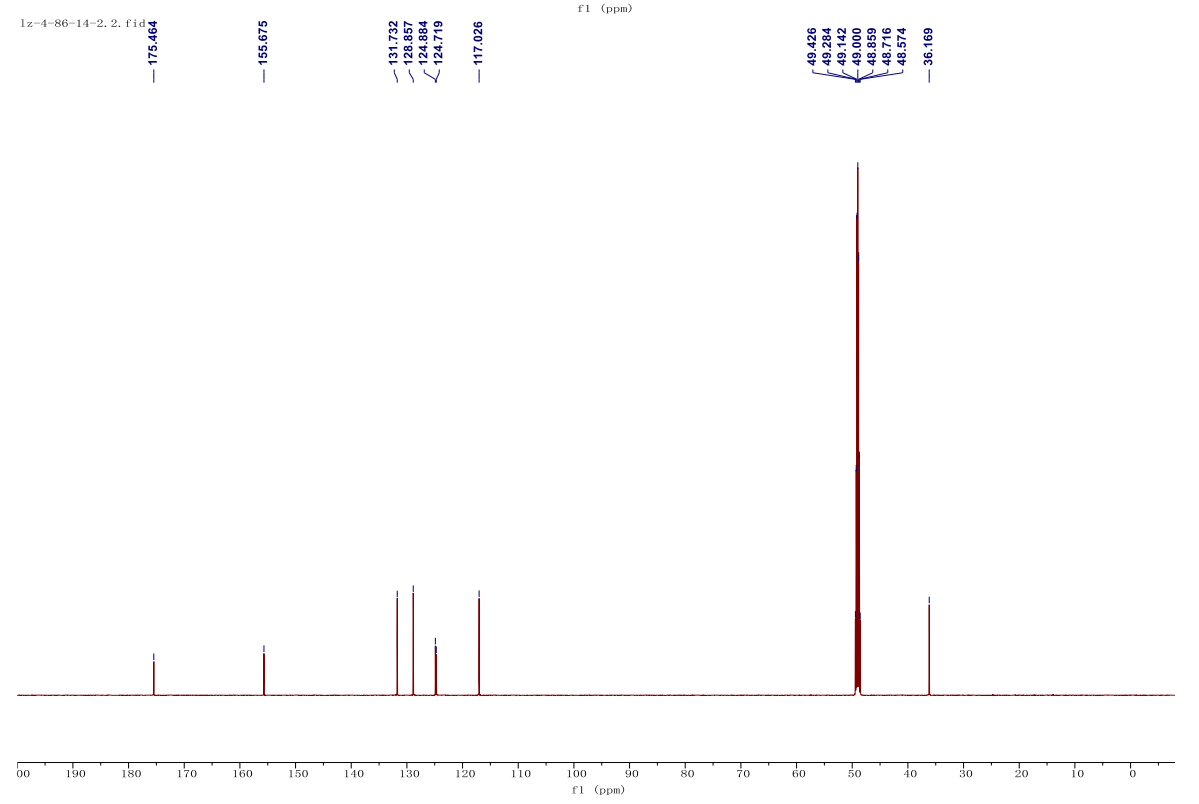

NMR Spectra of **2p**

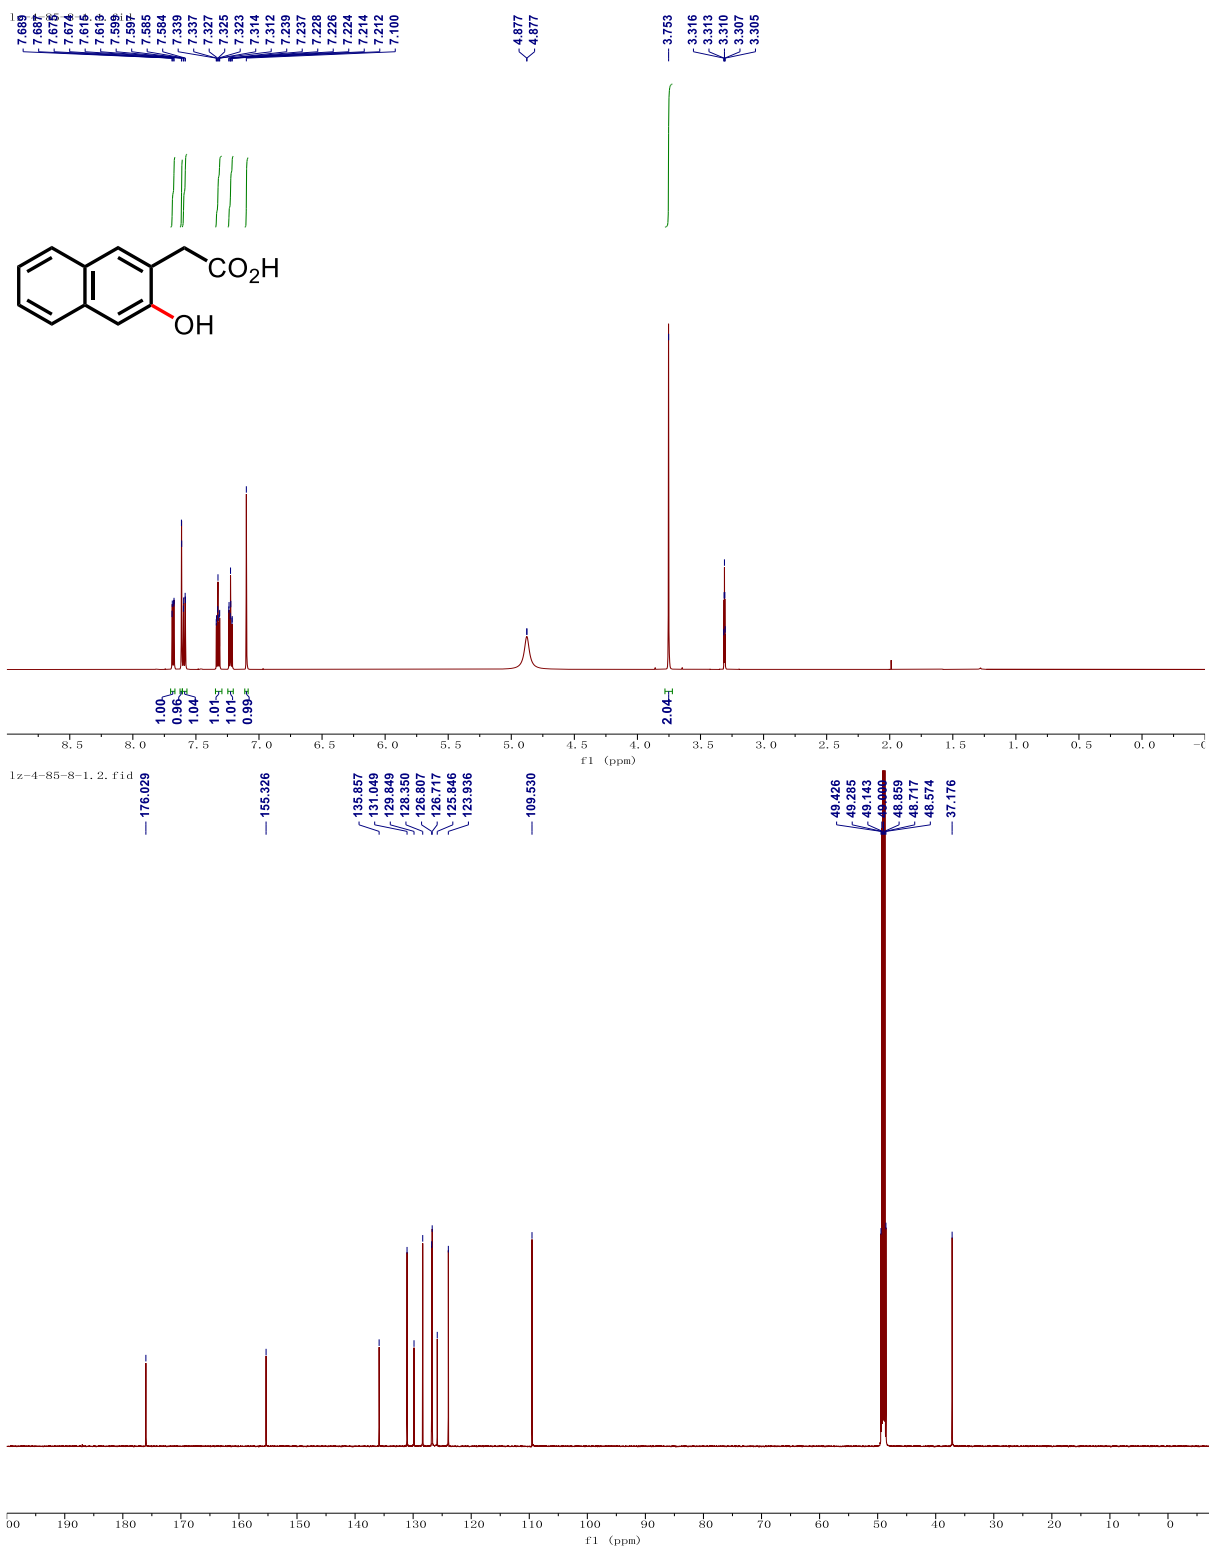

NMR Spectra of 2q

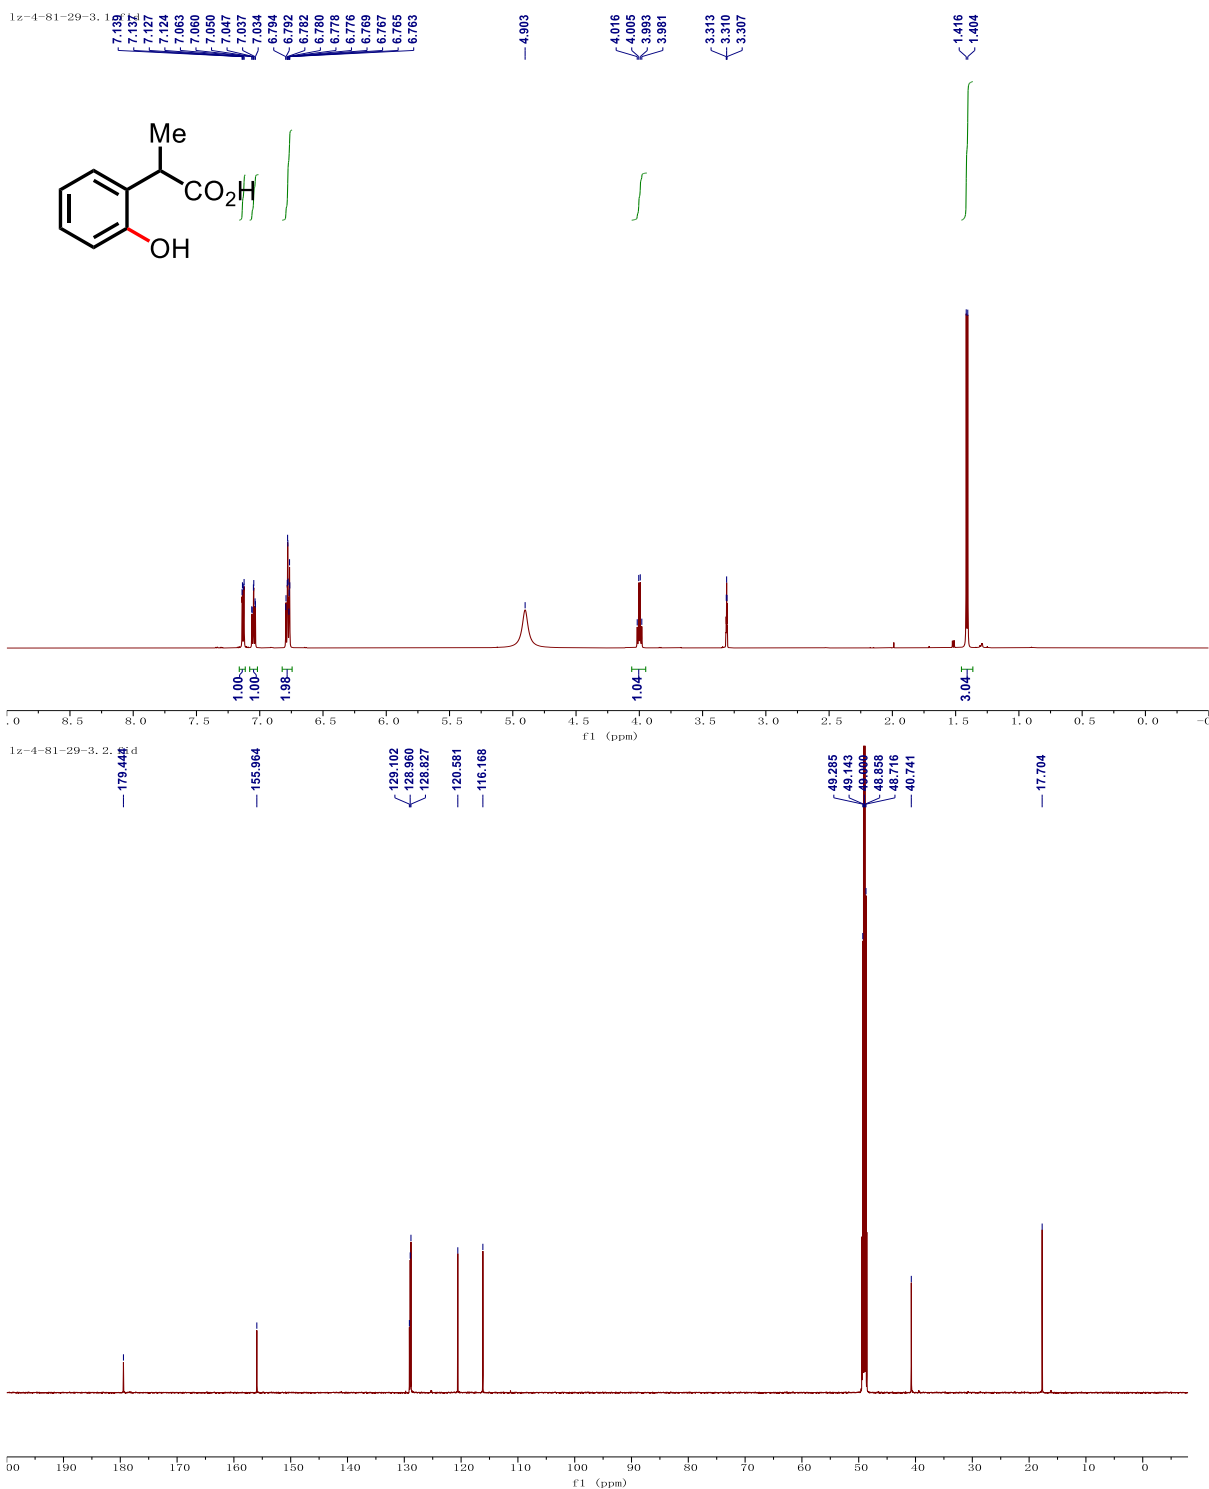

NMR Spectra of 2r

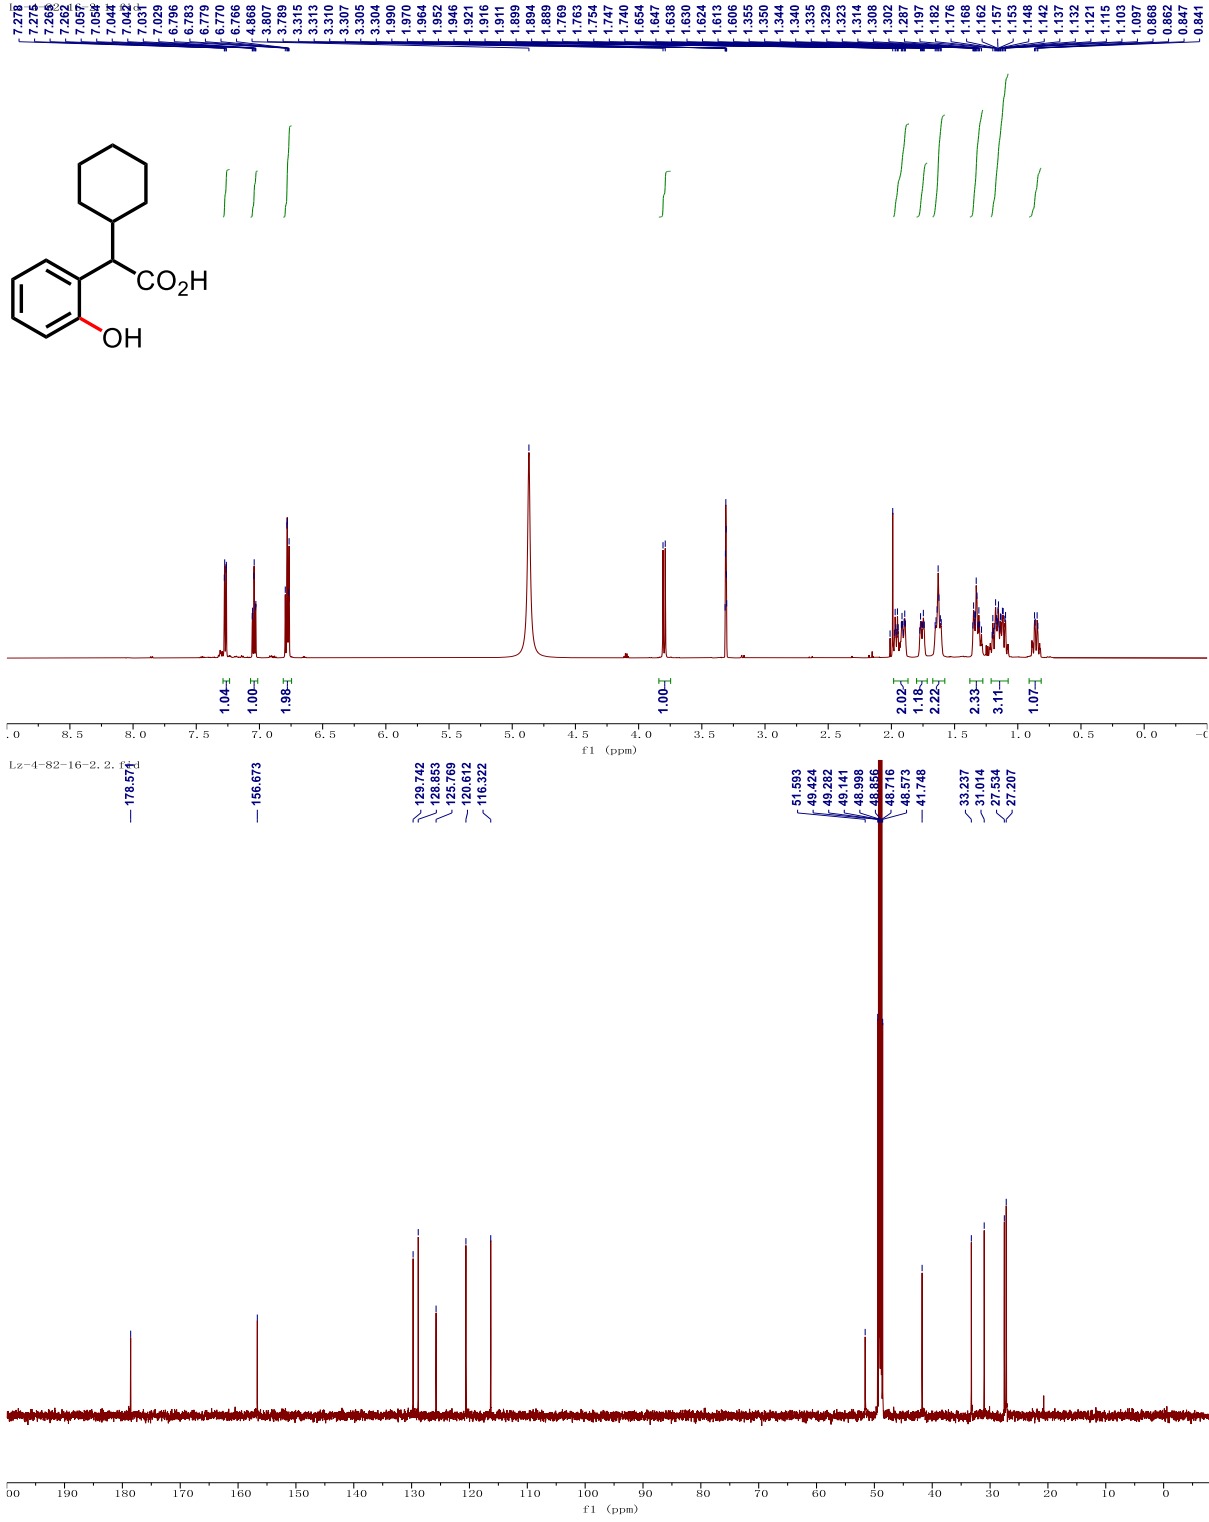

NMR Spectra of 2s

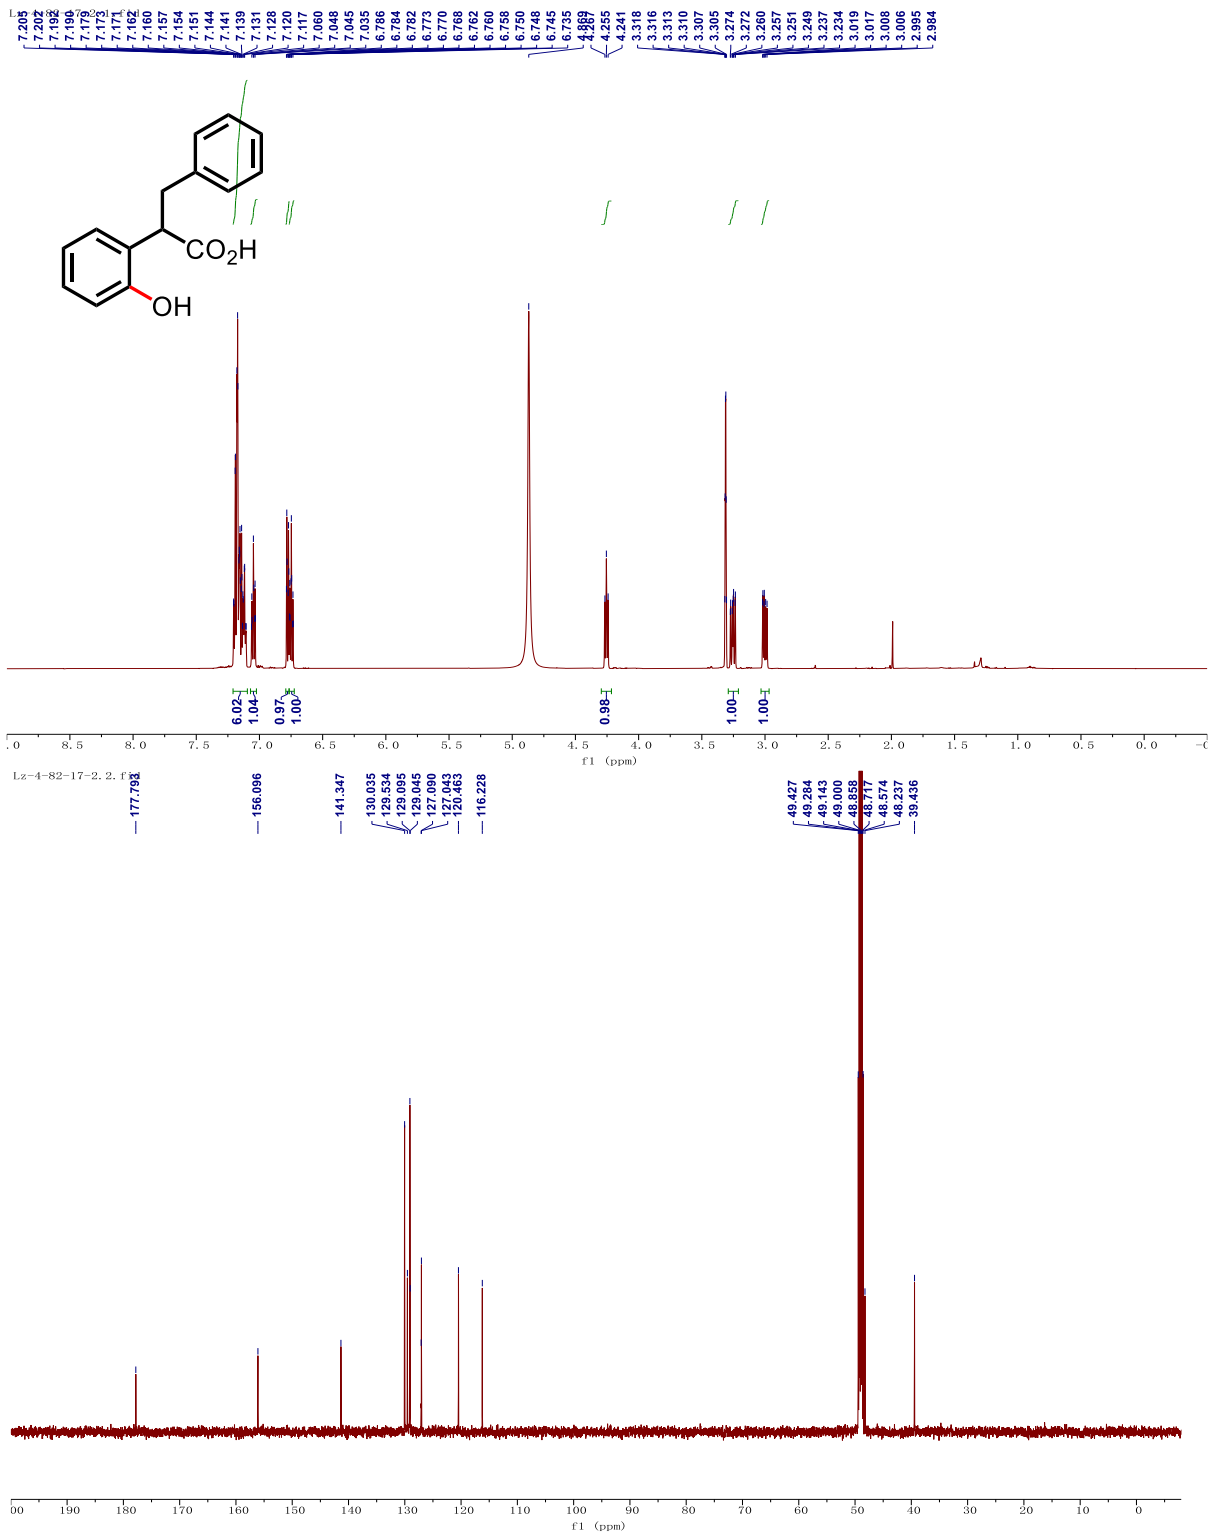

NMR Spectra of 2t

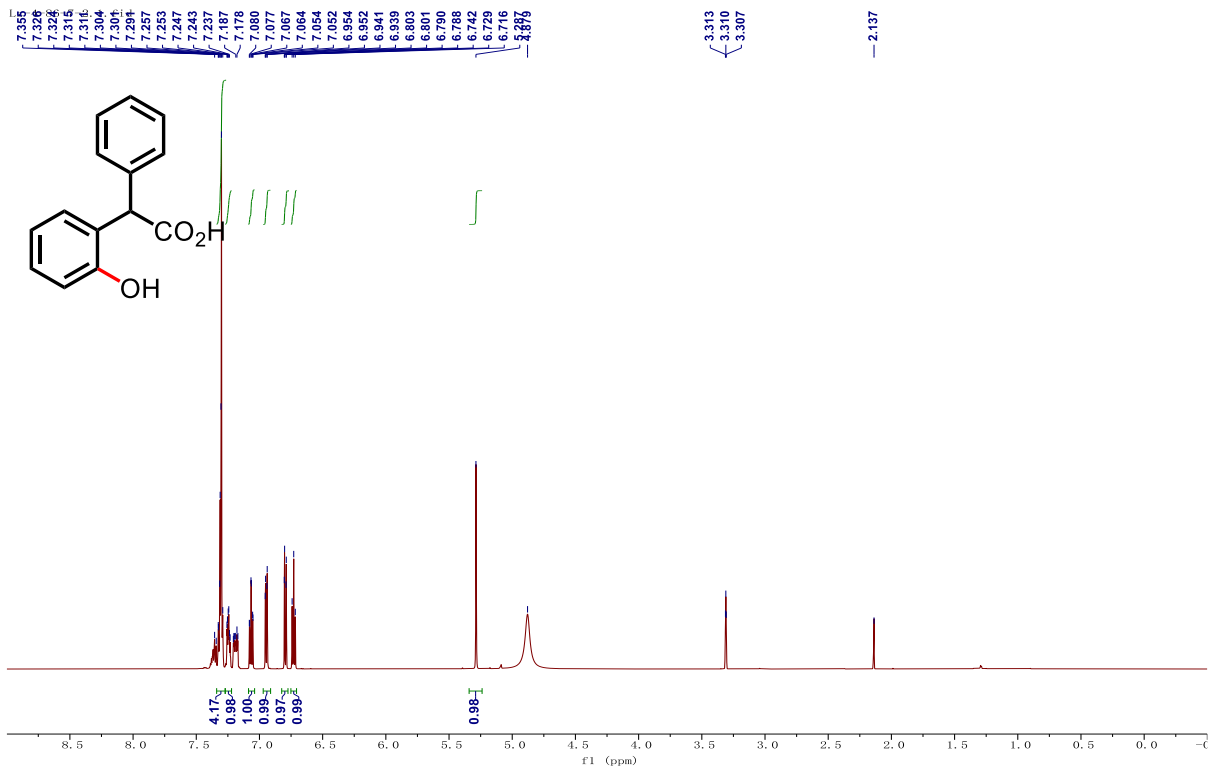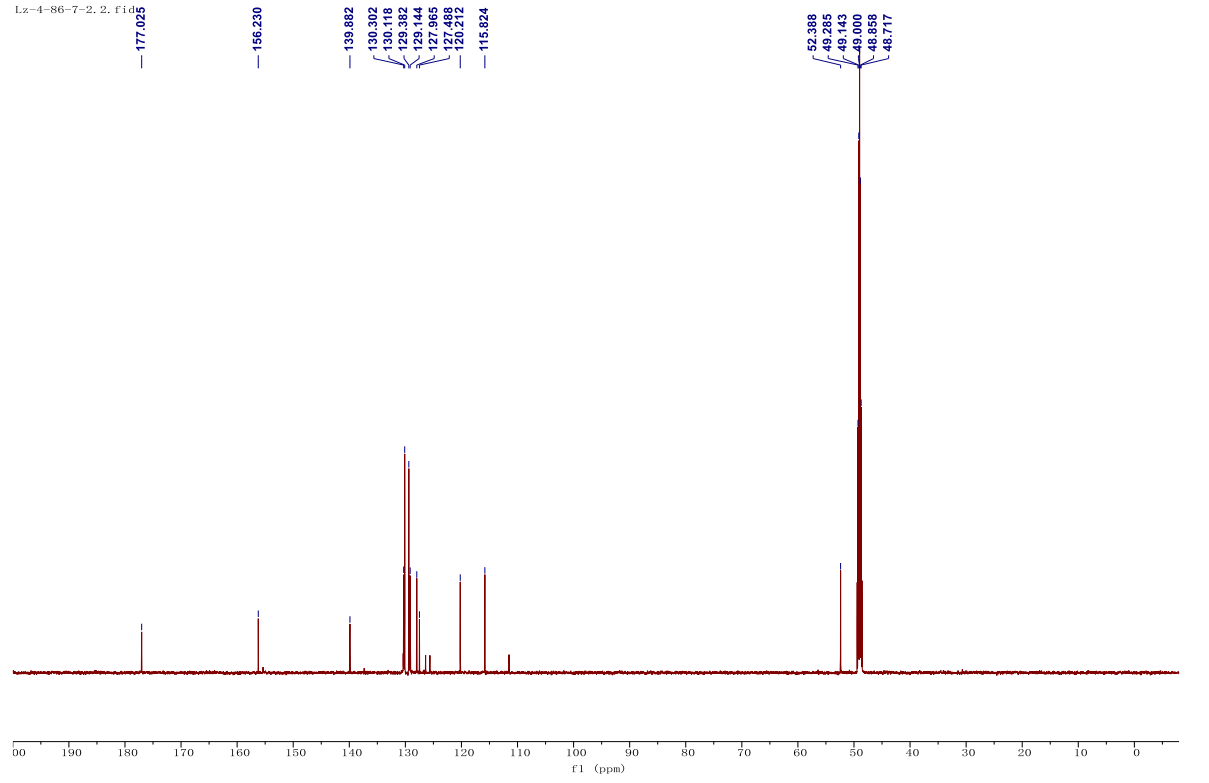

NMR Spectra of **2u**

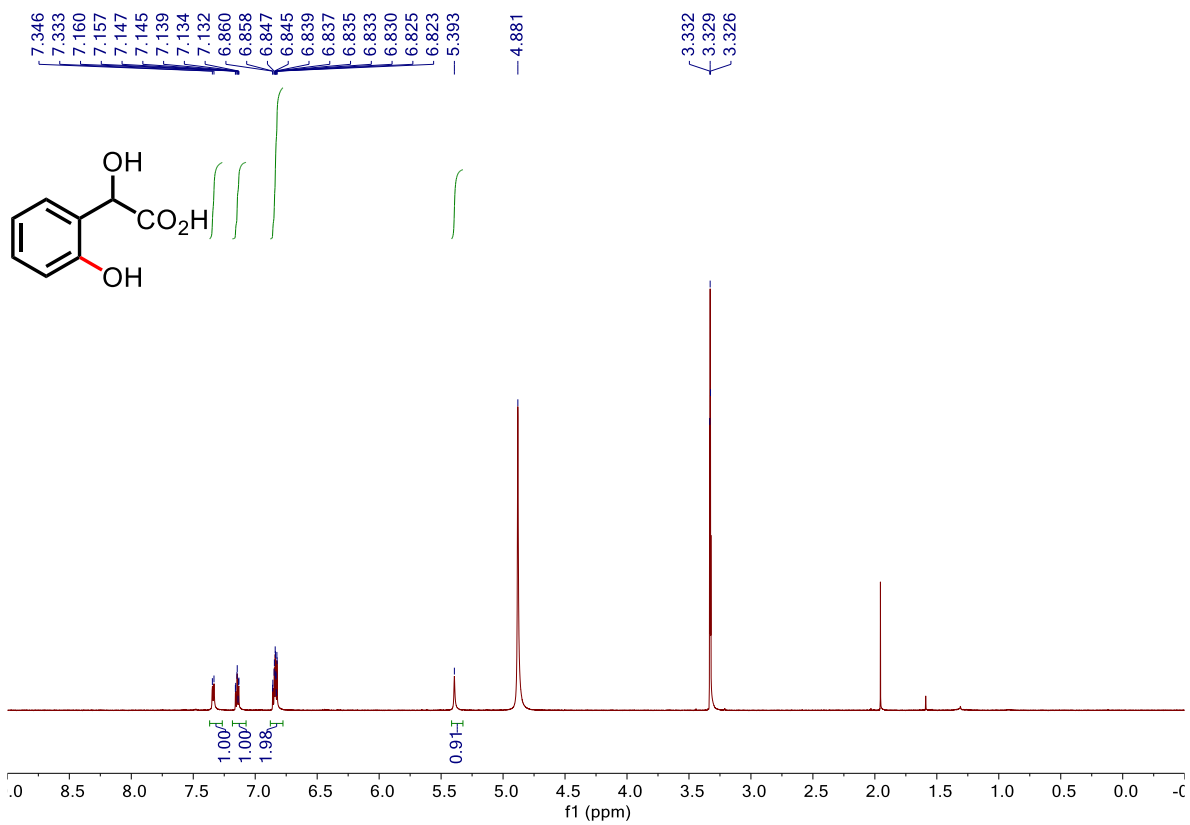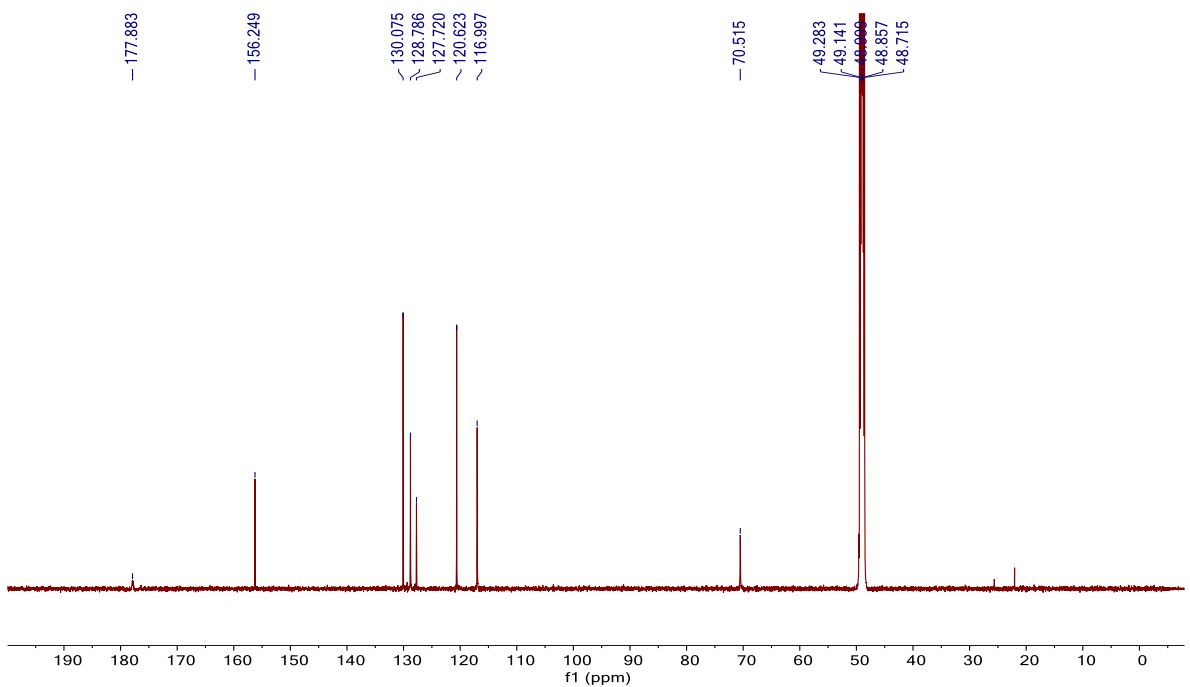

NMR Spectra of **2v**



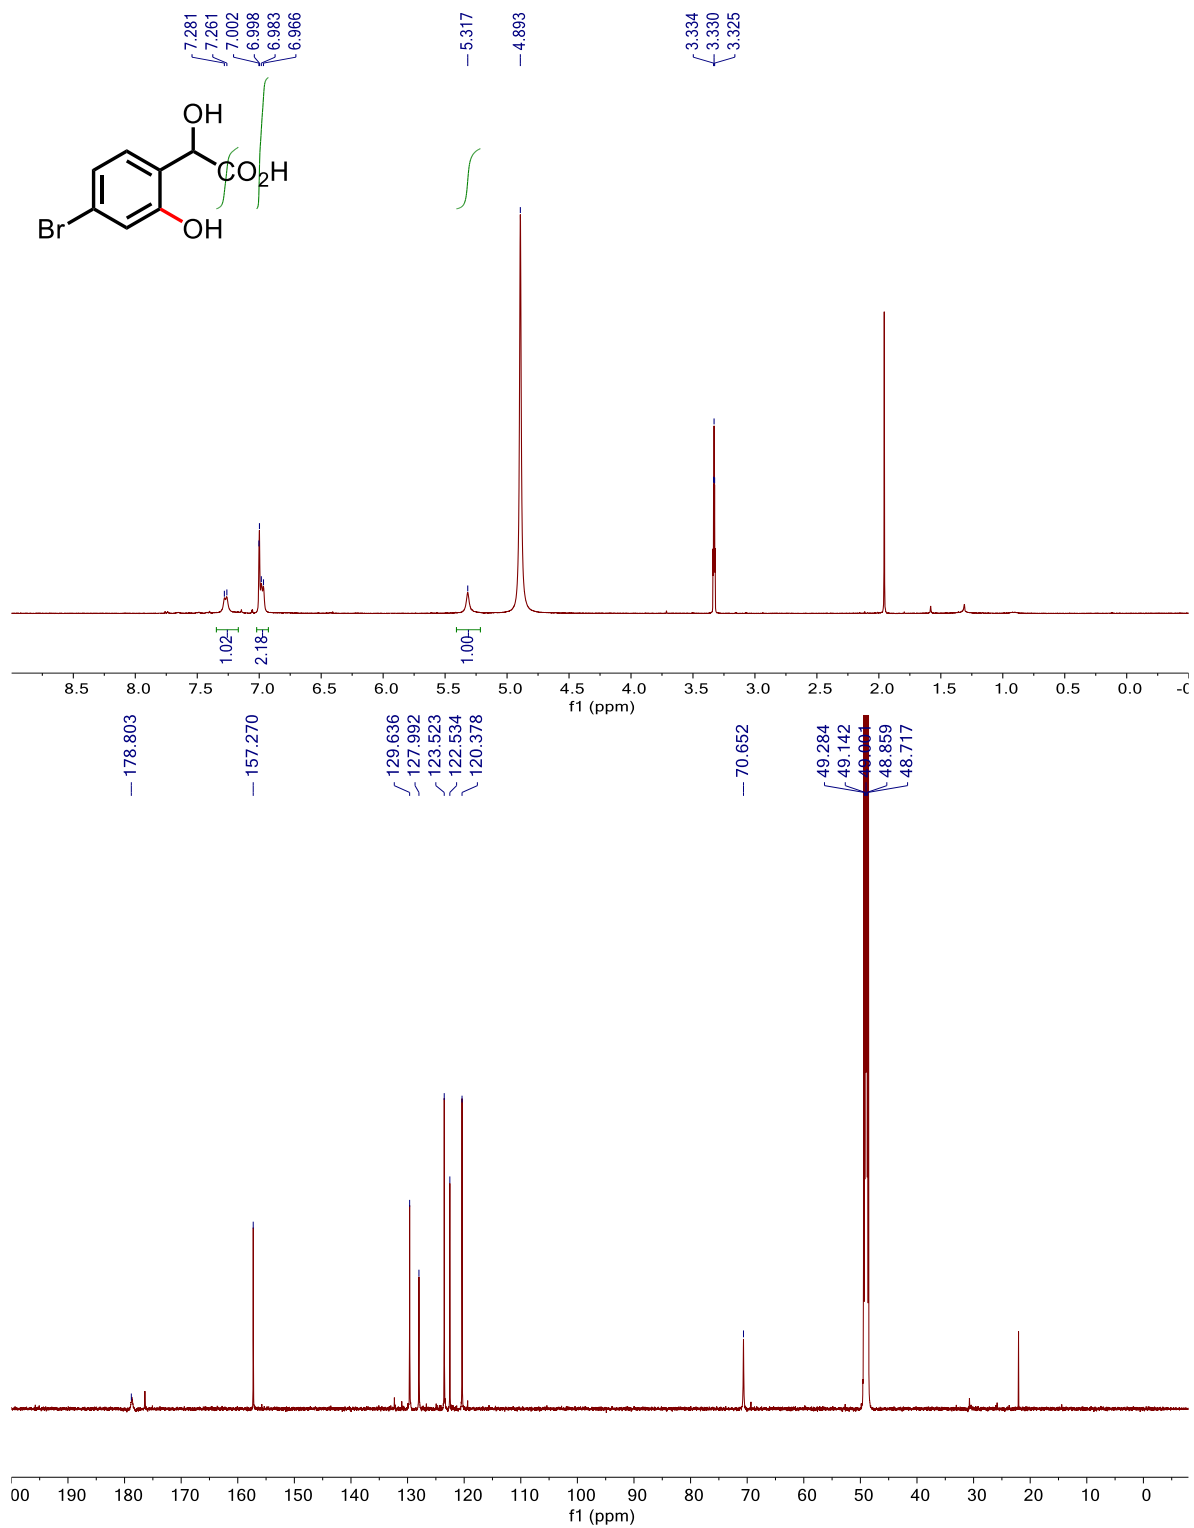

NMR Spectra of **2w**

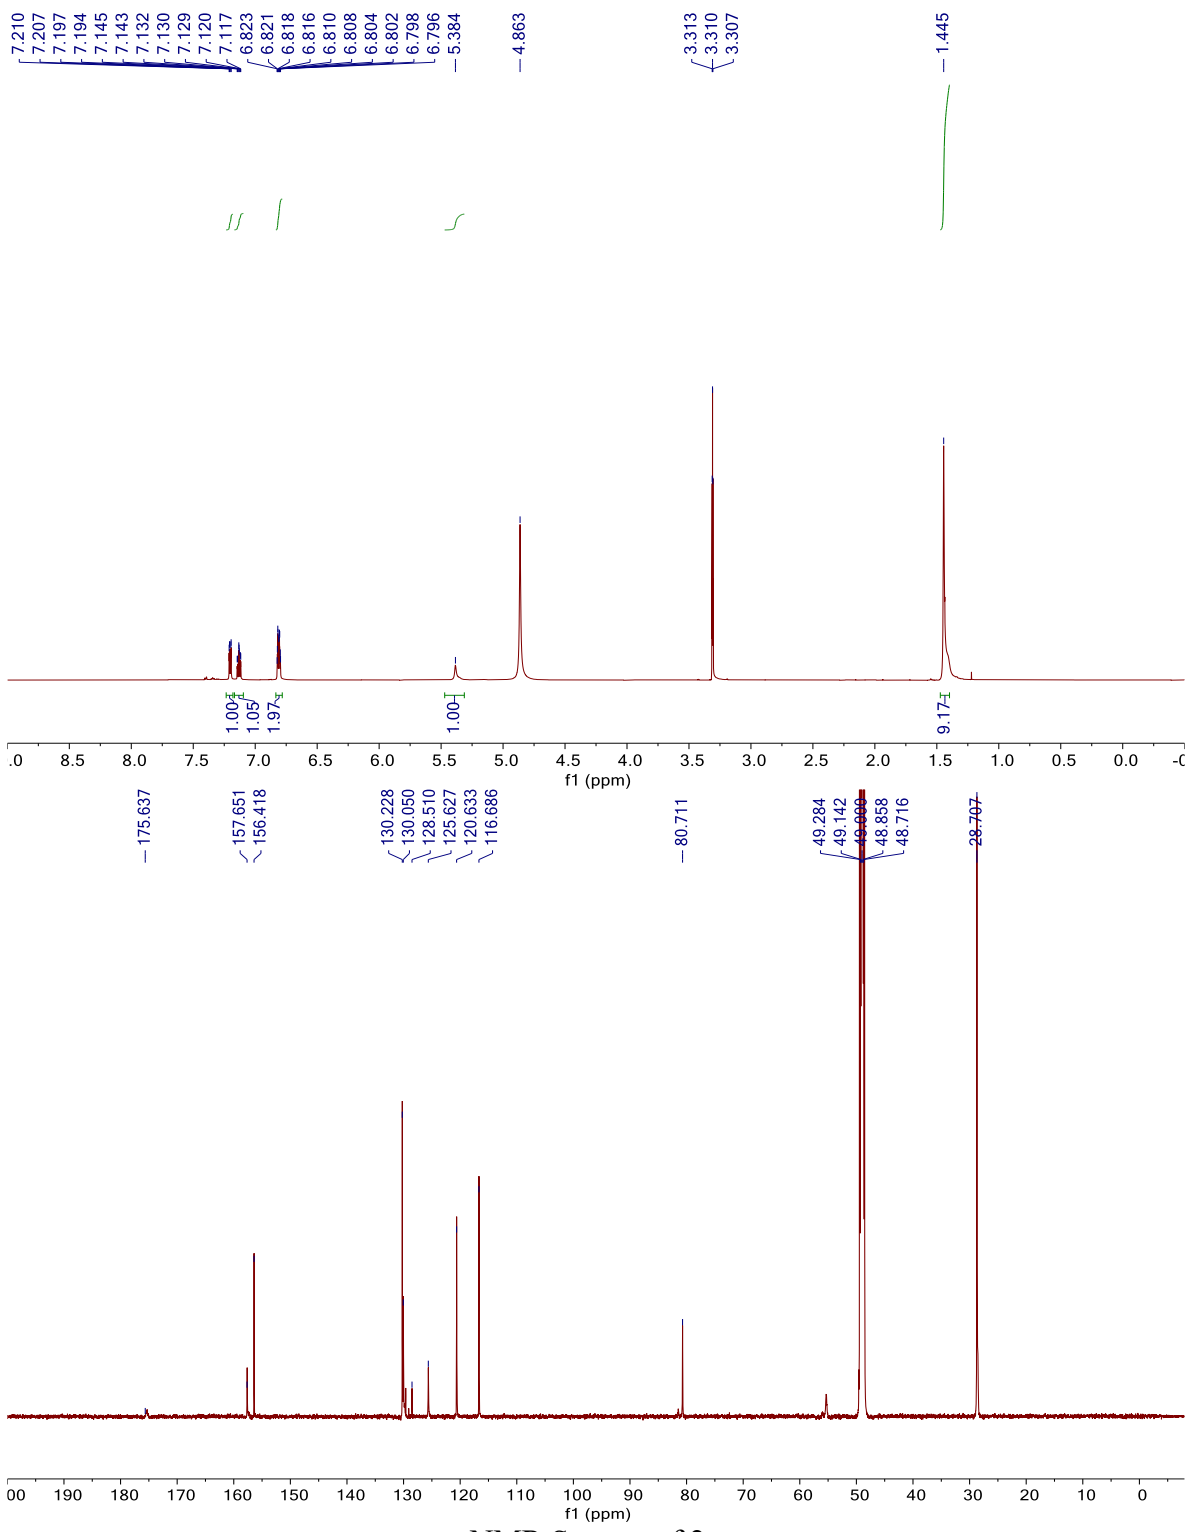

NMR Spectra of 2x



Lz-4-103-4-1.1.fid

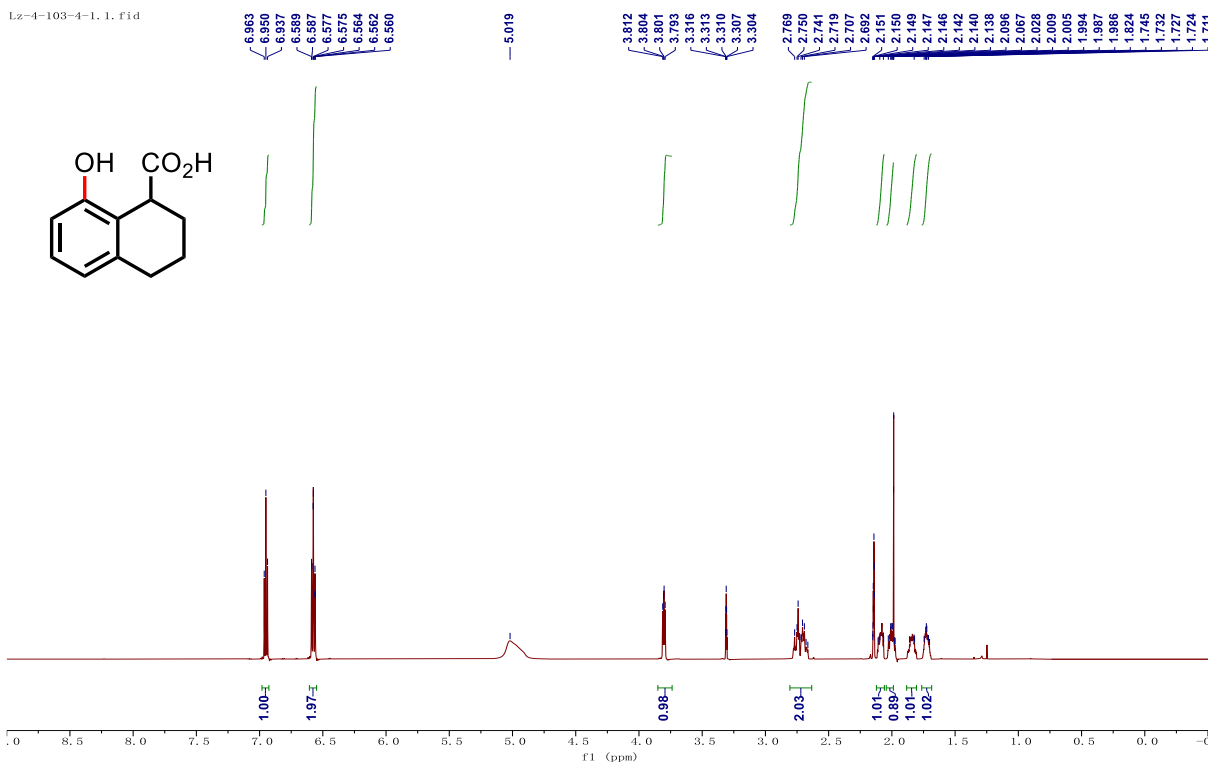

Lz-4-103-4-1.2.1r

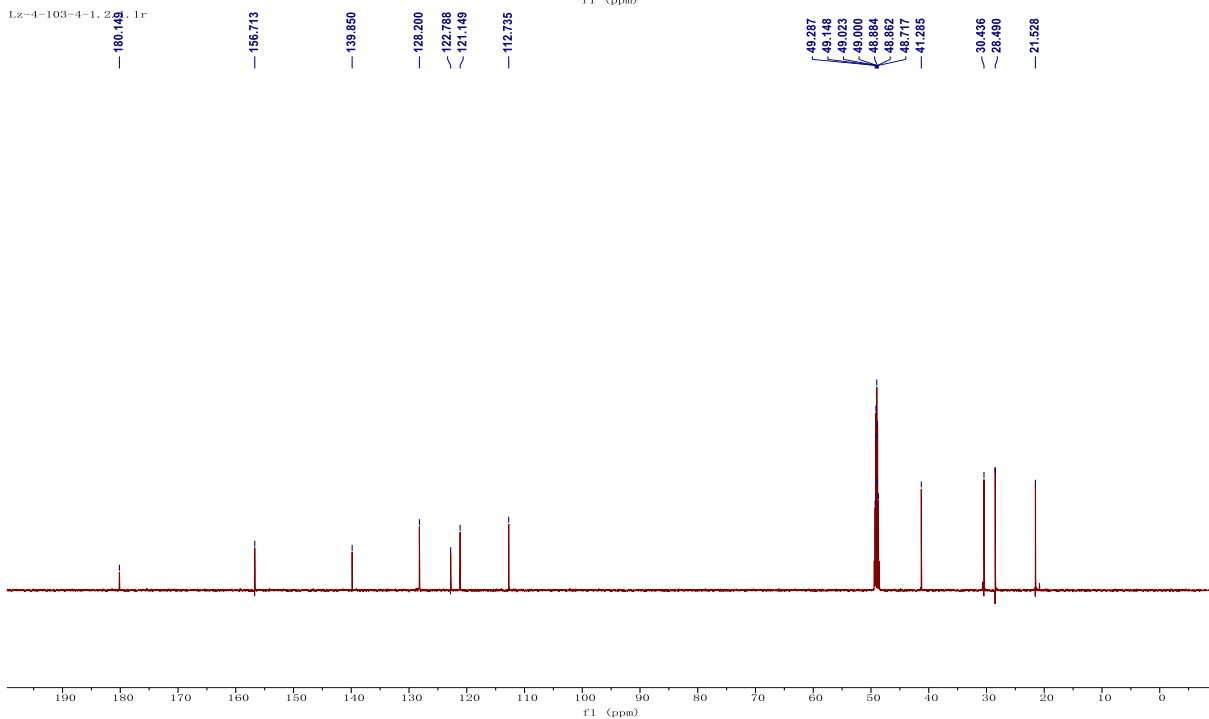

NMR Spectra of 2z

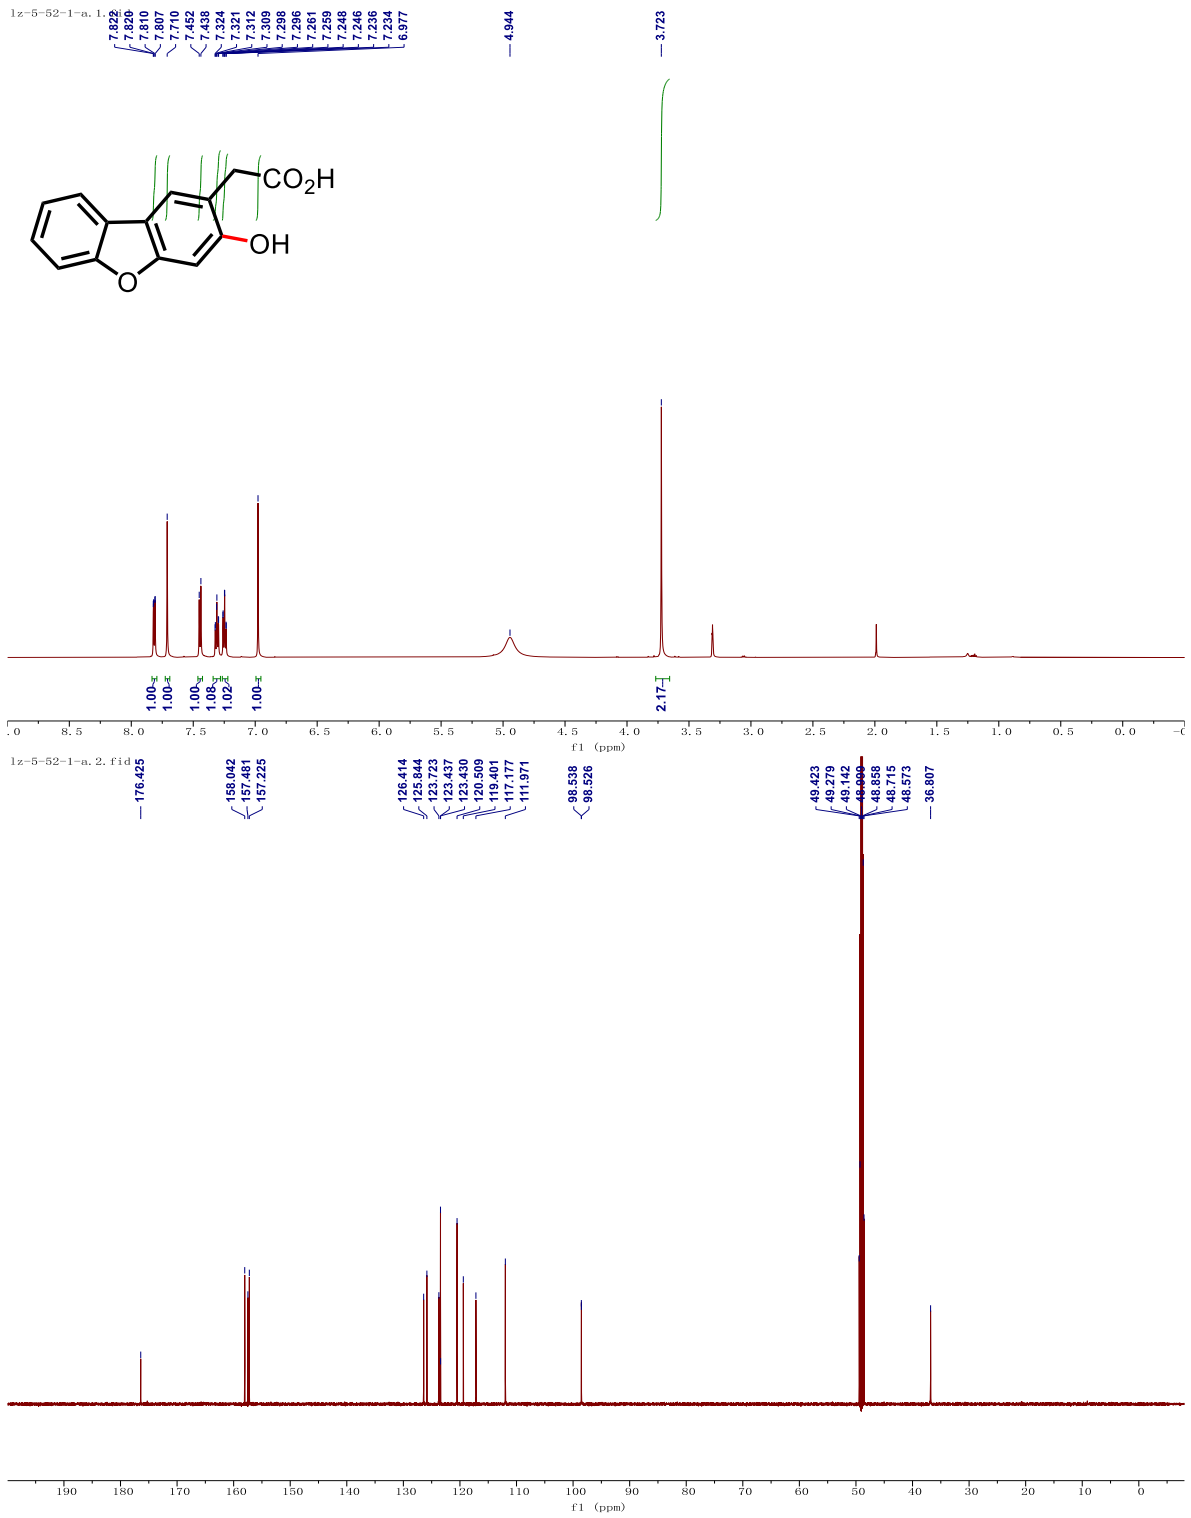

NMR Spectra of 2aa

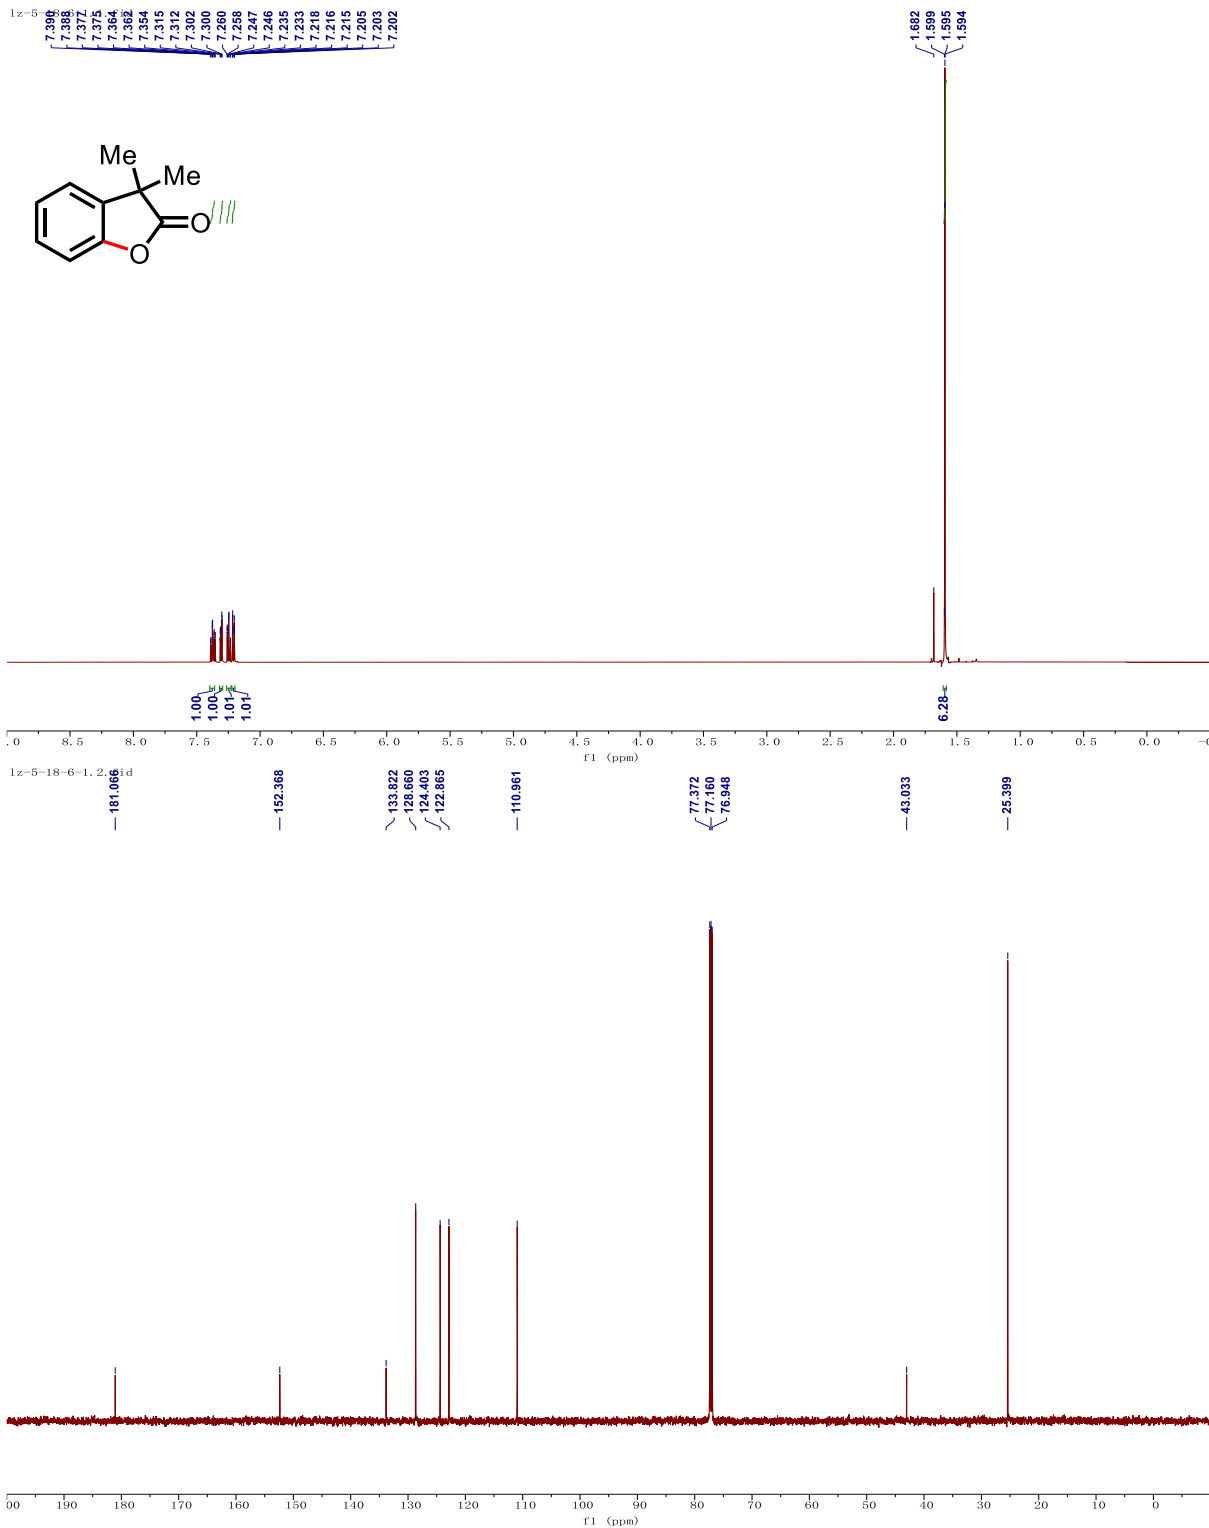

NMR Spectra of **2ab**'

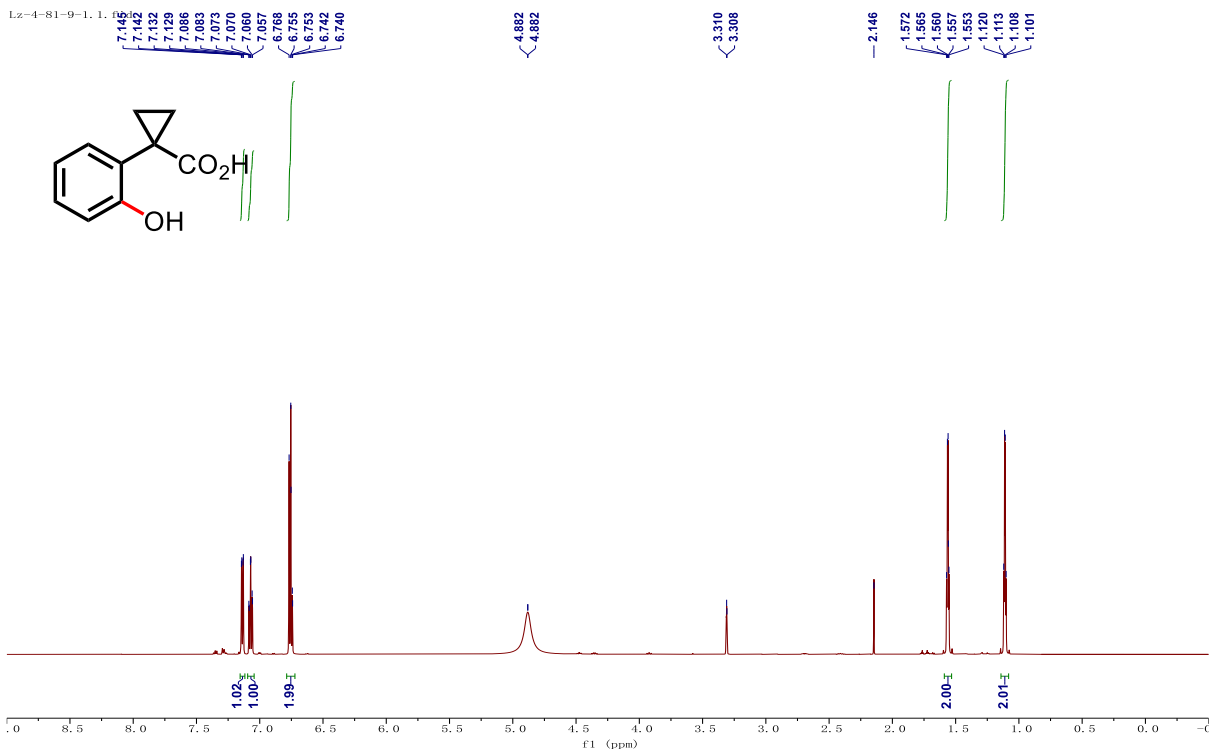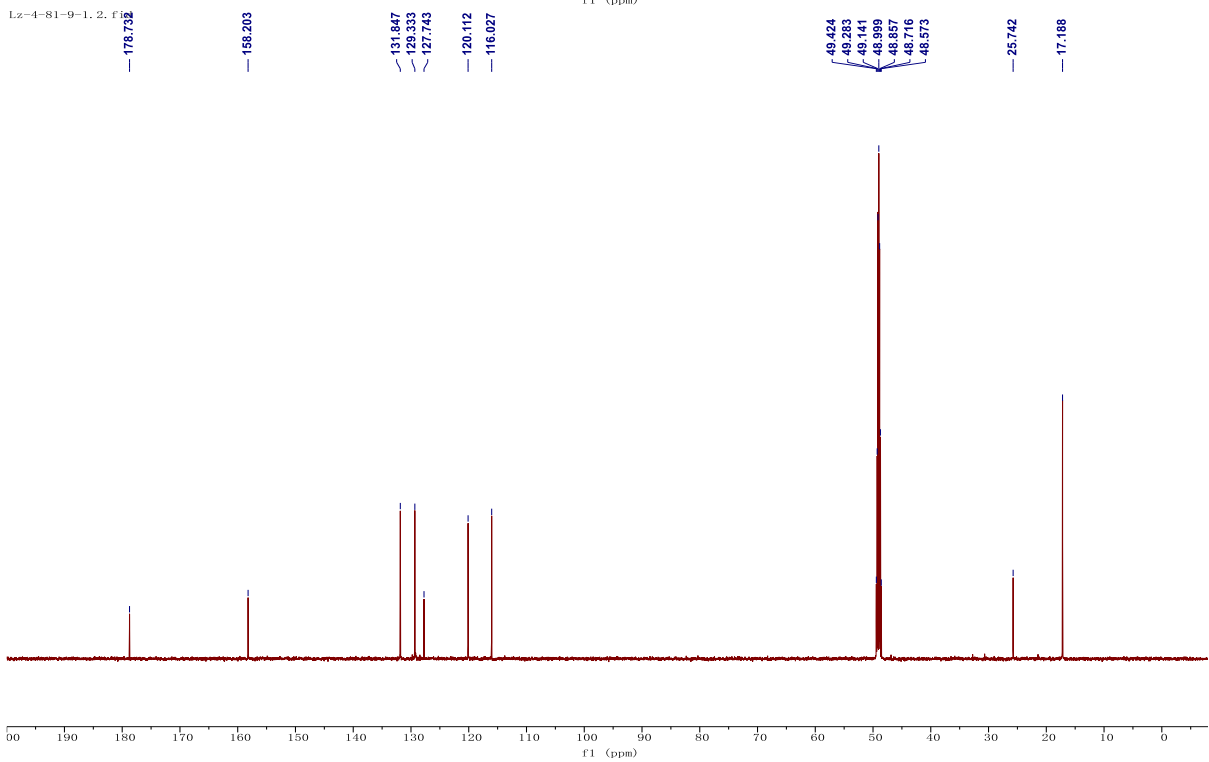

NMR Spectra of **2ac**

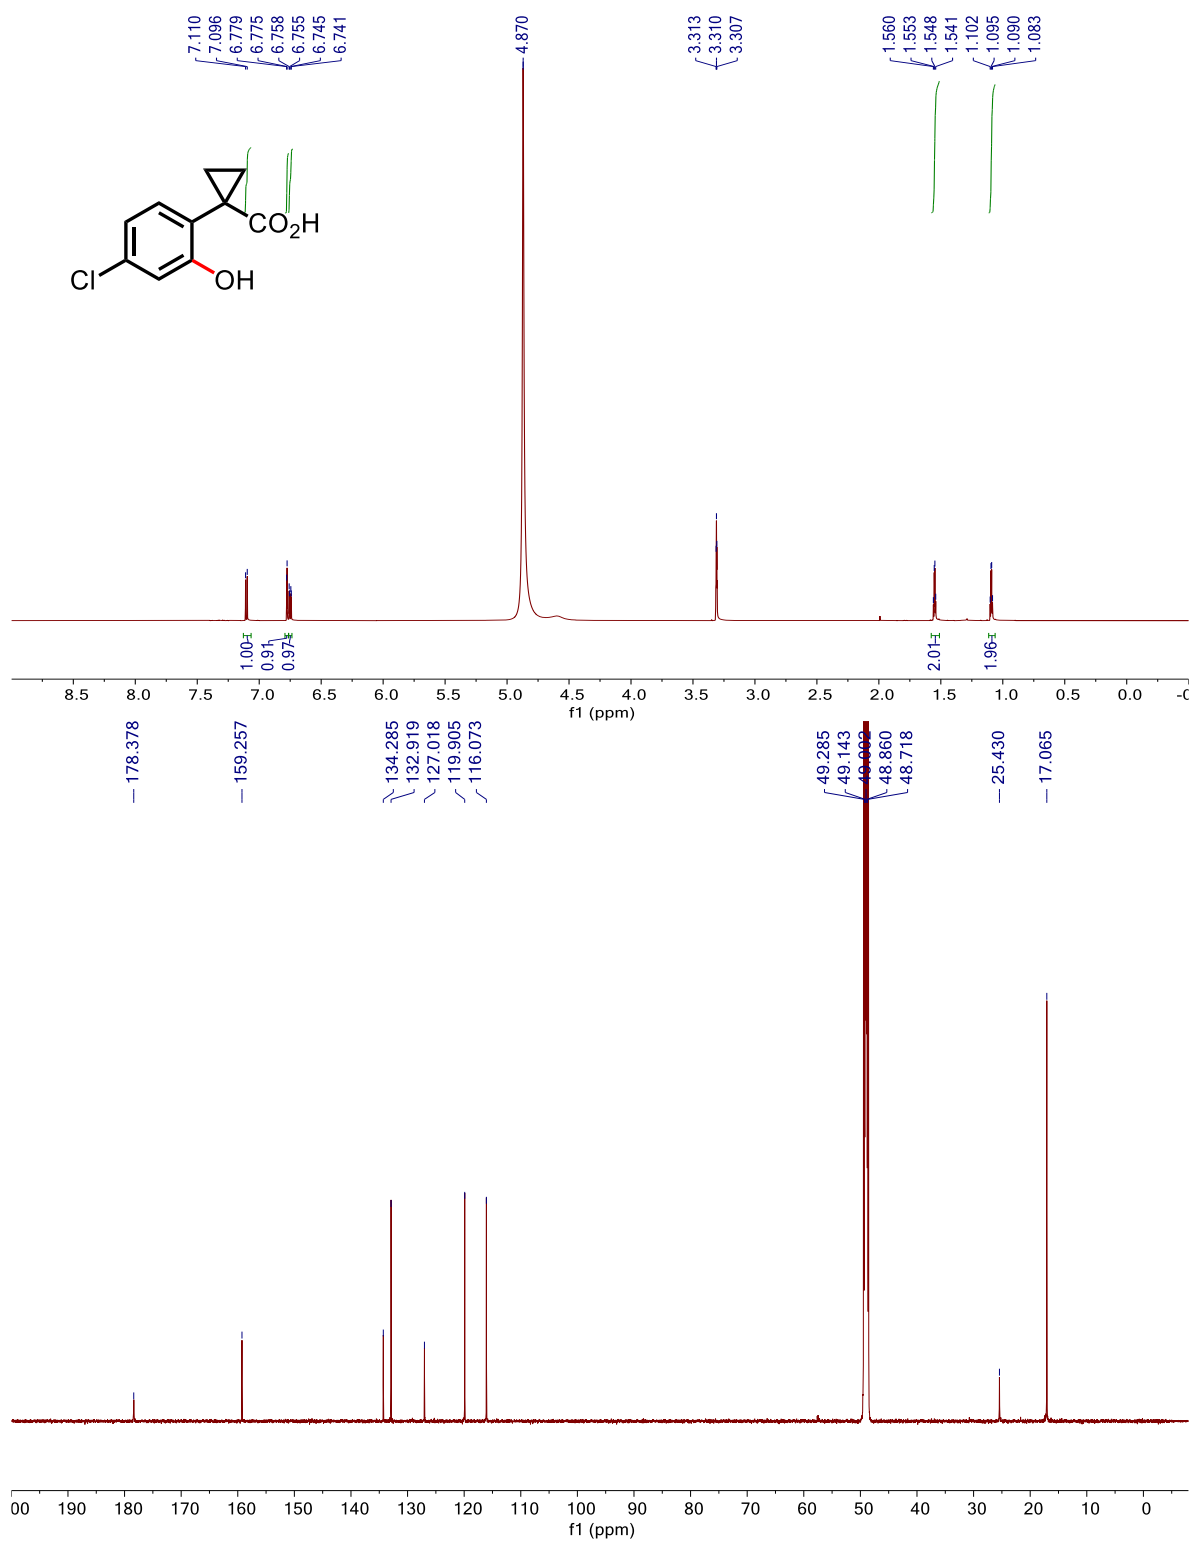

NMR Spectra of 2ad



lz-4-110-a.1.fid

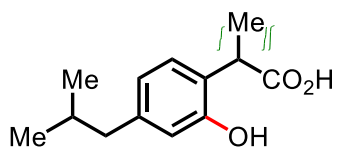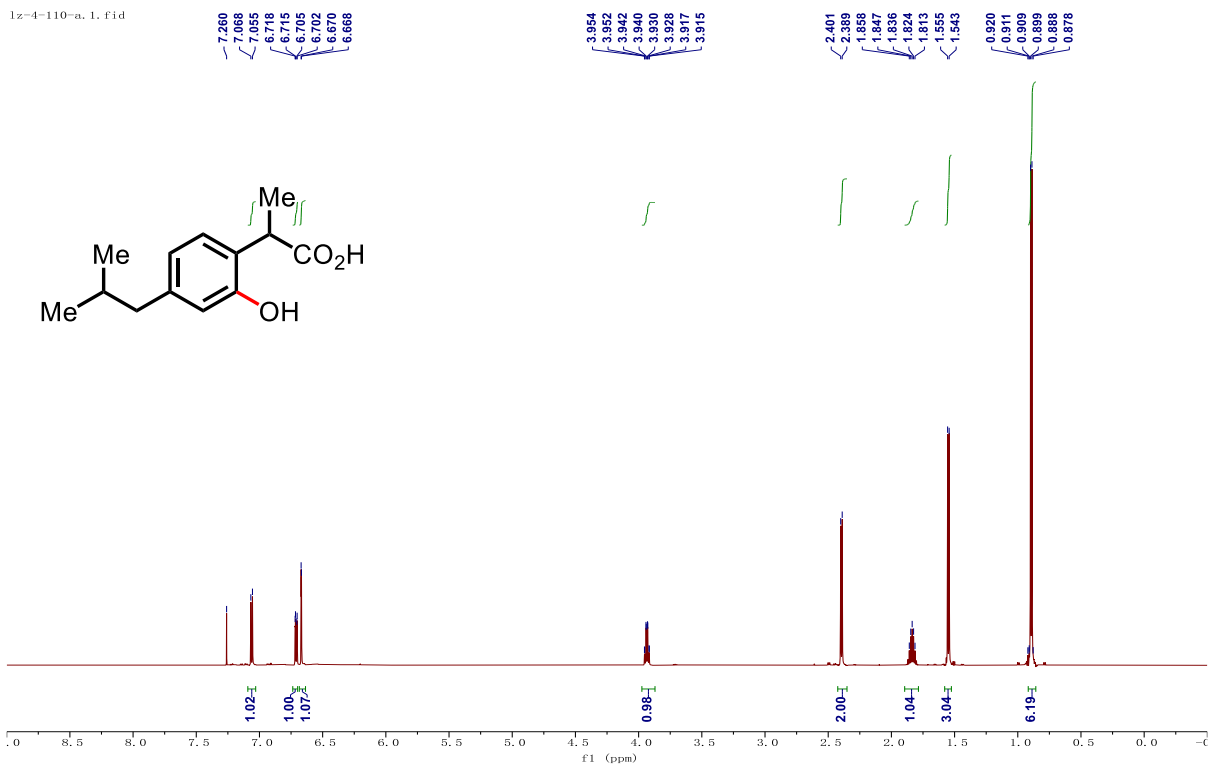

lz-4-110-a.2.2

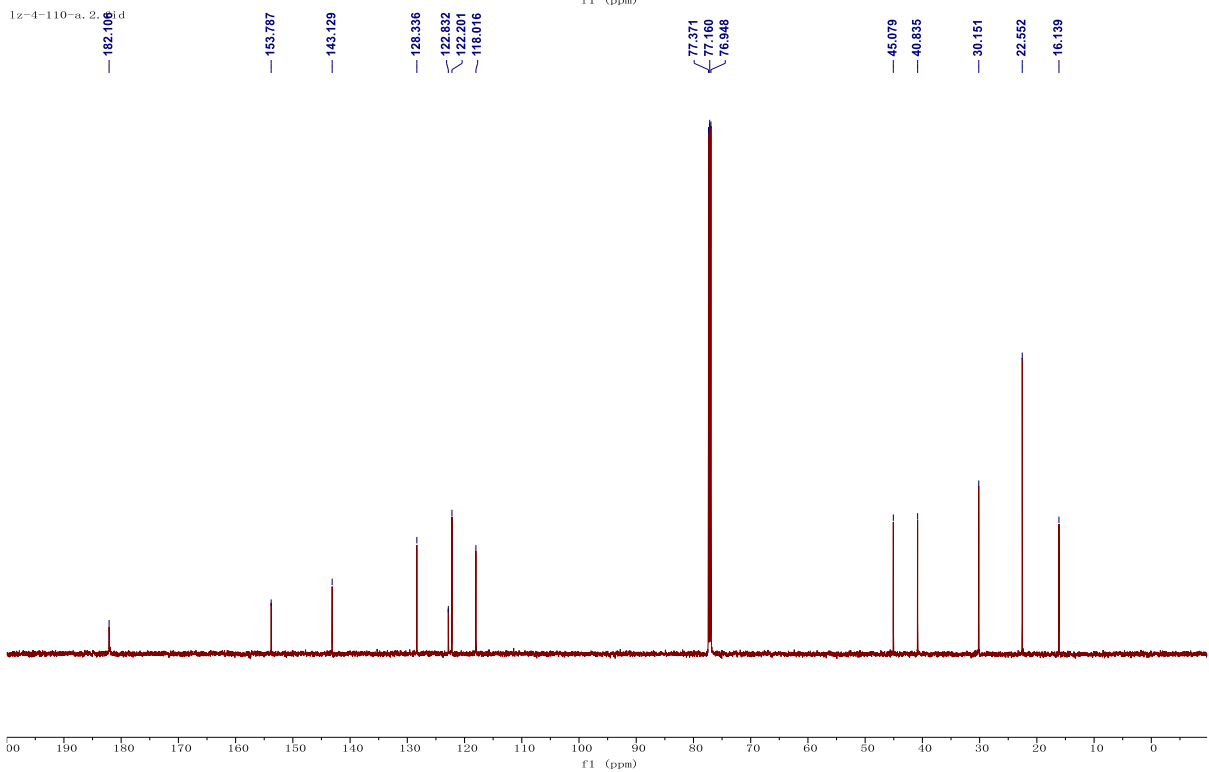

NMR Spectra of 2ae

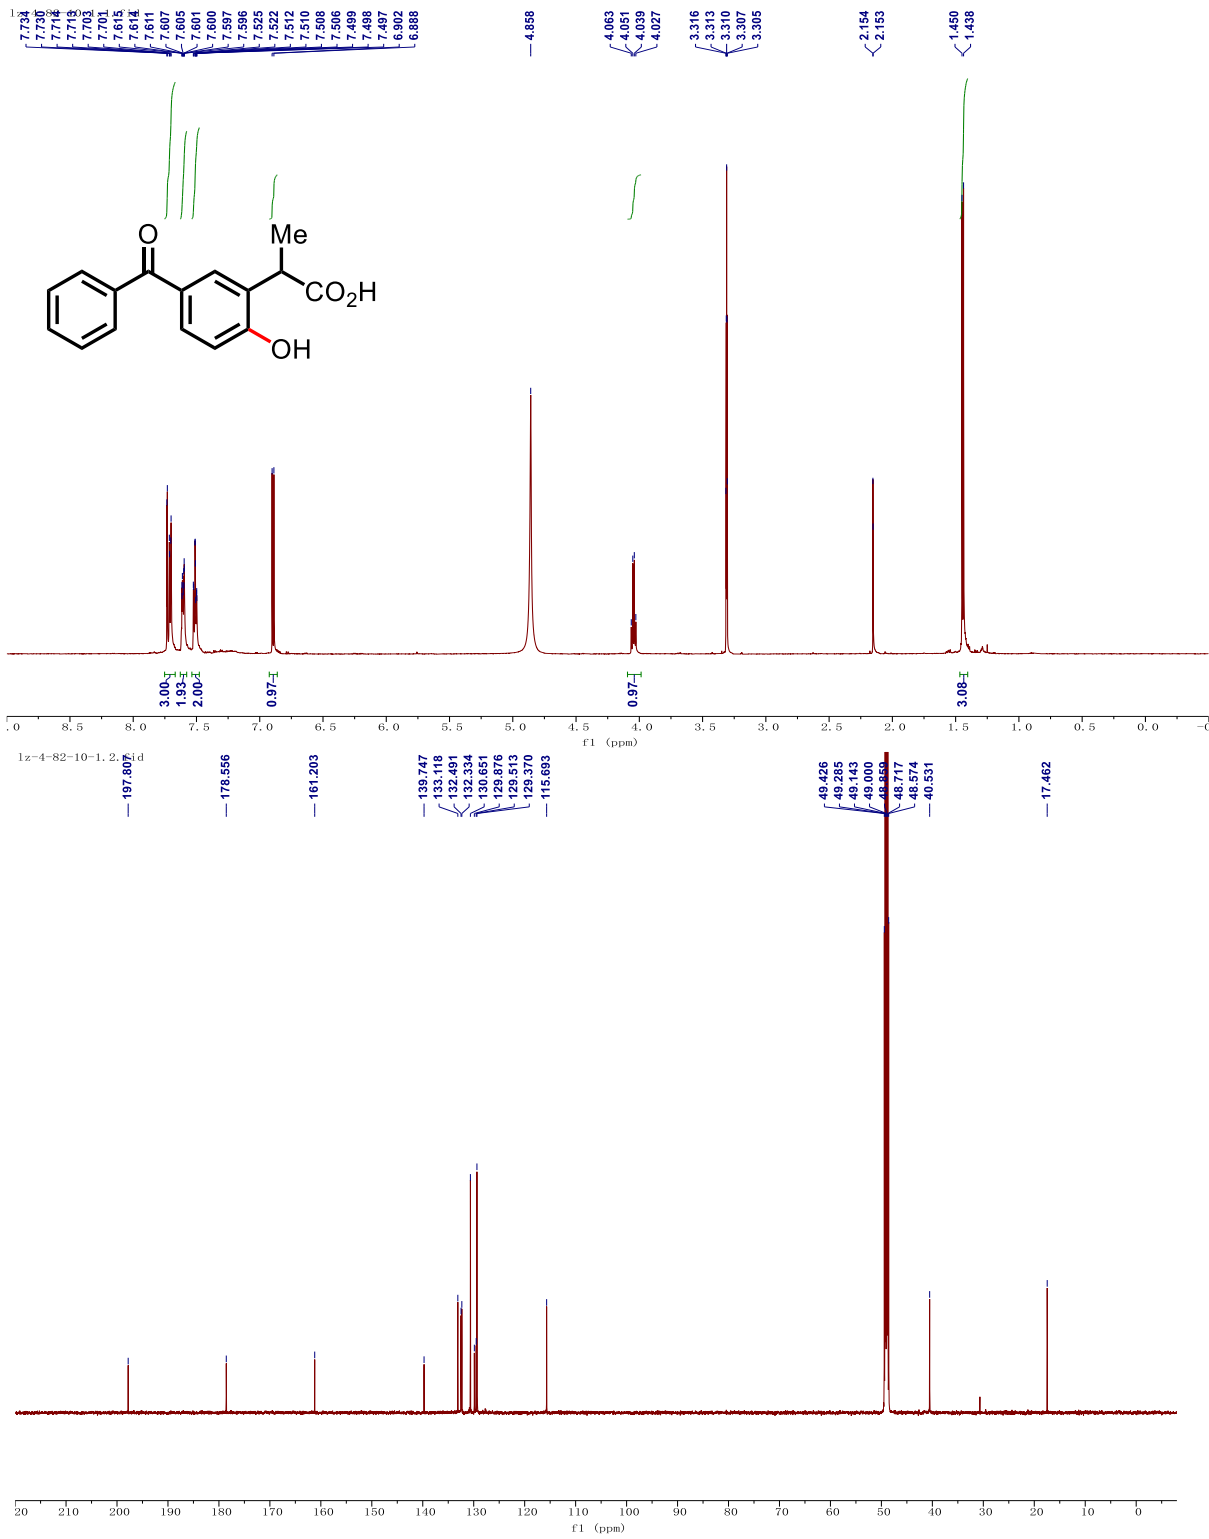

NMR Spectra of 2af

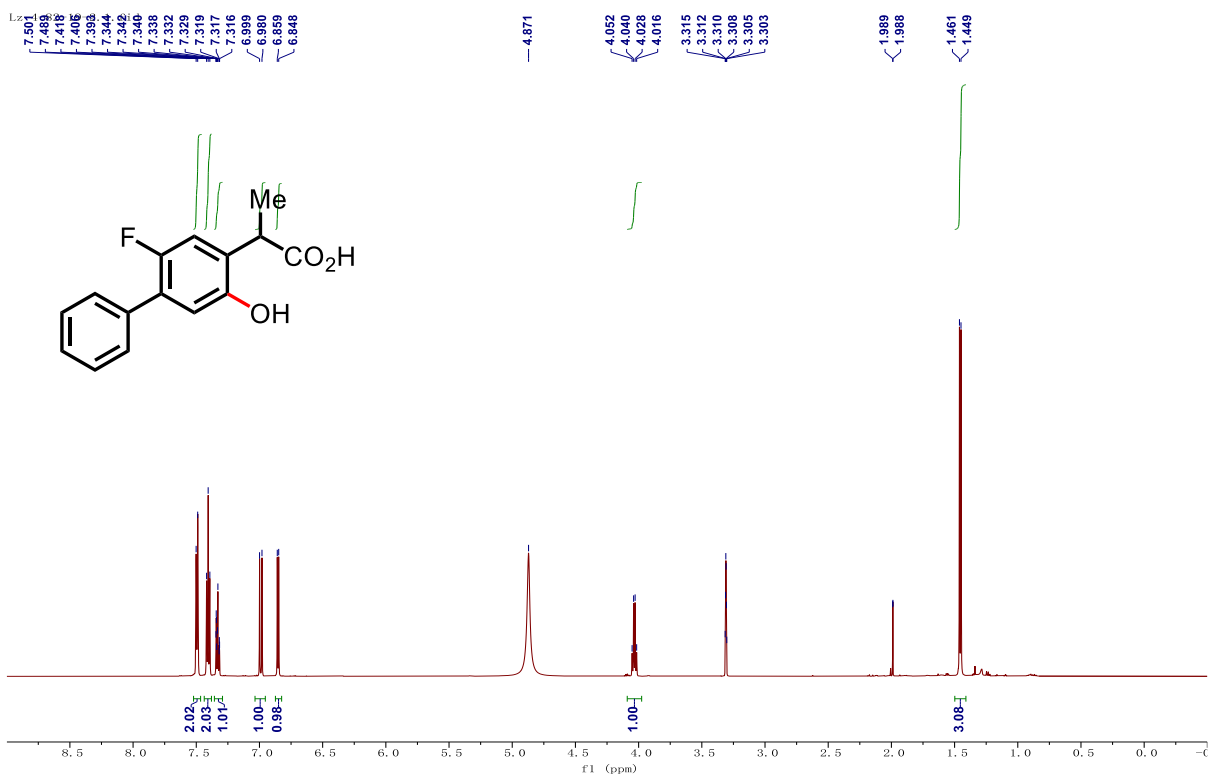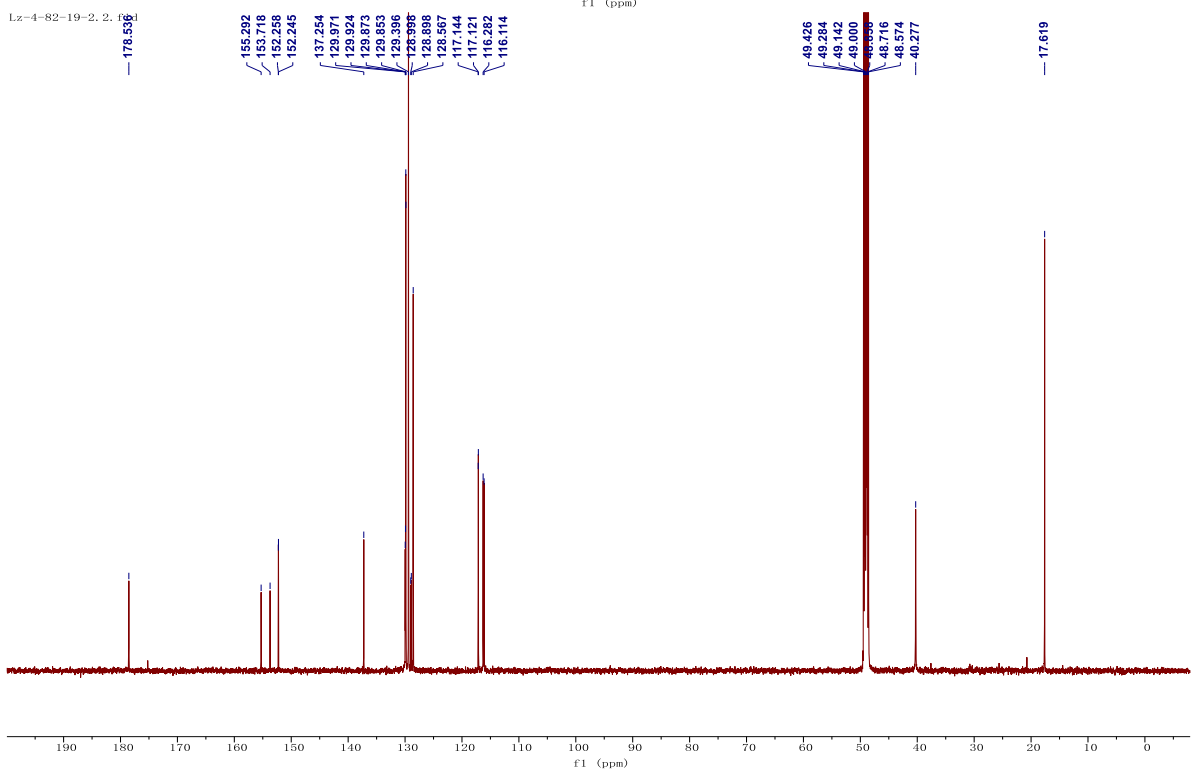

NMR Spectra of 2ag

1x-4-82-19-f1.2.fid

-134.879

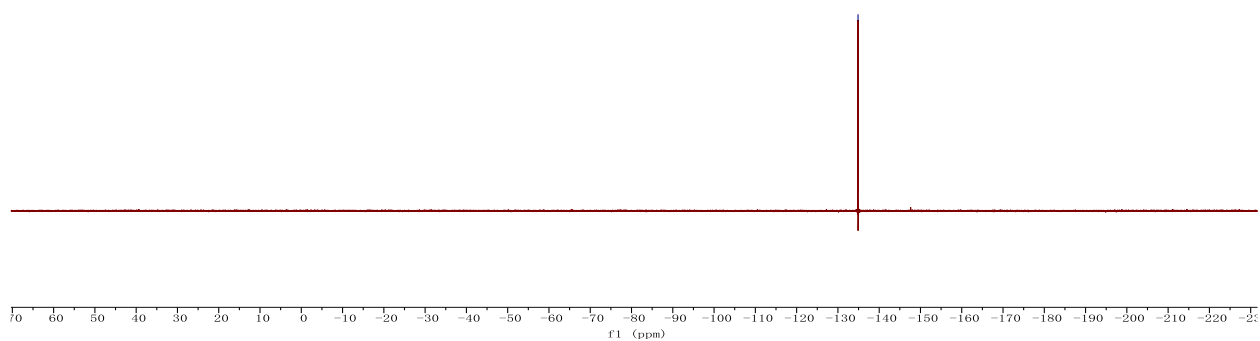

Lz-4-88-5-1.1.fid

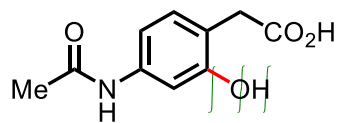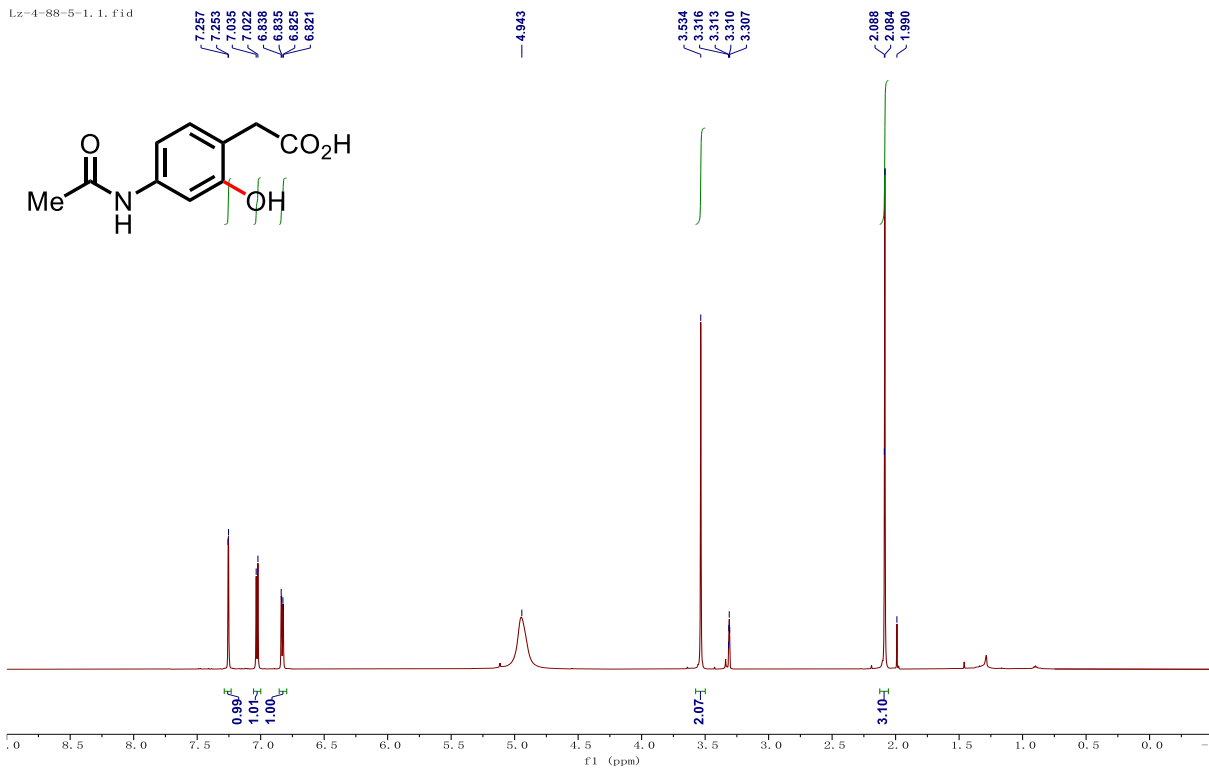

Lz-4-88-5-1.2.fid

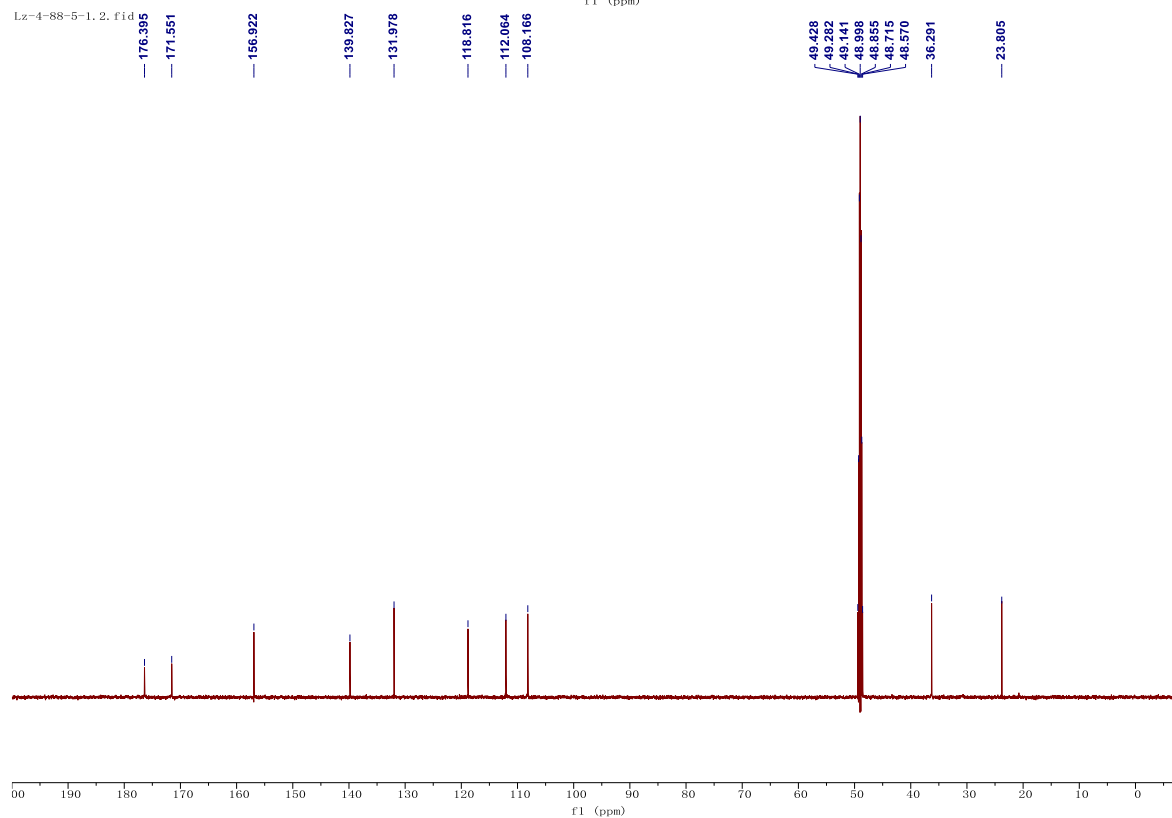

NMR Spectra of 2ah

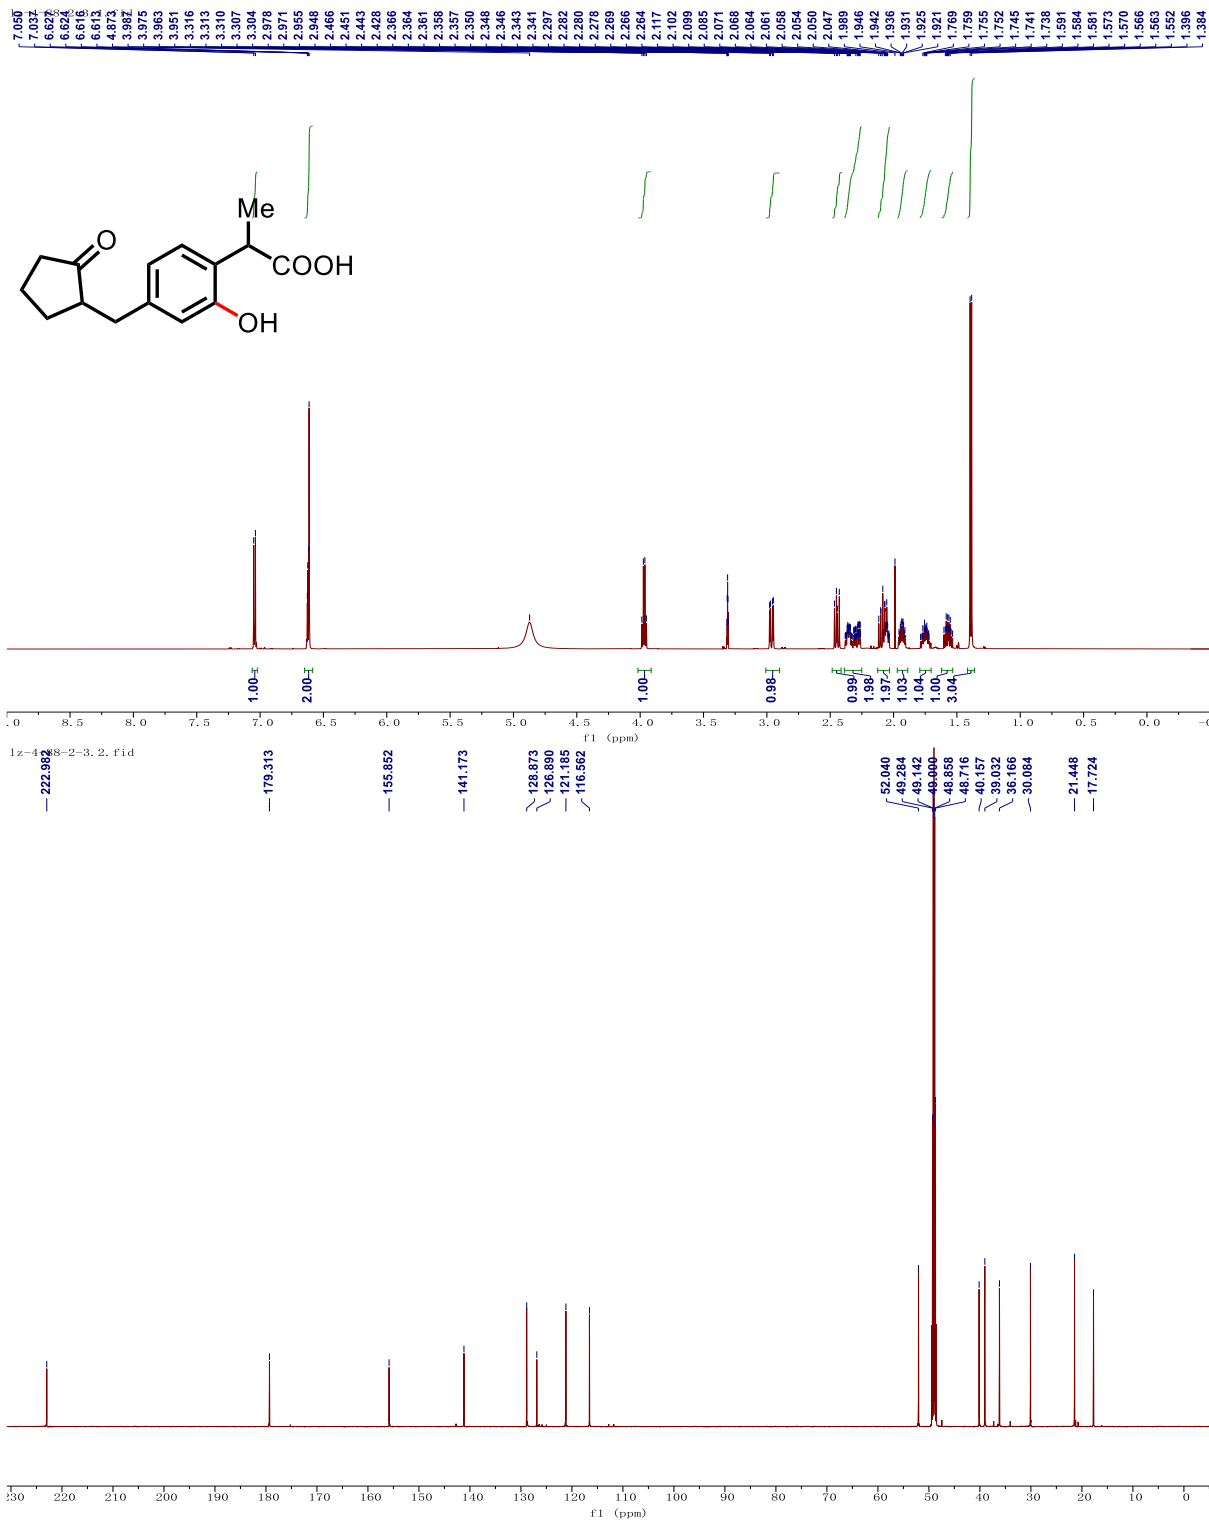

NMR Spectra of **2ai**

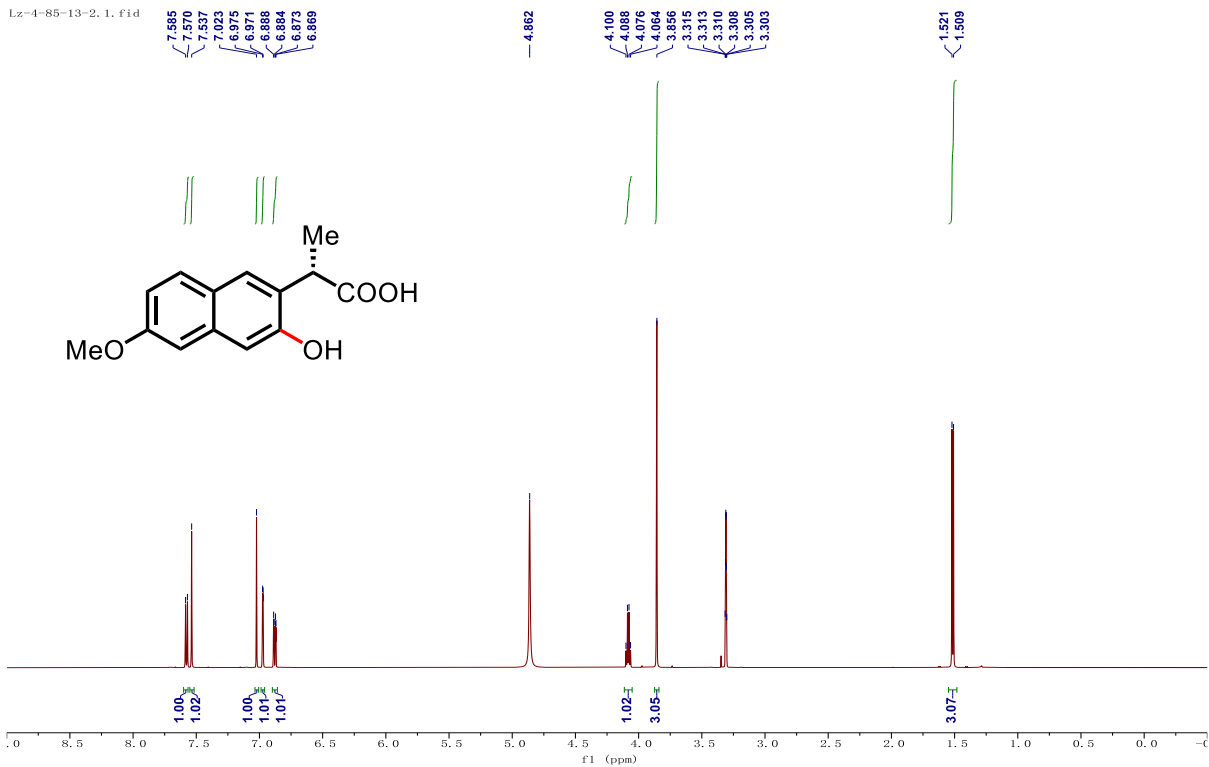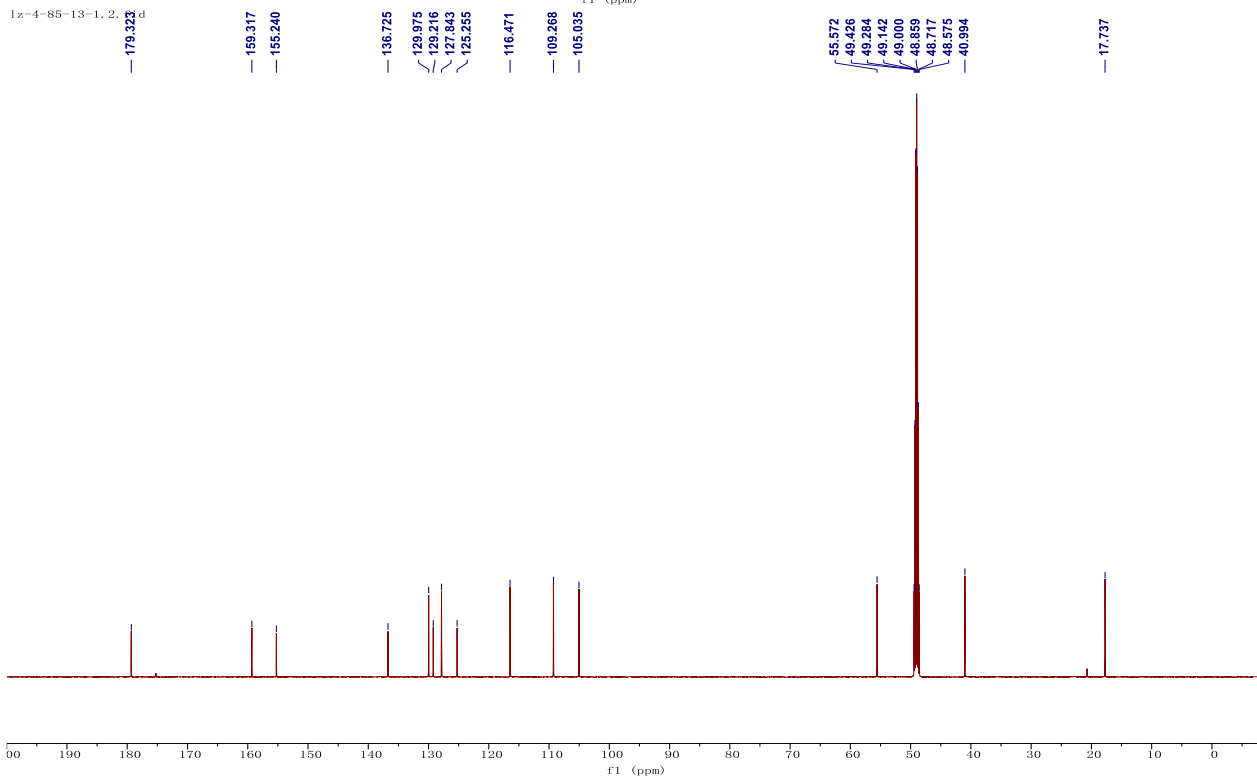

NMR Spectra of **2aj**

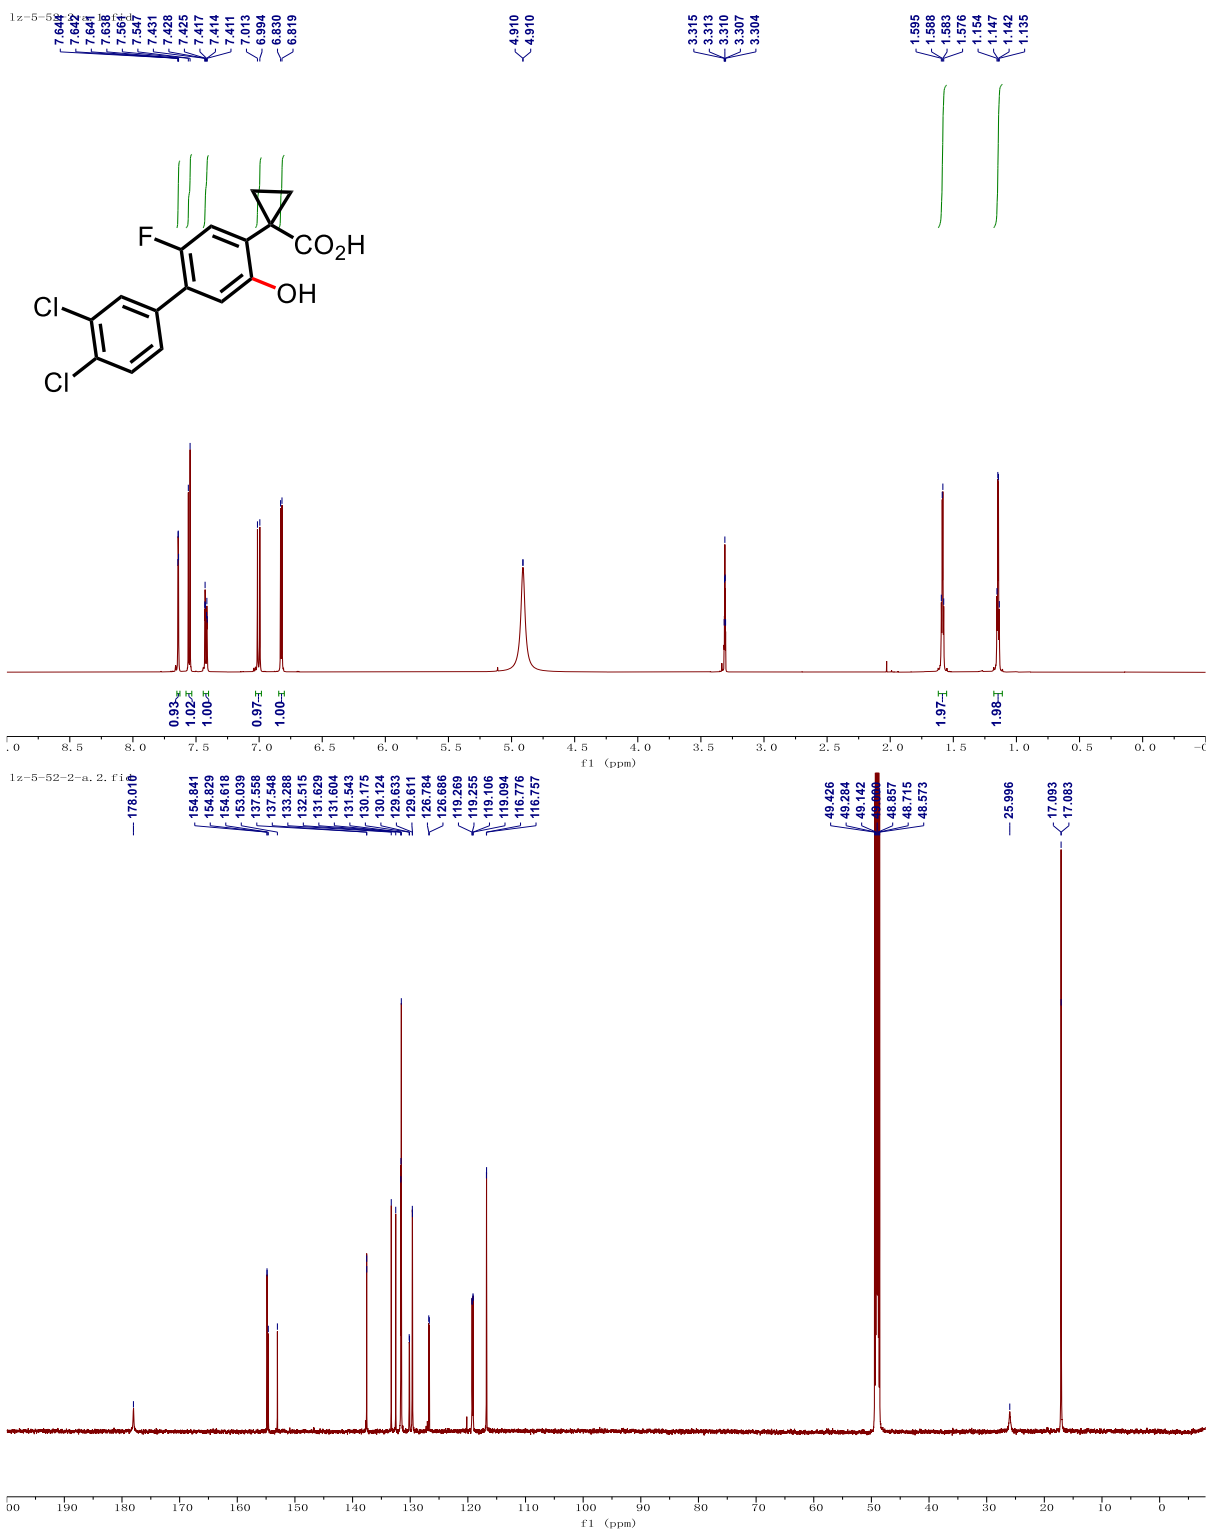

NMR Spectra of 2ak



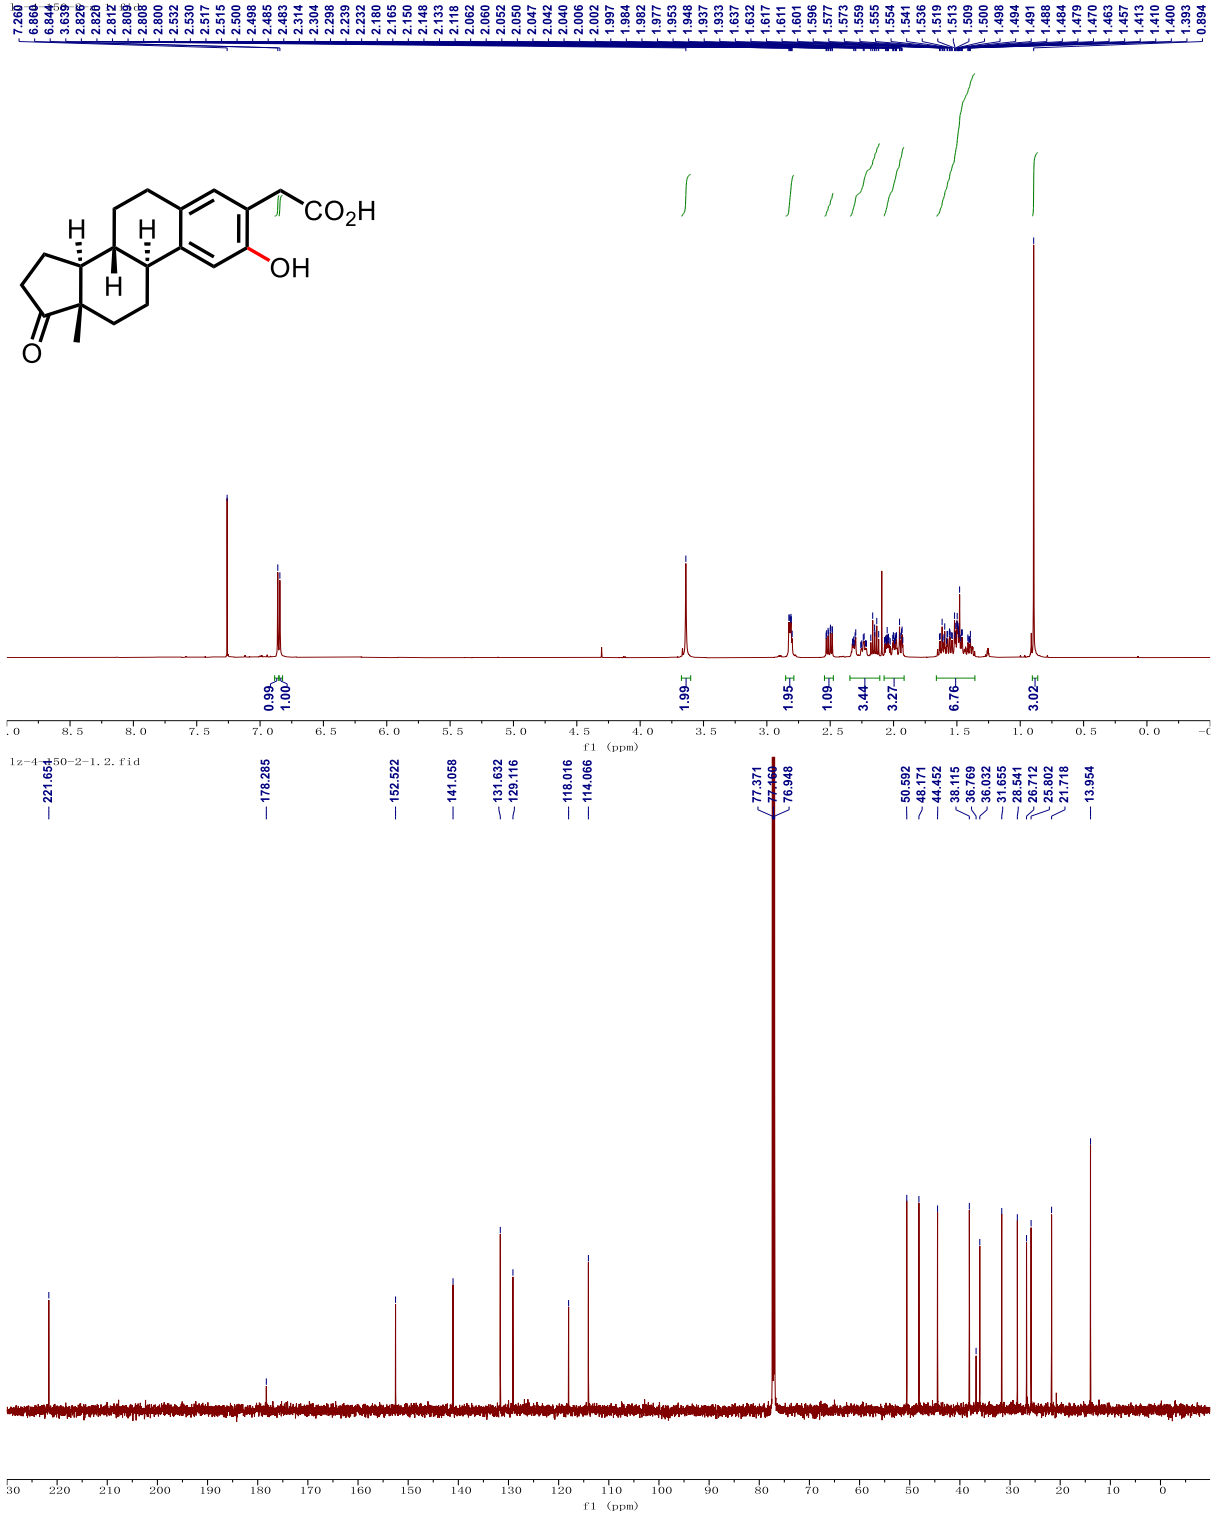

NMR Spectra of 2a1

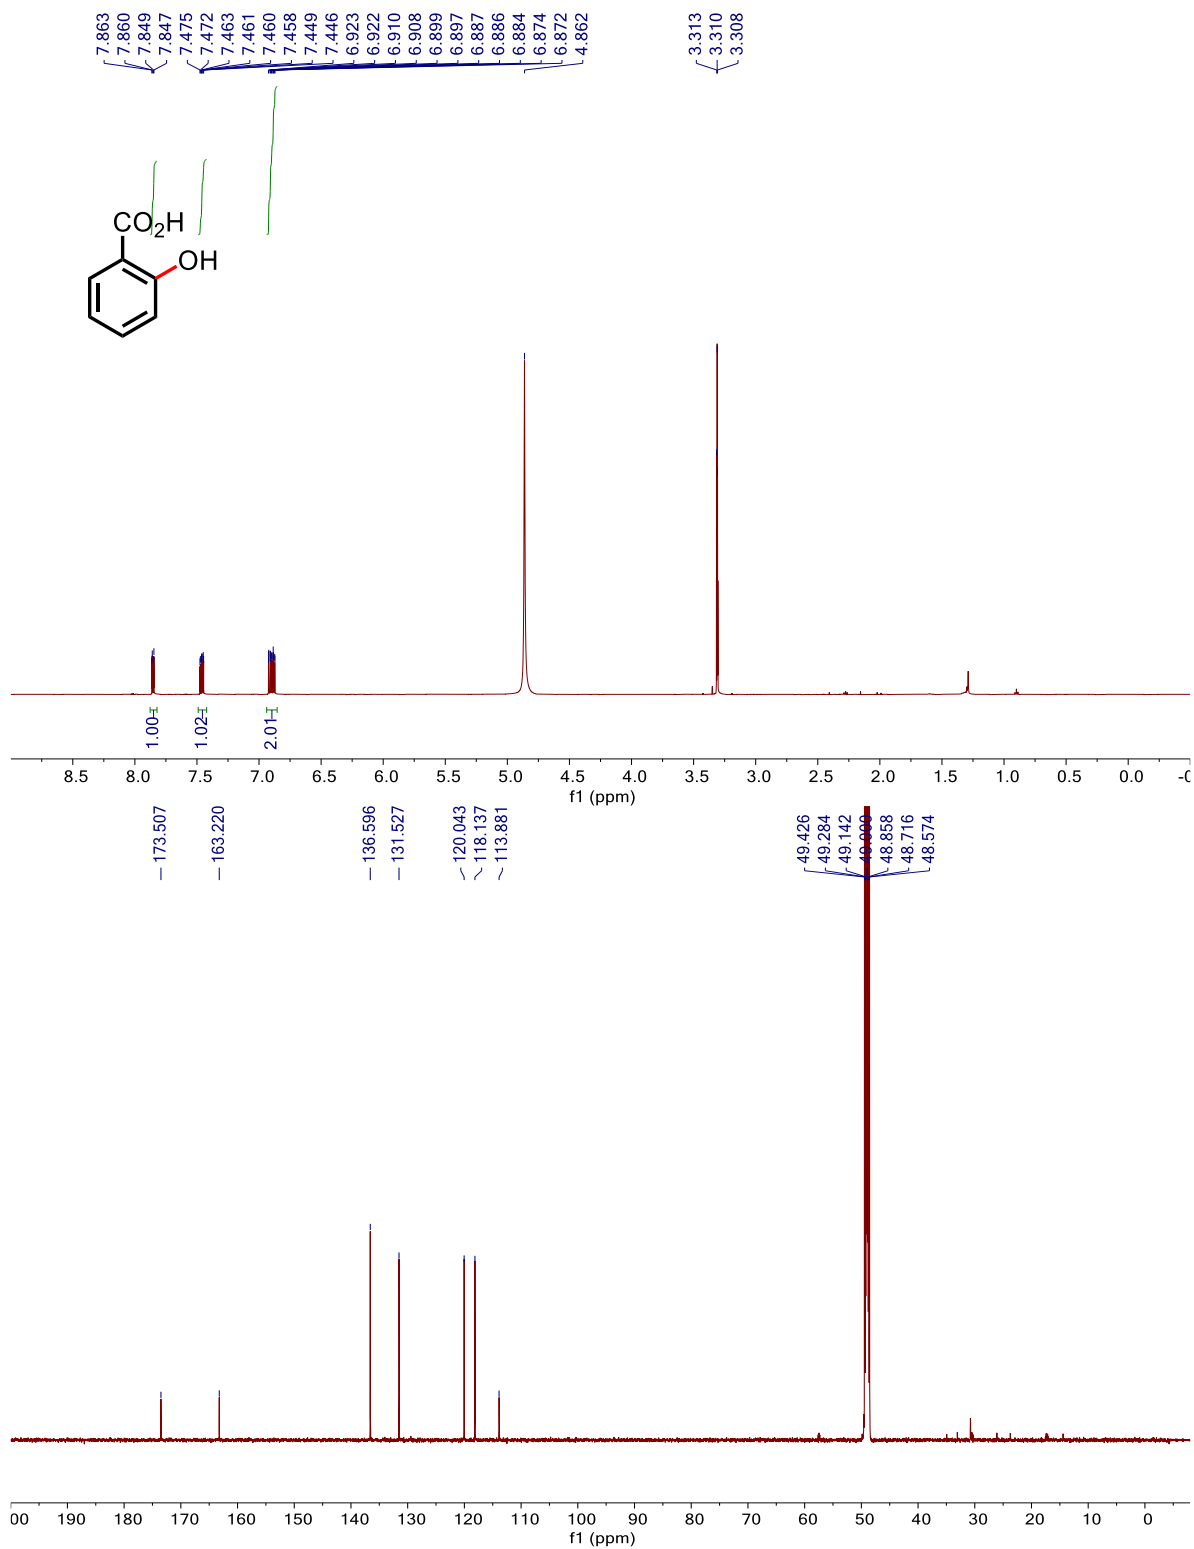

NMR Spectra of **4a**

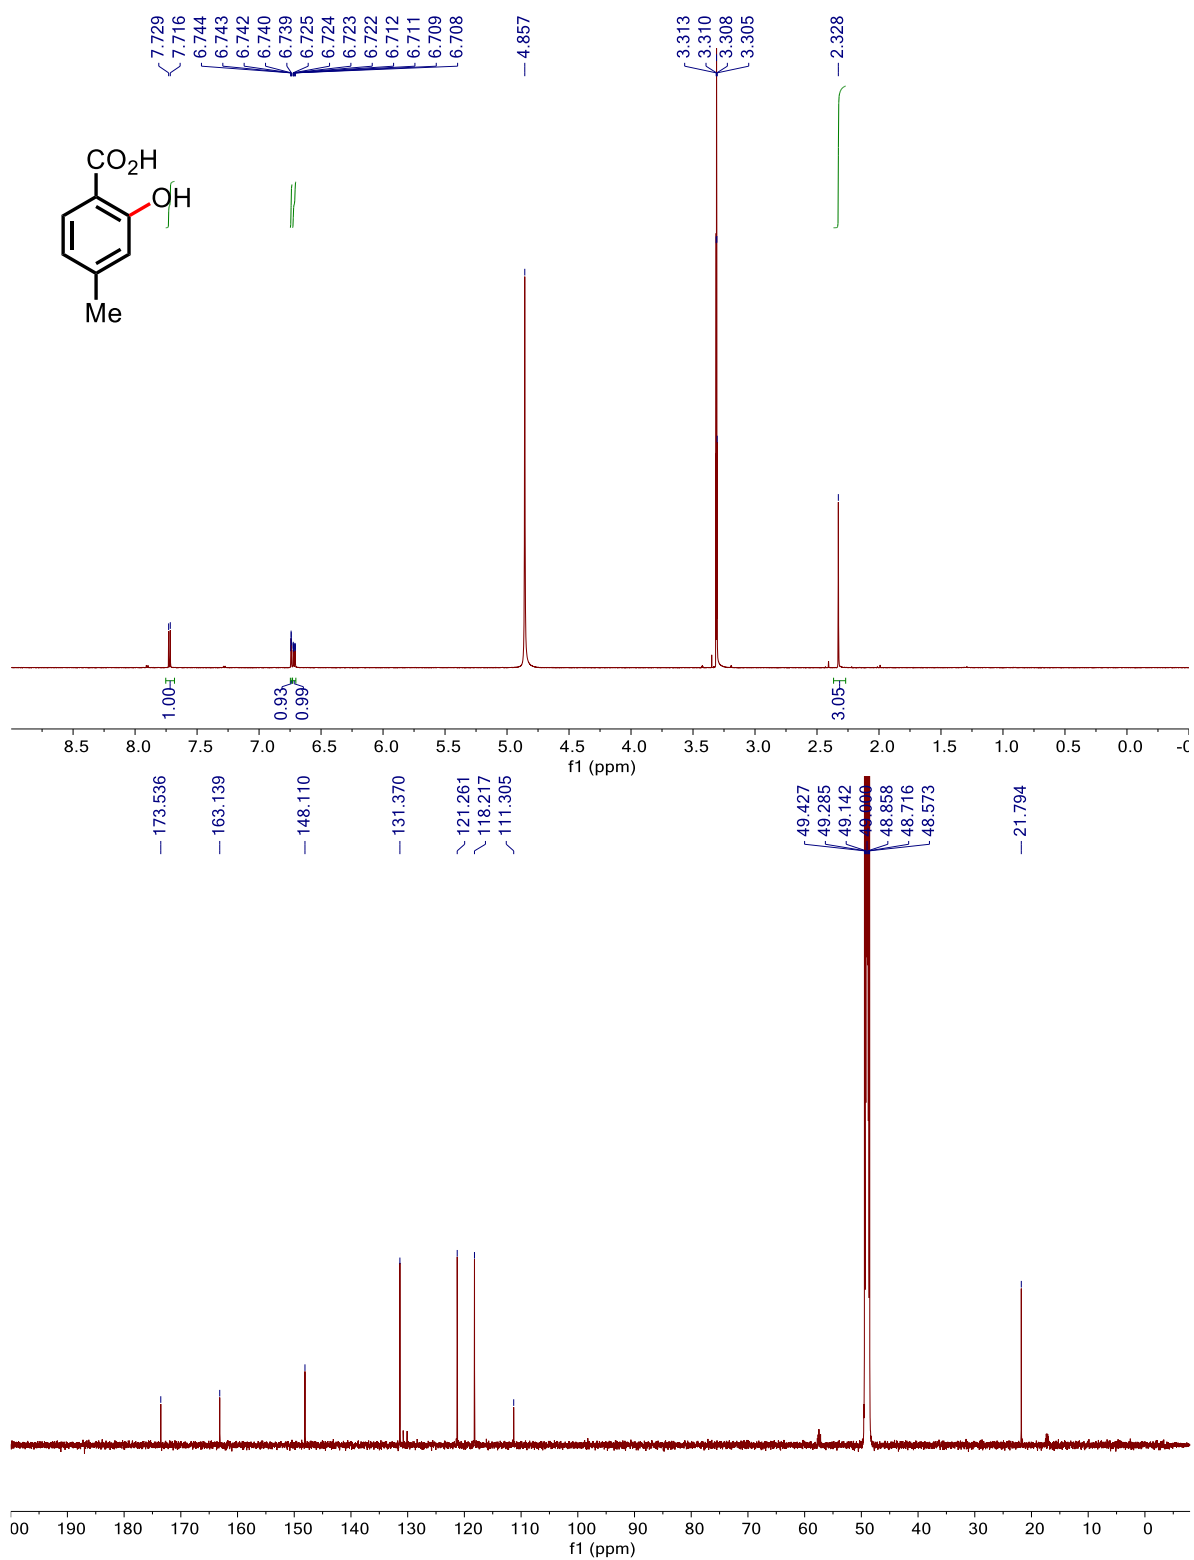

NMR Spectra of 4b

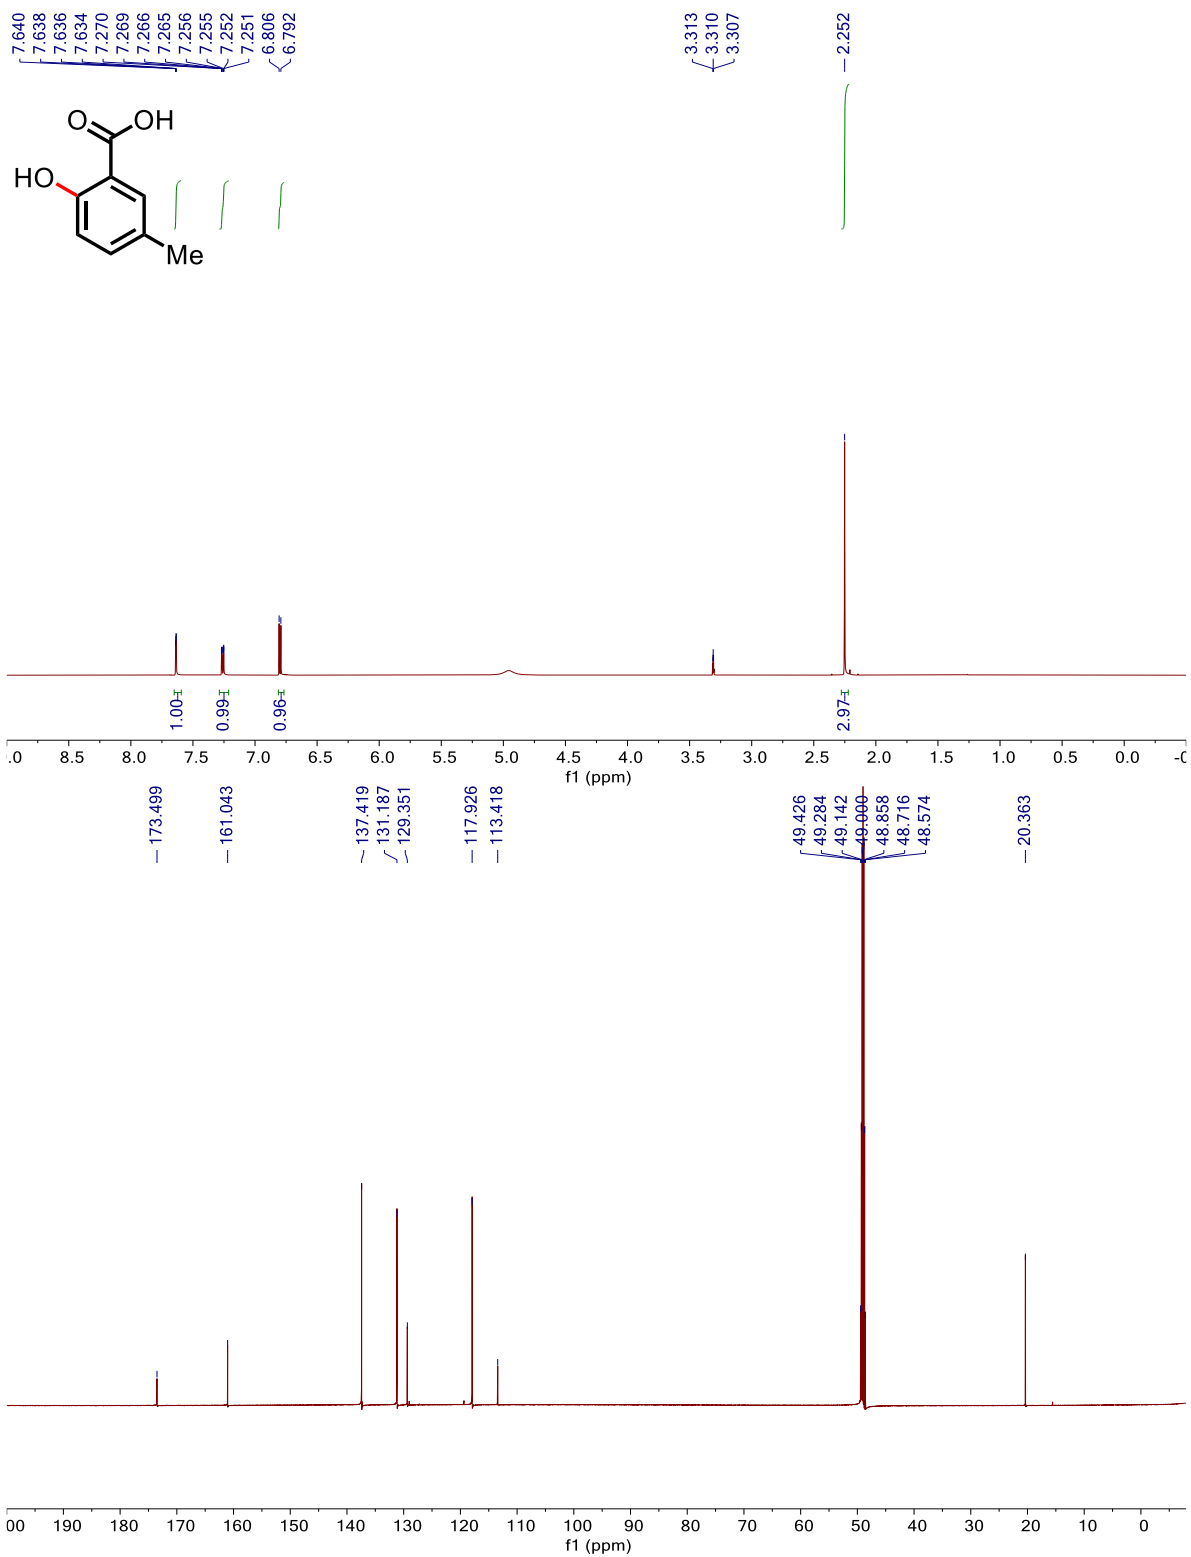

NMR Spectra of **4c**

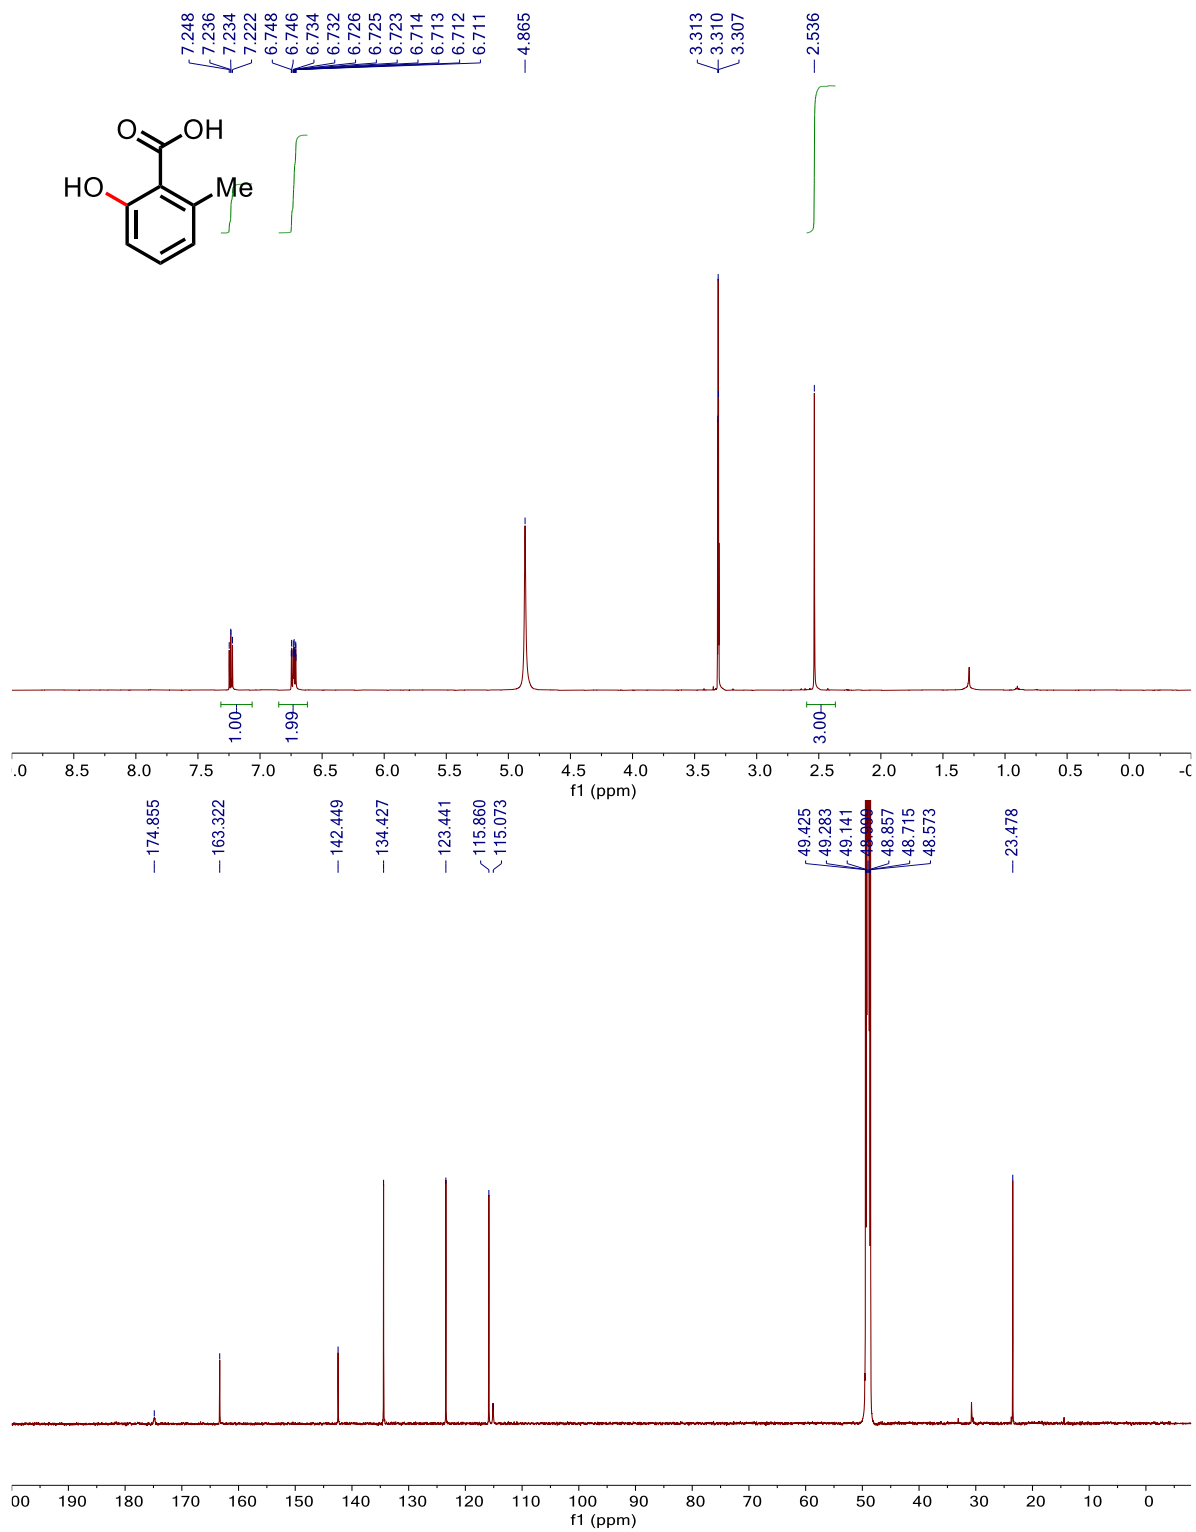

NMR Spectra of 4d

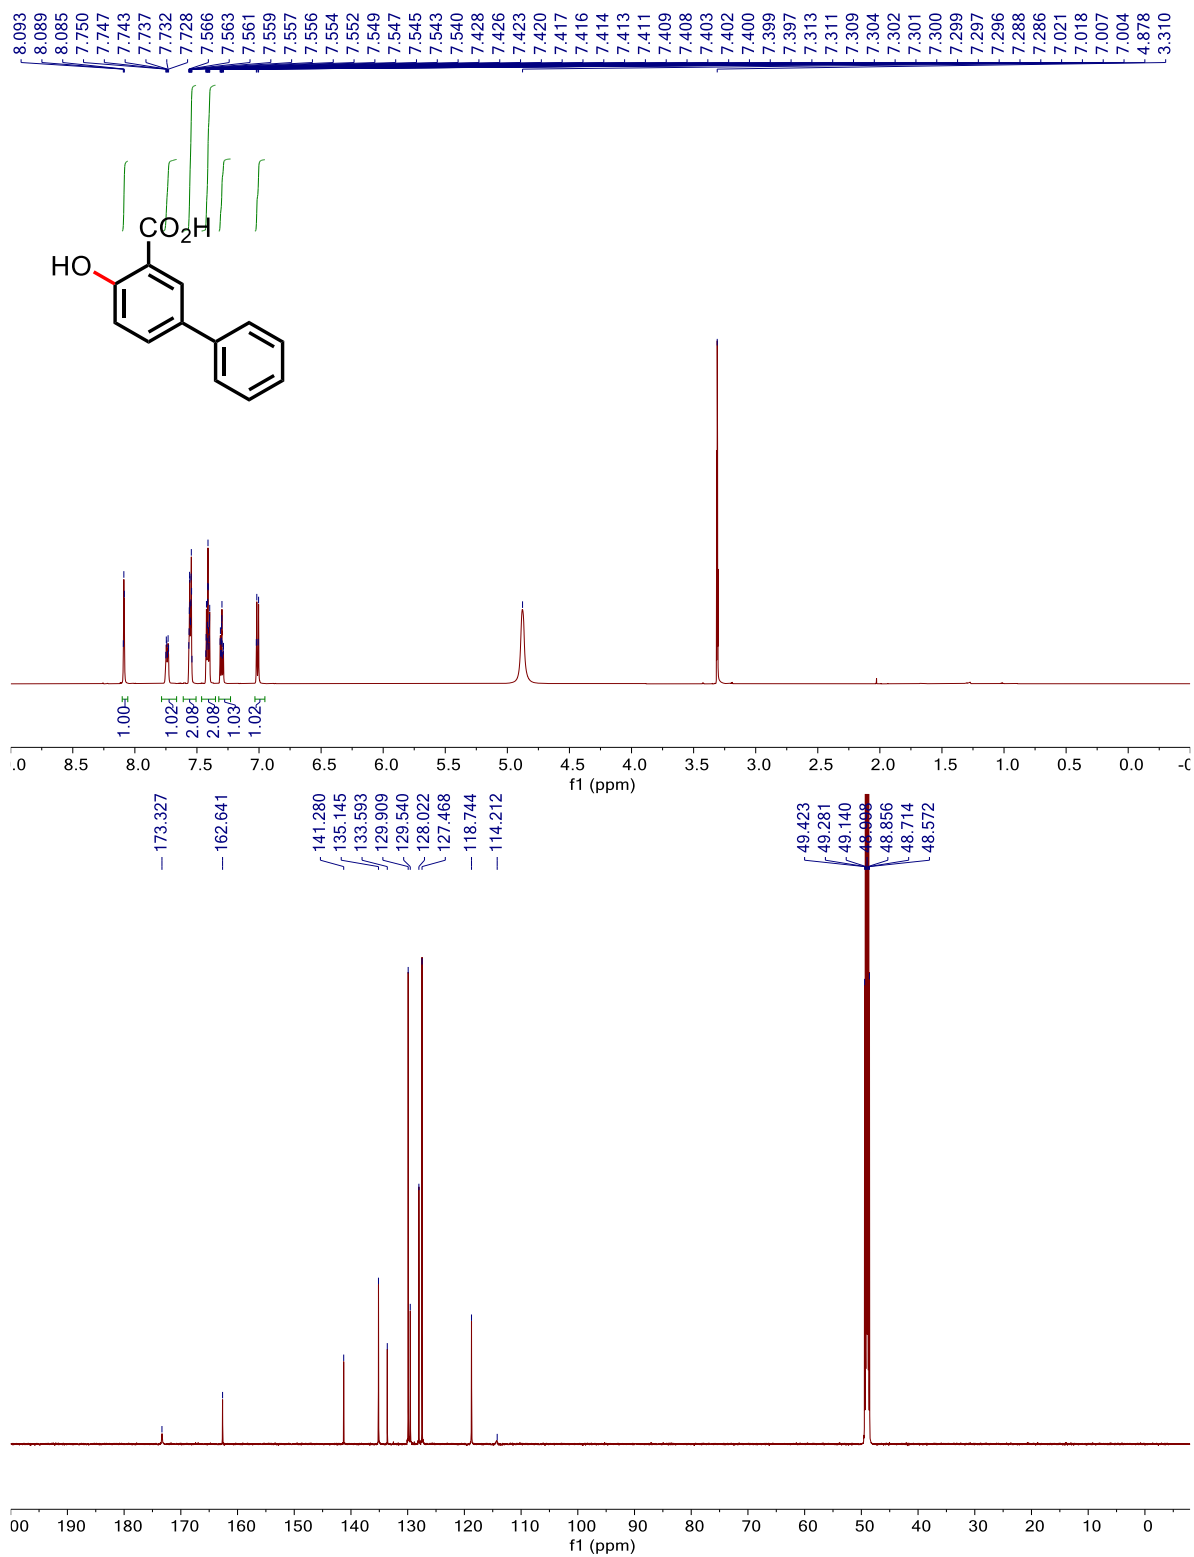

NMR Spectra of 4e

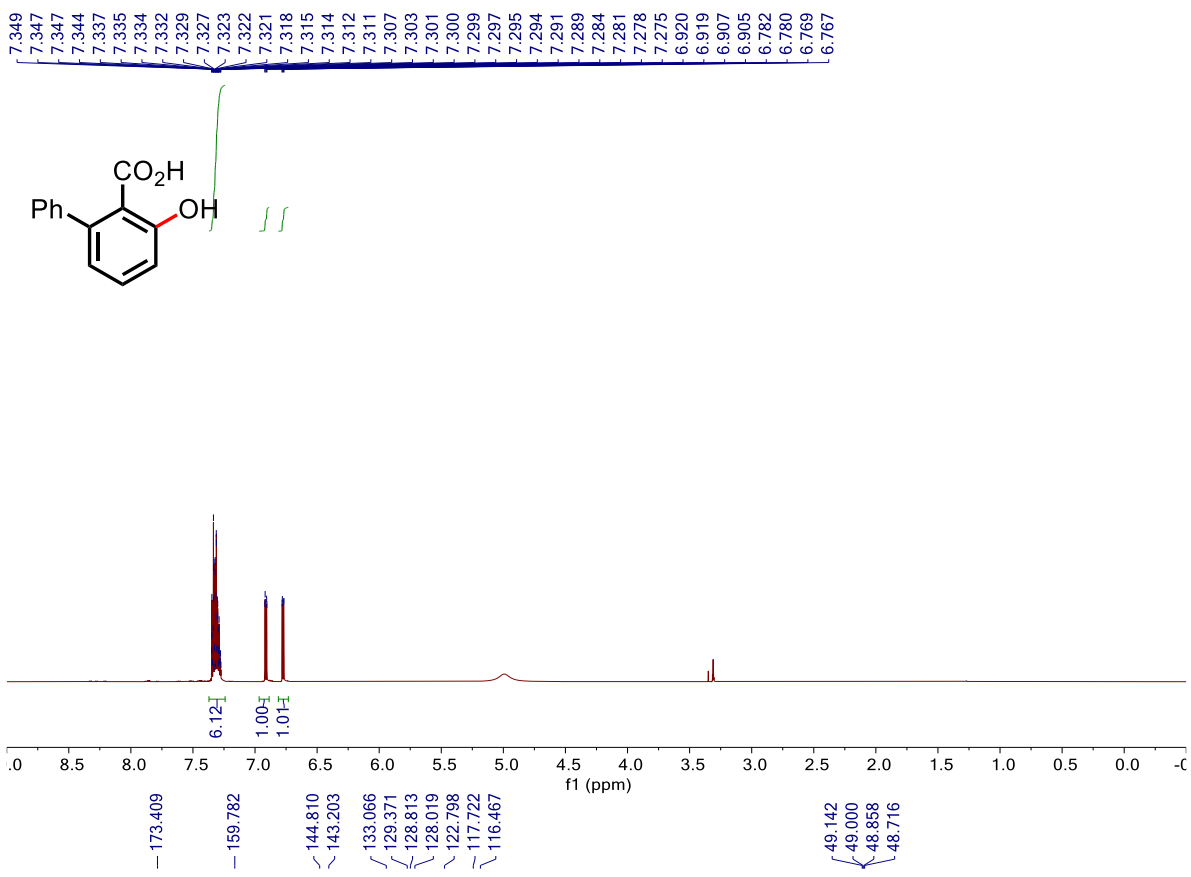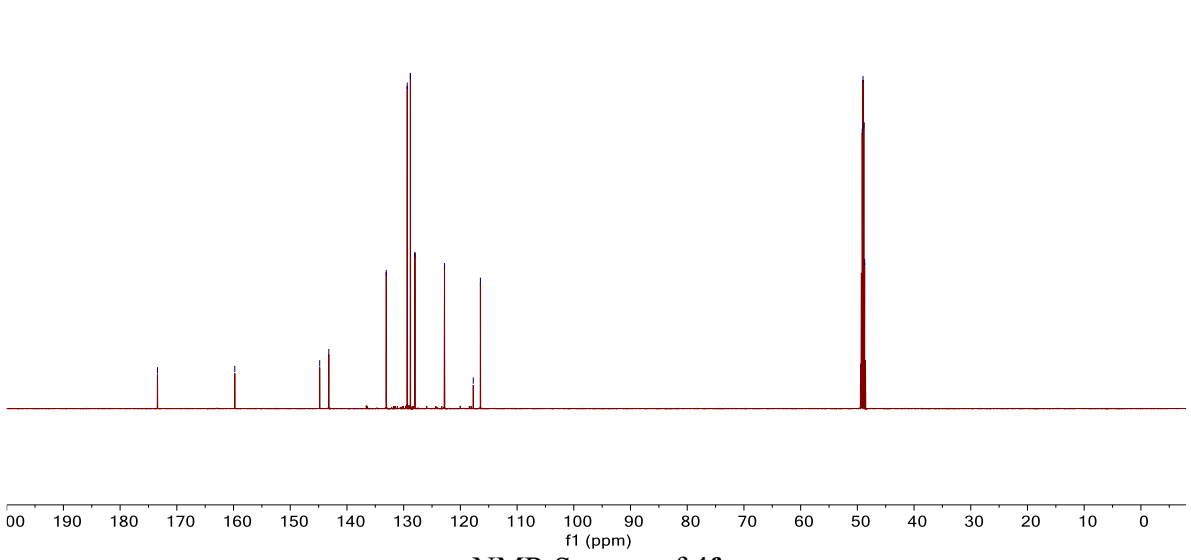

NMR Spectra of **4f**

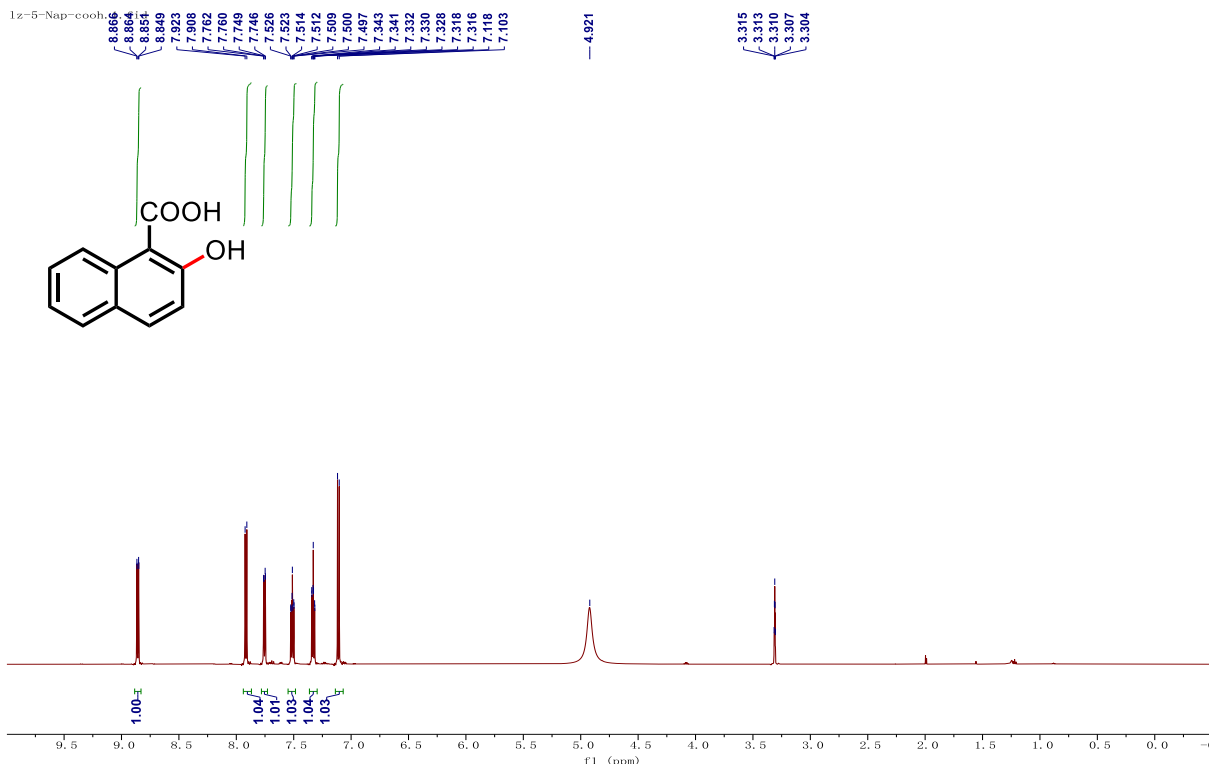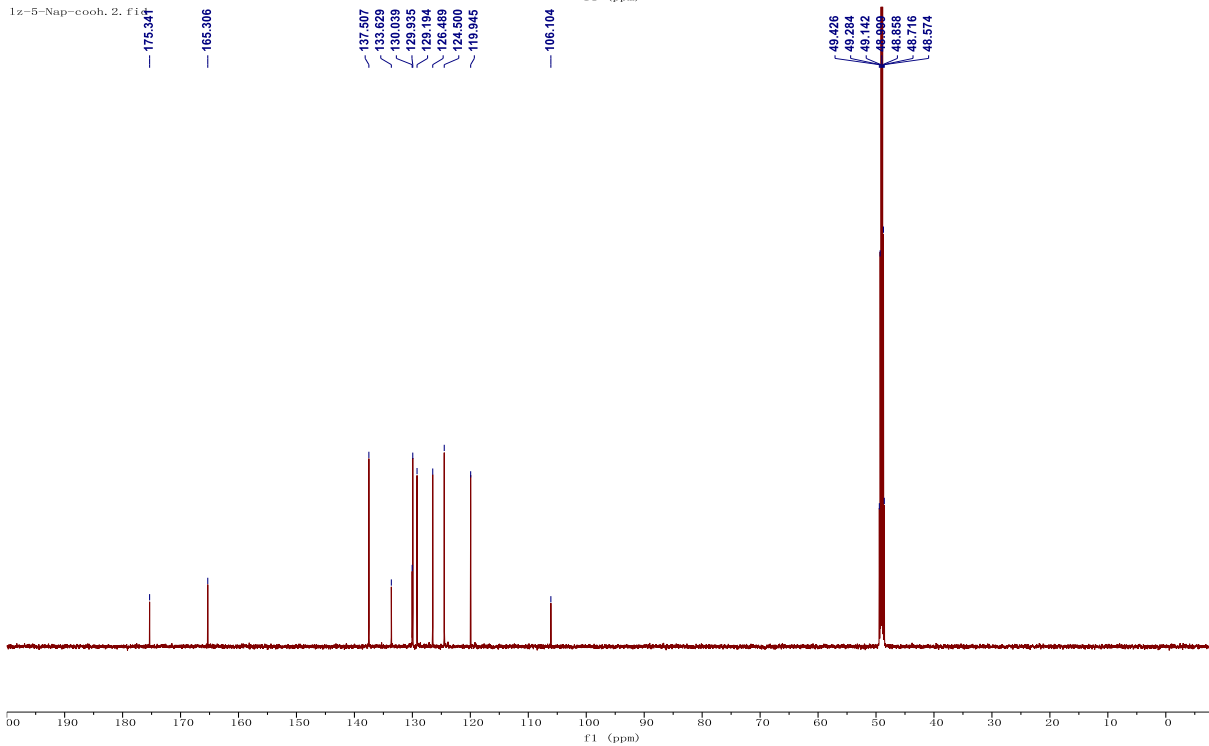

NMR Spectra of 4g



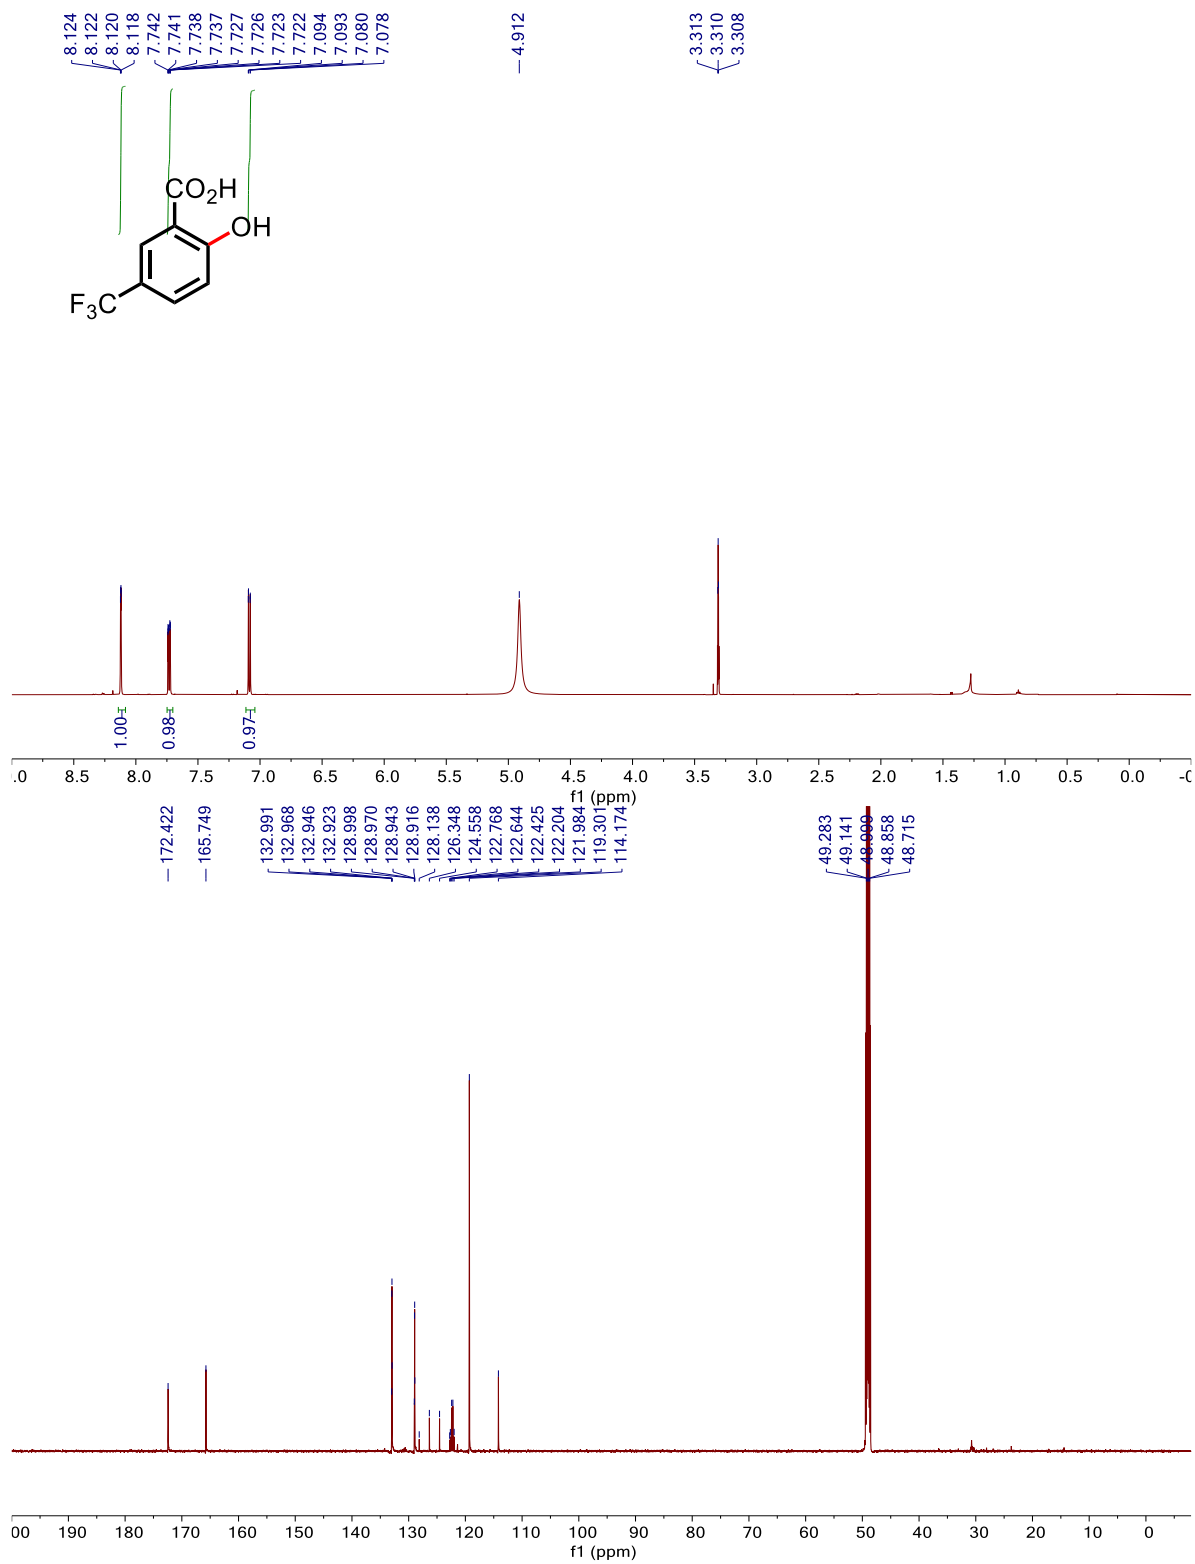

NMR Spectra of **4h**

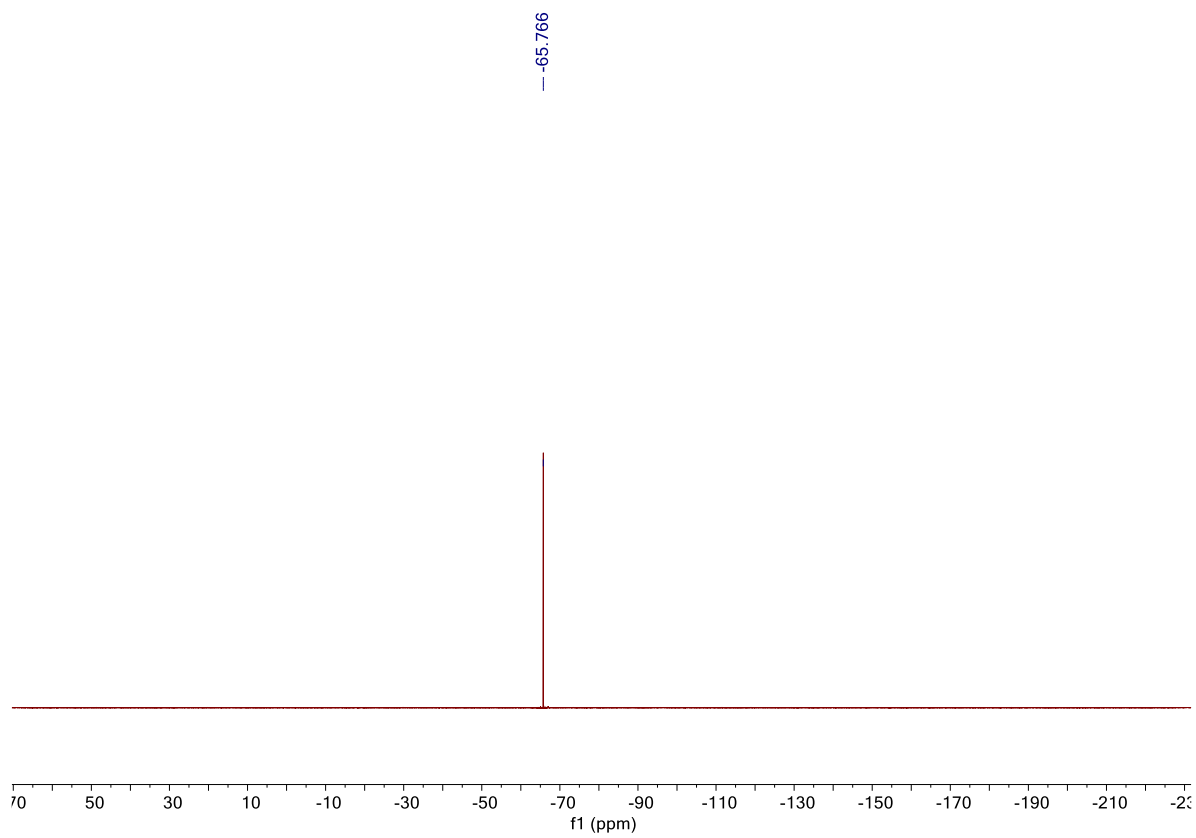

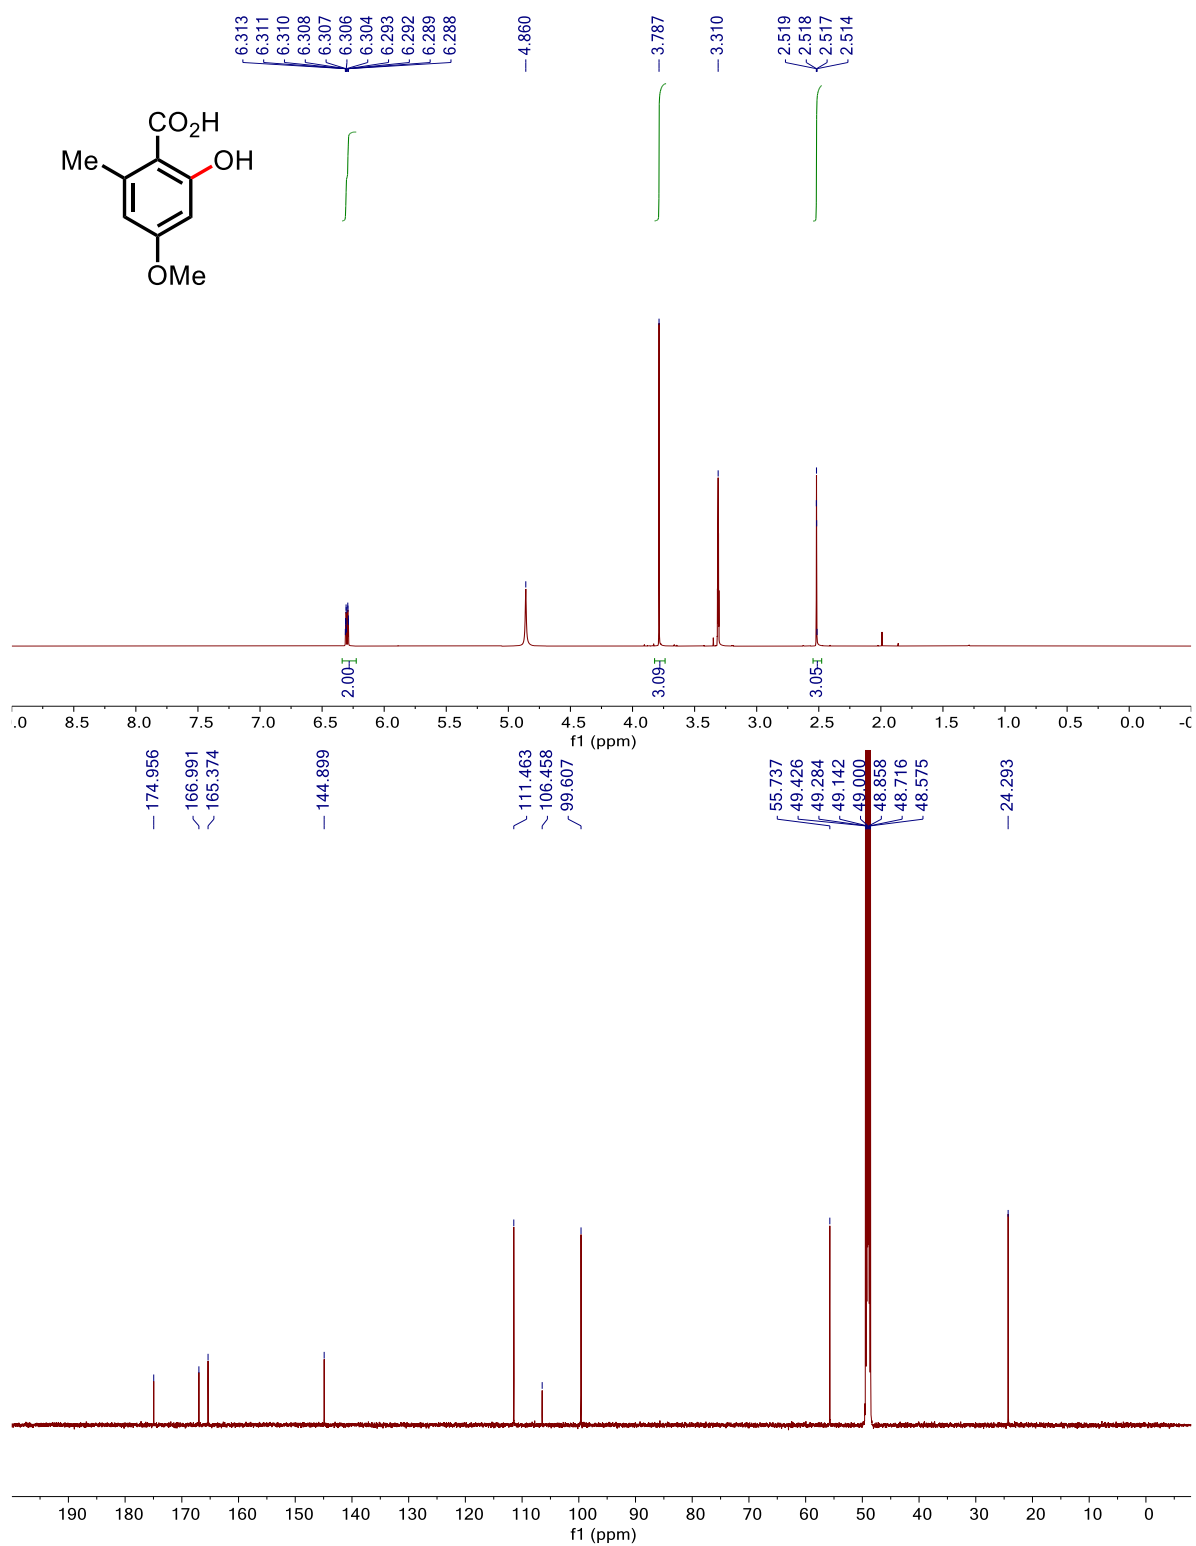

NMR Spectra of **4i**

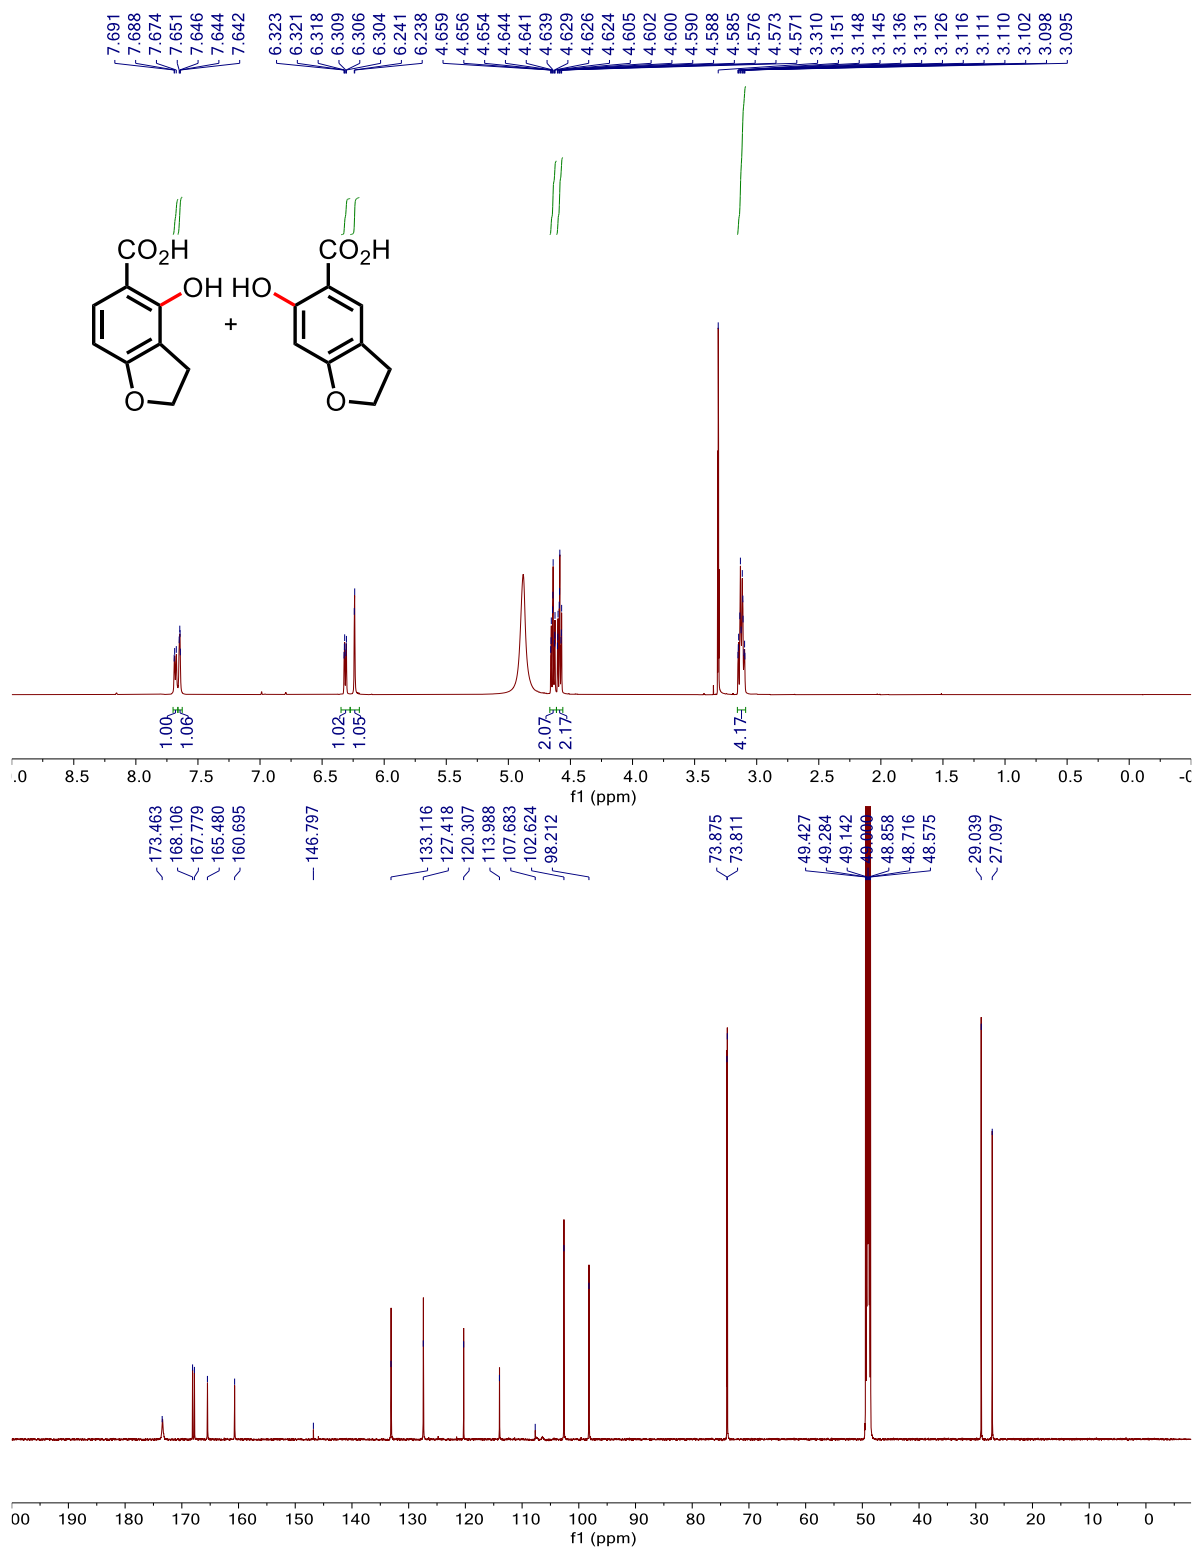

NMR Spectra of 4j and 4j'

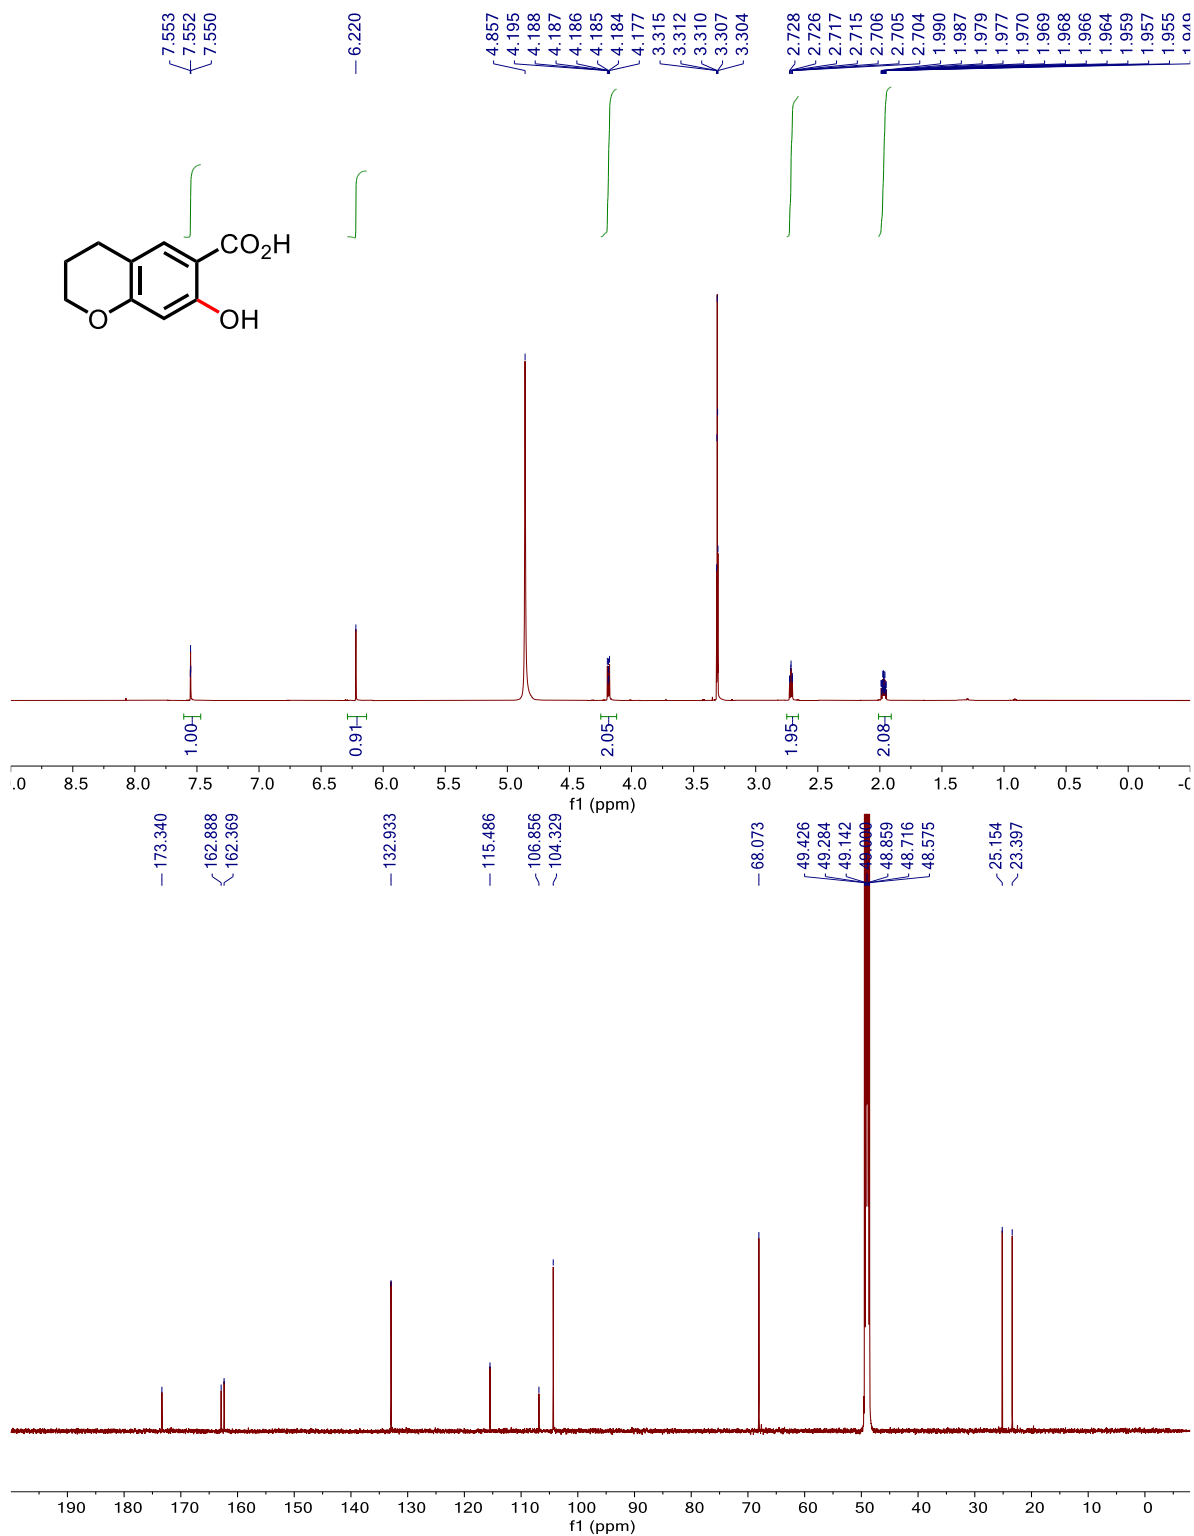

NMR Spectra of **4k**

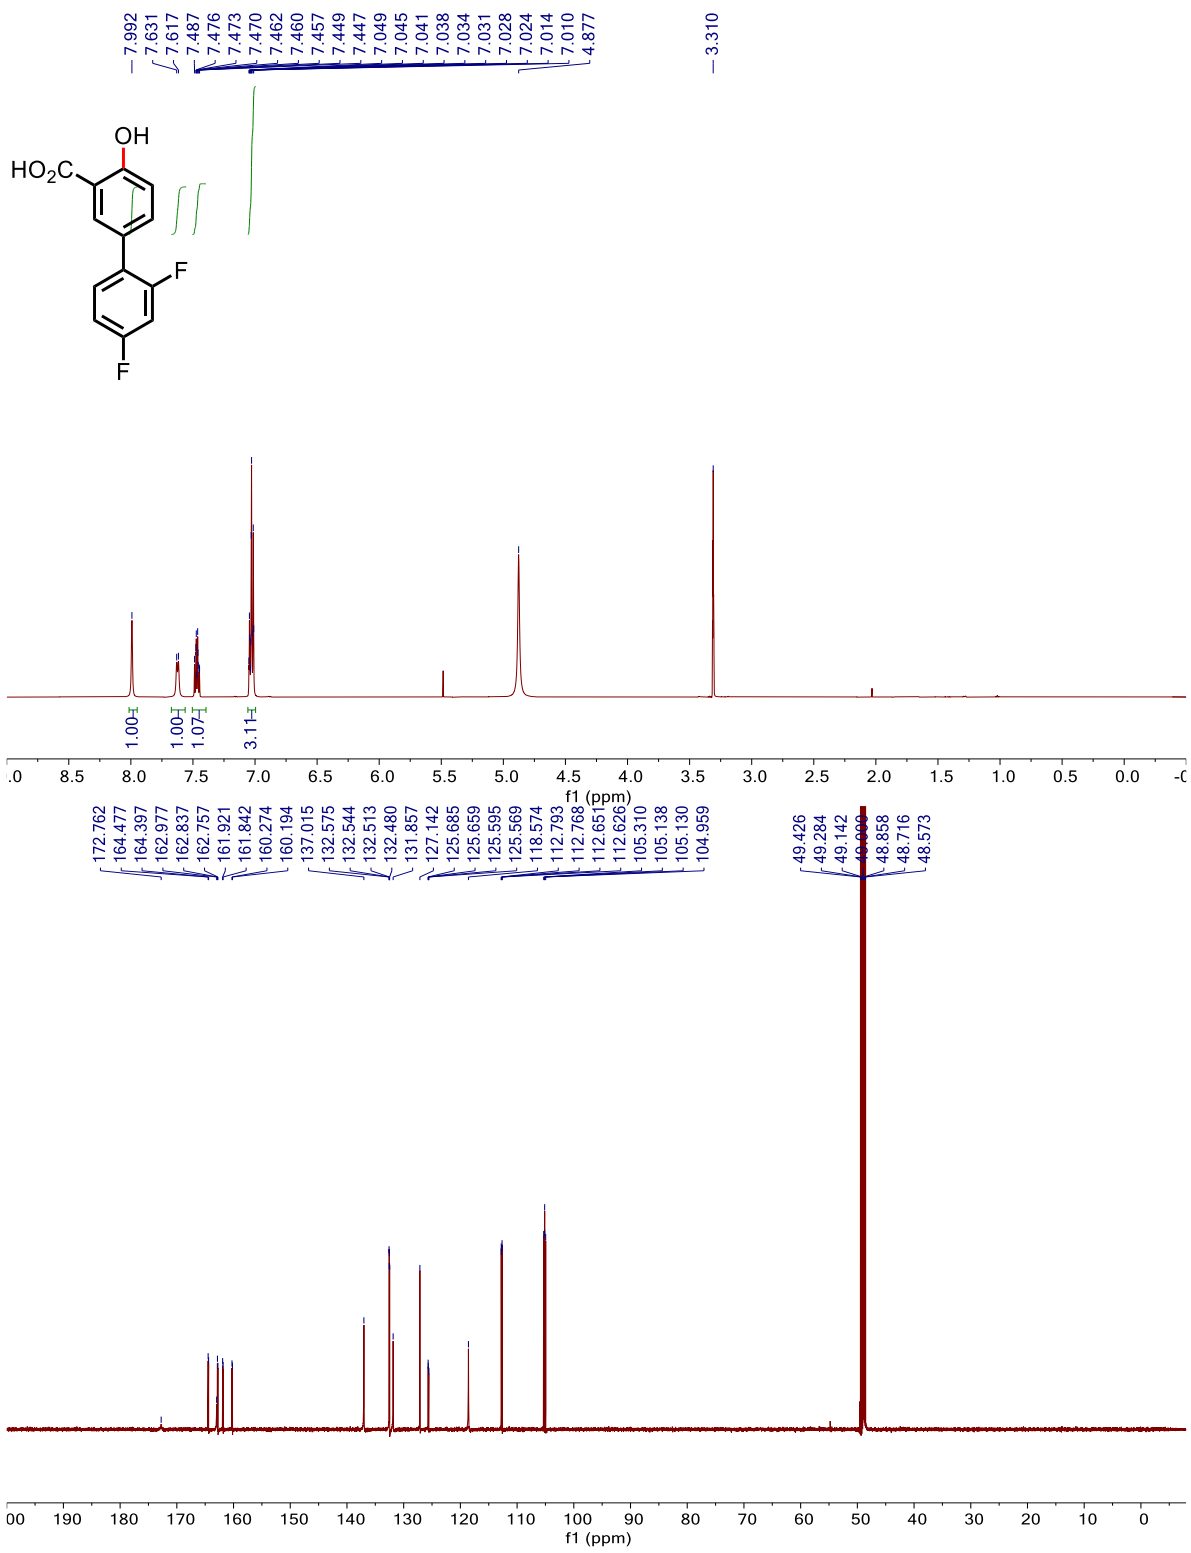

NMR Spectra of **4I**

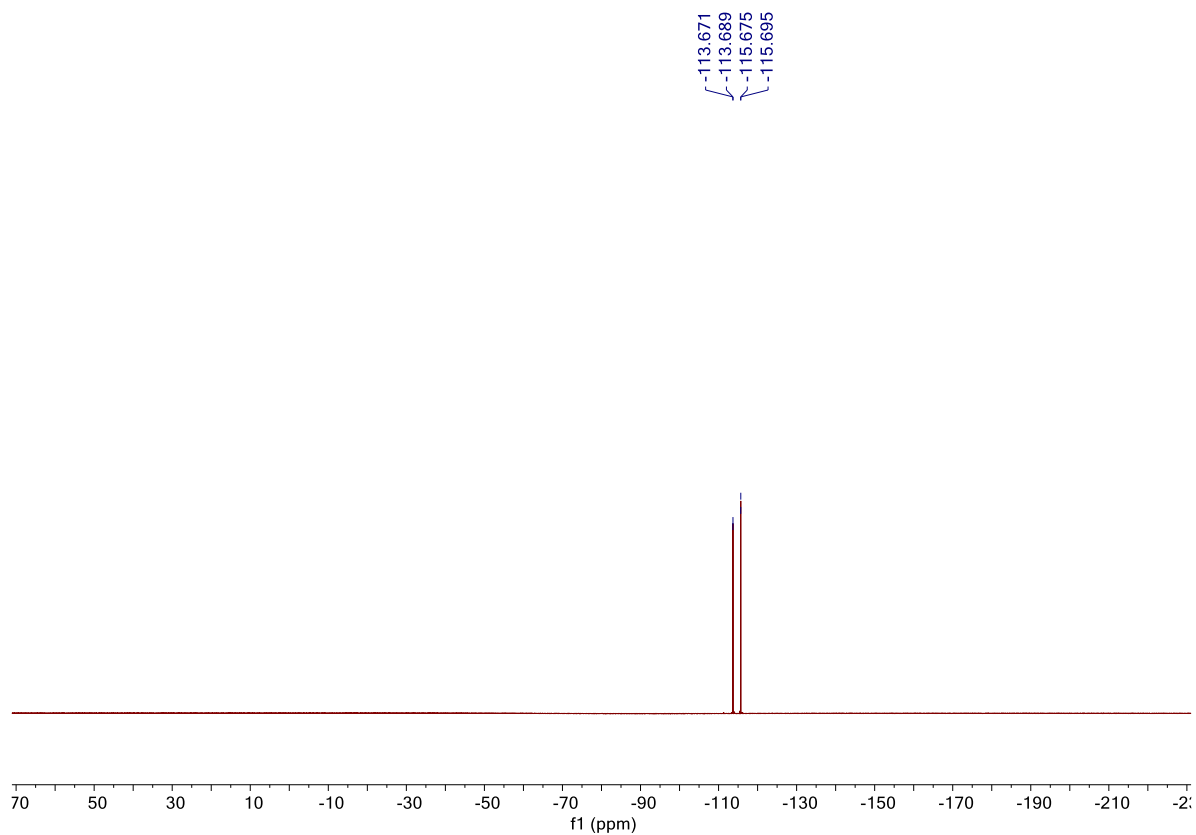

NMR Spectra of **4I**

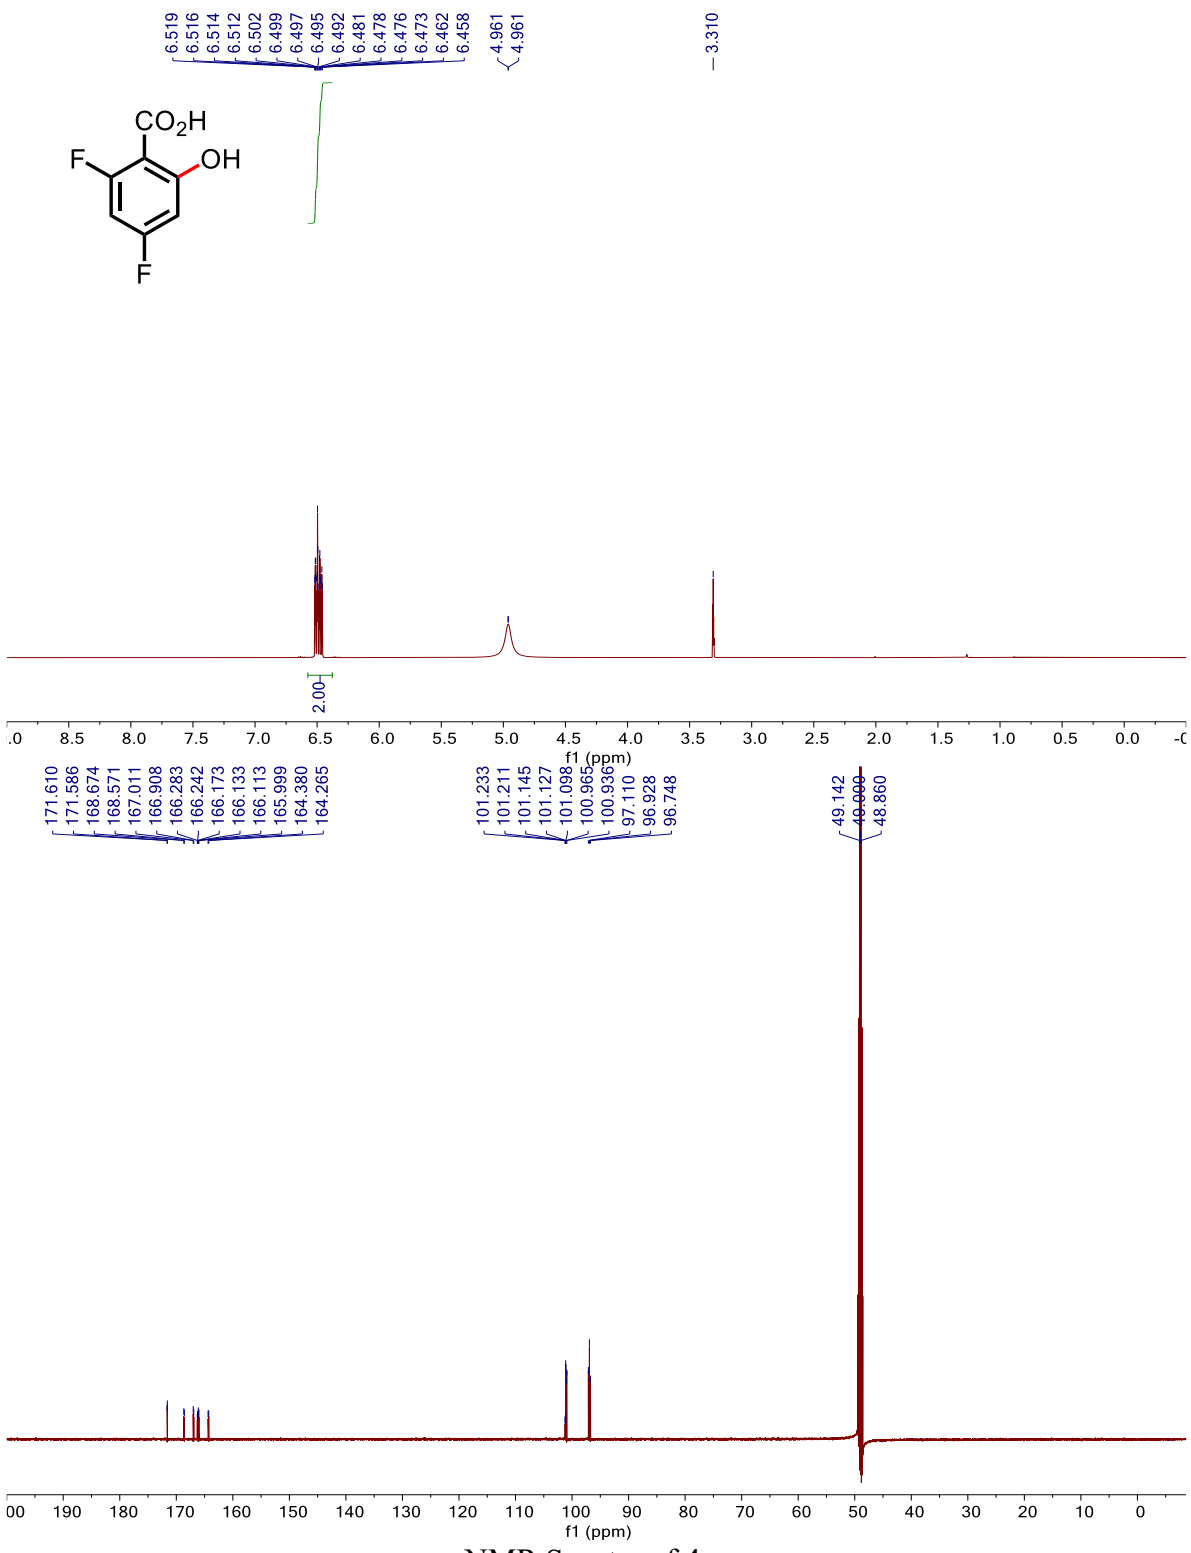

NMR Spectra of **4m**



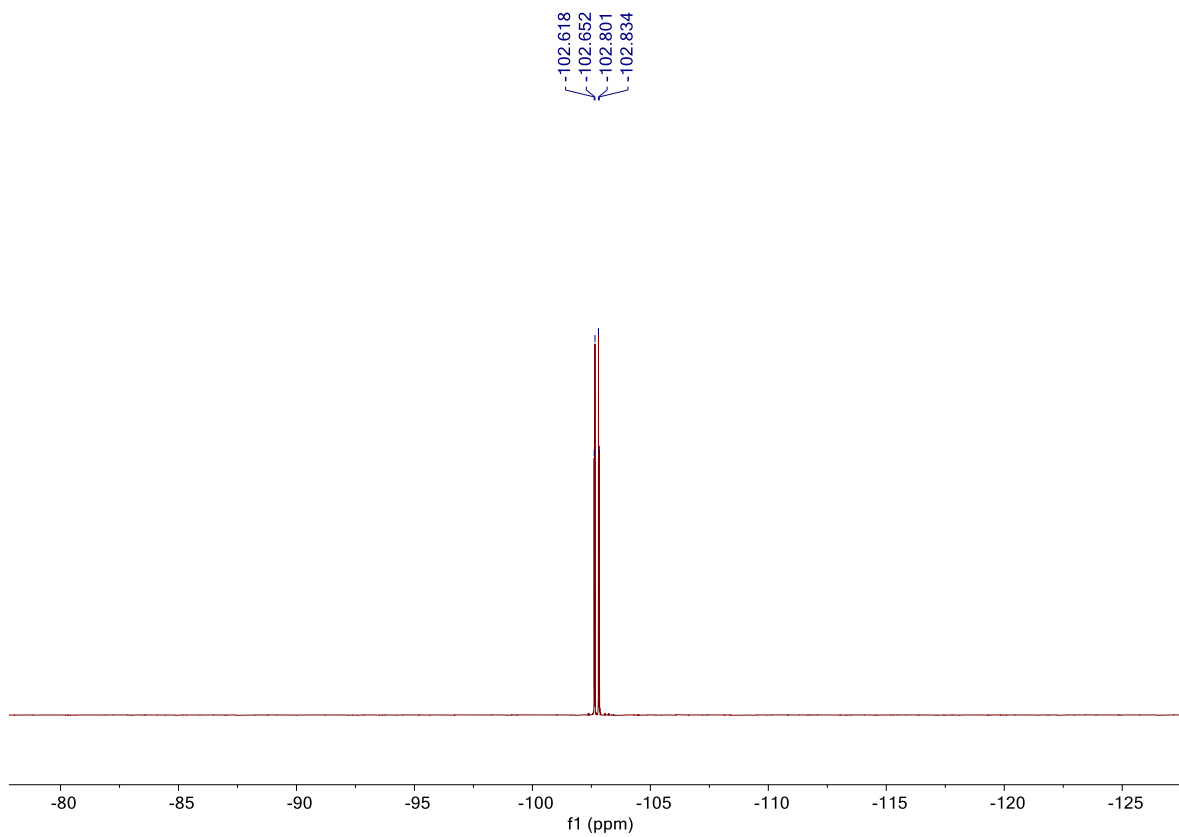

NMR Spectra of **4m**

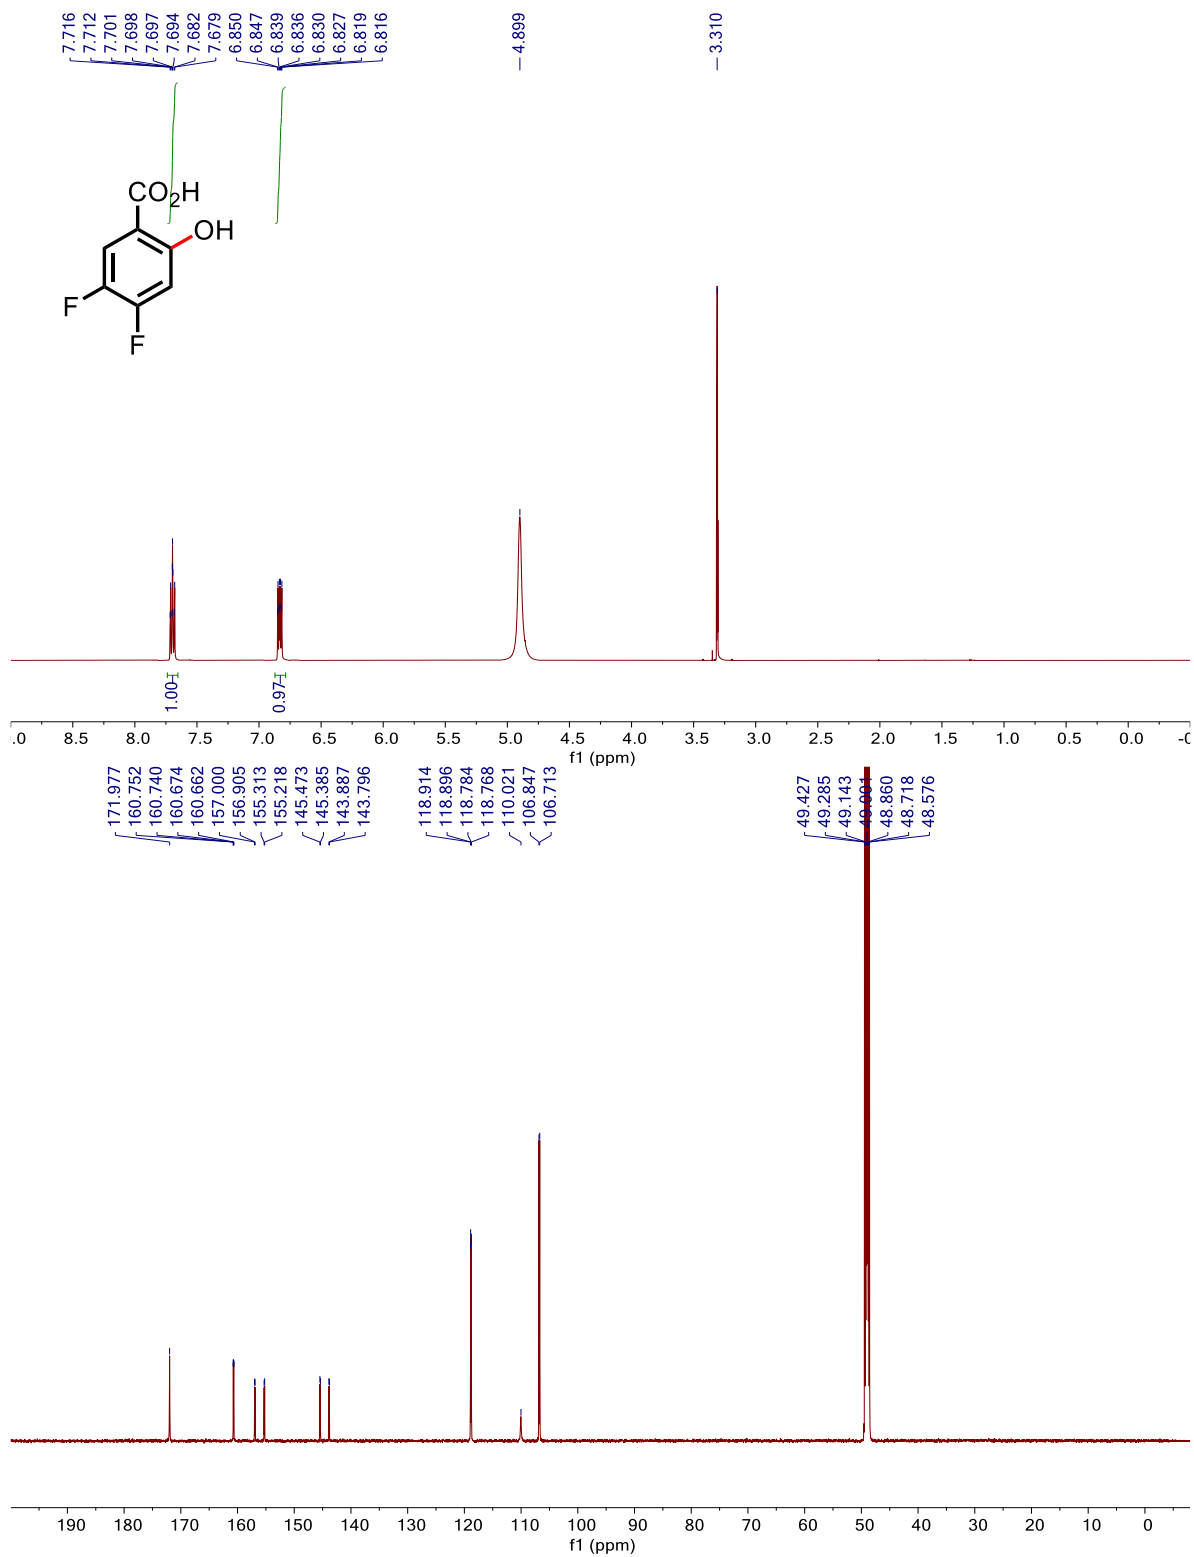

NMR Spectra of **4n**

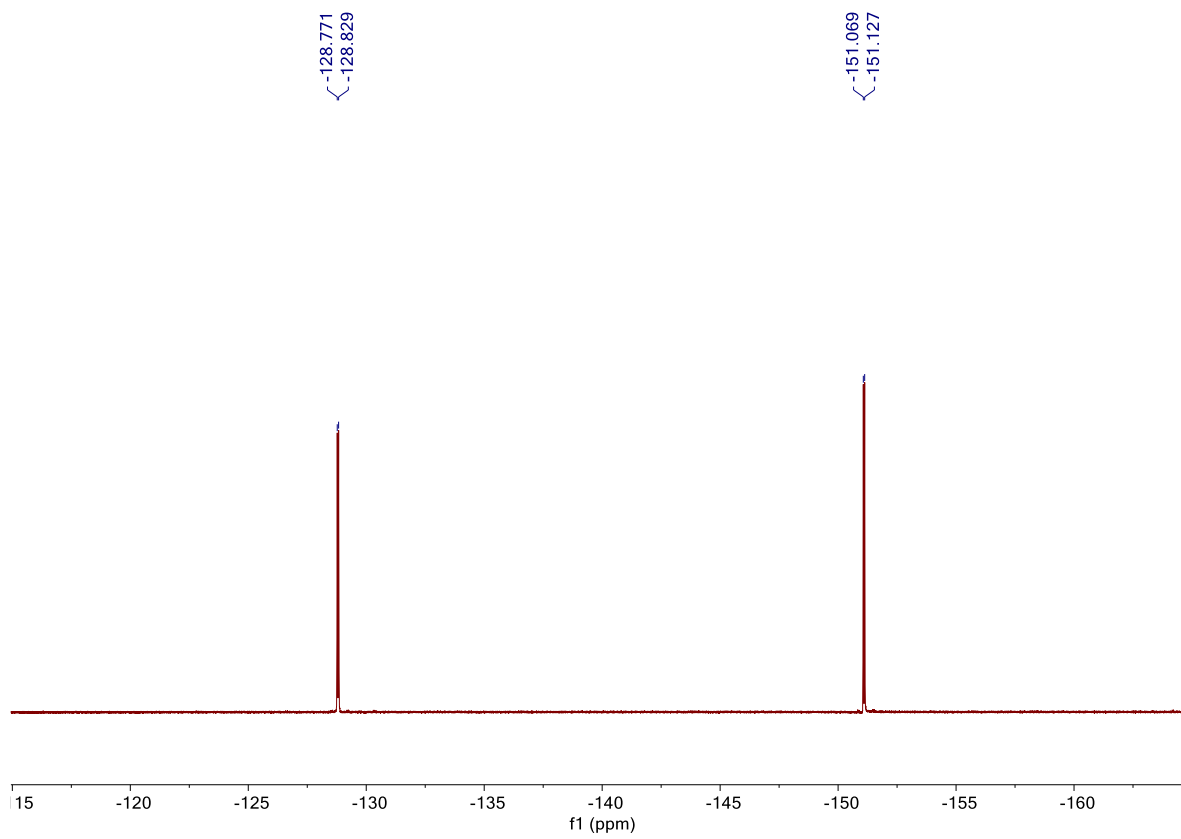

NMR Spectra of **4n**

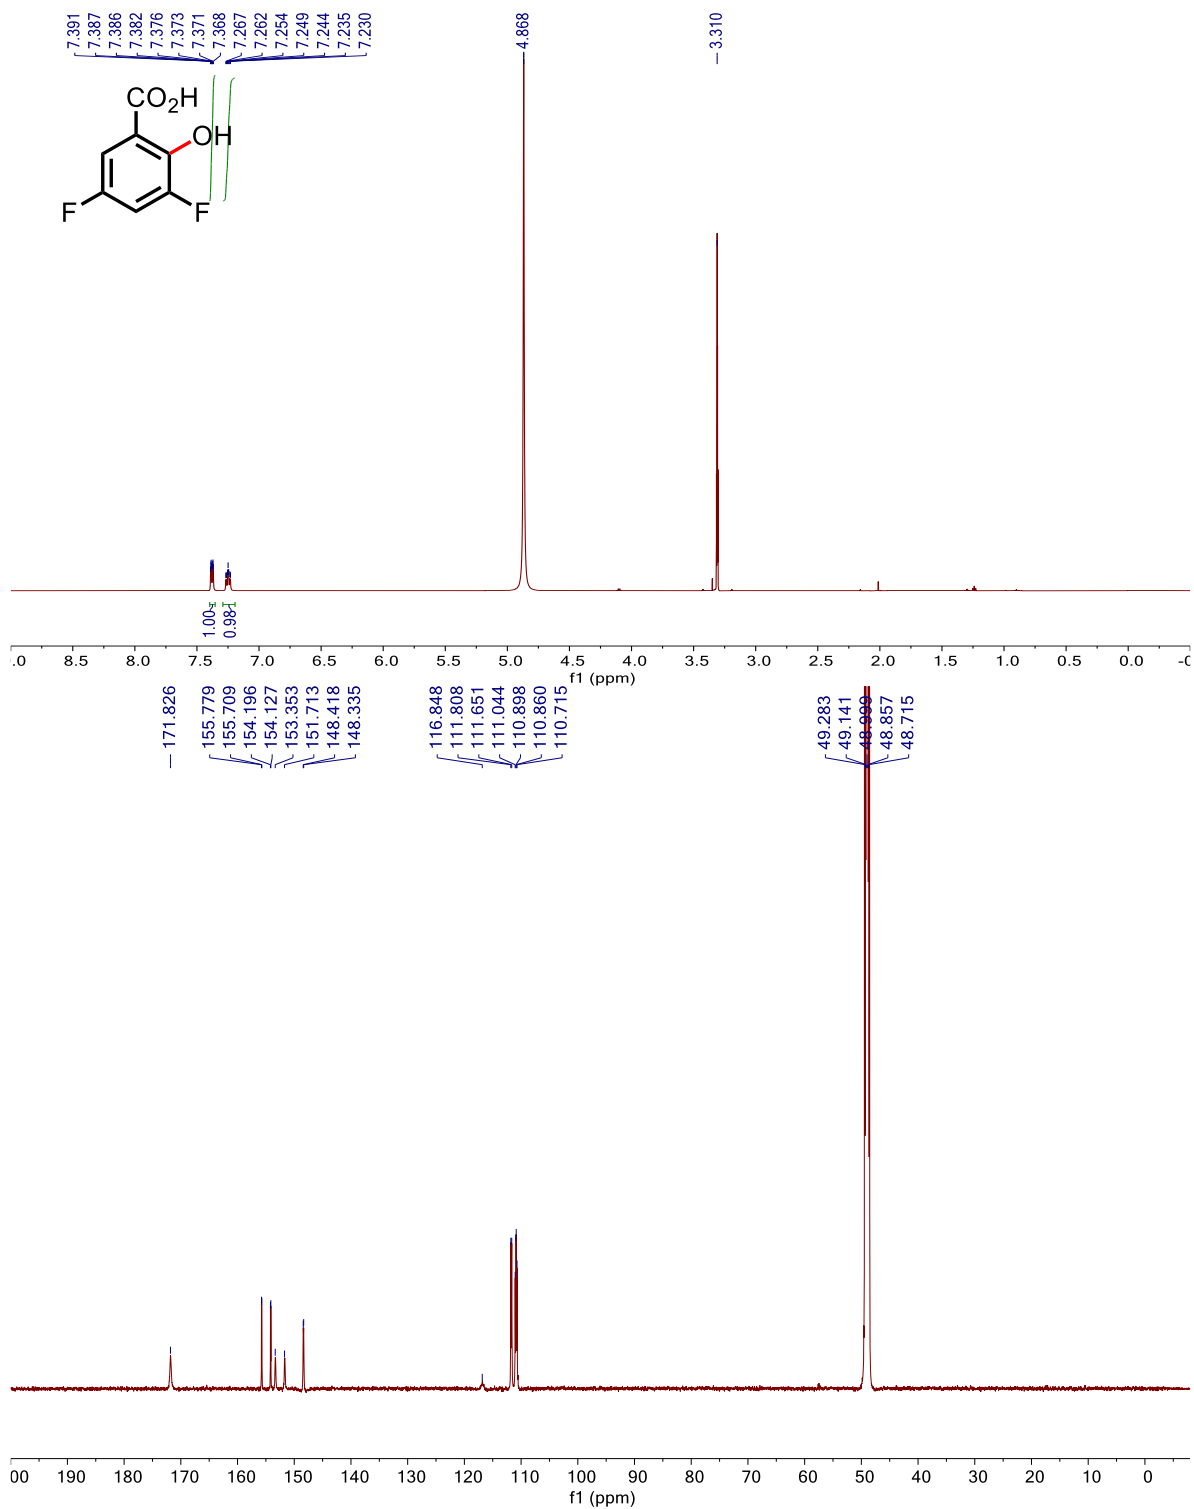

NMR Spectra of **4o**

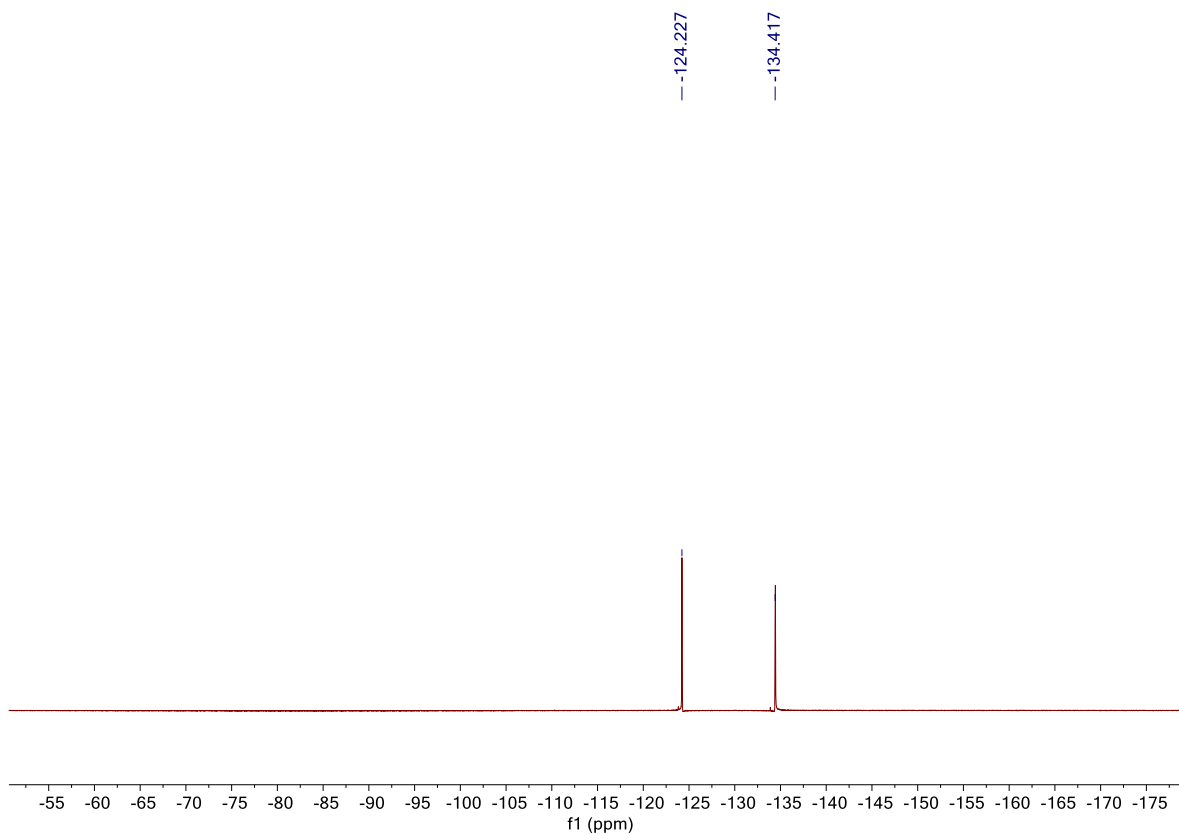

NMR Spectra of **4o**

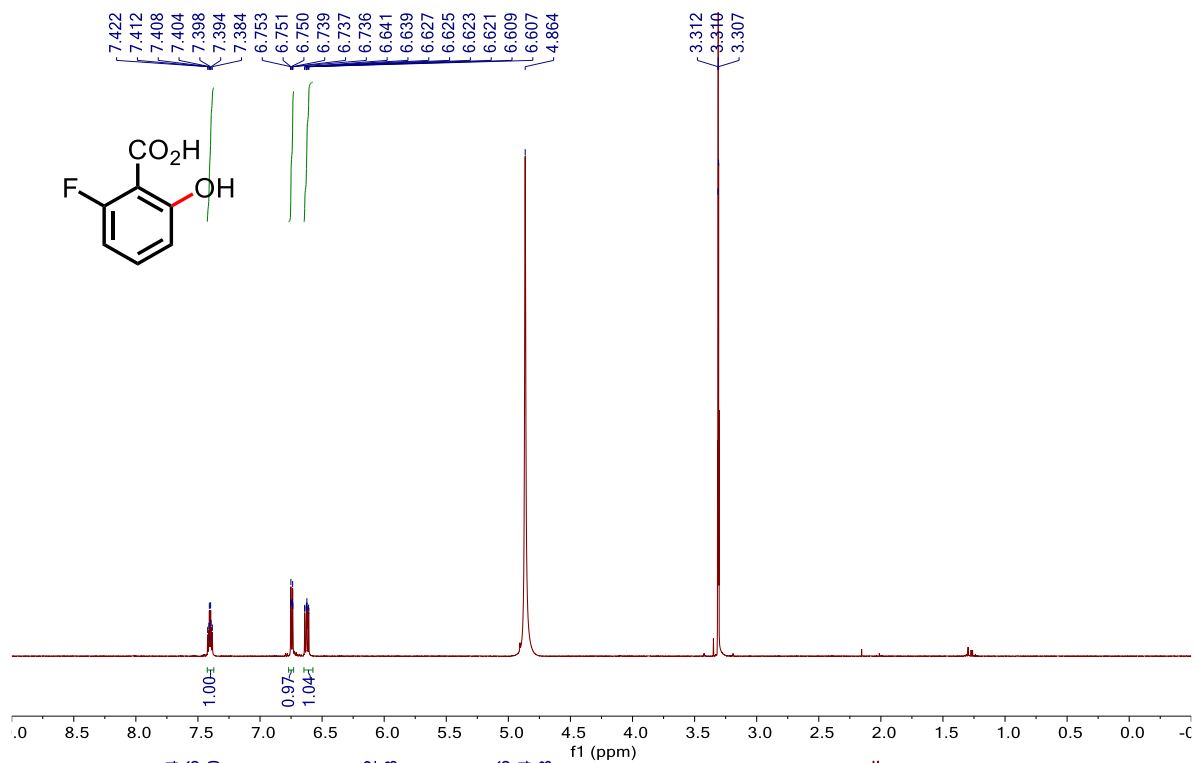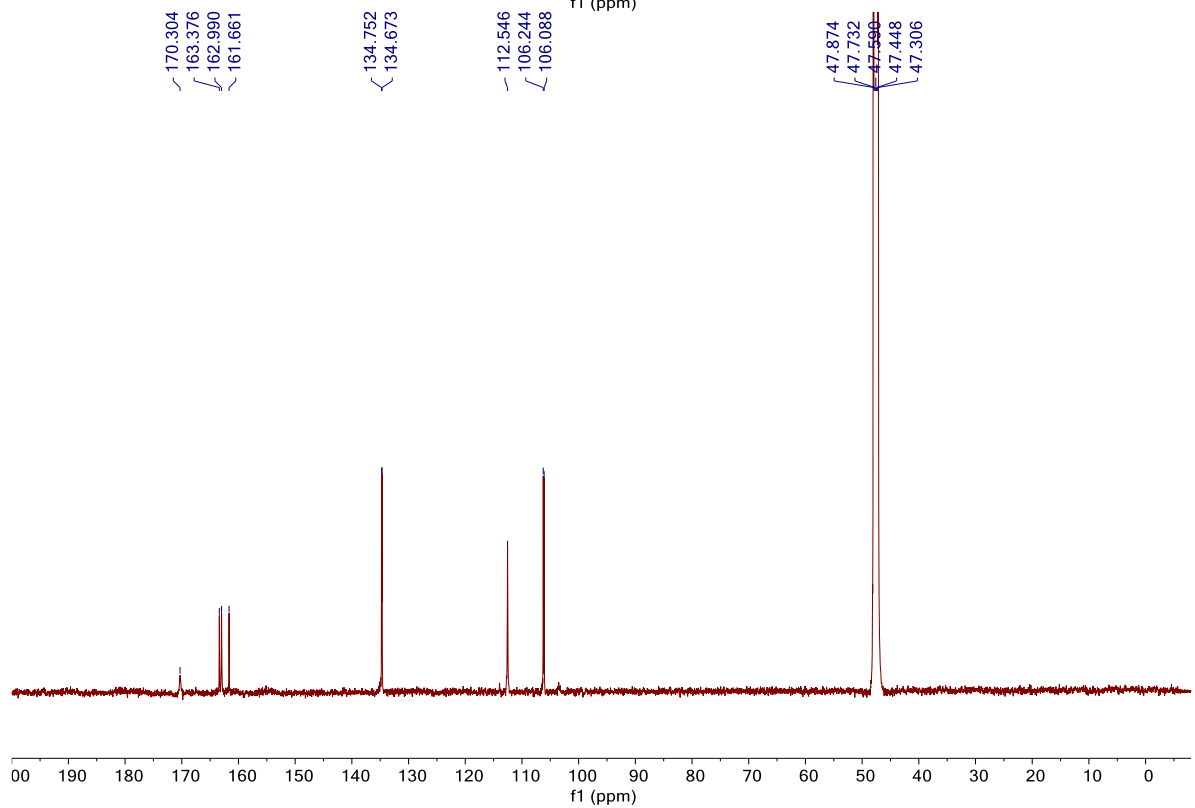

NMR Spectra of **4p**

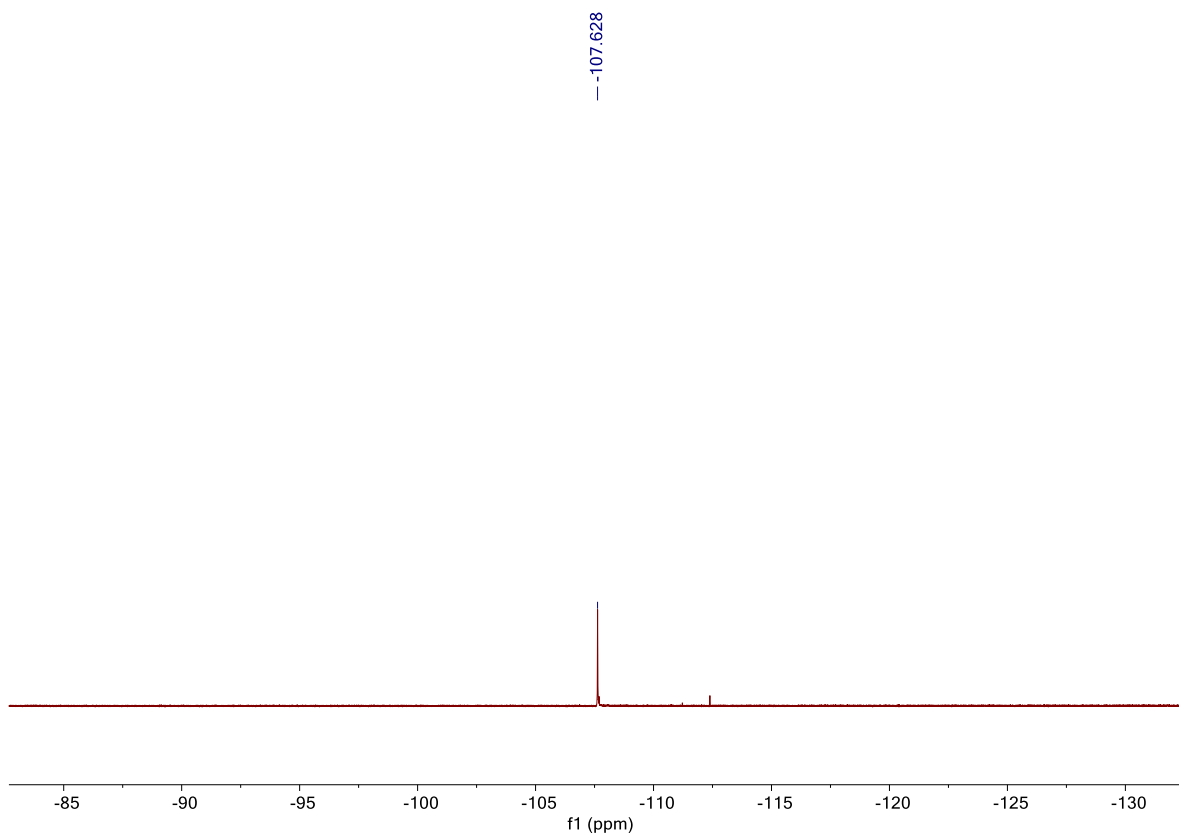

NMR Spectra of **4p**

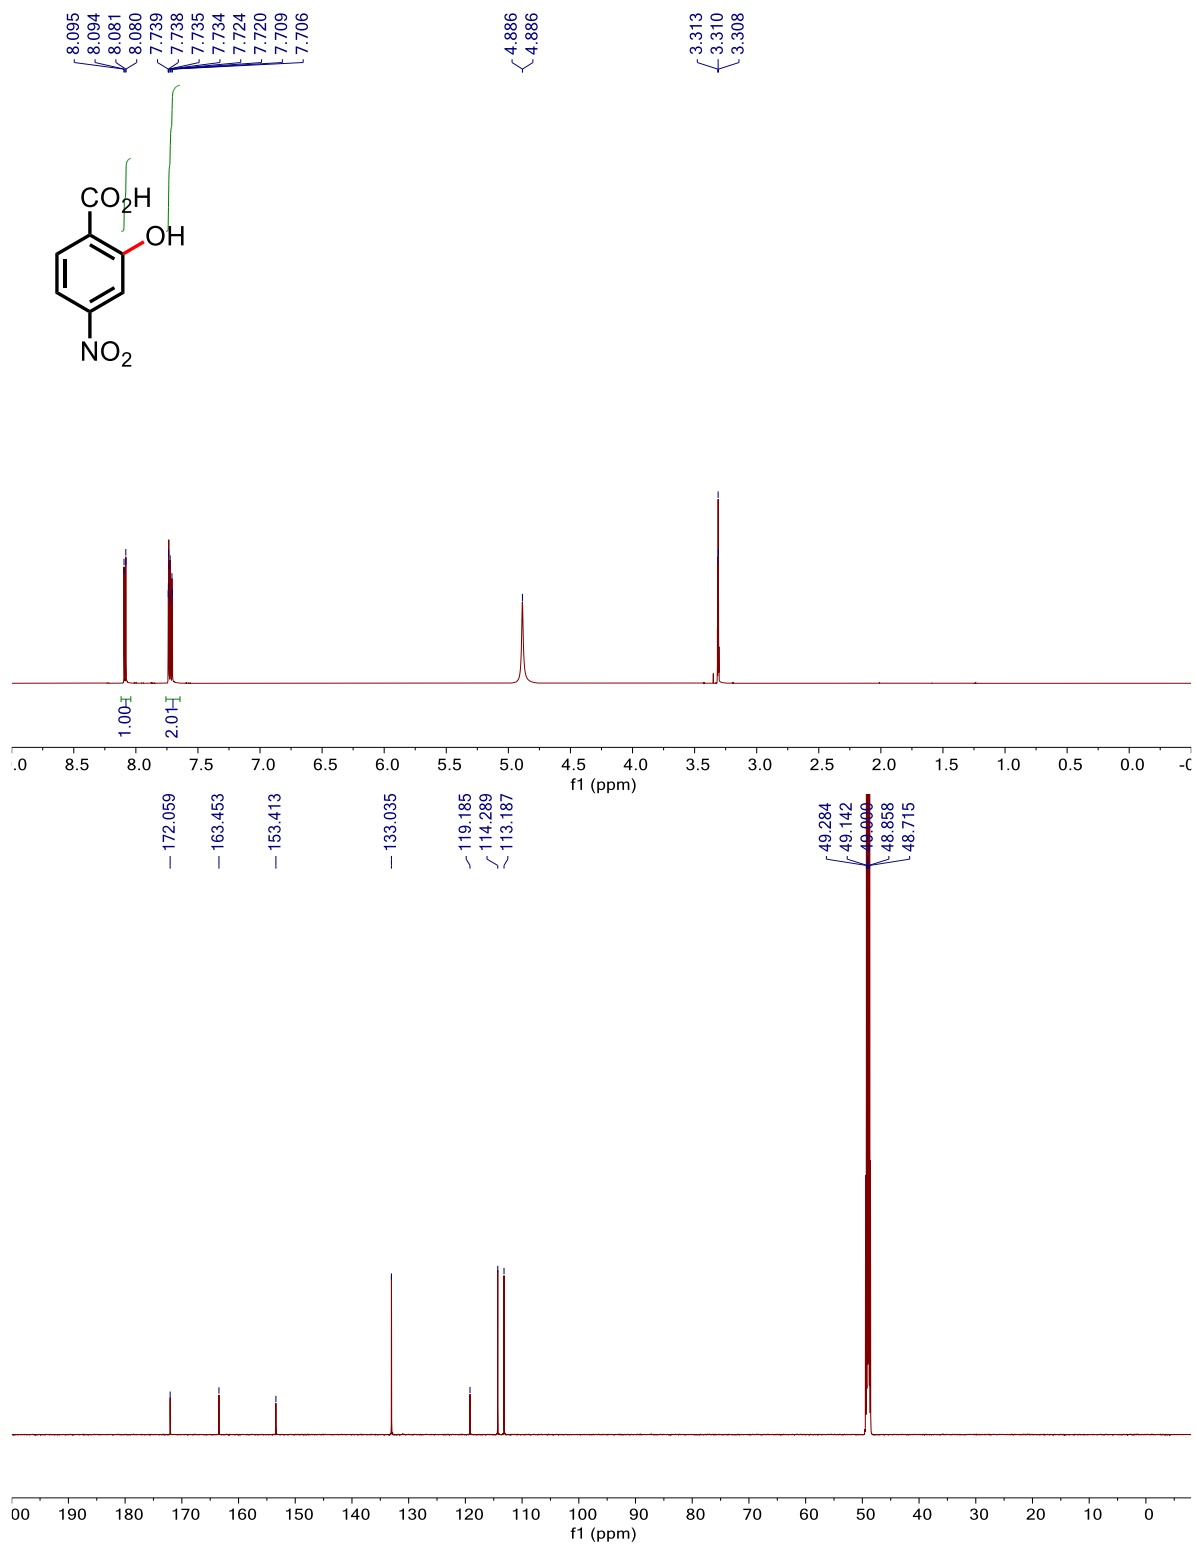

NMR Spectra of 4q



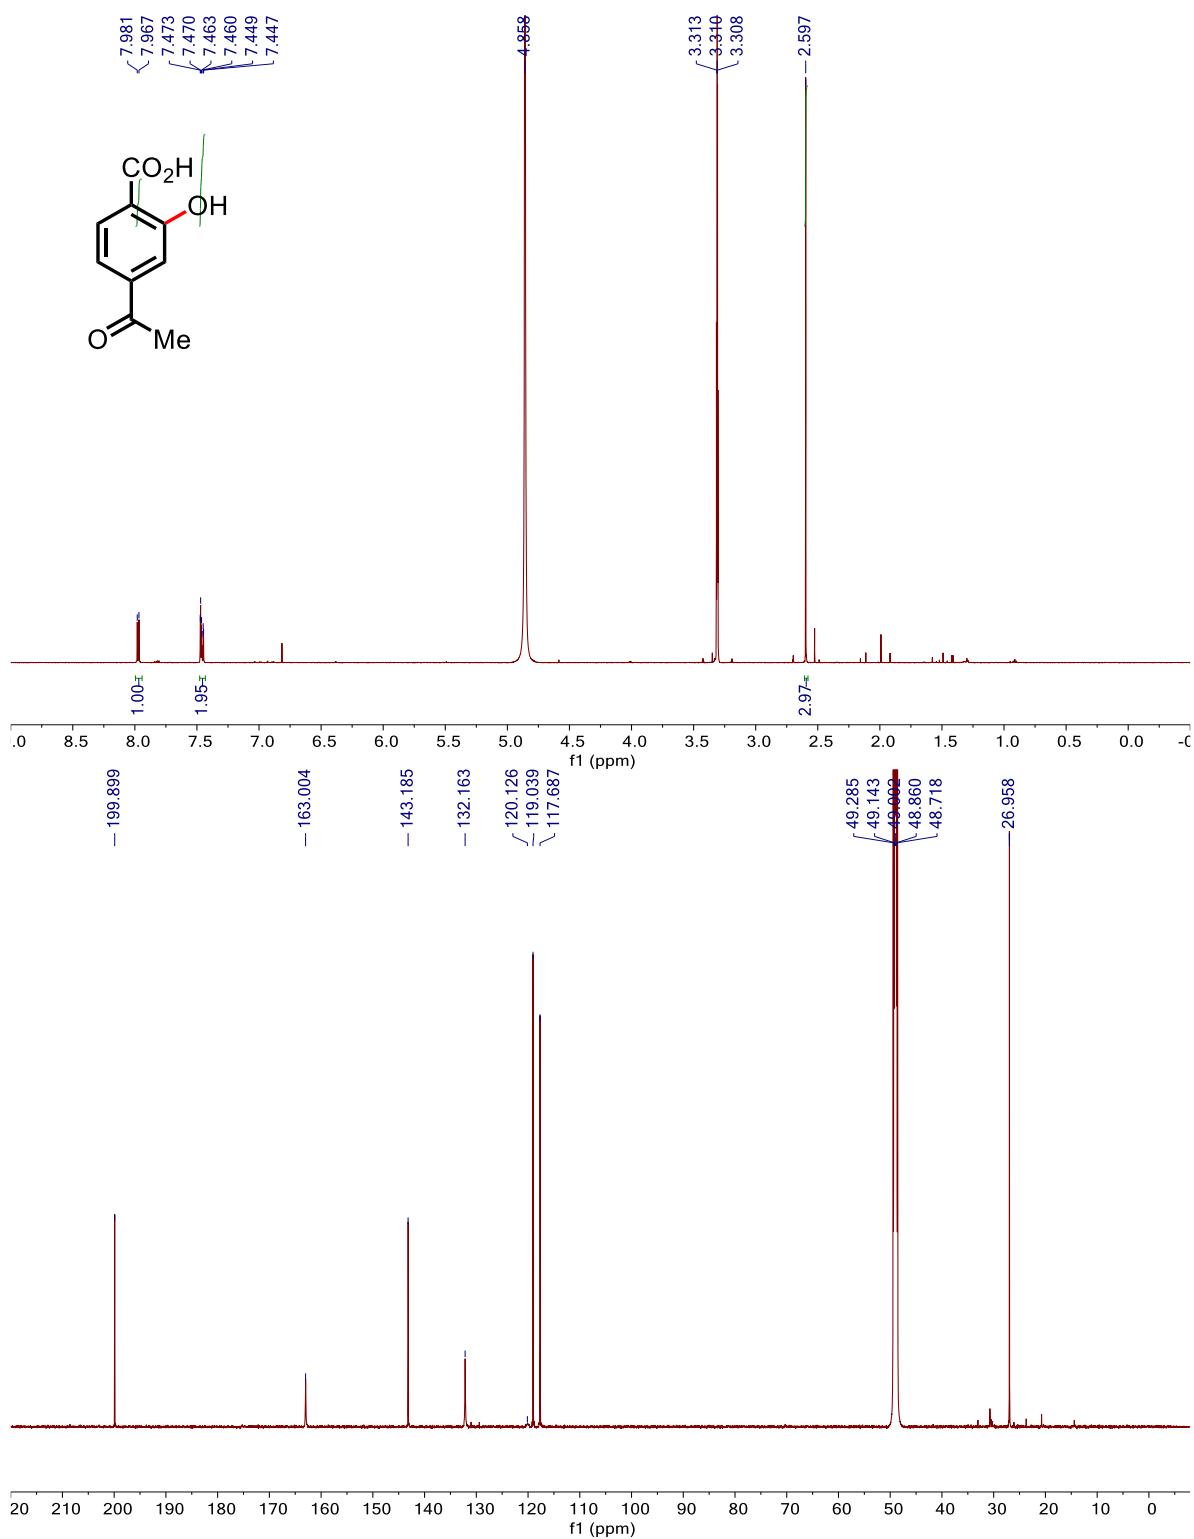

NMR Spectra of 4r

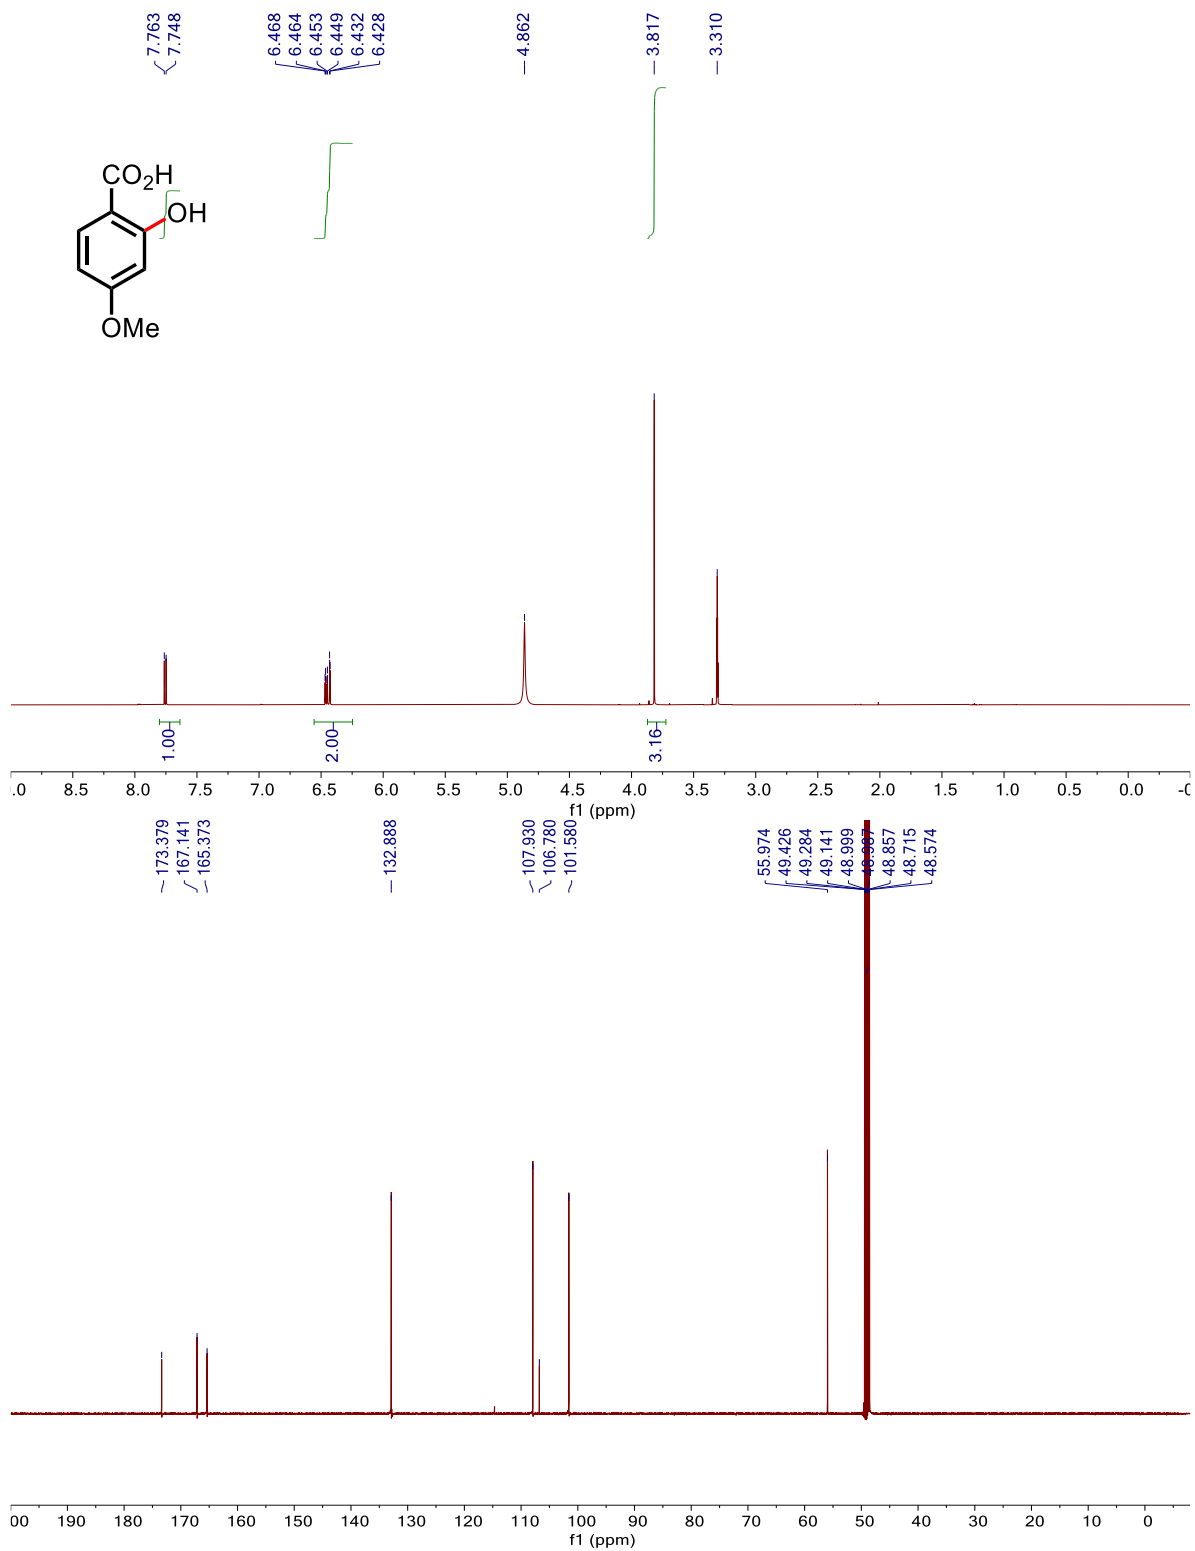

NMR Spectra of 4s

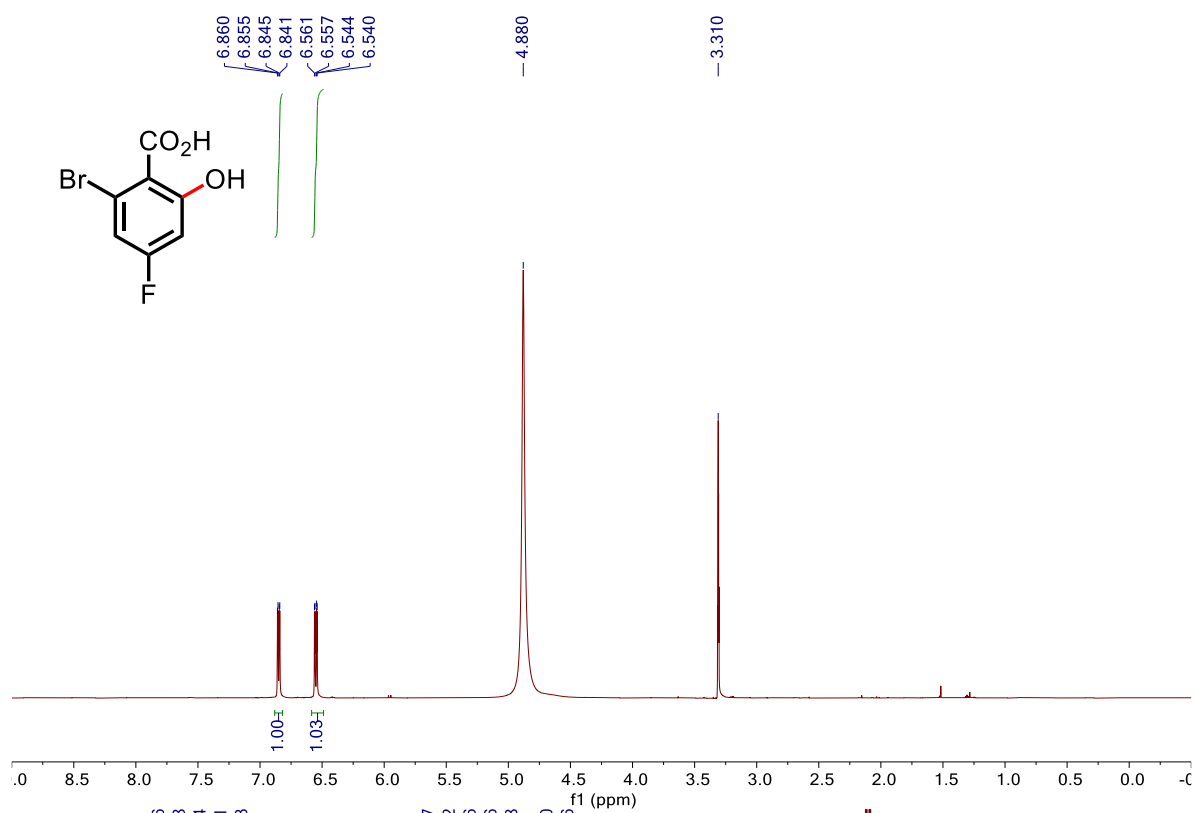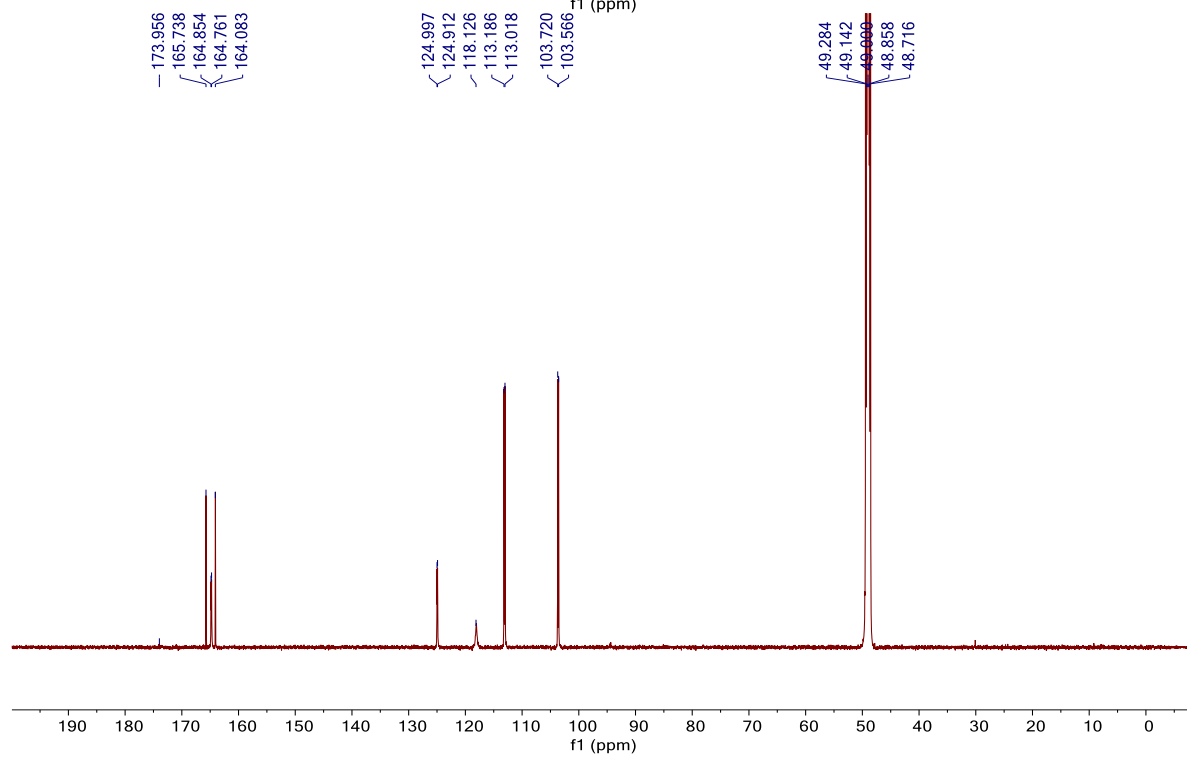

NMR Spectra of 4t

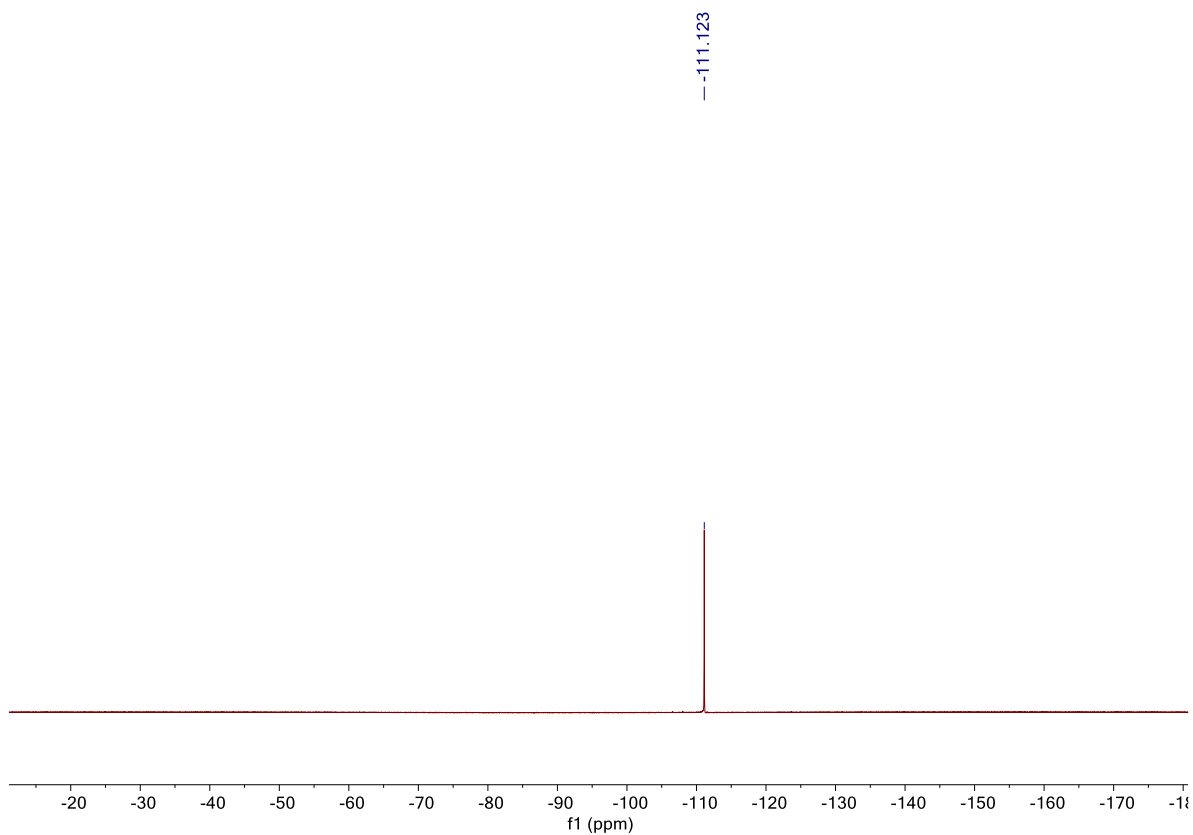

NMR Spectra of **4t**

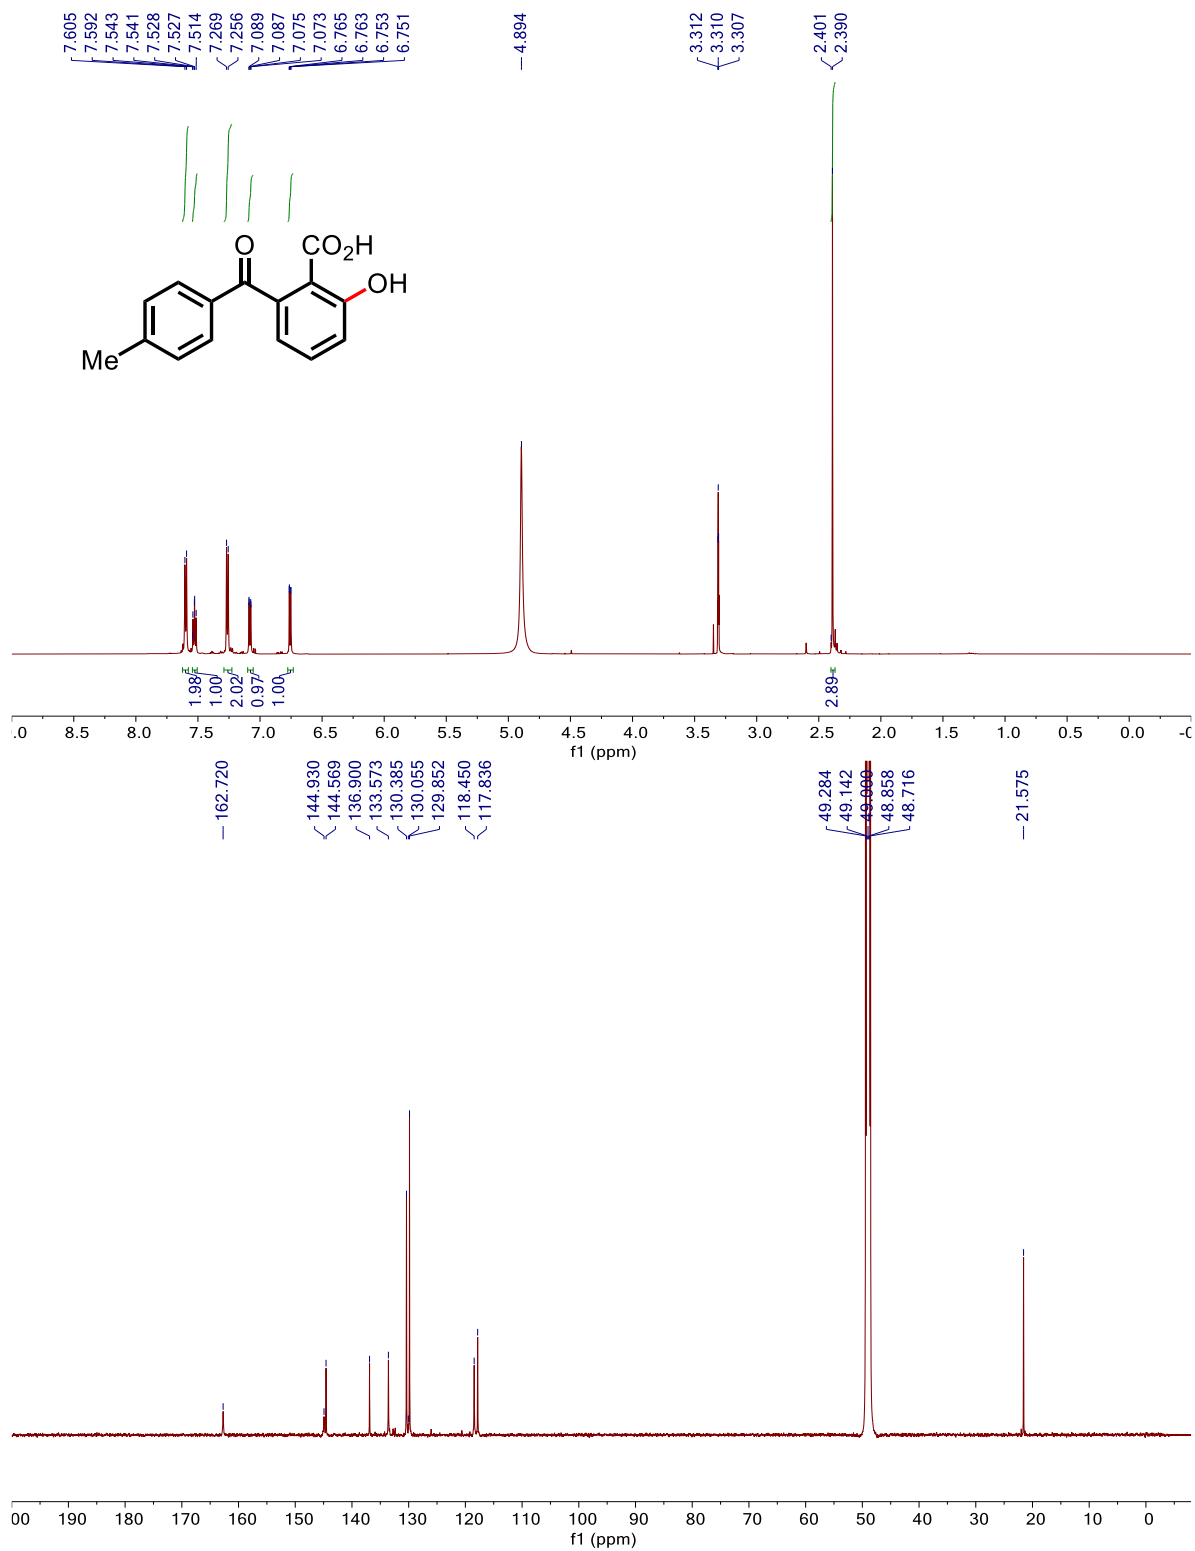

NMR Spectra of **4u**

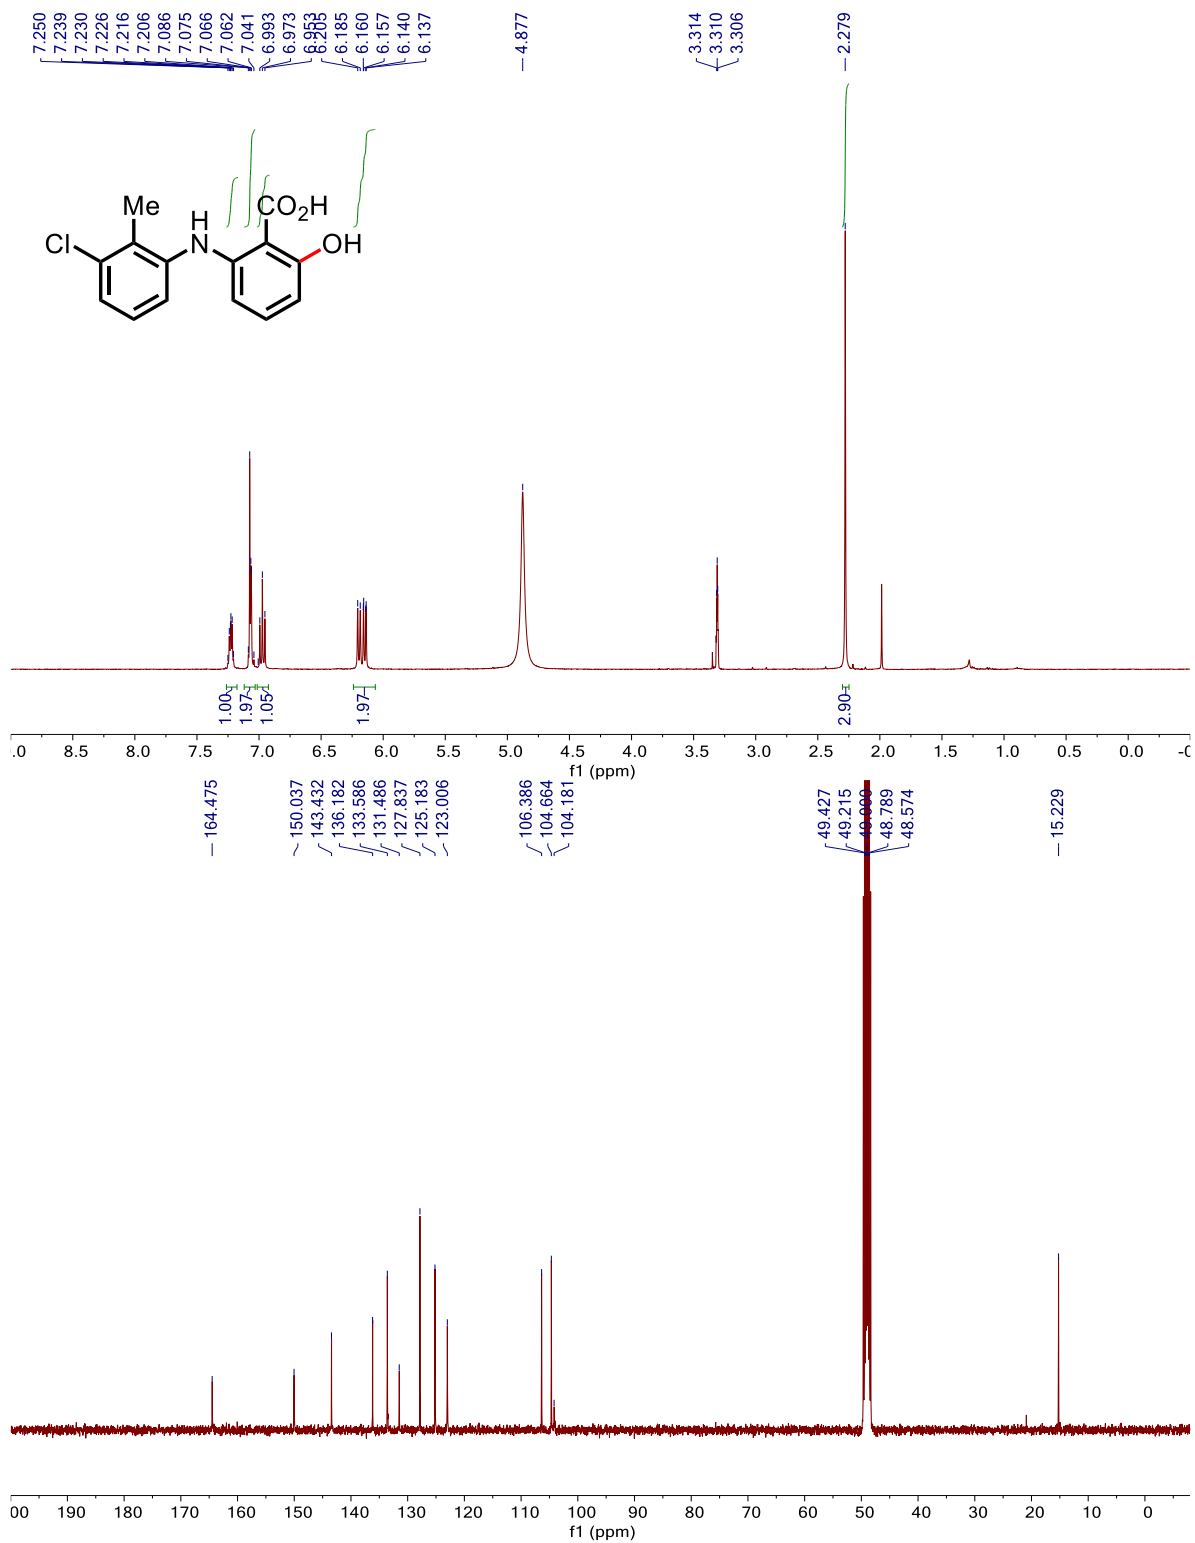

NMR Spectra of 4v

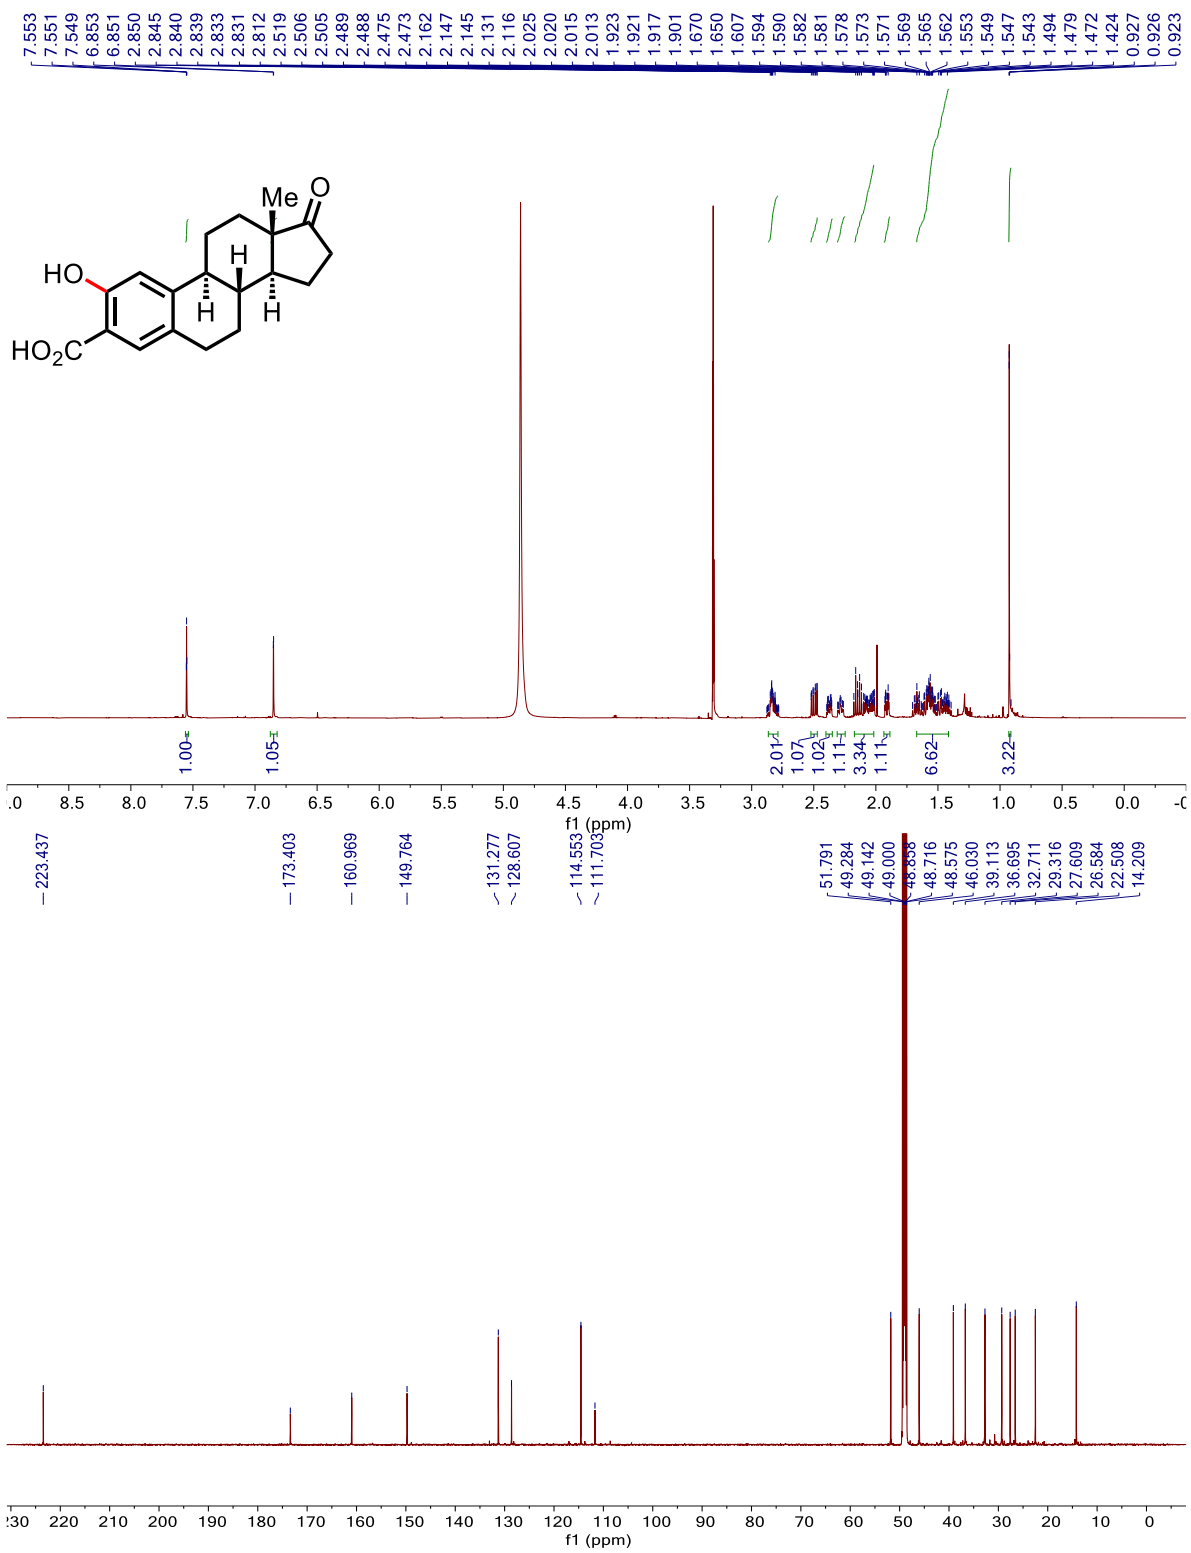

NMR Spectra of 4w

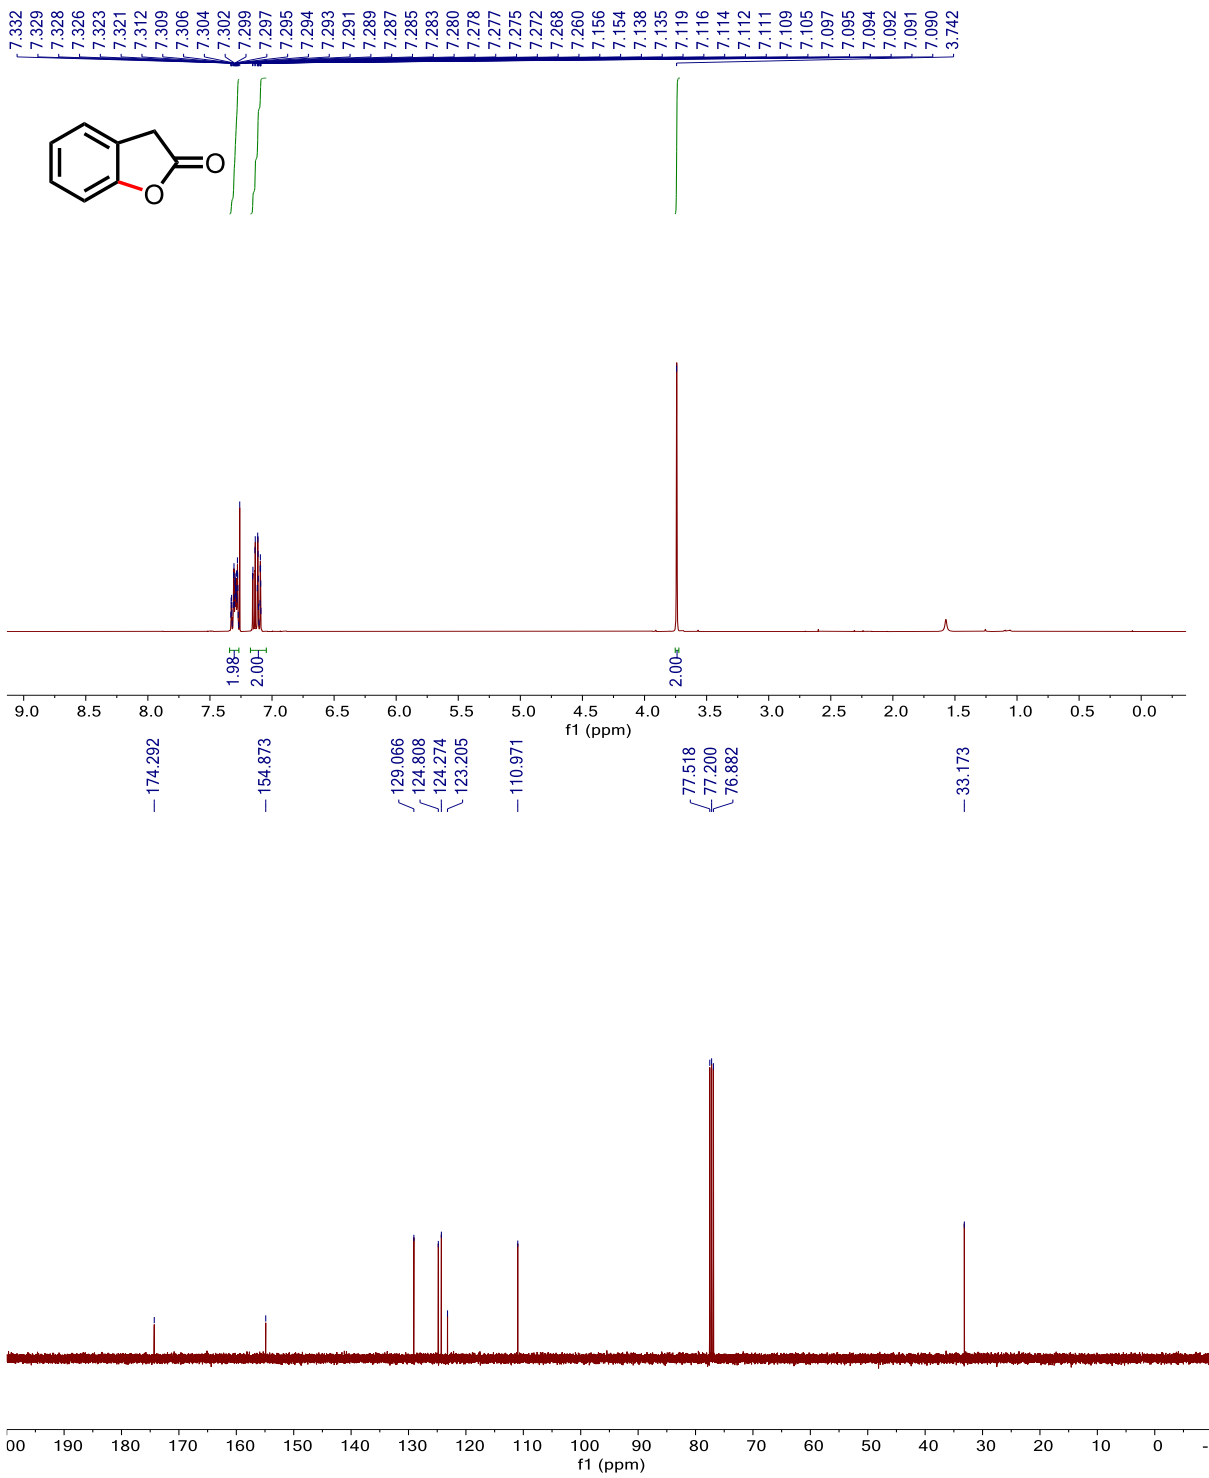

NMR Spectra of **5a**



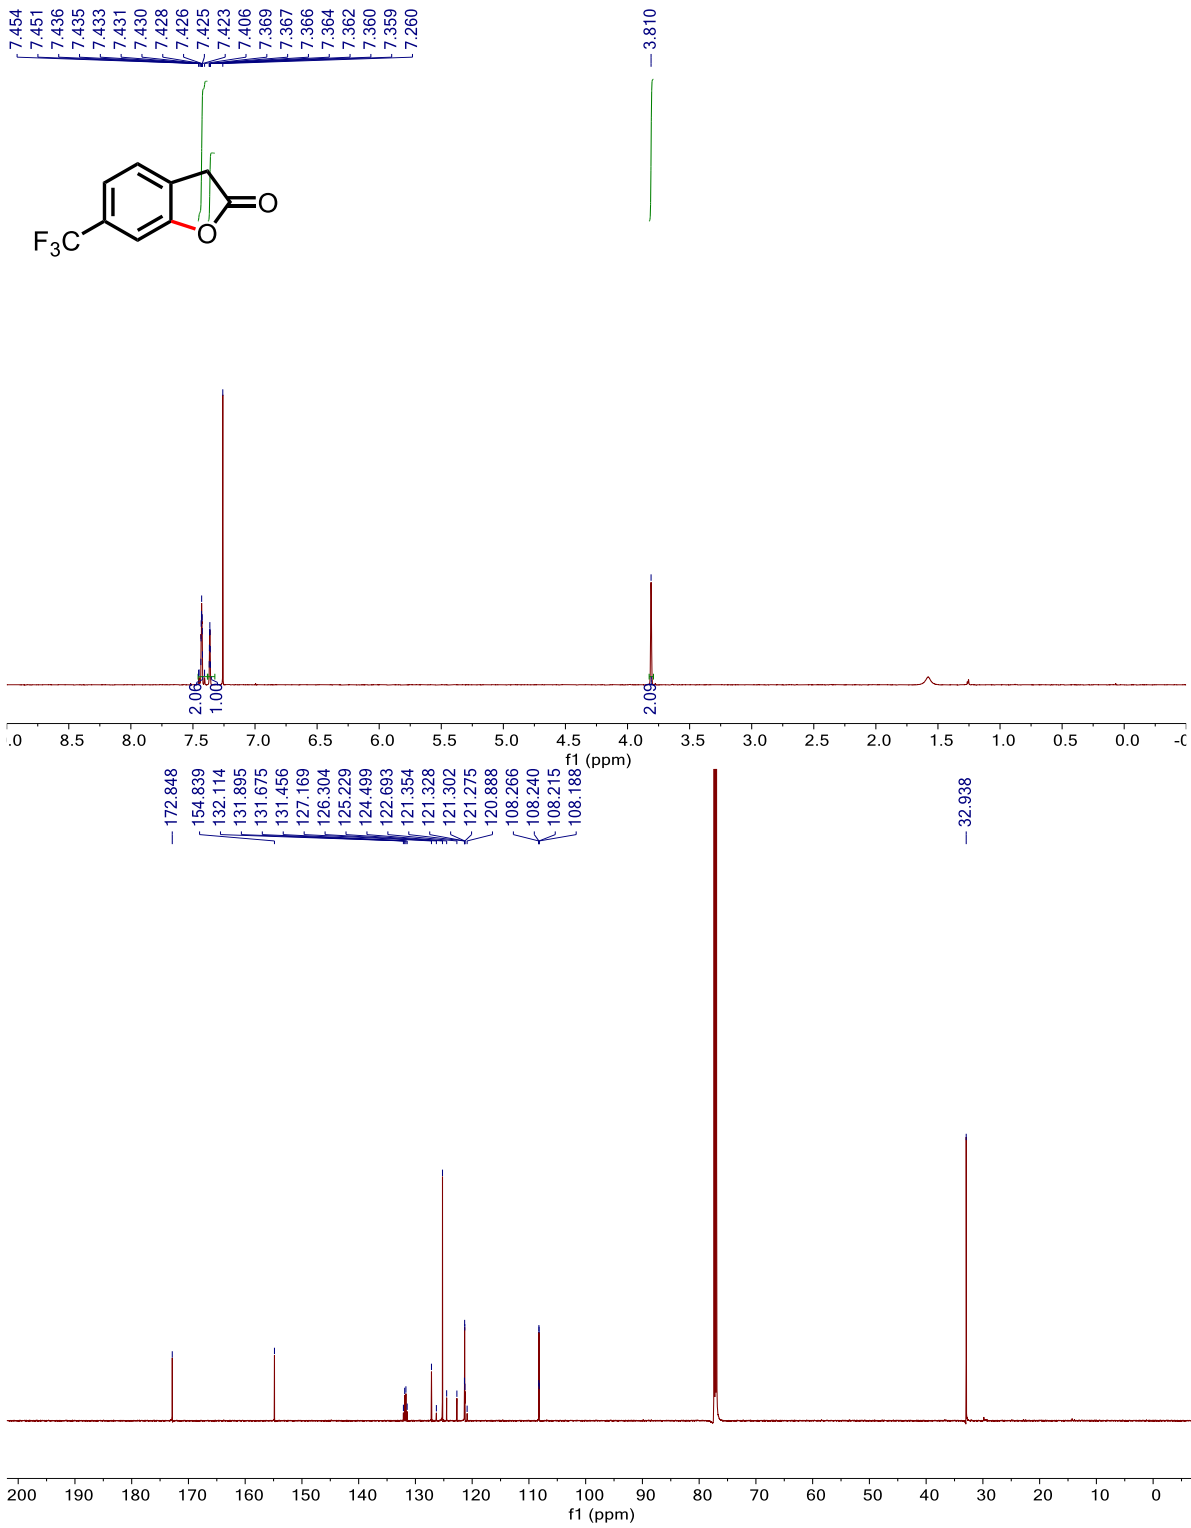

NMR Spectra of **5b**

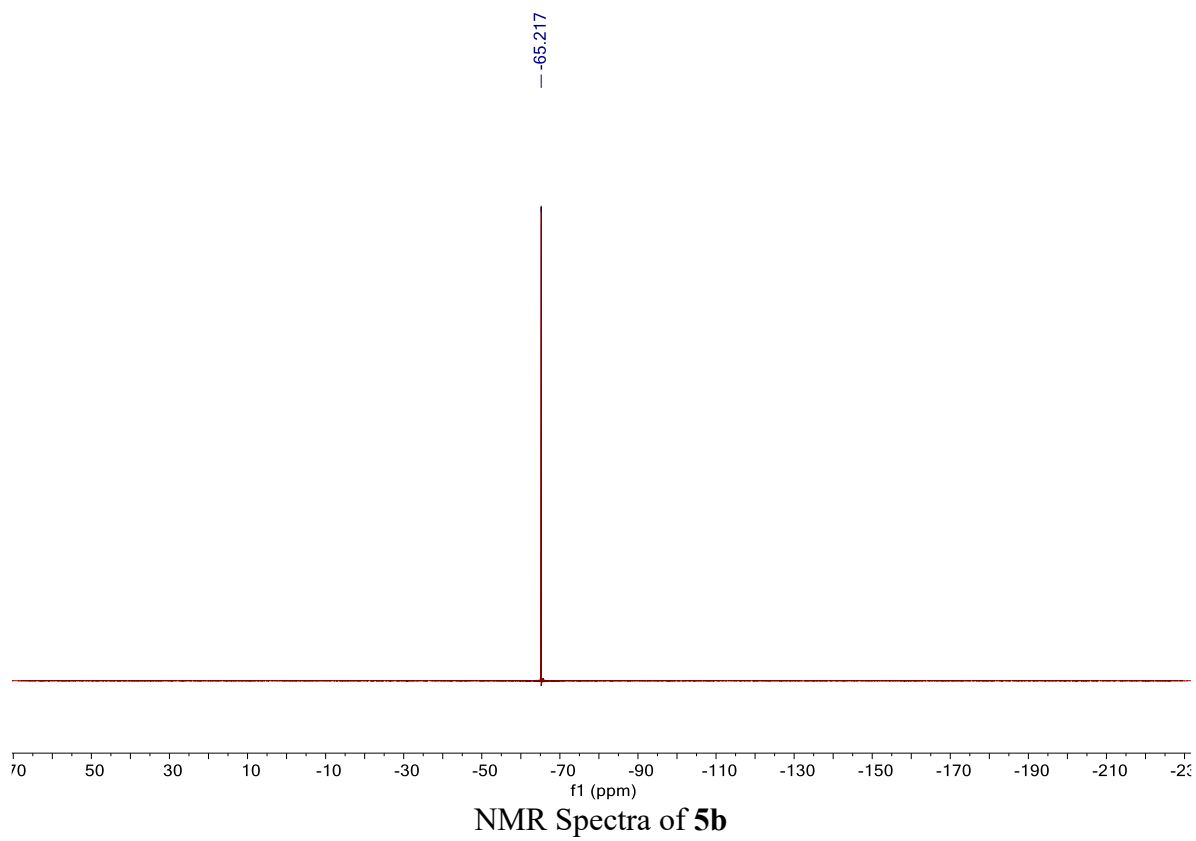

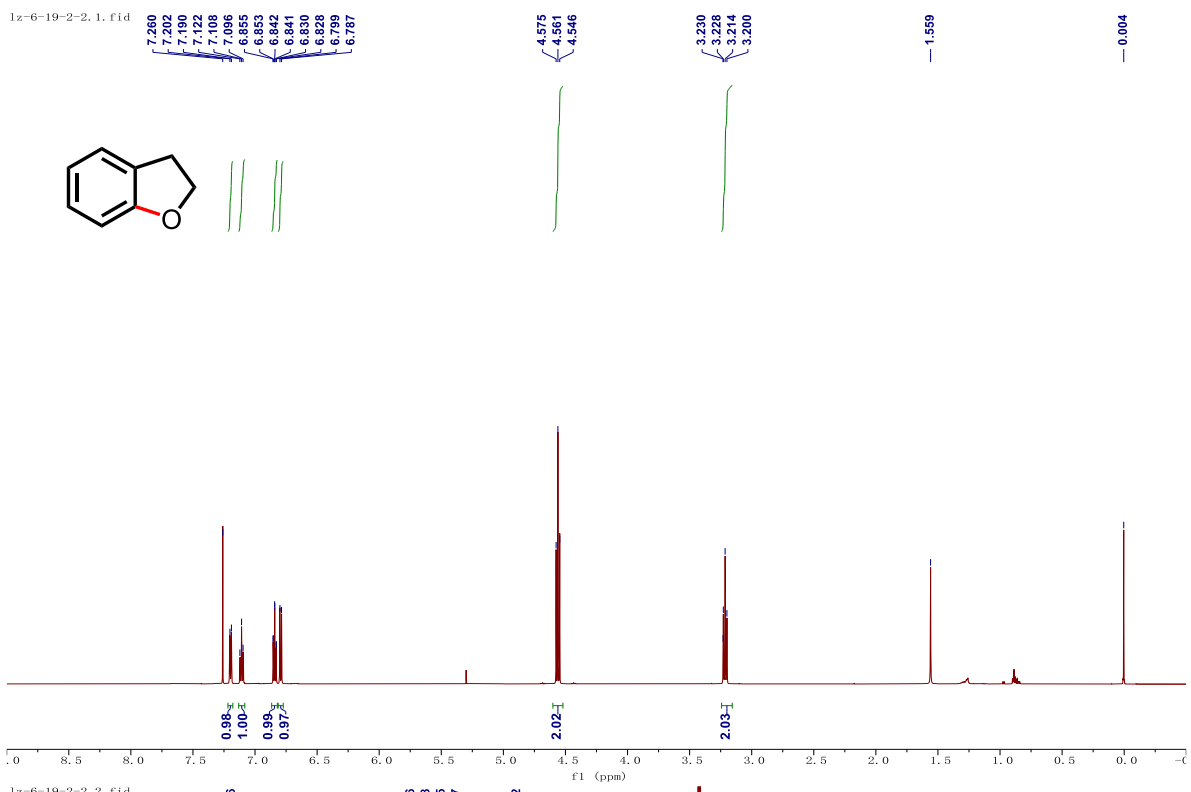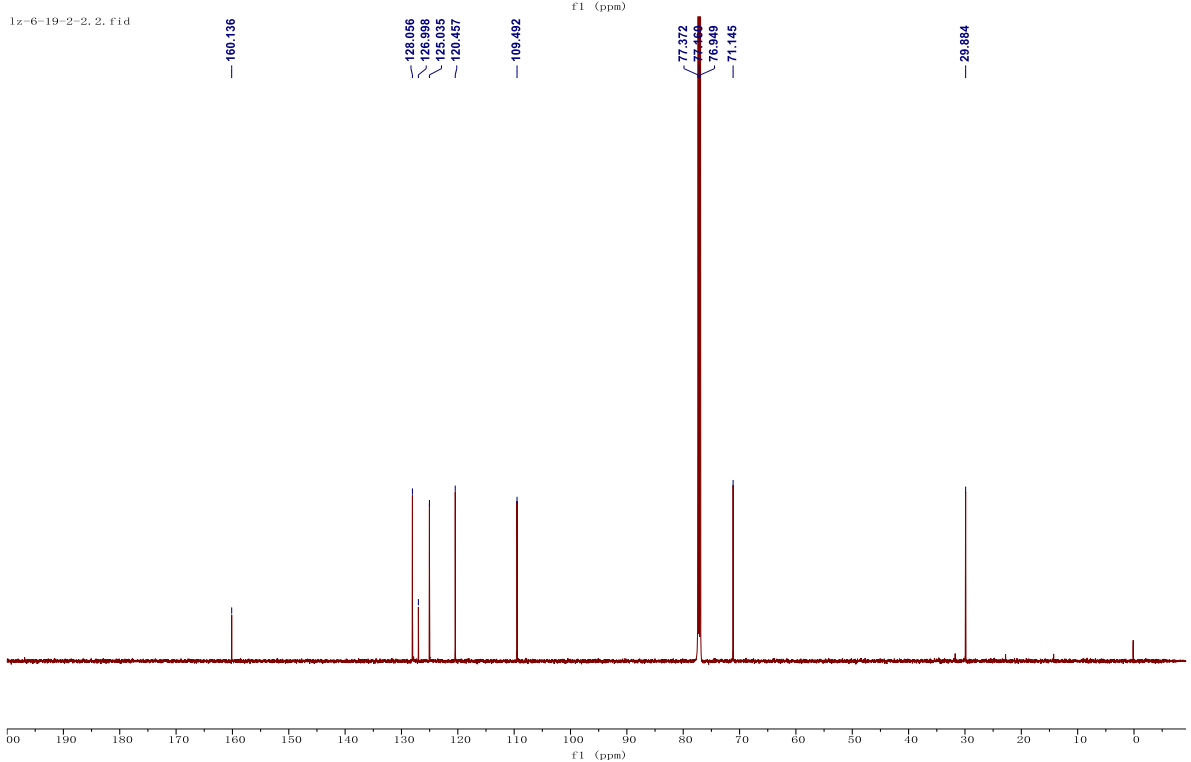

NMR Spectra of 5c

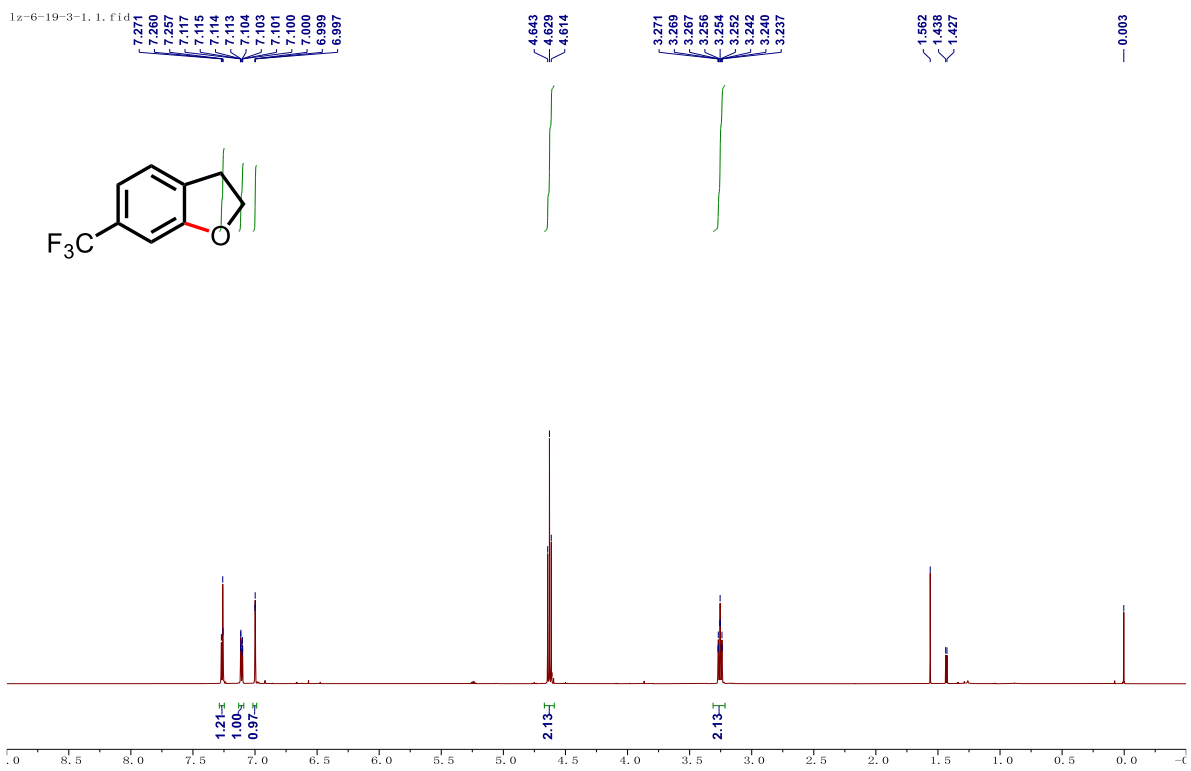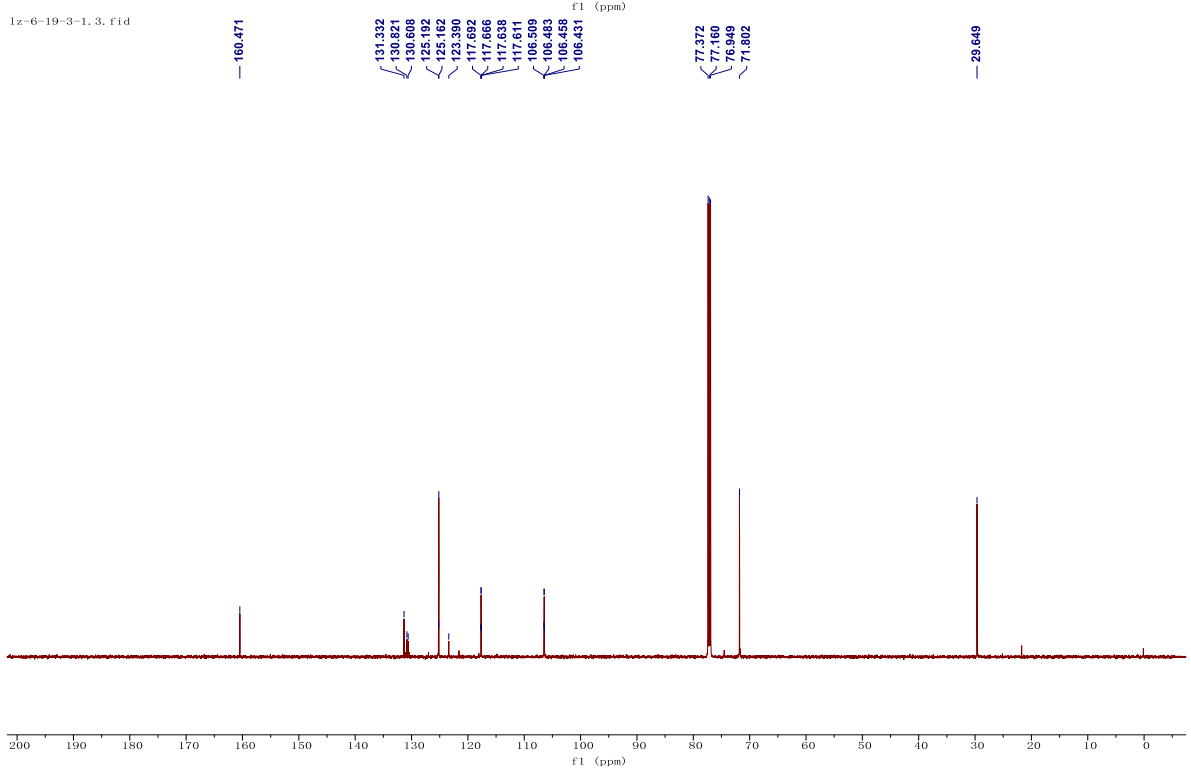

NMR Spectra of **5d**

lz-6-19-3-f. 2. fid

— 64.910

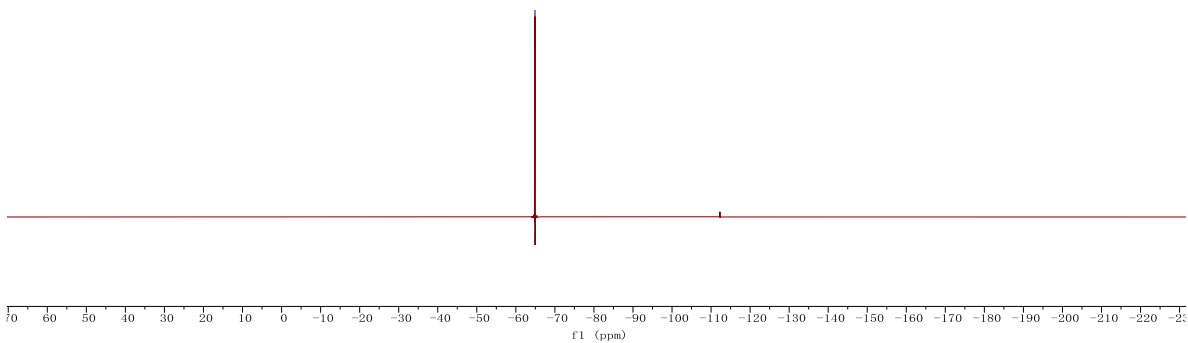

NMR Spectra of **5d**

Lz-5-51-2.1.fid  
10.599

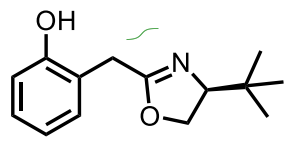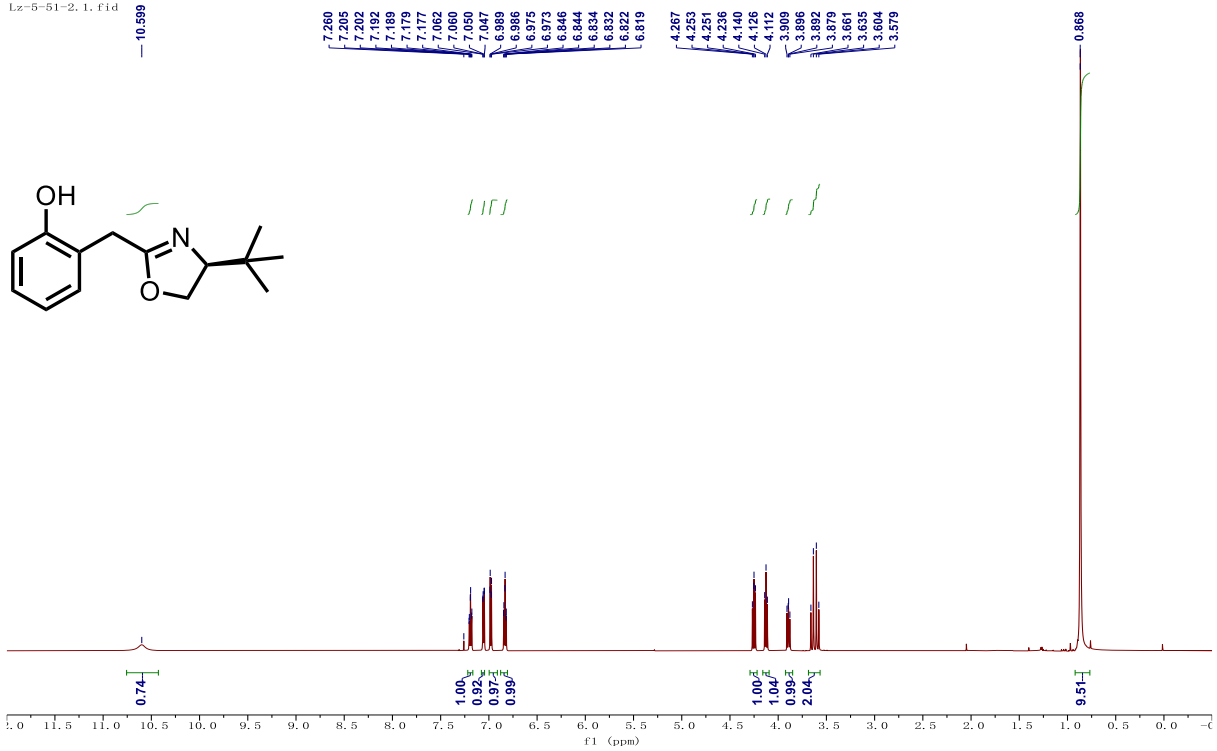

Lz-5-51-2.2.fid

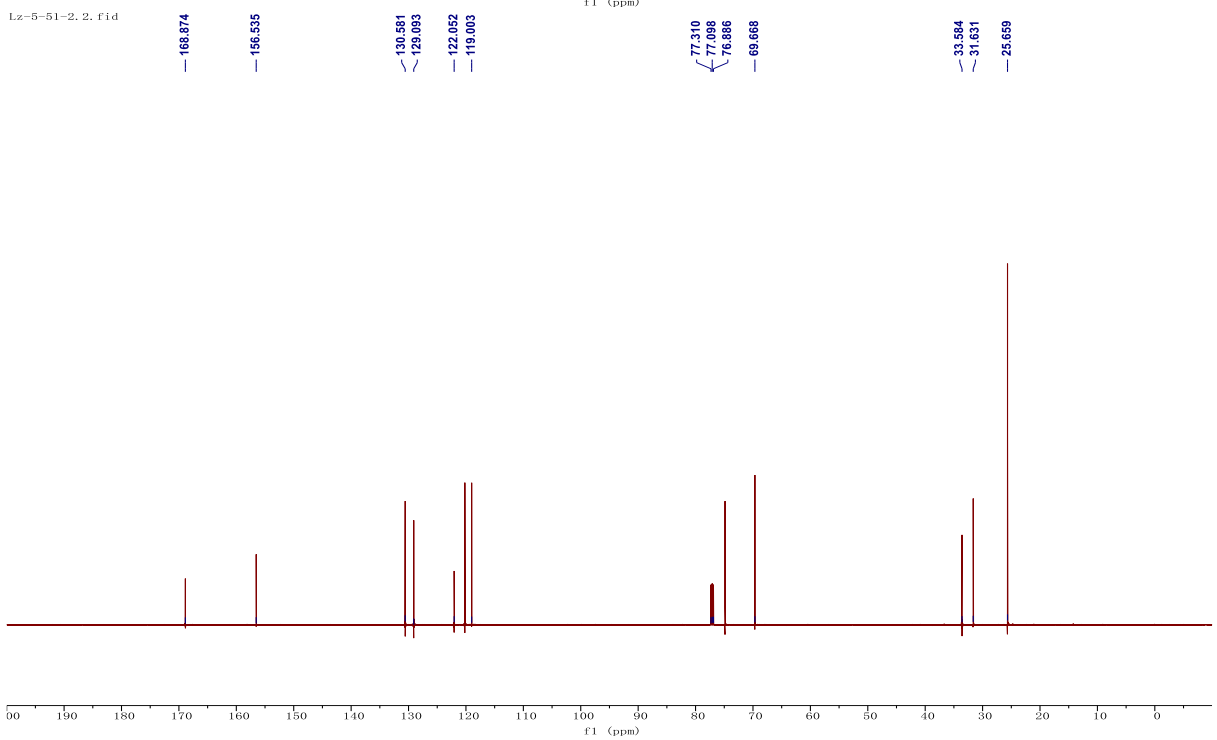

NMR Spectra of 5e

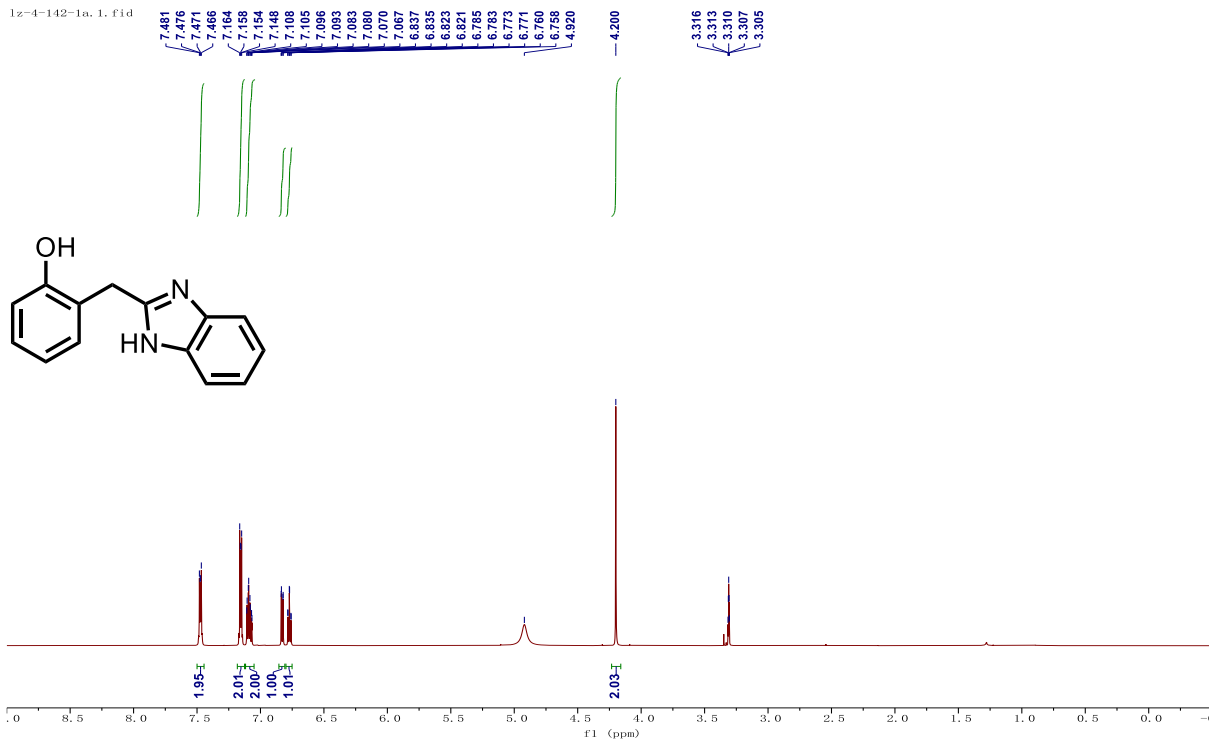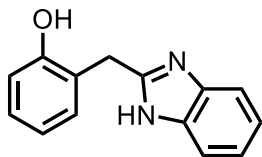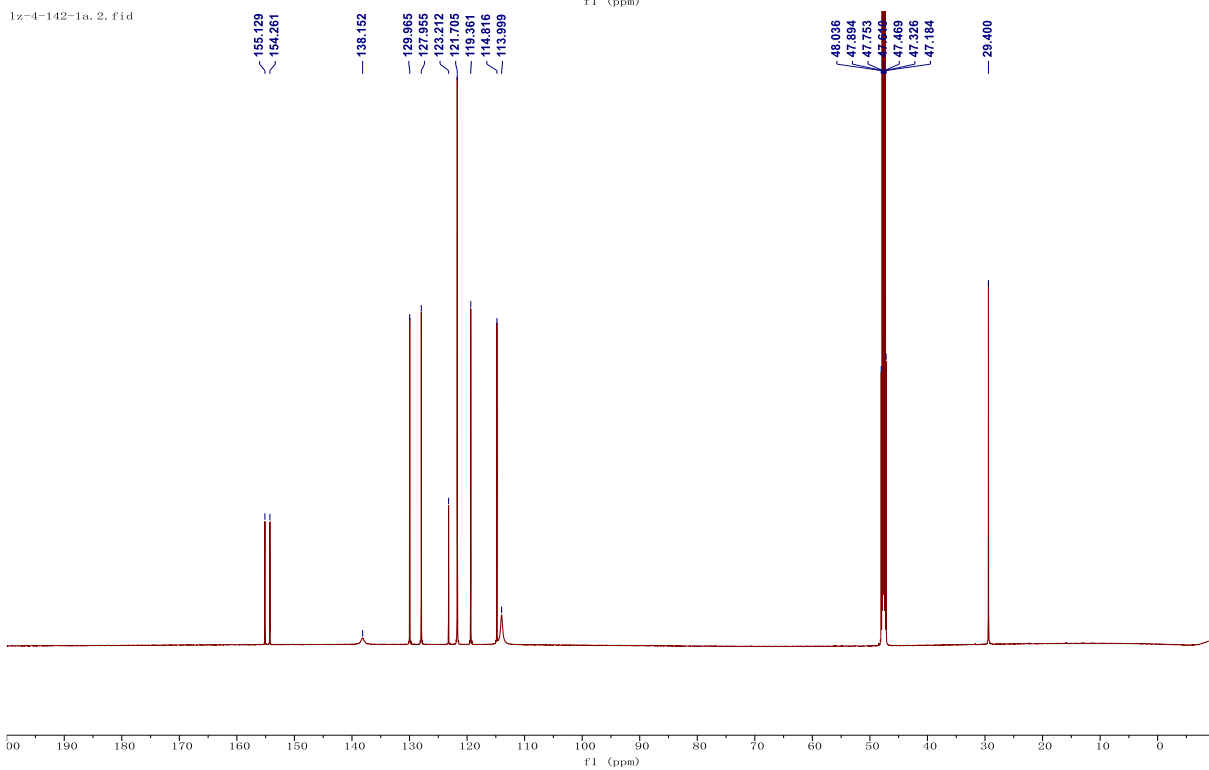

NMR Spectra of **5f**

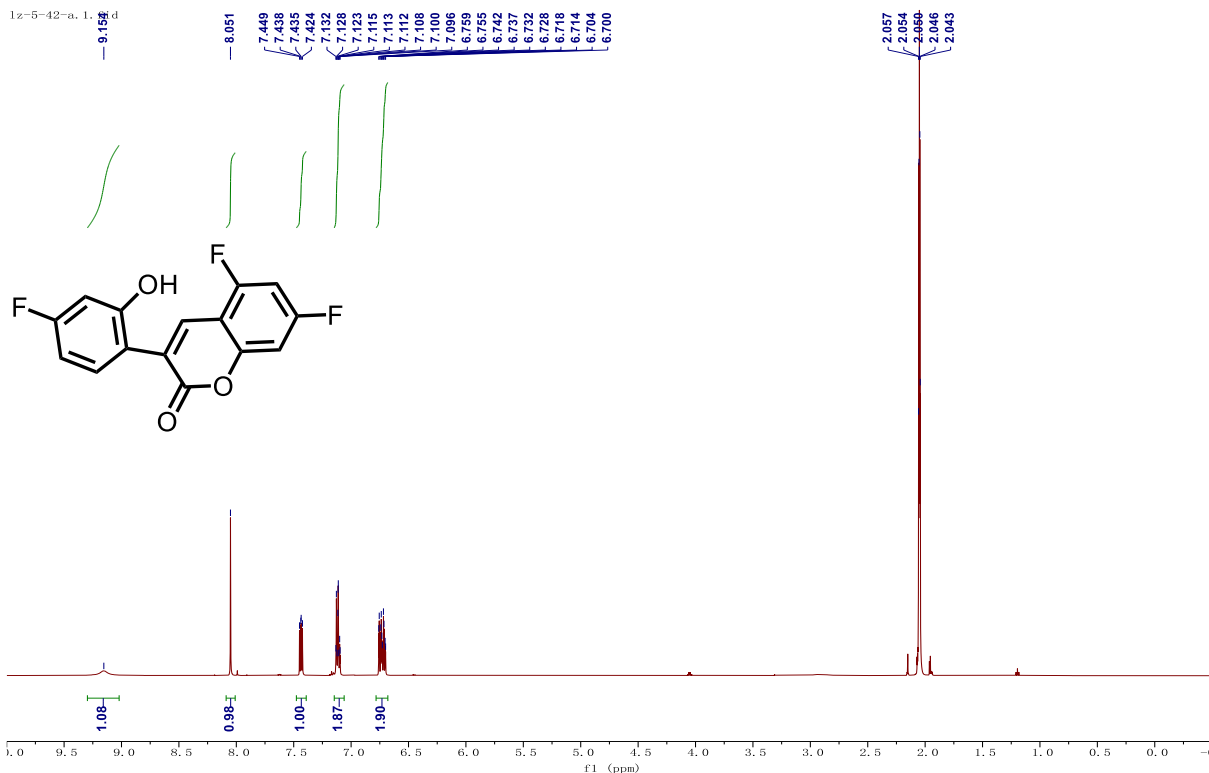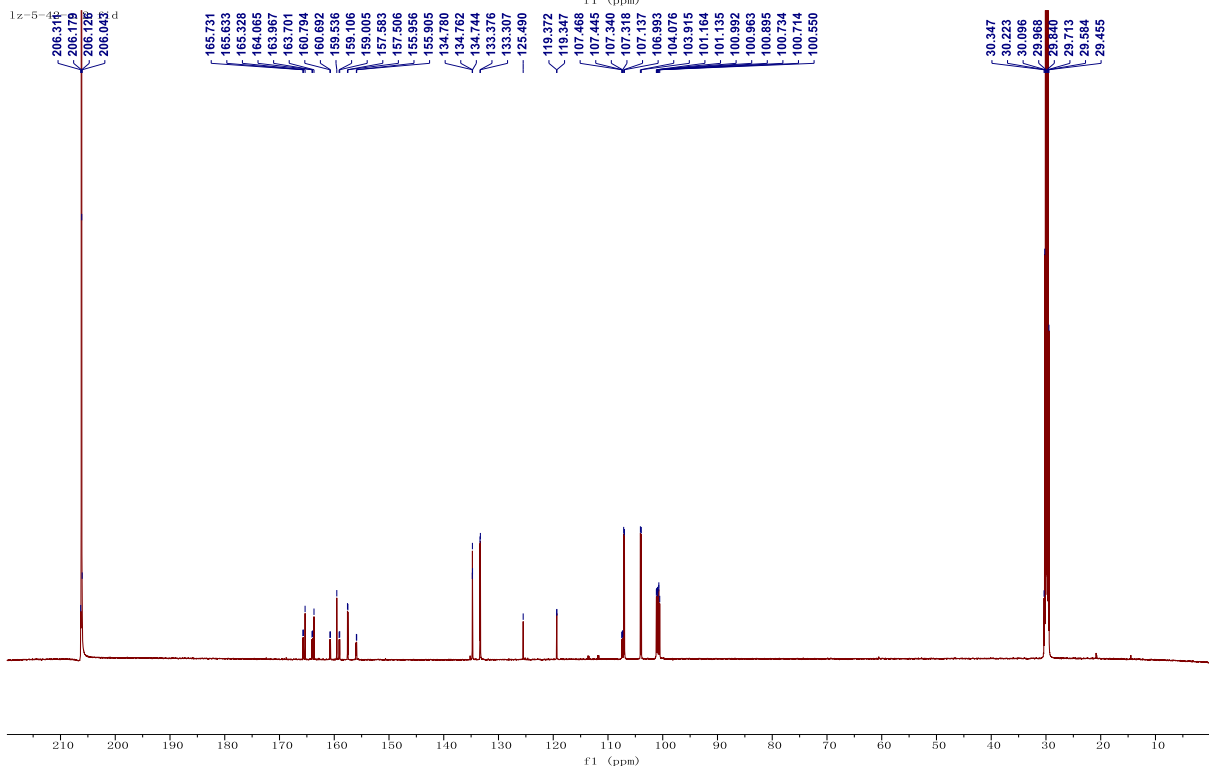

NMR Spectra of 7a



1x-5-42-f

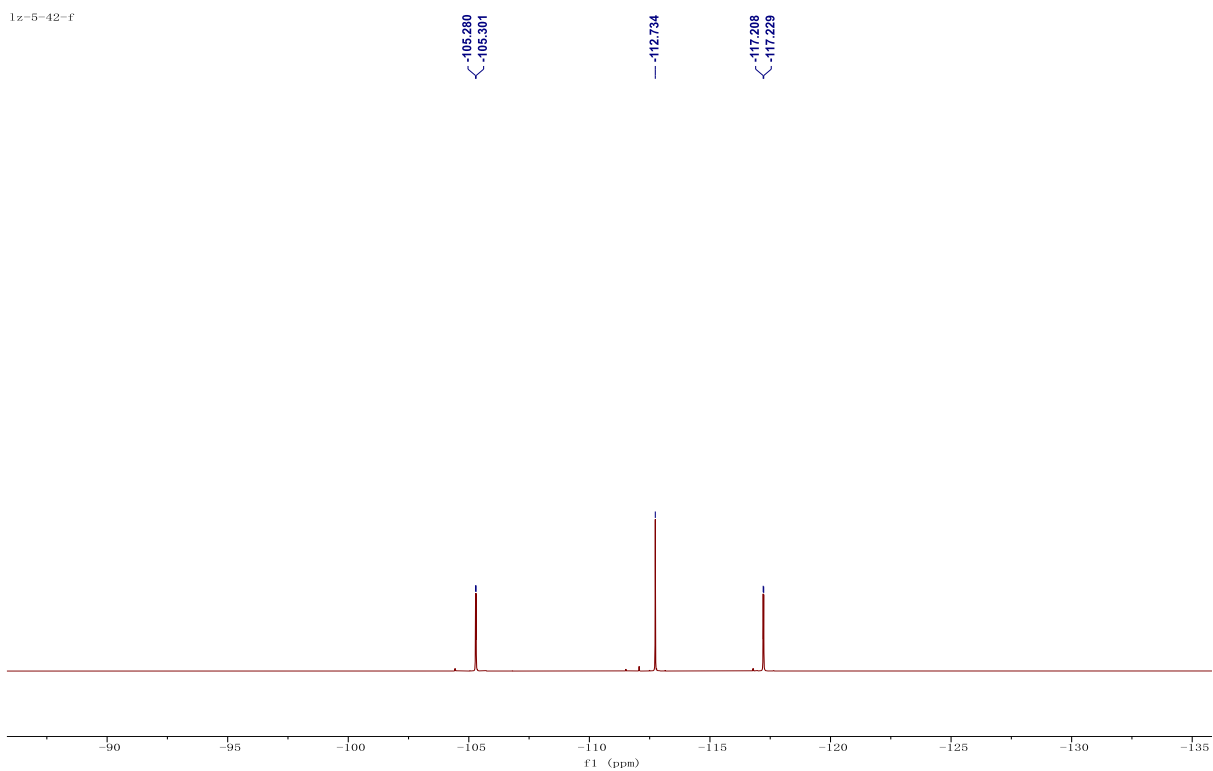

NMR Spectra of **7a**

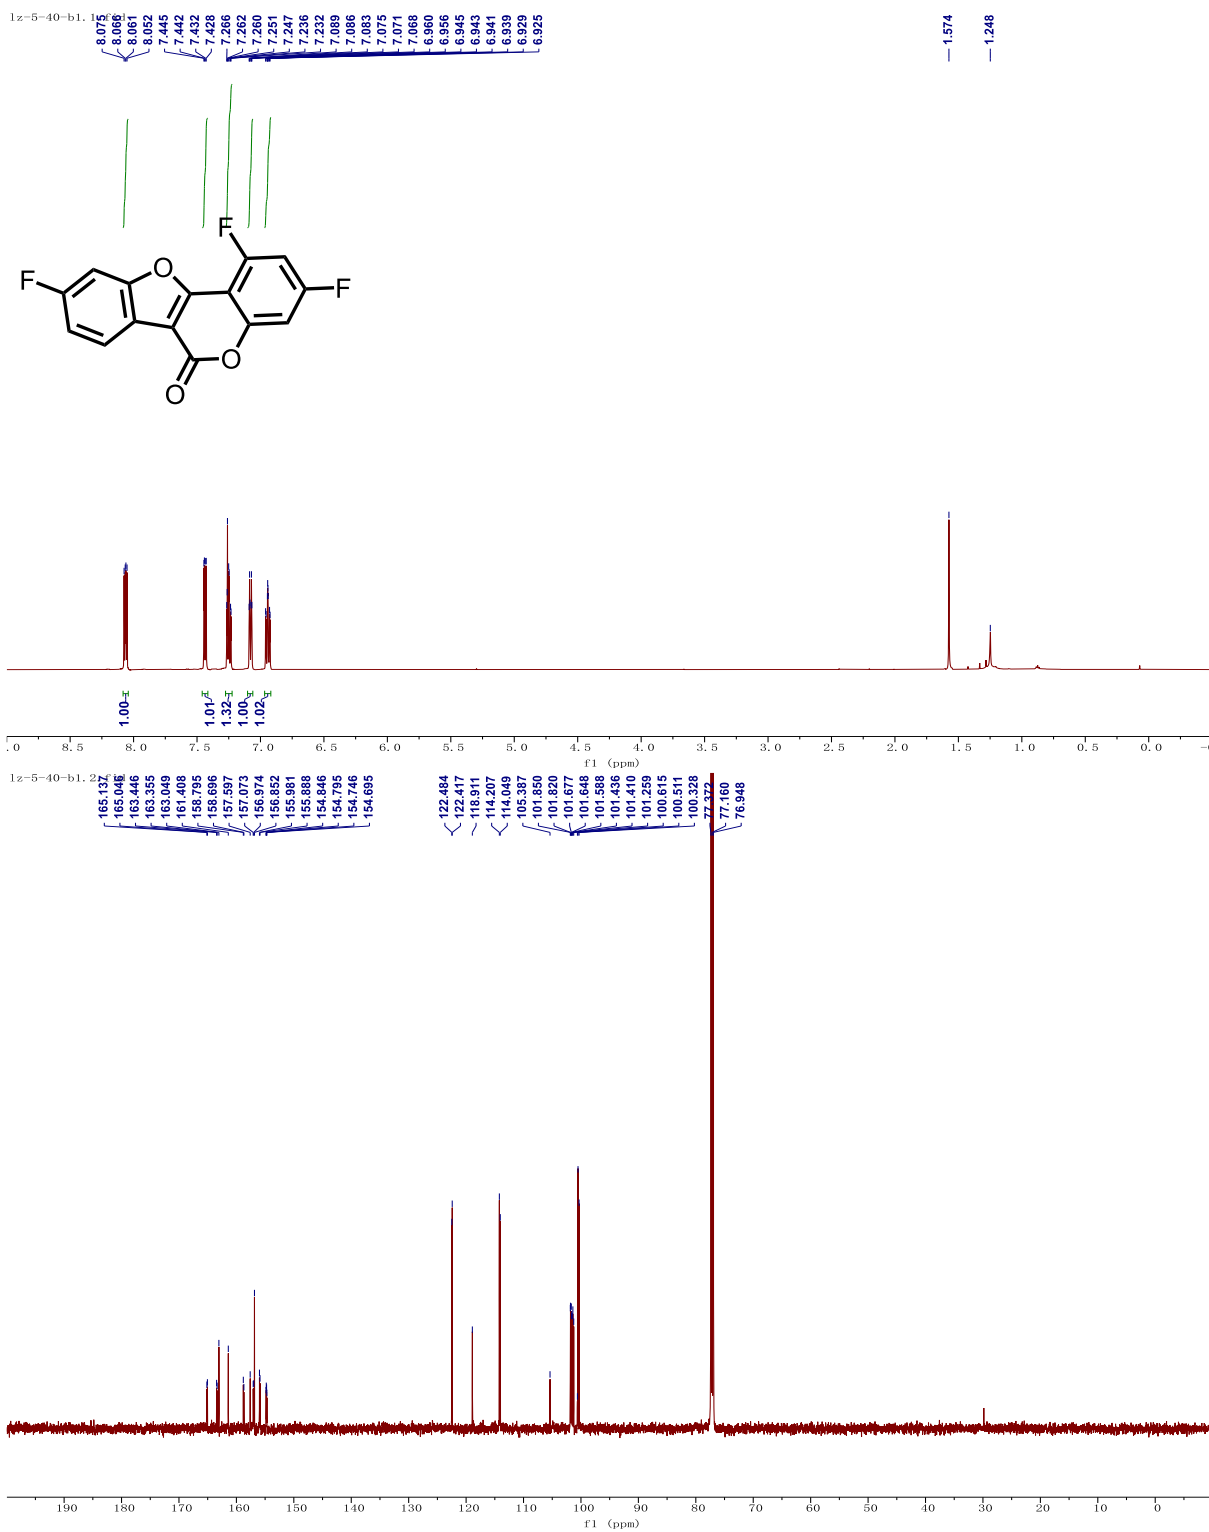

NMR Spectra of 7

lx-5-40-1.2.fid

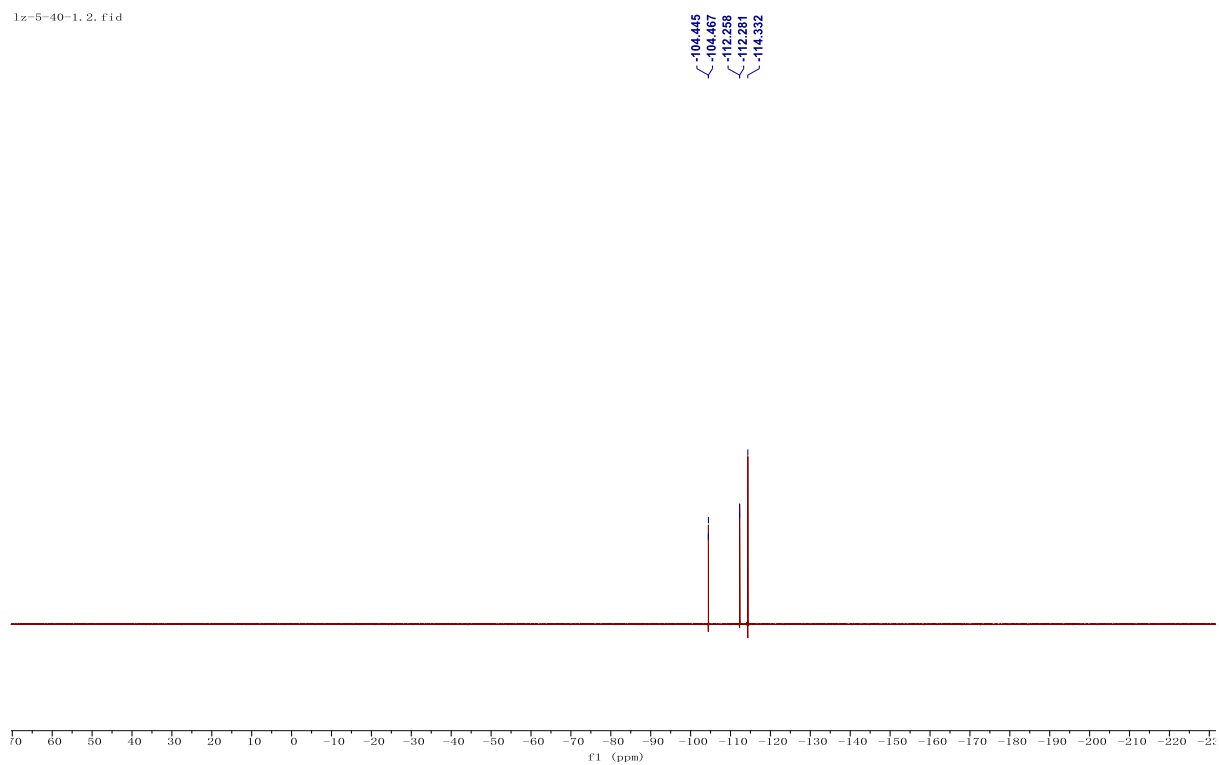

NMR Spectra of 7

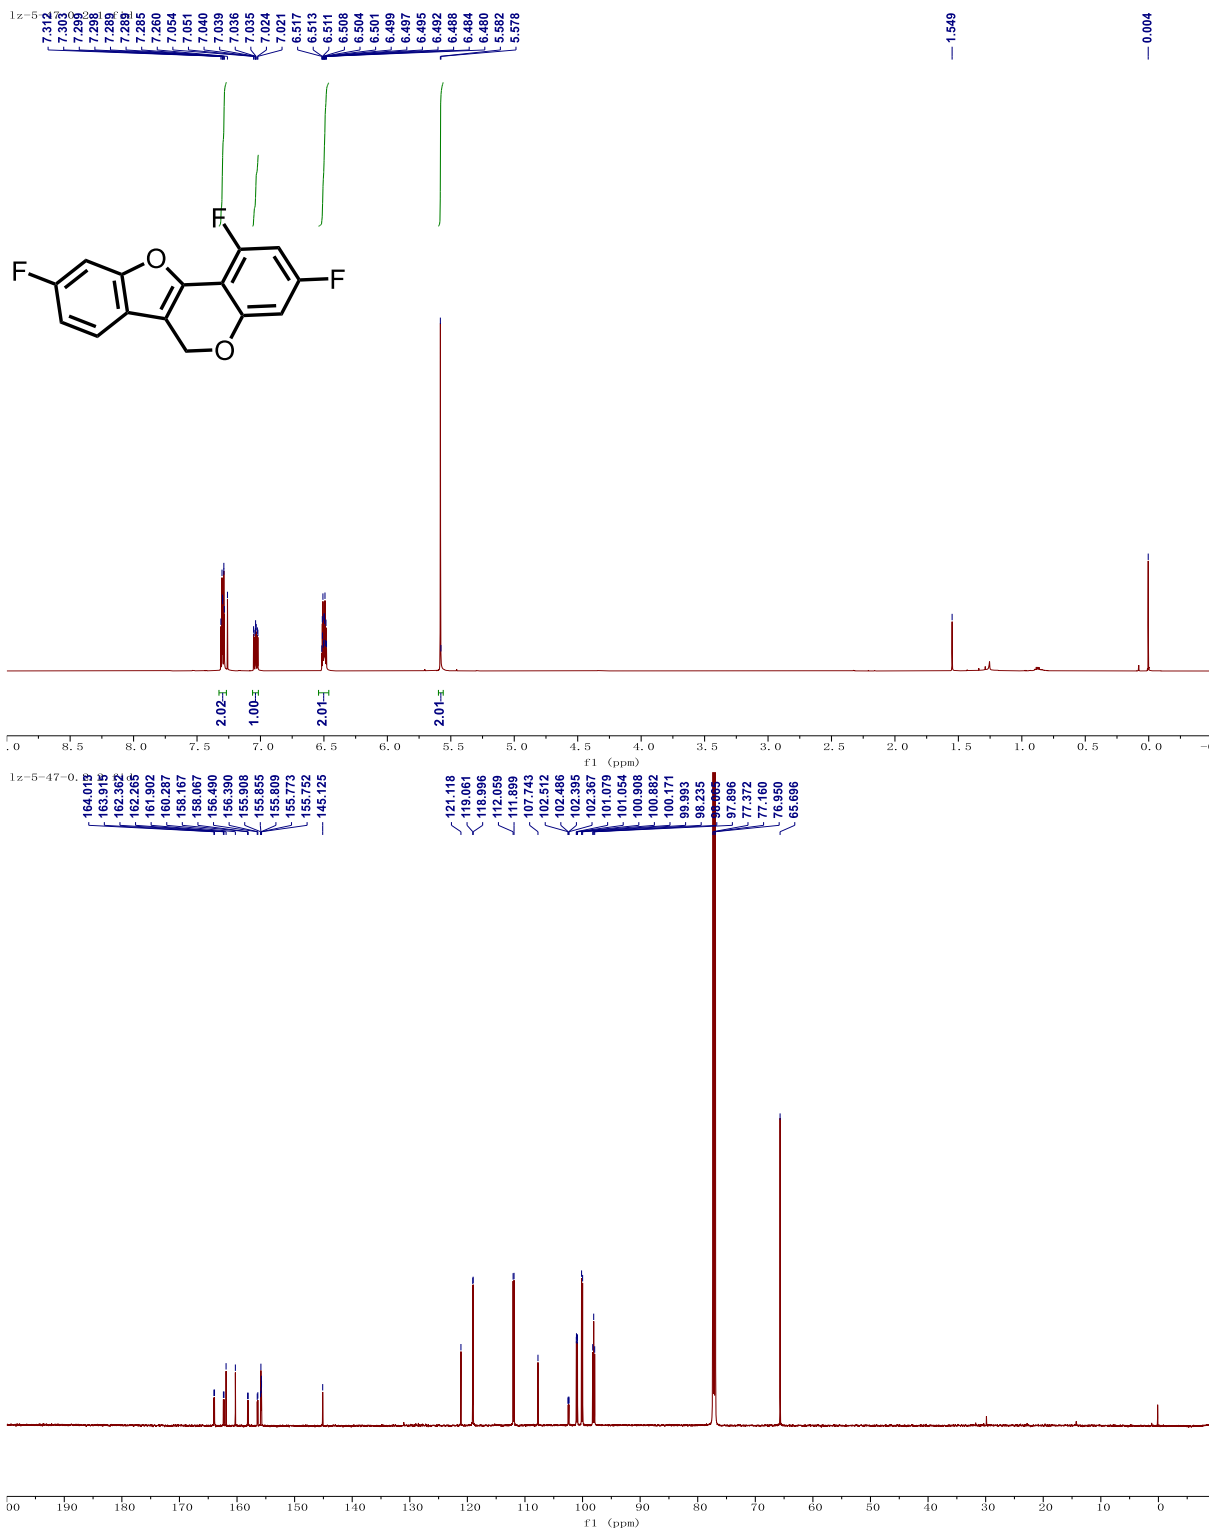

NMR Spectra of **8**

lx-5-47-f22

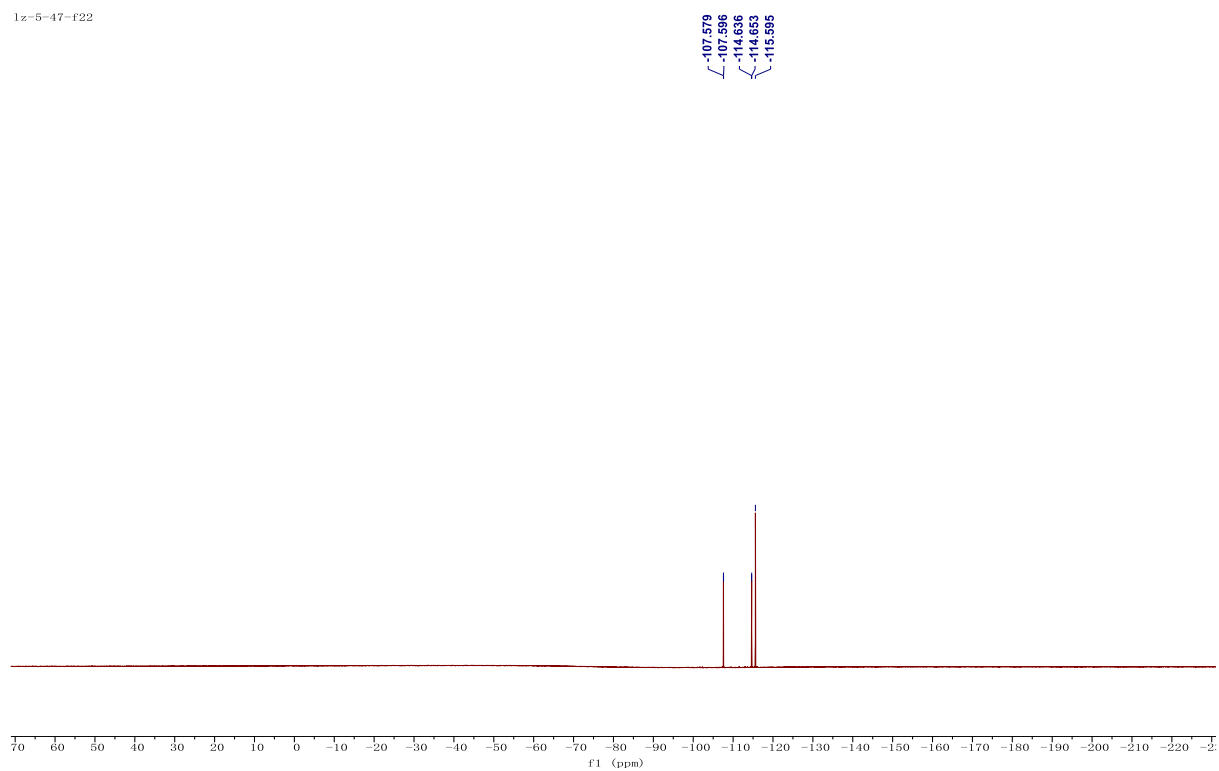

NMR Spectra of **8**
